# Supplementary material for: Global Gene Expression and Docking Profiling of COVID-19 Infection
Source: Front Genet. 2022 Apr 11;13:870836. doi: 10.3389/fgene.2022.870836 (PMC9035897; doi:10.3389/fgene.2022.870836)
Supplement: Supplementary file 2 [file DataSheet1.xlsx]

## Sheet: Sheet1
ID	adj.P.Val	P.Value	logFC	Gene.Type	ORF
SERPING1	0.000285	6.39e-07	1.20217	Endogenous	SERPING1
CD163	0.153884	0.000885	0.696526	Endogenous	CD163
MX1	0.553311	0.0191	0.686078	Endogenous	MX1
CXCL10	0.946005	0.0804	0.673547	Endogenous	CXCL10
C1QB	0.333208	0.00373	0.662631	Endogenous	C1QB
IFITM1	0.998327	0.116	0.62586	Endogenous	IFITM1
BST2	0.613479	0.0302	0.596052	Endogenous	BST2
HLA-DQA1	0.998327	0.301	0.588817	Endogenous	HLA-DQA1
FKBP5	0.668564	0.0374	0.58657	Endogenous	FKBP5
CXCL9	0.913964	0.0736	0.584613	Endogenous	CXCL9
S100A8	0.913964	0.0725	0.568429	Endogenous	S100A8
IRAK2	0.6188	0.0332	0.566904	Endogenous	IRAK2
S100A9	0.998327	0.127	0.557602	Endogenous	S100A9
CEACAM6	0.998327	0.257	0.507702	Endogenous	CEACAM6
IL18R1	0.543975	0.0158	0.505866	Endogenous	IL18R1
NFKBIA	0.807008	0.0544	0.497713	Endogenous	NFKBIA
CD9	0.998327	0.379	0.46944	Endogenous	CD9
CLEC4E	0.998327	0.0993	0.463975	Endogenous	CLEC4E
FCER1G	0.998327	0.127	0.462754	Endogenous	FCER1G
IFIH1	0.491717	0.0121	0.457836	Endogenous	IFIH1
IL1RN	0.998327	0.132	0.454699	Endogenous	IL1RN
XBP1	0.998327	0.423	0.437356	Endogenous	XBP1
SOCS1	0.427111	0.00956	0.433788	Endogenous	SOCS1
TICAM1	0.427111	0.00952	0.427828	Endogenous	TICAM1
CD24	0.998327	0.398	0.426109	Endogenous	CD24
LTF	0.998327	0.103	0.424356	Endogenous	LTF
CEACAM1	0.308698	0.00276	0.419414	Endogenous	CEACAM1
IL18RAP	0.67118	0.0405	0.414465	Endogenous	IL18RAP
IRF7	0.553311	0.0216	0.413641	Endogenous	IRF7
FN1	0.998327	0.135	0.41075	Endogenous	FN1
GBP1	0.543975	0.0151	0.40932	Endogenous	GBP1
CDKN1A	0.553311	0.0225	0.401176	Endogenous	CDKN1A
CXCL11	0.998327	0.206	0.396205	Endogenous	CXCL11
CXCL2	0.998327	0.287	0.381131	Endogenous	CXCL2
C1QA	0.381467	0.00683	0.376417	Endogenous	C1QA
CCRL2	0.553311	0.0202	0.370491	Endogenous	CCRL2
ZBTB16	0.998327	0.228	0.368027	Endogenous	ZBTB16
STAT2	0.998327	0.159	0.364508	Endogenous	STAT2
CD99	0.998327	0.305	0.35881	Endogenous	CD99
CD59	0.998327	0.387	0.355688	Endogenous	CD59
CCL3	0.998327	0.204	0.353303	Endogenous	CCL3
IL18	0.998327	0.14	0.347774	Endogenous	IL18
TNFAIP3	0.998327	0.131	0.343619	Endogenous	TNFAIP3
ARG1	0.998327	0.216	0.340933	Endogenous	ARG1
GAPDH	0.998327	0.163	0.340388	Housekeeping	GAPDH
SRC	0.998327	0.163	0.339059	Endogenous	SRC
MSR1	0.998327	0.235	0.332498	Endogenous	MSR1
LILRB4	0.553311	0.0195	0.32011	Endogenous	LILRB4
CXCL12	0.613479	0.0295	0.315573	Endogenous	CXCL12
PML	0.998327	0.228	0.312691	Endogenous	PML
CEACAM8	0.998327	0.271	0.309283	Endogenous	CEACAM8
LGALS3	0.998327	0.466	0.301046	Endogenous	LGALS3
TAP1	0.998327	0.139	0.293163	Endogenous	TAP1
DEFB4A	0.998327	0.537	0.282824	Endogenous	DEFB4A
IL1R2	0.998327	0.239	0.282246	Endogenous	IL1R2
IFIT2	0.998327	0.296	0.268861	Endogenous	IFIT2
TLR2	0.998327	0.276	0.266791	Endogenous	TLR2
C2	0.998327	0.185	0.265517	Endogenous	C2
TNFAIP6	0.998327	0.153	0.262963	Endogenous	TNFAIP6
TNFSF10	0.998327	0.439	0.262538	Endogenous	TNFSF10
IL6ST	0.913964	0.0733	0.257485	Endogenous	IL6ST
PRDM1	0.998327	0.111	0.257383	Endogenous	PRDM1
ICAM1	0.613479	0.0308	0.25515	Endogenous	ICAM1
TLR5	0.613479	0.0316	0.252782	Endogenous	TLR5
STAT1	0.998327	0.383	0.249922	Endogenous	STAT1
IFI35	0.998327	0.345	0.244626	Endogenous	IFI35
MIF	0.998327	0.5	0.244512	Endogenous	MIF
MAPK14	0.998327	0.315	0.24105	Endogenous	MAPK14
MARCO	0.998327	0.232	0.239122	Endogenous	MARCO
FCGR1A/B	0.998327	0.362	0.233033	Endogenous	FCGR1A/B
IL1R1	0.998327	0.172	0.227573	Endogenous	IL1R1
ITGB1	0.998327	0.249	0.22685	Endogenous	ITGB1
GZMB	0.998327	0.469	0.224875	Endogenous	GZMB
C3	0.998327	0.644	0.223209	Endogenous	C3
LAIR1	0.998327	0.274	0.221405	Endogenous	LAIR1
TOLLIP	0.998327	0.268	0.221397	Endogenous	TOLLIP
IRAK1	0.998327	0.43	0.221144	Endogenous	IRAK1
LTB4R	0.998327	0.331	0.219925	Endogenous	LTB4R
TGFB1	0.998327	0.434	0.21949	Endogenous	TGFB1
APP	0.998327	0.623	0.217958	Endogenous	APP
CCL2	0.998327	0.435	0.212478	Endogenous	CCL2
BCL6	0.998327	0.495	0.207389	Endogenous	BCL6
TMEM173	0.998327	0.668	0.205178	Endogenous	TMEM173
CD276	0.998327	0.446	0.201421	Endogenous	CD276
CD274	0.998327	0.105	0.201291	Endogenous	CD274
CCND3	0.998327	0.377	0.19969	Endogenous	CCND3
CD83	0.998327	0.281	0.198879	Endogenous	CD83
HLA-DQB1	0.998327	0.641	0.196098	Endogenous	HLA-DQB1
TRAF4	0.998327	0.556	0.194953	Endogenous	TRAF4
JAK2	0.998327	0.348	0.193971	Endogenous	JAK2
C1QBP	0.998327	0.464	0.192842	Endogenous	C1QBP
PSMC2	0.998327	0.373	0.192727	Endogenous	PSMC2
IRAK3	0.998327	0.169	0.191598	Endogenous	IRAK3
BLNK	0.998327	0.371	0.187473	Endogenous	BLNK
MAPKAPK2	0.998327	0.507	0.187374	Endogenous	MAPKAPK2
CASP3	0.998327	0.345	0.18594	Endogenous	CASP3
LILRA6	0.998327	0.45	0.185097	Endogenous	LILRA6
IL4R	0.998327	0.499	0.183392	Endogenous	IL4R
CSF1	0.998327	0.094	0.182904	Endogenous	CSF1
KLRC2	0.998327	0.303	0.180188	Endogenous	KLRC2
IDO1	0.998327	0.575	0.178655	Endogenous	IDO1
GPI	0.998327	0.551	0.174633	Endogenous	GPI
GP1BB	0.998327	0.627	0.172344	Endogenous	GP1BB
IKBKB	0.998327	0.498	0.171116	Endogenous	IKBKB
POLR2A	0.998327	0.526	0.170993	Housekeeping	POLR2A
ITGAM	0.998327	0.568	0.167806	Endogenous	ITGAM
CR1	0.998327	0.632	0.16689	Endogenous	CR1
IRF4	0.998327	0.358	0.155133	Endogenous	IRF4
IL1RL1	0.998327	0.478	0.15502	Endogenous	IL1RL1
PRF1	0.998327	0.656	0.15486	Endogenous	PRF1
MYD88	0.998327	0.455	0.154262	Endogenous	MYD88
ADA	0.998327	0.184	0.153313	Endogenous	ADA
CCL4	0.998327	0.382	0.152379	Endogenous	CCL4
LTBR	0.998327	0.517	0.145506	Endogenous	LTBR
LAMP3	0.998327	0.556	0.144229	Endogenous	LAMP3
IFI16	0.998327	0.493	0.143067	Endogenous	IFI16
TNFSF15	0.998327	0.503	0.138084	Endogenous	TNFSF15
BAX	0.998327	0.619	0.137535	Endogenous	BAX
CD86	0.998327	0.463	0.136824	Endogenous	CD86
CFB	0.998327	0.738	0.134969	Endogenous	CFB
CCL8	0.998327	0.615	0.133124	Endogenous	CCL8
NOD2	0.998327	0.327	0.13166	Endogenous	NOD2
GZMA	0.998327	0.442	0.130914	Endogenous	GZMA
PSMB5	0.998327	0.538	0.126737	Endogenous	PSMB5
LY96	0.998327	0.549	0.12657	Endogenous	LY96
CLEC5A	0.998327	0.574	0.124552	Endogenous	CLEC5A
CXCR4	0.998327	0.628	0.123294	Endogenous	CXCR4
TNFRSF11A	0.998327	0.495	0.123234	Endogenous	TNFRSF11A
CFH	0.998327	0.779	0.121774	Endogenous	CFH
BCAP31	0.998327	0.708	0.120805	Endogenous	BCAP31
PRKCD	0.998327	0.651	0.11752	Endogenous	PRKCD
DEFB103A	0.998327	0.693	0.116898	Endogenous	DEFB103A
RUNX1	0.998327	0.755	0.112994	Endogenous	RUNX1
B2M	0.998327	0.77	0.111474	Endogenous	B2M
TAP2	0.998327	0.488	0.110677	Endogenous	TAP2
GFI1	0.998327	0.425	0.107939	Endogenous	GFI1
HRAS	0.998327	0.641	0.107718	Endogenous	HRAS
GBP5	0.998327	0.683	0.107597	Endogenous	GBP5
HAVCR2	0.998327	0.469	0.106243	Endogenous	HAVCR2
CASP1	0.998327	0.585	0.105872	Endogenous	CASP1
CD53	0.998327	0.723	0.105049	Endogenous	CD53
PTK2	0.998327	0.767	0.104076	Endogenous	PTK2
TNF	0.998327	0.483	0.101255	Endogenous	TNF
IL2RG	0.998327	0.796	0.100355	Endogenous	IL2RG
TUBB	0.998327	0.541	0.099747	Housekeeping	TUBB
BCL10	0.998327	0.37	0.099449	Endogenous	BCL10
TNFSF8	0.998327	0.638	0.099289	Endogenous	TNFSF8
AHR	0.998327	0.681	0.0992	Endogenous	AHR
ABL1	0.998327	0.696	0.097759	Endogenous	ABL1
ATG7	0.998327	0.318	0.096644	Endogenous	ATG7
TBK1	0.998327	0.539	0.095113	Endogenous	TBK1
BATF3	0.998327	0.272	0.094642	Endogenous	BATF3
CYBB	0.998327	0.739	0.093808	Endogenous	CYBB
HFE	0.998327	0.393	0.093018	Endogenous	HFE
CTNNB1	0.998327	0.802	0.089716	Endogenous	CTNNB1
LTB4R2	0.998327	0.604	0.089253	Endogenous	LTB4R2
TLR3	0.998327	0.66	0.088822	Endogenous	TLR3
PSMB8	0.998327	0.856	0.085699	Endogenous	PSMB8
PSMB7	0.998327	0.679	0.085089	Endogenous	PSMB7
CCR2	0.998327	0.823	0.081373	Endogenous	CCR2
IL8	0.998327	0.894	0.080844	Endogenous	IL8
PSMD7	0.998327	0.702	0.080258	Endogenous	PSMD7
SELL	0.998327	0.836	0.07966	Endogenous	SELL
IL21	0.998327	0.804	0.078932	Endogenous	IL21
ATG5	0.998327	0.627	0.078026	Endogenous	ATG5
ITGA2B	0.998327	0.779	0.077386	Endogenous	ITGA2B
BCL2	0.998327	0.748	0.076313	Endogenous	BCL2
RELA	0.998327	0.727	0.075299	Endogenous	RELA
RELB	0.998327	0.679	0.073332	Endogenous	RELB
NFKBIZ	0.998327	0.741	0.07194	Endogenous	NFKBIZ
SLAMF7	0.998327	0.576	0.071893	Endogenous	SLAMF7
IL23A	0.998327	0.76	0.071674	Endogenous	IL23A
IRF8	0.998327	0.703	0.069751	Endogenous	IRF8
CD81	0.998327	0.901	0.064569	Endogenous	CD81
IL15	0.998327	0.604	0.063721	Endogenous	IL15
HLA-A	0.998327	0.873	0.062856	Endogenous	HLA-A
C14orf166	0.998327	0.649	0.061963	Endogenous	C14orf166
LILRA5	0.998327	0.856	0.060342	Endogenous	LILRA5
IFNA1/13	0.998327	0.869	0.057065	Endogenous	IFNA1/13
NLRP3	0.998327	0.693	0.056986	Endogenous	NLRP3
CCL11	0.998327	0.82	0.055042	Endogenous	CCL11
ILF3	0.998327	0.819	0.054911	Endogenous	ILF3
IKBKE	0.998327	0.785	0.054232	Endogenous	IKBKE
PSMB9	0.998327	0.88	0.053354	Endogenous	PSMB9
C5	0.998327	0.64	0.052659	Endogenous	C5
TGFBR1	0.998327	0.616	0.050645	Endogenous	TGFBR1
NFKB1	0.998327	0.586	0.048665	Endogenous	NFKB1
CCR1	0.998327	0.825	0.048114	Endogenous	CCR1
CCL18	0.998327	0.885	0.044693	Endogenous	CCL18
LCP2	0.998327	0.827	0.043157	Endogenous	LCP2
CLEC6A	0.998327	0.858	0.043124	Endogenous	CLEC6A
RARRES3	0.998327	0.89	0.042131	Endogenous	RARRES3
HLA-DRB1	0.998327	0.922	0.040082	Endogenous	HLA-DRB1
IRF5	0.998327	0.851	0.03988	Endogenous	IRF5
ATG10	0.998327	0.821	0.039151	Endogenous	ATG10
CD58	0.998327	0.817	0.036729	Endogenous	CD58
TCF4	0.998327	0.809	0.03664	Endogenous	TCF4
SMAD3	0.998327	0.886	0.034149	Endogenous	SMAD3
PLAUR	0.998327	0.845	0.033326	Endogenous	PLAUR
CTSG	0.998327	0.865	0.032537	Endogenous	CTSG
CCR5	0.998327	0.837	0.026994	Endogenous	CCR5
PTPN2	0.998327	0.892	0.025306	Endogenous	PTPN2
BATF	0.998327	0.83	0.023544	Endogenous	BATF
SLC2A1	0.998327	0.906	0.02336	Endogenous	SLC2A1
KLRG2	0.998327	0.845	0.02246	Endogenous	KLRG2
IKBKG	0.998327	0.916	0.021514	Endogenous	IKBKG
BCL2L11	0.998327	0.89	0.021485	Endogenous	BCL2L11
IL10RA	0.998327	0.959	0.016473	Endogenous	IL10RA
HLA-B	0.998327	0.968	0.015235	Endogenous	HLA-B
KCNJ2	0.998327	0.946	0.014516	Endogenous	KCNJ2
IRAK4	0.998327	0.881	0.012511	Endogenous	IRAK4
TRAF6	0.998327	0.839	0.011418	Endogenous	TRAF6
TFRC	0.998327	0.932	0.010835	Endogenous	TFRC
IFNA2	0.998327	0.97	0.010414	Endogenous	IFNA2
IFNGR1	0.998327	0.961	0.009003	Endogenous	IFNGR1
CXCR3	0.998327	0.964	0.008776	Endogenous	CXCR3
CD48	0.998327	0.976	0.008285	Endogenous	CD48
MAP4K2	0.998327	0.976	0.008065	Endogenous	MAP4K2
CLU	0.998327	0.966	0.006112	Endogenous	CLU
CTLA4_all	0.998327	0.971	0.005975	Endogenous	CTLA4_all
SMAD5	0.998327	0.964	0.005592	Endogenous	SMAD5
HPRT1	0.998327	0.973	0.003409	Housekeeping	HPRT1
STAT3	0.998327	0.988	0.003088	Endogenous	STAT3
LILRB1	0.998327	0.99	0.002203	Endogenous	LILRB1
HLA-DMA	0.998327	0.995	0.001508	Endogenous	HLA-DMA
NFKB2	0.998327	0.994	0.001017	Endogenous	NFKB2
UBE2L3	0.998327	0.998	0.000239	Endogenous	UBE2L3
TRAF2	0.998327	0.997	-0.000499	Endogenous	TRAF2
ATG16L1	0.998327	0.986	-0.002595	Endogenous	ATG16L1
TNFSF4	0.998327	0.984	-0.002727	Endogenous	TNFSF4
TNFSF13B	0.998327	0.982	-0.00447	Endogenous	TNFSF13B
TBX21	0.998327	0.986	-0.005483	Endogenous	TBX21
CD82	0.998327	0.98	-0.006117	Endogenous	CD82
CD164	0.998327	0.981	-0.006708	Endogenous	CD164
ICOSLG	0.998327	0.948	-0.006954	Endogenous	ICOSLG
MR1	0.998327	0.926	-0.008179	Endogenous	MR1
BST1	0.998327	0.968	-0.008289	Endogenous	BST1
CCL5	0.998327	0.986	-0.008312	Endogenous	CCL5
CASP10	0.998327	0.963	-0.009245	Endogenous	CASP10
IL13RA1	0.998327	0.963	-0.009445	Endogenous	IL13RA1
CMKLR1	0.998327	0.945	-0.009883	Endogenous	CMKLR1
HLA-C	0.998327	0.967	-0.011334	Endogenous	HLA-C
MAPK1	0.998327	0.959	-0.011399	Endogenous	MAPK1
RPL19	0.998327	0.973	-0.011769	Housekeeping	RPL19
CASP2	0.998327	0.94	-0.011995	Endogenous	CASP2
TP53	0.998327	0.95	-0.012172	Endogenous	TP53
NOTCH2	0.998327	0.968	-0.012704	Endogenous	NOTCH2
CXCL1	0.998327	0.964	-0.01273	Endogenous	CXCL1
MALT1	0.998327	0.898	-0.013277	Endogenous	MALT1
CRADD	0.998327	0.931	-0.013398	Endogenous	CRADD
CCRL1	0.998327	0.97	-0.014191	Endogenous	CCRL1
KLRC4	0.998327	0.922	-0.014959	Endogenous	KLRC4
NCR1	0.998327	0.948	-0.015305	Endogenous	NCR1
XCL1	0.998327	0.953	-0.015743	Endogenous	XCL1
PDGFRB	0.998327	0.92	-0.016766	Endogenous	PDGFRB
NFIL3	0.998327	0.904	-0.017442	Endogenous	NFIL3
TNFRSF1B	0.998327	0.948	-0.020573	Endogenous	TNFRSF1B
CD8B	0.998327	0.886	-0.021199	Endogenous	CD8B
CUL9	0.998327	0.896	-0.02427	Endogenous	CUL9
LTA	0.998327	0.841	-0.024481	Endogenous	LTA
FAS	0.998327	0.814	-0.02596	Endogenous	FAS
CD36	0.998327	0.901	-0.02822	Endogenous	CD36
ITGAE	0.998327	0.806	-0.028383	Endogenous	ITGAE
IL2RB	0.998327	0.903	-0.029151	Endogenous	IL2RB
CD80	0.998327	0.889	-0.033114	Endogenous	CD80
MAPK11	0.998327	0.755	-0.034326	Endogenous	MAPK11
ATM	0.998327	0.686	-0.036218	Endogenous	ATM
STAT5A	0.998327	0.848	-0.038577	Endogenous	STAT5A
TRAF3	0.998327	0.836	-0.040332	Endogenous	TRAF3
CD46	0.998327	0.849	-0.042759	Endogenous	CD46
CISH	0.998327	0.793	-0.043536	Endogenous	CISH
MAP4K4	0.998327	0.803	-0.04368	Endogenous	MAP4K4
KLRC1	0.998327	0.772	-0.043943	Endogenous	KLRC1
FADD	0.998327	0.564	-0.044653	Endogenous	FADD
GNLY	0.998327	0.924	-0.048307	Endogenous	GNLY
ICOS	0.998327	0.76	-0.048881	Endogenous	ICOS
TAL1	0.998327	0.796	-0.050441	Endogenous	TAL1
CD40	0.998327	0.725	-0.053781	Endogenous	CD40
TLR4	0.998327	0.825	-0.054153	Endogenous	TLR4
CHUK	0.998327	0.569	-0.054229	Endogenous	CHUK
JAK3	0.998327	0.844	-0.054433	Endogenous	JAK3
IRF1	0.998327	0.836	-0.054937	Endogenous	IRF1
KIR_Activating_Subgroup_2	0.998327	0.813	-0.055827	Endogenous	KIR_Activating_Subgroup_2
IKBKAP	0.998327	0.86	-0.057365	Endogenous	IKBKAP
PDCD2	0.998327	0.637	-0.057822	Endogenous	PDCD2
PTPN22	0.998327	0.631	-0.058511	Endogenous	PTPN22
IFNAR1	0.998327	0.466	-0.060495	Endogenous	IFNAR1
TLR7	0.998327	0.601	-0.063733	Endogenous	TLR7
NT5E	0.998327	0.78	-0.064226	Endogenous	NT5E
CD14	0.998327	0.752	-0.064317	Endogenous	CD14
MCL1	0.998327	0.776	-0.064335	Endogenous	MCL1
HLA-DRB3	0.998327	0.816	-0.065285	Endogenous	HLA-DRB3
RAF1	0.998327	0.808	-0.065288	Endogenous	RAF1
IL2RA	0.998327	0.664	-0.070325	Endogenous	IL2RA
CARD9	0.998327	0.428	-0.071205	Endogenous	CARD9
TLR9	0.998327	0.52	-0.072204	Endogenous	TLR9
ITGAX	0.998327	0.755	-0.07398	Endogenous	ITGAX
IL6R	0.998327	0.785	-0.074902	Endogenous	IL6R
TGFBI	0.998327	0.787	-0.075648	Endogenous	TGFBI
IL23R	0.998327	0.782	-0.076961	Endogenous	IL23R
POU2F2	0.998327	0.785	-0.078434	Endogenous	POU2F2
IFNG	0.998327	0.77	-0.079429	Endogenous	IFNG
CD8A	0.998327	0.728	-0.079689	Endogenous	CD8A
IKZF2	0.998327	0.696	-0.081117	Endogenous	IKZF2
CD74	0.998327	0.855	-0.081287	Endogenous	CD74
STAT4	0.998327	0.533	-0.081329	Endogenous	STAT4
PYCARD	0.998327	0.703	-0.082359	Endogenous	PYCARD
IKZF1	0.998327	0.759	-0.083327	Endogenous	IKZF1
TAPBP	0.998327	0.745	-0.083352	Endogenous	TAPBP
KLRK1	0.998327	0.664	-0.087137	Endogenous	KLRK1
SIGIRR	0.998327	0.734	-0.090767	Endogenous	SIGIRR
RORC	0.998327	0.635	-0.093133	Endogenous	RORC
IL12B	0.998327	0.779	-0.093683	Endogenous	IL12B
CD1D	0.998327	0.652	-0.09425	Endogenous	CD1D
SOCS3	0.998327	0.692	-0.095739	Endogenous	SOCS3
IGF2R	0.998327	0.726	-0.096287	Endogenous	IGF2R
BTK	0.998327	0.608	-0.097719	Endogenous	BTK
ITGB2	0.998327	0.767	-0.098651	Endogenous	ITGB2
NFATC3	0.998327	0.414	-0.100739	Endogenous	NFATC3
NCAM1	0.998327	0.471	-0.102625	Endogenous	NCAM1
ATG12	0.998327	0.251	-0.102815	Endogenous	ATG12
STAT5B	0.998327	0.651	-0.106	Endogenous	STAT5B
CXCR6	0.998327	0.415	-0.109023	Endogenous	CXCR6
ITGA5	0.998327	0.729	-0.109594	Endogenous	ITGA5
ITGAL	0.998327	0.691	-0.1102	Endogenous	ITGAL
ZEB1	0.998327	0.318	-0.112971	Endogenous	ZEB1
CD2	0.998327	0.641	-0.1138	Endogenous	CD2
TNFSF12	0.998327	0.748	-0.114351	Endogenous	TNFSF12
NOD1	0.998327	0.394	-0.115277	Endogenous	NOD1
IL12RB1	0.998327	0.397	-0.116317	Endogenous	IL12RB1
EEF1G	0.998327	0.726	-0.116531	Housekeeping	EEF1G
BID	0.998327	0.368	-0.118439	Endogenous	BID
IKZF3	0.998327	0.629	-0.120461	Endogenous	IKZF3
TGFBR2	0.998327	0.62	-0.120796	Endogenous	TGFBR2
LILRB2	0.998327	0.689	-0.121305	Endogenous	LILRB2
IL7	0.998327	0.385	-0.124033	Endogenous	IL7
NOTCH1	0.998327	0.491	-0.126014	Endogenous	NOTCH1
ARHGDIB	0.998327	0.713	-0.128128	Endogenous	ARHGDIB
TCF7	0.998327	0.687	-0.129106	Endogenous	TCF7
BTLA	0.998327	0.572	-0.129788	Endogenous	BTLA
LCK	0.998327	0.685	-0.130378	Endogenous	LCK
SKI	0.998327	0.232	-0.133309	Endogenous	SKI
LILRA3	0.998327	0.603	-0.13404	Endogenous	LILRA3
TLR8	0.998327	0.661	-0.134941	Endogenous	TLR8
CD27	0.998327	0.683	-0.137323	Endogenous	CD27
ENTPD1	0.998327	0.497	-0.138846	Endogenous	ENTPD1
NFATC1	0.998327	0.492	-0.139755	Endogenous	NFATC1
CLEC4A	0.998327	0.281	-0.140005	Endogenous	CLEC4A
ITGA6	0.998327	0.368	-0.141142	Endogenous	ITGA6
ICAM4	0.998327	0.241	-0.145045	Endogenous	ICAM4
KLRAP1	0.998327	0.229	-0.147013	Endogenous	KLRAP1
HLA-DMB	0.998327	0.55	-0.147181	Endogenous	HLA-DMB
FCGR3A/B	0.998327	0.727	-0.15036	Endogenous	FCGR3A/B
NFATC2	0.998327	0.573	-0.151335	Endogenous	NFATC2
NCF4	0.998327	0.572	-0.15586	Endogenous	NCF4
PAX5	0.998327	0.367	-0.157772	Endogenous	PAX5
HLA-DPA1	0.998327	0.553	-0.158021	Endogenous	HLA-DPA1
MME	0.998327	0.608	-0.15929	Endogenous	MME
TNFRSF14	0.998327	0.603	-0.162291	Endogenous	TNFRSF14
ICAM2	0.998327	0.571	-0.162527	Endogenous	ICAM2
TYK2	0.998327	0.57	-0.16376	Endogenous	TYK2
TIGIT	0.998327	0.357	-0.163772	Endogenous	TIGIT
SLAMF1	0.998327	0.268	-0.164057	Endogenous	SLAMF1
PTGS2	0.998327	0.521	-0.166338	Endogenous	PTGS2
JAK1	0.998327	0.43	-0.1686	Endogenous	JAK1
BCL3	0.998327	0.268	-0.170371	Endogenous	BCL3
PTGER4	0.998327	0.123	-0.171306	Endogenous	PTGER4
HLA-DOB	0.998327	0.143	-0.171361	Endogenous	HLA-DOB
CD96	0.998327	0.479	-0.173095	Endogenous	CD96
CTSC	0.998327	0.505	-0.173509	Endogenous	CTSC
CD3D	0.998327	0.522	-0.174121	Endogenous	CD3D
ETS1	0.998327	0.569	-0.175257	Endogenous	ETS1
GZMK	0.998327	0.506	-0.177945	Endogenous	GZMK
ABCB1	0.998327	0.353	-0.178094	Endogenous	ABCB1
MAF	0.998327	0.333	-0.178175	Endogenous	MAF
CD247	0.998327	0.596	-0.182367	Endogenous	CD247
SELPLG	0.998327	0.486	-0.186536	Endogenous	SELPLG
IL21R	0.998327	0.259	-0.187071	Endogenous	IL21R
TAGAP	0.998327	0.46	-0.188438	Endogenous	TAGAP
HLA-DRA	0.998327	0.634	-0.188937	Endogenous	HLA-DRA
IFNAR2	0.998327	0.45	-0.193217	Endogenous	IFNAR2
MBP	0.998327	0.391	-0.196841	Endogenous	MBP
LILRA1	0.998327	0.38	-0.199019	Endogenous	LILRA1
CD44	0.998327	0.388	-0.20251	Endogenous	CD44
CSF1R	0.948648	0.0828	-0.206302	Endogenous	CSF1R
PSMB10	0.998327	0.565	-0.206916	Endogenous	PSMB10
PTPN6	0.998327	0.49	-0.207207	Endogenous	PTPN6
IL11RA	0.553311	0.0235	-0.207473	Endogenous	IL11RA
CEBPB	0.998327	0.347	-0.211497	Endogenous	CEBPB
LILRB3	0.998327	0.438	-0.212203	Endogenous	LILRB3
CD160	0.998327	0.227	-0.217629	Endogenous	CD160
MAP4K1	0.998327	0.253	-0.220761	Endogenous	MAP4K1
CX3CR1	0.998327	0.565	-0.221486	Endogenous	CX3CR1
TLR1	0.998327	0.268	-0.22223	Endogenous	TLR1
TRAF1	0.998327	0.0928	-0.223898	Endogenous	TRAF1
LILRA2	0.998327	0.537	-0.229589	Endogenous	LILRA2
CD4	0.998327	0.339	-0.230266	Endogenous	CD4
CD6	0.998327	0.314	-0.231385	Endogenous	CD6
CFP	0.998327	0.516	-0.232207	Endogenous	CFP
PTPRC_all	0.998327	0.497	-0.233898	Endogenous	PTPRC_all
CD3E	0.998327	0.511	-0.235639	Endogenous	CD3E
TNFRSF8	0.998327	0.156	-0.238483	Endogenous	TNFRSF8
CASP8	0.998327	0.246	-0.23936	Endogenous	CASP8
RAG1	0.998327	0.0895	-0.239521	Endogenous	RAG1
STAT6	0.998327	0.323	-0.241827	Endogenous	STAT6
HLA-DPB1	0.998327	0.349	-0.242848	Endogenous	HLA-DPB1
CD28	0.998327	0.314	-0.243314	Endogenous	CD28
CFD	0.998327	0.423	-0.244343	Endogenous	CFD
ZAP70	0.998327	0.512	-0.247476	Endogenous	ZAP70
KLRF1	0.921227	0.0763	-0.249661	Endogenous	KLRF1
ITLN1	0.998327	0.192	-0.253024	Endogenous	ITLN1
FCGR2A/C	0.998327	0.389	-0.257175	Endogenous	FCGR2A/C
LITAF	0.998327	0.284	-0.261938	Endogenous	LITAF
CSF3R	0.998327	0.5	-0.263555	Endogenous	CSF3R
IL1B	0.998327	0.363	-0.266241	Endogenous	IL1B
CD79B	0.998327	0.346	-0.275099	Endogenous	CD79B
CCR7	0.998327	0.456	-0.275801	Endogenous	CCR7
IL7R	0.998327	0.462	-0.278689	Endogenous	IL7R
CXCR2	0.998327	0.463	-0.289706	Endogenous	CXCR2
CD22	0.998327	0.175	-0.289886	Endogenous	CD22
FCGRT	0.998327	0.338	-0.290458	Endogenous	FCGRT
CLEC7A	0.998327	0.193	-0.292879	Endogenous	CLEC7A
FCGR2A	0.998327	0.423	-0.293067	Endogenous	FCGR2A
IL16	0.998327	0.349	-0.299673	Endogenous	IL16
FCGR2B	0.998327	0.139	-0.301641	Endogenous	FCGR2B
TNFRSF13C	0.913964	0.0723	-0.309171	Endogenous	TNFRSF13C
CXCR1	0.998327	0.427	-0.312043	Endogenous	CXCR1
TNFRSF9	0.807008	0.056	-0.320772	Endogenous	TNFRSF9
IL1RAP	0.381467	0.00681	-0.326596	Endogenous	IL1RAP
CD19	0.381467	0.00611	-0.341855	Endogenous	CD19
SYK	0.998327	0.321	-0.346283	Endogenous	SYK
CSF2RB	0.998327	0.153	-0.347684	Endogenous	CSF2RB
CD97	0.998327	0.0978	-0.360911	Endogenous	CD97
PPBP	0.998327	0.514	-0.362767	Endogenous	PPBP
CD45RB	0.998327	0.261	-0.37218	Endogenous	CD45RB
PTAFR	0.722071	0.0452	-0.380466	Endogenous	PTAFR
GPR183	0.913964	0.0655	-0.385008	Endogenous	GPR183
CCR6	0.153884	0.00103	-0.39004	Endogenous	CCR6
TNFRSF10C	0.998327	0.298	-0.392288	Endogenous	TNFRSF10C
CD45R0	0.998327	0.289	-0.406423	Endogenous	CD45R0
CTSS	0.998327	0.251	-0.408232	Endogenous	CTSS
IL32	0.998327	0.237	-0.441429	Endogenous	IL32
CD45RA	0.998327	0.26	-0.517376	Endogenous	CD45RA
KLRB1	0.67118	0.0395	-0.562866	Endogenous	KLRB1
PECAM1	0.998327	0.161	-0.571733	Endogenous	PECAM1
ICAM3	0.998327	0.132	-0.584918	Endogenous	ICAM3
MS4A1	0.794873	0.0516	-0.611424	Endogenous	MS4A1

## Sheet: DEGs
ID	adj.P.Val	P.Value	logFC	Gene.Type	ORF
SERPING1	0.000285	6.39e-07	1.20217	Endogenous	SERPING1
CD163	0.153884	0.000885	0.696526	Endogenous	CD163
MX1	0.553311	0.0191	0.686078	Endogenous	MX1
CXCL10	0.946005	0.0804	0.673547	Endogenous	CXCL10
C1QB	0.333208	0.00373	0.662631	Endogenous	C1QB
IFITM1	0.998327	0.116	0.62586	Endogenous	IFITM1
BST2	0.613479	0.0302	0.596052	Endogenous	BST2
HLA-DQA1	0.998327	0.301	0.588817	Endogenous	HLA-DQA1
FKBP5	0.668564	0.0374	0.58657	Endogenous	FKBP5
CXCL9	0.913964	0.0736	0.584613	Endogenous	CXCL9
S100A8	0.913964	0.0725	0.568429	Endogenous	S100A8
IRAK2	0.6188	0.0332	0.566904	Endogenous	IRAK2
S100A9	0.998327	0.127	0.557602	Endogenous	S100A9
CEACAM6	0.998327	0.257	0.507702	Endogenous	CEACAM6
IL18R1	0.543975	0.0158	0.505866	Endogenous	IL18R1
NFKBIA	0.807008	0.0544	0.497713	Endogenous	NFKBIA
CD9	0.998327	0.379	0.46944	Endogenous	CD9
CLEC4E	0.998327	0.0993	0.463975	Endogenous	CLEC4E
FCER1G	0.998327	0.127	0.462754	Endogenous	FCER1G
IFIH1	0.491717	0.0121	0.457836	Endogenous	IFIH1
IL1RN	0.998327	0.132	0.454699	Endogenous	IL1RN
XBP1	0.998327	0.423	0.437356	Endogenous	XBP1
SOCS1	0.427111	0.00956	0.433788	Endogenous	SOCS1
TICAM1	0.427111	0.00952	0.427828	Endogenous	TICAM1
CD24	0.998327	0.398	0.426109	Endogenous	CD24
LTF	0.998327	0.103	0.424356	Endogenous	LTF
CEACAM1	0.308698	0.00276	0.419414	Endogenous	CEACAM1
IL18RAP	0.67118	0.0405	0.414465	Endogenous	IL18RAP
IRF7	0.553311	0.0216	0.413641	Endogenous	IRF7
FN1	0.998327	0.135	0.41075	Endogenous	FN1
GBP1	0.543975	0.0151	0.40932	Endogenous	GBP1
CDKN1A	0.553311	0.0225	0.401176	Endogenous	CDKN1A
CXCL11	0.998327	0.206	0.396205	Endogenous	CXCL11
CXCL2	0.998327	0.287	0.381131	Endogenous	CXCL2
C1QA	0.381467	0.00683	0.376417	Endogenous	C1QA
CCRL2	0.553311	0.0202	0.370491	Endogenous	CCRL2
ZBTB16	0.998327	0.228	0.368027	Endogenous	ZBTB16
STAT2	0.998327	0.159	0.364508	Endogenous	STAT2
CD99	0.998327	0.305	0.35881	Endogenous	CD99
CD59	0.998327	0.387	0.355688	Endogenous	CD59
CCL3	0.998327	0.204	0.353303	Endogenous	CCL3
IL18	0.998327	0.14	0.347774	Endogenous	IL18
TNFAIP3	0.998327	0.131	0.343619	Endogenous	TNFAIP3
ARG1	0.998327	0.216	0.340933	Endogenous	ARG1
GAPDH	0.998327	0.163	0.340388	Housekeeping	GAPDH
SRC	0.998327	0.163	0.339059	Endogenous	SRC
MSR1	0.998327	0.235	0.332498	Endogenous	MSR1
LILRB4	0.553311	0.0195	0.32011	Endogenous	LILRB4
CXCL12	0.613479	0.0295	0.315573	Endogenous	CXCL12
PML	0.998327	0.228	0.312691	Endogenous	PML
CEACAM8	0.998327	0.271	0.309283	Endogenous	CEACAM8
LGALS3	0.998327	0.466	0.301046	Endogenous	LGALS3
TAP1	0.998327	0.139	0.293163	Endogenous	TAP1
DEFB4A	0.998327	0.537	0.282824	Endogenous	DEFB4A
IL1R2	0.998327	0.239	0.282246	Endogenous	IL1R2
IFIT2	0.998327	0.296	0.268861	Endogenous	IFIT2
TLR2	0.998327	0.276	0.266791	Endogenous	TLR2
C2	0.998327	0.185	0.265517	Endogenous	C2
TNFAIP6	0.998327	0.153	0.262963	Endogenous	TNFAIP6
TNFSF10	0.998327	0.439	0.262538	Endogenous	TNFSF10
IL6ST	0.913964	0.0733	0.257485	Endogenous	IL6ST
PRDM1	0.998327	0.111	0.257383	Endogenous	PRDM1
ICAM1	0.613479	0.0308	0.25515	Endogenous	ICAM1
TLR5	0.613479	0.0316	0.252782	Endogenous	TLR5
STAT1	0.998327	0.383	0.249922	Endogenous	STAT1
IFI35	0.998327	0.345	0.244626	Endogenous	IFI35
MIF	0.998327	0.5	0.244512	Endogenous	MIF
MAPK14	0.998327	0.315	0.24105	Endogenous	MAPK14
MARCO	0.998327	0.232	0.239122	Endogenous	MARCO
FCGR1A/B	0.998327	0.362	0.233033	Endogenous	FCGR1A/B
IL1R1	0.998327	0.172	0.227573	Endogenous	IL1R1
ITGB1	0.998327	0.249	0.22685	Endogenous	ITGB1
GZMB	0.998327	0.469	0.224875	Endogenous	GZMB
C3	0.998327	0.644	0.223209	Endogenous	C3
LAIR1	0.998327	0.274	0.221405	Endogenous	LAIR1
TOLLIP	0.998327	0.268	0.221397	Endogenous	TOLLIP
IRAK1	0.998327	0.43	0.221144	Endogenous	IRAK1
LTB4R	0.998327	0.331	0.219925	Endogenous	LTB4R
TGFB1	0.998327	0.434	0.21949	Endogenous	TGFB1
APP	0.998327	0.623	0.217958	Endogenous	APP
CCL2	0.998327	0.435	0.212478	Endogenous	CCL2
BCL6	0.998327	0.495	0.207389	Endogenous	BCL6
TMEM173	0.998327	0.668	0.205178	Endogenous	TMEM173
CD276	0.998327	0.446	0.201421	Endogenous	CD276
CD274	0.998327	0.105	0.201291	Endogenous	CD274
CCND3	0.998327	0.377	0.19969	Endogenous	CCND3
CD83	0.998327	0.281	0.198879	Endogenous	CD83
HLA-DQB1	0.998327	0.641	0.196098	Endogenous	HLA-DQB1
TRAF4	0.998327	0.556	0.194953	Endogenous	TRAF4
JAK2	0.998327	0.348	0.193971	Endogenous	JAK2
C1QBP	0.998327	0.464	0.192842	Endogenous	C1QBP
PSMC2	0.998327	0.373	0.192727	Endogenous	PSMC2
IRAK3	0.998327	0.169	0.191598	Endogenous	IRAK3
BLNK	0.998327	0.371	0.187473	Endogenous	BLNK
MAPKAPK2	0.998327	0.507	0.187374	Endogenous	MAPKAPK2
CASP3	0.998327	0.345	0.18594	Endogenous	CASP3
LILRA6	0.998327	0.45	0.185097	Endogenous	LILRA6
IL4R	0.998327	0.499	0.183392	Endogenous	IL4R
CSF1	0.998327	0.094	0.182904	Endogenous	CSF1
KLRC2	0.998327	0.303	0.180188	Endogenous	KLRC2
IDO1	0.998327	0.575	0.178655	Endogenous	IDO1
GPI	0.998327	0.551	0.174633	Endogenous	GPI
GP1BB	0.998327	0.627	0.172344	Endogenous	GP1BB
IKBKB	0.998327	0.498	0.171116	Endogenous	IKBKB
POLR2A	0.998327	0.526	0.170993	Housekeeping	POLR2A
ITGAM	0.998327	0.568	0.167806	Endogenous	ITGAM
CR1	0.998327	0.632	0.16689	Endogenous	CR1
IRF4	0.998327	0.358	0.155133	Endogenous	IRF4
IL1RL1	0.998327	0.478	0.15502	Endogenous	IL1RL1
PRF1	0.998327	0.656	0.15486	Endogenous	PRF1
MYD88	0.998327	0.455	0.154262	Endogenous	MYD88
ADA	0.998327	0.184	0.153313	Endogenous	ADA
CCL4	0.998327	0.382	0.152379	Endogenous	CCL4
FCGR3A/B	0.998327	0.727	-0.15036	Endogenous	FCGR3A/B
NFATC2	0.998327	0.573	-0.151335	Endogenous	NFATC2
NCF4	0.998327	0.572	-0.15586	Endogenous	NCF4
PAX5	0.998327	0.367	-0.157772	Endogenous	PAX5
HLA-DPA1	0.998327	0.553	-0.158021	Endogenous	HLA-DPA1
MME	0.998327	0.608	-0.15929	Endogenous	MME
TNFRSF14	0.998327	0.603	-0.162291	Endogenous	TNFRSF14
ICAM2	0.998327	0.571	-0.162527	Endogenous	ICAM2
TYK2	0.998327	0.57	-0.16376	Endogenous	TYK2
TIGIT	0.998327	0.357	-0.163772	Endogenous	TIGIT
SLAMF1	0.998327	0.268	-0.164057	Endogenous	SLAMF1
PTGS2	0.998327	0.521	-0.166338	Endogenous	PTGS2
JAK1	0.998327	0.43	-0.1686	Endogenous	JAK1
BCL3	0.998327	0.268	-0.170371	Endogenous	BCL3
PTGER4	0.998327	0.123	-0.171306	Endogenous	PTGER4
HLA-DOB	0.998327	0.143	-0.171361	Endogenous	HLA-DOB
CD96	0.998327	0.479	-0.173095	Endogenous	CD96
CTSC	0.998327	0.505	-0.173509	Endogenous	CTSC
CD3D	0.998327	0.522	-0.174121	Endogenous	CD3D
ETS1	0.998327	0.569	-0.175257	Endogenous	ETS1
GZMK	0.998327	0.506	-0.177945	Endogenous	GZMK
ABCB1	0.998327	0.353	-0.178094	Endogenous	ABCB1
MAF	0.998327	0.333	-0.178175	Endogenous	MAF
CD247	0.998327	0.596	-0.182367	Endogenous	CD247
SELPLG	0.998327	0.486	-0.186536	Endogenous	SELPLG
IL21R	0.998327	0.259	-0.187071	Endogenous	IL21R
TAGAP	0.998327	0.46	-0.188438	Endogenous	TAGAP
HLA-DRA	0.998327	0.634	-0.188937	Endogenous	HLA-DRA
IFNAR2	0.998327	0.45	-0.193217	Endogenous	IFNAR2
MBP	0.998327	0.391	-0.196841	Endogenous	MBP
LILRA1	0.998327	0.38	-0.199019	Endogenous	LILRA1
CD44	0.998327	0.388	-0.20251	Endogenous	CD44
CSF1R	0.948648	0.0828	-0.206302	Endogenous	CSF1R
PSMB10	0.998327	0.565	-0.206916	Endogenous	PSMB10
PTPN6	0.998327	0.49	-0.207207	Endogenous	PTPN6
IL11RA	0.553311	0.0235	-0.207473	Endogenous	IL11RA
CEBPB	0.998327	0.347	-0.211497	Endogenous	CEBPB
LILRB3	0.998327	0.438	-0.212203	Endogenous	LILRB3
CD160	0.998327	0.227	-0.217629	Endogenous	CD160
MAP4K1	0.998327	0.253	-0.220761	Endogenous	MAP4K1
CX3CR1	0.998327	0.565	-0.221486	Endogenous	CX3CR1
TLR1	0.998327	0.268	-0.22223	Endogenous	TLR1
TRAF1	0.998327	0.0928	-0.223898	Endogenous	TRAF1
LILRA2	0.998327	0.537	-0.229589	Endogenous	LILRA2
CD4	0.998327	0.339	-0.230266	Endogenous	CD4
CD6	0.998327	0.314	-0.231385	Endogenous	CD6
CFP	0.998327	0.516	-0.232207	Endogenous	CFP
PTPRC_all	0.998327	0.497	-0.233898	Endogenous	PTPRC_all
CD3E	0.998327	0.511	-0.235639	Endogenous	CD3E
TNFRSF8	0.998327	0.156	-0.238483	Endogenous	TNFRSF8
CASP8	0.998327	0.246	-0.23936	Endogenous	CASP8
RAG1	0.998327	0.0895	-0.239521	Endogenous	RAG1
STAT6	0.998327	0.323	-0.241827	Endogenous	STAT6
HLA-DPB1	0.998327	0.349	-0.242848	Endogenous	HLA-DPB1
CD28	0.998327	0.314	-0.243314	Endogenous	CD28
CFD	0.998327	0.423	-0.244343	Endogenous	CFD
ZAP70	0.998327	0.512	-0.247476	Endogenous	ZAP70
KLRF1	0.921227	0.0763	-0.249661	Endogenous	KLRF1
ITLN1	0.998327	0.192	-0.253024	Endogenous	ITLN1
FCGR2A/C	0.998327	0.389	-0.257175	Endogenous	FCGR2A/C
LITAF	0.998327	0.284	-0.261938	Endogenous	LITAF
CSF3R	0.998327	0.5	-0.263555	Endogenous	CSF3R
IL1B	0.998327	0.363	-0.266241	Endogenous	IL1B
CD79B	0.998327	0.346	-0.275099	Endogenous	CD79B
CCR7	0.998327	0.456	-0.275801	Endogenous	CCR7
IL7R	0.998327	0.462	-0.278689	Endogenous	IL7R
CXCR2	0.998327	0.463	-0.289706	Endogenous	CXCR2
CD22	0.998327	0.175	-0.289886	Endogenous	CD22
FCGRT	0.998327	0.338	-0.290458	Endogenous	FCGRT
CLEC7A	0.998327	0.193	-0.292879	Endogenous	CLEC7A
FCGR2A	0.998327	0.423	-0.293067	Endogenous	FCGR2A
IL16	0.998327	0.349	-0.299673	Endogenous	IL16
FCGR2B	0.998327	0.139	-0.301641	Endogenous	FCGR2B
TNFRSF13C	0.913964	0.0723	-0.309171	Endogenous	TNFRSF13C
CXCR1	0.998327	0.427	-0.312043	Endogenous	CXCR1
TNFRSF9	0.807008	0.056	-0.320772	Endogenous	TNFRSF9
IL1RAP	0.381467	0.00681	-0.326596	Endogenous	IL1RAP
CD19	0.381467	0.00611	-0.341855	Endogenous	CD19
SYK	0.998327	0.321	-0.346283	Endogenous	SYK
CSF2RB	0.998327	0.153	-0.347684	Endogenous	CSF2RB
CD97	0.998327	0.0978	-0.360911	Endogenous	CD97
PPBP	0.998327	0.514	-0.362767	Endogenous	PPBP
CD45RB	0.998327	0.261	-0.37218	Endogenous	CD45RB
PTAFR	0.722071	0.0452	-0.380466	Endogenous	PTAFR
GPR183	0.913964	0.0655	-0.385008	Endogenous	GPR183
CCR6	0.153884	0.00103	-0.39004	Endogenous	CCR6
TNFRSF10C	0.998327	0.298	-0.392288	Endogenous	TNFRSF10C
CD45R0	0.998327	0.289	-0.406423	Endogenous	CD45R0
CTSS	0.998327	0.251	-0.408232	Endogenous	CTSS
IL32	0.998327	0.237	-0.441429	Endogenous	IL32
CD45RA	0.998327	0.26	-0.517376	Endogenous	CD45RA
KLRB1	0.67118	0.0395	-0.562866	Endogenous	KLRB1
PECAM1	0.998327	0.161	-0.571733	Endogenous	PECAM1
ICAM3	0.998327	0.132	-0.584918	Endogenous	ICAM3
MS4A1	0.794873	0.0516	-0.611424	Endogenous	MS4A1

## Sheet: Sheet4
#node1	node2
AKT1	APC
AKT1	LRP6
AKT1	AXIN1
AKT1	TP53
AKT1	AXIN2
AKT1	GSK3B
AKT1	MAPT
AKT1	CTNNB1
AKT1	CSNK1A1
AKT1	MYC
APC	AKT1
APC	MYC
APC	TP53
APC	LRP6
APC	CSNK1A1
APC	AXIN2
APC	AXIN1
APC	GSK3B
APC	CTNNB1
AXIN1	APC
AXIN1	LRP6
AXIN1	TP53
AXIN1	AXIN2
AXIN1	AKT1
AXIN1	MYC
AXIN1	CTNNB1
AXIN1	GSK3B
AXIN1	CSNK1A1
AXIN2	APC
AXIN2	LRP6
AXIN2	AXIN1
AXIN2	TP53
AXIN2	AKT1
AXIN2	MYC
AXIN2	CSNK1A1
AXIN2	GSK3B
AXIN2	CTNNB1
CSNK1A1	APC
CSNK1A1	LRP6
CSNK1A1	AXIN1
CSNK1A1	TP53
CSNK1A1	AXIN2
CSNK1A1	GSK3B
CSNK1A1	MAPT
CSNK1A1	CTNNB1
CSNK1A1	AKT1
CSNK1A1	MYC
CTNNB1	APC
CTNNB1	LRP6
CTNNB1	AXIN1
CTNNB1	TP53
CTNNB1	AXIN2
CTNNB1	GSK3B
CTNNB1	MAPT
CTNNB1	MYC
CTNNB1	AKT1
CTNNB1	CSNK1A1
GSK3B	APC
GSK3B	LRP6
GSK3B	AXIN1
GSK3B	TP53
GSK3B	AXIN2
GSK3B	AKT1
GSK3B	MYC
GSK3B	CSNK1A1
GSK3B	MAPT
GSK3B	CTNNB1
LRP6	APC
LRP6	AKT1
LRP6	MYC
LRP6	AXIN2
LRP6	CSNK1A1
LRP6	GSK3B
LRP6	CTNNB1
LRP6	AXIN1
MAPT	TP53
MAPT	GSK3B
MAPT	CSNK1A1
MAPT	CTNNB1
MAPT	AKT1
MYC	APC
MYC	LRP6
MYC	AXIN1
MYC	TP53
MYC	AXIN2
MYC	GSK3B
MYC	CTNNB1
MYC	CSNK1A1
MYC	AKT1
TP53	APC
TP53	AXIN1
TP53	AXIN2
TP53	MAPT
TP53	CTNNB1
TP53	MYC
TP53	AKT1
TP53	CSNK1A1
TP53	GSK3B

## Sheet: EnrichedPathways
Enriched Pathways	p-values
KEGG_04010_MAPK_signaling_pathway	5.42101e-20
KEGG_04060_Cytokine-cytokine_receptor_interaction	5.42101e-20
KEGG_04064_NF-kappa_B_signaling_pathway_-_Homo_sapiens_(human)	5.42101e-20
KEGG_04145_Phagosome	5.42101e-20
KEGG_04151_PI3K-Akt_signaling_pathway_-_Homo_sapiens_(human)	5.42101e-20
KEGG_04210_Apoptosis	5.42101e-20
KEGG_04380_Osteoclast_differentiation	5.42101e-20
KEGG_04514_Cell_adhesion_molecules_(CAMs)	5.42101e-20
KEGG_04612_Antigen_processing_and_presentation	5.42101e-20
KEGG_04620_Toll-like_receptor_signaling_pathway	5.42101e-20
KEGG_04630_Jak-STAT_signaling_pathway	5.42101e-20
KEGG_04640_Hematopoietic_cell_lineage	5.42101e-20
KEGG_04650_Natural_killer_cell_mediated_cytotoxicity	5.42101e-20
KEGG_04660_T_cell_receptor_signaling_pathway	5.42101e-20
KEGG_04662_B_cell_receptor_signaling_pathway	5.42101e-20
KEGG_04668_TNF_signaling_pathway_-_Homo_sapiens_(human)	5.42101e-20
KEGG_04068_FoxO_signaling_pathway_-_Homo_sapiens_(human)	4.11032e-19
KEGG_04722_Neurotrophin_signaling_pathway	4.11032e-19
KEGG_04917_Prolactin_signaling_pathway	1.56192e-16
KEGG_04920_Adipocytokine_signaling_pathway	1.56192e-16
KEGG_04015_Rap1_signaling_pathway_-_Homo_sapiens_(human)	4.77948e-14
KEGG_04810_Regulation_of_actin_cytoskeleton	4.77948e-14
KEGG_04014_Ras_signaling_pathway_-_Homo_sapiens_(human)	7.64716e-13
KEGG_04066_HIF-1_signaling_pathway_-_Homo_sapiens_(human)	7.64716e-13
KEGG_04670_Leukocyte_transendothelial_migration	7.64716e-13
KEGG_04071_Sphingolipid_signaling_pathway_-_Homo_sapiens_(human)	1.14708e-11
KEGG_04510_Focal_adhesion	1.14708e-11
KEGG_04621_NOD-like_receptor_signaling_pathway	1.14708e-11
KEGG_04550_Signaling_pathways_regulating_pluripotency_of_stem_cells	1.6059e-10
KEGG_04610_Complement_and_coagulation_cascades	1.6059e-10
KEGG_04622_RIG-I-like_receptor_signaling_pathway	1.6059e-10
KEGG_04370_VEGF_signaling_pathway	2.08768e-09
KEGG_04611_Platelet_activation	2.08768e-09
KEGG_04672_Intestinal_immune_network_for_IgA_production	1.58292e-08
KEGG_04664_Fc_epsilon_RI_signaling_pathway	2.50521e-08
KEGG_04115_p53_signaling_pathway	2.75573e-07
KEGG_04360_Axon_guidance	2.75573e-07
KEGG_04919_Thyroid_hormone_signaling_pathway	2.75573e-07
KEGG_04921_Oxytocin_signaling_pathway	2.75573e-07
KEGG_04012_ErbB_signaling_pathway	2.75573e-06
KEGG_04072_Phospholipase_D_signaling_pathway_-_Homo_sapiens_(human)	2.48016e-05
KEGG_04310_Wnt_signaling_pathway	2.48016e-05
KEGG_04350_TGF-beta_signaling_pathway	2.48016e-05
KEGG_04392_Hippo_Signaling_Pathway	2.48016e-05
KEGG_04520_Adherens_junction	2.48016e-05
KEGG_04750_Inflammatory_mediator_regulation_of_TRP_channels	2.48016e-05
KEGG_04623_Cytosolic_DNA-sensing_pathway	0.000108272
KEGG_04110_Cell_cycle	0.000198413
KEGG_04512_ECM-receptor_interaction	0.000198413
KEGG_04912_GnRH_signaling_pathway	0.000198413
KEGG_03050_Proteasome	0.00138889
KEGG_04024_cAMP_signaling_pathway_-_Homo_sapiens_(human)	0.00138889
KEGG_04211_Longevity_regulating_pathway	0.00138889
KEGG_04540_Gap_junction	0.00138889
KEGG_04666_Fc_gamma_R-mediated_phagocytosis	0.00138889
KEGG_04910_Insulin_signaling_pathway	0.00138889
KEGG_04915_Estrogen_signaling_pathway	0.00138889
KEGG_00230_Purine_metabolism	0.00833333
KEGG_04022_cGMP-PKG_signaling_pathway_-_Homo_sapiens_(human)	0.00833333
KEGG_04120_Ubiquitin_mediated_proteolysis	0.00833333
KEGG_04140_Regulation_of_autophagy	0.00833333
KEGG_04141_Protein_processing_in_endoplasmic_reticulum	0.00833333
KEGG_04371_Apelin_signaling_pathway_-_Homo_sapiens_(human)	0.00833333
KEGG_04916_Melanogenesis	0.00833333
KEGG_04020_Calcium_signaling_pathway	0.0416667
KEGG_04080_Neuroactive_ligand-receptor_interaction	0.0416667
KEGG_04144_Endocytosis	0.0416667
KEGG_04261_Adrenergic_signaling_in_cardiomyocytes	0.0416667
KEGG_04530_Tight_junction	0.0416667
KEGG_04723_Retrograde_endocannabinoid_signaling	0.0416667
KEGG_04914_Progesterone-mediated_oocyte_maturation	0.0416667

## Sheet: DockingOutcome
	NDUFS1	SRSF6	HECTD1	CBX3	DDX17
Apigenin	-7.03	-7.05	-7.26	-6.88	-7.15
Querecetin	-7.35	-6.63	-7.61	-7.29	-7.31
Resveratrol	-7.05	-6.73	-7.54	-6.86	-7.52

## Sheet: GSE47962_mock_BatSRB
ID	adj.P.Val	P.Value	logFC	Gene.symbol	Gene.title
A_24_P119745	0.0011	6.39e-05	3.16323	FN1	fibronectin 1
A_24_P85539	0.00184	0.00013	2.94403	FN1	fibronectin 1
A_24_P334130	0.00241	0.000192	2.45457	FN1	fibronectin 1
A_23_P56746	0.00371	0.000351	2.06612	FAP	fibroblast activation protein alpha
A_32_P51237	0.00331	0.000297	1.9901	KANK4	KN motif and ankyrin repeat domains 4
A_24_P264943	0.00159	0.000107	1.97679	COMP	cartilage oligomeric matrix protein
A_24_P299318	0.000155	4.33e-06	1.97448	FAM101B	family with sequence similarity 101 member B
A_24_P277934	0.00106	6.04e-05	1.97397	COL1A2	collagen type I alpha 2 chain
A_23_P90436	0.00174	0.00012	1.95675	COMP	cartilage oligomeric matrix protein
A_23_P161218	0.0016	0.000108	1.93835	ANKRD1	ankyrin repeat domain 1
A_23_P87013	0.00114	6.72e-05	1.916	TAGLN	transgelin
A_23_P7642	0.00156	0.000104	1.88233	SPARC	secreted protein acidic and cysteine rich
A_23_P374082	0.001	5.65e-05	1.86556	ADAM19	ADAM metallopeptidase domain 19
A_24_P181254	0.0288	0.00568	1.85718	OLFM4	olfactomedin 4
A_24_P788772	0.000535	2.34e-05	1.79981
A_24_P354689	0.000632	2.97e-05	1.77479	SPOCK1	sparc/osteonectin, cwcv and kazal-like domains proteoglycan (testican) 1
A_23_P87011	0.00147	9.63e-05	1.74315	TAGLN	transgelin
A_23_P92730	0.0054	0.000591	1.69876	HSPB3	heat shock protein family B (small) member 3
A_23_P205031	0.00132	8.23e-05	1.65571	COL4A2	collagen type IV alpha 2 chain
A_23_P39955	0.00383	0.000367	1.63833	ACTG2	actin, gamma 2, smooth muscle, enteric
A_23_P302787	0.000164	4.71e-06	1.63356	LINC01116	long intergenic non-protein coding RNA 1116
A_24_P318656	0.000711	3.48e-05	1.6241	ITGB3	integrin subunit beta 3
A_32_P24376	0.00901	0.00118	1.57724	KRTAP2-3	keratin associated protein 2-3
A_32_P148146	0.00269	0.000223	1.57523
A_23_P210425	0.000192	5.79e-06	1.57143	MYL9	myosin light chain 9
A_23_P125233	0.0201	0.00352	1.52966	CNN1	calponin 1
A_23_P161194	0.000279	9.7e-06	1.51658	VIM	vimentin
A_23_P38519	0.000695	3.37e-05	1.50998	ITGB3	integrin subunit beta 3
A_23_P40415	0.00449	0.000454	1.50841	ADAMTS5	ADAM metallopeptidase with thrombospondin type 1 motif 5
A_24_P315256	0.000213	6.72e-06	1.50817
A_23_P68759	0.00424	0.000422	1.5048	TFF1	trefoil factor 1
A_24_P398370	0.00164	0.000111	1.49265
A_23_P386268	0.00259	0.000212	1.47917	C4orf26	chromosome 4 open reading frame 26
A_23_P161190	0.000476	1.97e-05	1.47348	VIM	vimentin
A_23_P142533	0.013	0.00194	1.45738	COL3A1	collagen type III alpha 1 chain
A_23_P406341	0.000181	5.33e-06	1.44228	AFAP1L2	actin filament associated protein 1 like 2
A_24_P355649	0.00037	1.4e-05	1.43539	FLI1	Fli-1 proto-oncogene, ETS transcription factor
A_32_P4018	0.00219	0.000167	1.43505	ROR1	receptor tyrosine kinase like orphan receptor 1
A_24_P13024	0.000773	3.92e-05	1.43085	SLC16A12	solute carrier family 16 member 12
A_23_P14083	0.00238	0.000189	1.4302	AMIGO2	adhesion molecule with Ig like domain 2
A_23_P206212	0.000596	2.71e-05	1.39688	THBS1	thrombospondin 1
A_23_P111995	0.00018	5.3e-06	1.39611	LOXL2	lysyl oxidase like 2
A_23_P12363	0.00416	0.000409	1.38535	ROR1	receptor tyrosine kinase like orphan receptor 1
A_23_P150609	0.000129	3.38e-06	1.3824	IGF2	insulin like growth factor 2
A_32_P134764	0.000125	3.19e-06	1.37674	CDH6	cadherin 6
A_23_P349966	0.00452	0.000459	1.35675	TMEM130	transmembrane protein 130
A_23_P501538	0.00284	0.00024	1.3471	HOXA3	homeobox A3
A_23_P65240	0.00167	0.000114	1.34469	COL4A1	collagen type IV alpha 1 chain
A_23_P164650	0.00122	7.39e-05	1.34167	APOE	apolipoprotein E
A_23_P127911	0.000123	3.12e-06	1.3408	PAMR1	peptidase domain containing associated with muscle regeneration 1
A_24_P18137	0.00527	0.00057	1.33831	NEFL	neurofilament, light polypeptide
A_23_P252052	0.000788	4.01e-05	1.33122	FILIP1L	filamin A interacting protein 1 like
A_32_P148322	0.000167	4.8e-06	1.33096	CDH6	cadherin 6
A_24_P319923	0.00235	0.000185	1.31622	MYLK	myosin light chain kinase
A_23_P122924	0.000775	3.94e-05	1.30744	INHBA	inhibin beta A subunit
A_24_P33770	0.000258	8.73e-06	1.30456	AFAP1L2	actin filament associated protein 1 like 2
A_32_P97169	0.00213	0.000161	1.299	GPC6	glypican 6
A_23_P133408	0.00126	7.76e-05	1.2987	CSF2	colony stimulating factor 2
A_23_P127584	0.0213	0.00379	1.29467	NNMT	nicotinamide N-methyltransferase
A_23_P21976	0.000239	7.9e-06	1.28705	CSPG4	chondroitin sulfate proteoglycan 4
A_23_P123234	0.0039	0.000375	1.28633
A_23_P218144	0.000131	3.46e-06	1.27635	LTBP2	latent transforming growth factor beta binding protein 2
A_24_P32151	0.000908	4.9e-05	1.26291	FAM101B	family with sequence similarity 101 member B
A_23_P84063	0.0043	0.000428	1.26269	NTM	neurotrimin
A_23_P78405	0.00082	4.23e-05	1.25773	LIPG	lipase G, endothelial type
A_23_P28815	0.00167	0.000114	1.24779	CYP24A1	cytochrome P450 family 24 subfamily A member 1
A_24_P727884	0.000119	2.99e-06	1.24114	KIAA1549L	KIAA1549 like
A_24_P935986	5.61e-05	1.15e-06	1.24101	BCAT1	branched chain amino acid transaminase 1
A_24_P535256	0.00249	0.0002	1.24096	INHBA	inhibin beta A subunit
A_24_P85300	0.000714	3.51e-05	1.22283	HEG1	heart development protein with EGF like domains 1
A_32_P167212	0.00161	0.000109	1.2208
A_23_P143817	0.00342	0.000312	1.21724	MYLK	myosin light chain kinase
A_23_P163787	0.000212	6.62e-06	1.21522	MMP2	matrix metallopeptidase 2
A_24_P125469	0.00201	0.000149	1.21293	LIPG	lipase G, endothelial type
A_24_P596251	0.00483	0.000507	1.21269
A_24_P177553	5.82e-14	6.29e-17	1.20914
A_24_P409971	0.0135	0.00205	1.20553	NEXN	nexilin F-actin binding protein
A_32_P13056	0.000491	2.06e-05	1.19909
A_24_P299474	8.23e-08	5.62e-10	1.19827	TENM2	teneurin transmembrane protein 2
A_23_P99802	0.000814	4.18e-05	1.1958	FLRT2	fibronectin leucine rich transmembrane protein 2
A_23_P405129	0.00301	0.00026	1.19318	LTBP2	latent transforming growth factor beta binding protein 2
A_23_P214897	0.000612	2.84e-05	1.18638	AKAP12	A-kinase anchoring protein 12
A_23_P214011	0.000218	6.96e-06	1.16871	CDH6	cadherin 6
A_32_P166693	0.000144	3.95e-06	1.16521	HEG1	heart development protein with EGF like domains 1
A_24_P687	0.00013	3.41e-06	1.15832	CDH6	cadherin 6
A_23_P47148	0.00639	0.000744	1.15427	NOX4	NADPH oxidase 4
A_24_P273726	0.00213	0.000161	1.14478	MSRB3	methionine sulfoxide reductase B3
A_24_P383609	0.000728	3.61e-05	1.12336	NANOS1	nanos C2HC-type zinc finger 1
A_23_P340698	0.0132	0.00198	1.12216	MMP12	matrix metallopeptidase 12
A_23_P344673	0.000475	1.96e-05	1.10484	HAGLR	HOXD antisense growth-associated long non-coding RNA
A_32_P152437	0.000349	1.3e-05	1.10325	AKAP12	A-kinase anchoring protein 12
A_23_P204208	0.00747	0.000924	1.1025	KLRD1	killer cell lectin like receptor D1
A_23_P33196	0.000962	5.33e-05	1.10066	COL5A2	collagen type V alpha 2 chain
A_23_P144959	0.00675	0.000803	1.10057	VCAN	versican
A_24_P413126	0.00181	0.000128	1.09633	PMEPA1	prostate transmembrane protein, androgen induced 1
A_32_P201434	0.0356	0.00755	1.09489
A_24_P111106	0.00367	0.000345	1.09178	FGF1	fibroblast growth factor 1
A_24_P929003	0.00463	0.000477	1.09123	ITGB3	integrin subunit beta 3
A_23_P106389	0.00352	0.000325	1.08546	SEMA7A	semaphorin 7A (John Milton Hagen blood group)
A_24_P260101	0.0225	0.0041	1.08196	MME	membrane metallo-endopeptidase
A_23_P113777	0.00278	0.000233	1.08131	ITGBL1	integrin subunit beta like 1
A_24_P52697	7.7e-05	1.71e-06	1.07934	H19	H19, imprinted maternally expressed transcript (non-protein coding)
A_23_P150316	0.0161	0.0026	1.0774	MMP12	matrix metallopeptidase 12
A_23_P254522	0.00071	3.47e-05	1.07331	COL4A4	collagen type IV alpha 4 chain
A_23_P132619	0.00282	0.000238	1.07022	OXTR	oxytocin receptor
A_32_P171043	0.000814	4.18e-05	1.06899	CCBE1	collagen and calcium binding EGF domains 1
A_23_P10391	0.000882	4.68e-05	1.06866	COL5A2	collagen type V alpha 2 chain
A_24_P739344	0.002	0.000147	1.06437	NOX4	NADPH oxidase 4
A_23_P111311	0.000692	3.36e-05	1.06408	AKAP12	A-kinase anchoring protein 12
A_23_P95802	5.91e-05	1.23e-06	1.06336	CNTNAP2	contactin associated protein-like 2
A_32_P16204	0.000208	6.45e-06	1.05805	LINC01116	long intergenic non-protein coding RNA 1116
A_32_P72351	0.002	0.000148	1.05381	FAM20C	family with sequence similarity 20 member C
A_24_P236235	0.00115	6.78e-05	1.04692	FLRT2	fibronectin leucine rich transmembrane protein 2
A_32_P42224	0.000773	3.91e-05	1.03893
A_24_P314477	0.00312	0.000273	1.02946	TUBB2B	tubulin beta 2B class IIb
A_24_P339944	0.00177	0.000124	1.02469	PDGFB	platelet derived growth factor subunit B
A_24_P532232	0.0147	0.00229	1.02235	CREB5	cAMP responsive element binding protein 5
A_23_P64121	0.00334	0.000301	1.02098	KIAA1549L	KIAA1549 like
A_23_P35995	0.00289	0.000246	1.01744	CLMP	CXADR like membrane protein
A_23_P1029	0.00359	0.000335	1.01677	MFAP2	microfibrillar associated protein 2
A_23_P213336	0.0102	0.00139	1.0084	FGF1	fibroblast growth factor 1
A_23_P19030	4.49e-05	8.53e-07	1.00355	ARSI	arylsulfatase family member I
A_23_P4494	0.00026	8.88e-06	1.00247	DSC2	desmocollin 2
A_23_P72096	0.00184	0.000131	1.0015	IL1A	interleukin 1 alpha
A_24_P142118	0.00108	6.18e-05	1.00058	THBS1	thrombospondin 1
A_23_P311895	0.00132	8.22e-05	0.99621	CLIC5	chloride intracellular channel 5
A_23_P146946	0.00087	4.59e-05	0.992293	CST6	cystatin E/M
A_23_P166459	0.000349	1.3e-05	0.989384	LGALS1	galectin 1
A_32_P194312	2.88e-05	4.99e-07	0.981101	SDK2	sidekick cell adhesion molecule 2
A_23_P127565	0.000127	3.27e-06	0.981066	LAYN	layilin
A_23_P96383	0.00504	0.000536	0.980063	SRPX	sushi repeat containing protein, X-linked
A_23_P353524	7.25e-05	1.6e-06	0.977357	IVL	involucrin
A_24_P123385	0.000138	3.73e-06	0.971494	MAP1B	microtubule associated protein 1B
A_23_P431388	0.0119	0.00173	0.965283	SPOCD1	SPOC domain containing 1
A_23_P42575	0.00044	1.79e-05	0.964719	CALD1	caldesmon 1
A_32_P153195	0.000129	3.35e-06	0.964697	BEAN1	brain expressed, associated with NEDD4, 1
A_24_P291814	1.16e-06	1.13e-08	0.964387	COL12A1	collagen type XII alpha 1 chain
A_23_P416774	0.00178	0.000125	0.963537	CLIC5	chloride intracellular channel 5
A_23_P92929	0.0238	0.00441	0.961345	PRR16	proline rich 16
A_32_P90812	2.45e-05	4.1e-07	0.959918	KCNJ5	potassium voltage-gated channel subfamily J member 5
A_23_P132956	0.00315	0.000277	0.956453	UCHL1	ubiquitin C-terminal hydrolase L1
A_32_P92642	0.0122	0.00179	0.955855
A_32_P405759	0.0101	0.00138	0.952006	COL22A1	collagen type XXII alpha 1 chain
A_24_P296808	0.00245	0.000196	0.950229	PNMAL1	paraneoplastic Ma antigen family like 1
A_24_P356930	0.00179	0.000125	0.948401	CYP24A1	cytochrome P450 family 24 subfamily A member 1
A_23_P73787	0.00877	0.00114	0.948106	NUDT10	nudix hydrolase 10
A_23_P154605	0.000738	3.68e-05	0.947288	SULF2	sulfatase 2
A_23_P1102	0.14	0.0503	0.946976	ACTA1	actin, alpha 1, skeletal muscle
A_24_P124624	0.000622	2.9e-05	0.94553	OLR1	oxidized low density lipoprotein receptor 1
A_24_P879740	0.000113	2.76e-06	0.944586	MAP1B	microtubule associated protein 1B
A_32_P39944	0.00172	0.000118	0.944402
A_23_P202927	4.67e-05	9.07e-07	0.935728	KCNJ5	potassium voltage-gated channel subfamily J member 5
A_23_P100711	0.0083	0.00106	0.935249	PMP22	peripheral myelin protein 22
A_23_P65518	0.0372	0.00803	0.934684	DACT1	dishevelled binding antagonist of beta catenin 1
A_32_P226525	0.00322	0.000286	0.933682
A_23_P214168	1.69e-05	2.63e-07	0.932309	COL12A1	collagen type XII alpha 1 chain
A_23_P212061	0.00335	0.000303	0.930372	MME	membrane metallo-endopeptidase
A_24_P921366	0.00126	7.69e-05	0.928374	CALD1	caldesmon 1
A_24_P817863	0.00154	0.000103	0.927645	UNC80	unc-80 homolog, NALCN activator
A_23_P118158	0.0275	0.00536	0.925315	HS3ST2	heparan sulfate-glucosamine 3-sulfotransferase 2
A_32_P181638	0.000696	3.38e-05	0.923194	BVES	blood vessel epicardial substance
A_24_P904845	0.00315	0.000278	0.92156
A_23_P301521	0.00173	0.000119	0.920521	KIAA1462	KIAA1462
A_23_P26847	0.000636	3e-05	0.920104	SOX9	SRY-box 9
A_23_P10025	0.00155	0.000103	0.920082	NELL2	neural EGFL like 2
A_23_P119202	0.00478	0.000499	0.918799	CD70	CD70 molecule
A_23_P422212	0.00116	6.85e-05	0.917767	SLC35F3	solute carrier family 35 member F3
A_23_P164958	0.0107	0.00149	0.914427	CCDC8	coiled-coil domain containing 8
A_24_P918137	1.96e-07	1.45e-09	0.908961
A_24_P139899	0.00662	0.00078	0.905679	SYT11	synaptotagmin 11
A_32_P198731	0.000441	1.79e-05	0.903707	NEURL1B	neuralized E3 ubiquitin protein ligase 1B
A_23_P64404	0.00142	9.09e-05	0.902637	FADS3	fatty acid desaturase 3
A_32_P437004	0.00653	0.000768	0.902289	XG	Xg blood group
A_23_P133656	0.00146	9.5e-05	0.898651	LAMA4	laminin subunit alpha 4
A_23_P202327	0.000751	3.77e-05	0.897062	ADAM12	ADAM metallopeptidase domain 12
A_23_P79518	0.00486	0.00051	0.892753	IL1B	interleukin 1 beta
A_23_P57089	0.00417	0.000411	0.892566	PMEPA1	prostate transmembrane protein, androgen induced 1
A_23_P210100	0.000689	3.34e-05	0.886619	CYP26B1	cytochrome P450 family 26 subfamily B member 1
A_23_P209449	0.000354	1.33e-05	0.886024	FZD7	frizzled class receptor 7
A_32_P217261	0.00182	0.000129	0.885228
A_32_P218734	0.0016	0.000108	0.883204	COL5A2	collagen type V alpha 2 chain
A_32_P117016	0.00189	0.000135	0.883067	ALDH1L2	aldehyde dehydrogenase 1 family member L2
A_24_P39508	0.000689	3.33e-05	0.880572	CMTM3	CKLF like MARVEL transmembrane domain containing 3
A_24_P347378	0.00591	0.00067	0.880039	ALOX5AP	arachidonate 5-lipoxygenase activating protein
A_23_P69179	0.000131	3.45e-06	0.879	P3H2	prolyl 3-hydroxylase 2
A_23_P139881	0.000571	2.55e-05	0.875667	CCND2	cyclin D2
A_23_P123402	0.00026	8.86e-06	0.871969	TRIM55	tripartite motif containing 55
A_23_P77493	0.00397	0.000383	0.871361	TUBB3	tubulin beta 3 class III
A_23_P33123	0.000173	5.03e-06	0.86858	SPOCK3	sparc/osteonectin, cwcv and kazal-like domains proteoglycan (testican) 3
A_23_P104275	0.00664	0.000783	0.868136	SLC16A12	solute carrier family 16 member 12
A_24_P371281	0.0725	0.02	0.8662	SLC35G2	solute carrier family 35 member G2
A_23_P111766	5.79e-05	1.19e-06	0.865711
A_23_P302005	0.000639	3.03e-05	0.865372	STON1	stonin 1
A_23_P110319	3.1e-05	5.49e-07	0.861059	CWH43	cell wall biogenesis 43 C-terminal homolog
A_23_P110791	0.00201	0.000149	0.859073	CSF1R	colony stimulating factor 1 receptor
A_23_P56197	0.000204	6.27e-06	0.858561	CRLF1	cytokine receptor like factor 1
A_24_P270044	0.000247	8.21e-06	0.855144	CLMP	CXADR like membrane protein
A_23_P140928	0.000962	5.34e-05	0.854827	TMC7	transmembrane channel like 7
A_24_P347411	0.084	0.0245	0.854601	POSTN	periostin
A_32_P39669	0.001	5.62e-05	0.853838
A_32_P198179	0.00877	0.00114	0.85379
A_23_P21092	0.0109	0.00153	0.853787	CALB2	calbindin 2
A_23_P76136	0.0109	0.00153	0.853586	TSPAN11	tetraspanin 11
A_23_P110052	0.00201	0.000149	0.8535	FOXL2	forkhead box L2
A_23_P88865	0.00166	0.000113	0.850102	CMTM3	CKLF like MARVEL transmembrane domain containing 3
A_23_P158675	0.000141	3.85e-06	0.849166	KCNMB2	potassium calcium-activated channel subfamily M regulatory beta subunit 2
A_23_P152305	0.0539	0.0133	0.848549	CDH11	cadherin 11
A_23_P120243	0.00158	0.000106	0.848543	HOXD1	homeobox D1
A_23_P351667	0.00579	0.000649	0.846988	ADAM23	ADAM metallopeptidase domain 23
A_24_P212389	0.00325	0.000289	0.84622	MSRB3	methionine sulfoxide reductase B3
A_32_P300427	0.0382	0.00833	0.842237	APCDD1L	APC down-regulated 1 like
A_23_P206018	0.000996	5.58e-05	0.842084	TPM1	tropomyosin 1 (alpha)
A_23_P201636	0.000414	1.63e-05	0.838102	LAMC2	laminin subunit gamma 2
A_23_P207520	0.0753	0.021	0.83762	COL1A1	collagen type I alpha 1 chain
A_23_P72487	0.00296	0.000254	0.831493	XG	Xg blood group
A_23_P24104	0.000114	2.8e-06	0.831055	PLAU	plasminogen activator, urokinase
A_23_P202881	0.00174	0.000121	0.828649	FEZ1	fasciculation and elongation protein zeta 1
A_24_P236935	0.000314	1.14e-05	0.828203	KLK6	kallikrein related peptidase 6
A_23_P163087	0.00126	7.72e-05	0.826589	NID2	nidogen 2
A_24_P108262	1.65e-05	2.56e-07	0.826486	SDK2	sidekick cell adhesion molecule 2
A_24_P931744	8.82e-08	6.07e-10	0.825485	STBD1	starch binding domain 1
A_23_P167812	0.000213	6.71e-06	0.825407	RBM24	RNA binding motif protein 24
A_23_P315571	0.00058	2.62e-05	0.824393	RFTN1	raftlin, lipid raft linker 1
A_23_P134835	0.00468	0.000484	0.822955	CSGALNACT1	chondroitin sulfate N-acetylgalactosaminyltransferase 1
A_24_P44462	0.000833	4.36e-05	0.822206	TPM1	tropomyosin 1 (alpha)
A_32_P64286	0.000176	5.14e-06	0.821954	SIX3-AS1	SIX3 antisense RNA 1
A_23_P131308	6.94e-05	1.52e-06	0.820282	CYP27A1	cytochrome P450 family 27 subfamily A member 1
A_23_P2543	0.0582	0.0147	0.819583	CUX2	cut like homeobox 2
A_32_P69136	0.00243	0.000193	0.817364
A_24_P158089	0.0145	0.00225	0.814981	SERPINE1	serpin family E member 1
A_23_P4953	0.0155	0.00246	0.81106	PNMAL1	paraneoplastic Ma antigen family like 1
A_23_P391586	0.00293	0.000251	0.810533	TPM1	tropomyosin 1 (alpha)
A_24_P627874	0.0487	0.0116	0.808675
A_23_P302470	0.011	0.00155	0.807865	SULT1B1	sulfotransferase family 1B member 1
A_32_P59355	0.0598	0.0153	0.807527
A_23_P140748	0.00043	1.72e-05	0.807179	NDRG4	NDRG family member 4
A_24_P13041	0.00357	0.000331	0.807057	RTKN2	rhotekin 2
A_23_P366035	5.83e-05	1.21e-06	0.80679	ABHD12B	abhydrolase domain containing 12B
A_24_P250922	0.0132	0.00198	0.805589	PTGS2	prostaglandin-endoperoxide synthase 2
A_23_P139682	0.000266	9.16e-06	0.805504	PZP	PZP, alpha-2-macroglobulin like
A_23_P87528	0.00861	0.00111	0.805226	BCAT1	branched chain amino acid transaminase 1
A_24_P915376	0.000201	6.14e-06	0.80419	TNNT3	troponin T3, fast skeletal type
A_23_P319549	0.03	0.006	0.803498	CFAP57	cilia and flagella associated protein 57
A_23_P99515	0.056	0.014	0.802453	MEDAG	mesenteric estrogen dependent adipogenesis
A_23_P364024	0.00497	0.000526	0.801919	GLIPR1	GLI pathogenesis related 1
A_23_P304110	1.86e-05	2.96e-07	0.801731	SOWAHA	sosondowah ankyrin repeat domain family member A
A_23_P141055	6.42e-05	1.38e-06	0.801649	TGFB1I1	transforming growth factor beta 1 induced transcript 1
A_24_P270235	7.25e-05	1.6e-06	0.800326	CCND2	cyclin D2
A_23_P344555	0.00562	0.000623	0.799918	NEDD9	neural precursor cell expressed, developmentally down-regulated 9
A_23_P22526	0.00913	0.0012	0.796887	HEPH	hephaestin
A_32_P41744	0.00143	9.2e-05	0.796428
A_24_P100613	0.000377	1.44e-05	0.796042	LAMA1	laminin subunit alpha 1
A_23_P146146	0.00154	0.000103	0.793797	ATP6V0D2	ATPase H+ transporting V0 subunit d2
A_32_P182186	0.000118	2.94e-06	0.791433
A_23_P65779	0.00232	0.000182	0.789843	STRA6	stimulated by retinoic acid 6
A_23_P66739	0.0653	0.0173	0.789701	SLC13A5	solute carrier family 13 member 5
A_23_P349147	0.000573	2.57e-05	0.789069
A_32_P125771	7.06e-06	9.36e-08	0.783583	RGS22	regulator of G-protein signaling 22
A_24_P497464	0.0605	0.0156	0.783013	SOX9-AS1	SOX9 antisense RNA 1
A_23_P352861	0.00393	0.00038	0.781244	TRBV5-4	T cell receptor beta variable 5-4
A_23_P209167	0.0112	0.00158	0.780852	FSTL3	follistatin like 3
A_23_P56505	0.0456	0.0106	0.779772	ITGA4	integrin subunit alpha 4
A_23_P211233	0.00775	0.000972	0.778059	COL6A2	collagen type VI alpha 2 chain
A_32_P181222	0.0049	0.000515	0.775739	KCNMA1	potassium calcium-activated channel subfamily M alpha 1
A_23_P153917	0.000191	5.74e-06	0.774667	MAP2	microtubule associated protein 2
A_32_P24382	0.017	0.00281	0.773124	KRTAP2-3	keratin associated protein 2-3
A_32_P85593	0.0289	0.00573	0.772514	LOC100101478	H2B histone family member M pseudogene
A_24_P52921	0.000553	2.46e-05	0.771811	BCAT1	branched chain amino acid transaminase 1
A_23_P110569	0.000216	6.86e-06	0.770673	TRIM36	tripartite motif containing 36
A_23_P394809	0.00474	0.000494	0.770558	DTNA	dystrobrevin alpha
A_23_P24507	0.00928	0.00123	0.769881	LOC643733	caspase 4, apoptosis-related cysteine peptidase pseudogene
A_23_P360302	0.00791	0.001	0.769293	GUCY2F	guanylate cyclase 2F, retinal
A_23_P84399	0.000157	4.41e-06	0.768875	CNTNAP2	contactin associated protein-like 2
A_23_P21260	0.000119	2.97e-06	0.768057
A_23_P160968	4.49e-05	8.57e-07	0.766242	LAMC2	laminin subunit gamma 2
A_23_P161659	0.0116	0.00167	0.765281	SYT13	synaptotagmin 13
A_32_P173357	0.0606	0.0156	0.763938	LOC439938	uncharacterized LOC439938
A_23_P386320	0.00686	0.000819	0.761201	MELTF	melanotransferrin
A_23_P158593	0.0505	0.0122	0.759513	COL5A1	collagen type V alpha 1 chain
A_23_P102058	0.00299	0.000258	0.759101	MATN3	matrilin 3
A_23_P93960	0.124	0.0423	0.758123	PRSS37	protease, serine 37
A_24_P231483	0.000114	2.81e-06	0.755967	MAP2	microtubule associated protein 2
A_32_P93584	0.00181	0.000128	0.754187
A_23_P23346	0.00117	6.97e-05	0.754086	MLLT11	myeloid/lymphoid or mixed-lineage leukemia; translocated to, 11
A_23_P18798	0.00238	0.000188	0.753198	PCDHB9	protocadherin beta 9
A_23_P334447	0.000136	3.64e-06	0.752155	FHAD1	forkhead associated phosphopeptide binding domain 1
A_23_P43810	8.66e-05	1.99e-06	0.751975	LTBP1	latent transforming growth factor beta binding protein 1
A_23_P15727	0.0119	0.00172	0.749909	FKBP10	FK506 binding protein 10
A_23_P46660	3.1e-06	3.59e-08	0.749897
A_32_P61495	0.000129	3.36e-06	0.749173	FHAD1	forkhead associated phosphopeptide binding domain 1
A_23_P159907	0.0223	0.00406	0.7479	MAGED4B	MAGE family member D4B
A_23_P307382	0.00178	0.000124	0.746557	SLC32A1	solute carrier family 32 member 1
A_23_P162579	0.000389	1.51e-05	0.745546	HSPB8	heat shock protein family B (small) member 8
A_32_P80809	0.00131	8.16e-05	0.744511
A_32_P4985	0.0314	0.00638	0.742971	CAMTA1	calmodulin binding transcription activator 1
A_24_P326660	3.59e-05	6.51e-07	0.742534	MCAM	melanoma cell adhesion molecule
A_32_P226646	0.00409	0.000398	0.738928
A_23_P32577	0.00416	0.00041	0.738628	DACH1	dachshund family transcription factor 1
A_24_P278747	0.000117	2.9e-06	0.737714	CCND2	cyclin D2
A_23_P69738	0.00309	0.000269	0.735989	RASL11B	RAS like family 11 member B
A_23_P391344	0.00122	7.36e-05	0.730963	RASGEF1A	RasGEF domain family member 1A
A_23_P253982	6.13e-05	1.3e-06	0.730637	HOXA4	homeobox A4
A_24_P289954	0.000293	1.04e-05	0.730561	RGAG4	retrotransposon gag domain containing 4
A_23_P156327	0.00247	0.000198	0.730305	TGFBI	transforming growth factor beta induced
A_24_P945059	0.00773	0.000969	0.728641	MYCT1	myc target 1
A_23_P144656	0.0103	0.00142	0.7268	CDH10	cadherin 10
A_23_P113212	0.0144	0.00222	0.724849	TMEM45A	transmembrane protein 45A
A_32_P732971	0.0189	0.00323	0.723914
A_23_P68031	0.000757	3.81e-05	0.722393	STAT4	signal transducer and activator of transcription 4
A_32_P150748	0.0126	0.00186	0.722358	MAGI2-AS3	MAGI2 antisense RNA 3
A_23_P138194	0.00121	7.26e-05	0.721022	NCF2	neutrophil cytosolic factor 2
A_23_P253536	0.00303	0.000262	0.716737	NPR3	natriuretic peptide receptor 3
A_32_P37867	0.00938	0.00125	0.715569	KIAA1644	KIAA1644
A_23_P18559	0.000227	7.33e-06	0.714152	INPP4B	inositol polyphosphate-4-phosphatase type II B
A_23_P342869	0.0271	0.00525	0.713374	FMN2	formin 2
A_23_P380754	0.0154	0.00245	0.712903	PRSS1	protease, serine 1
A_23_P426681	0.064	0.0168	0.710338	CDH6	cadherin 6
A_32_P119348	0.000964	5.35e-05	0.709595	BICC1	BicC family RNA binding protein 1
A_24_P69095	0.00144	9.36e-05	0.709366	ENC1	ectodermal-neural cortex 1
A_32_P173662	0.000498	2.11e-05	0.708547	CRISP2	cysteine rich secretory protein 2
A_23_P52207	0.0123	0.00181	0.708463	BAMBI	BMP and activin membrane bound inhibitor
A_24_P87036	0.0036	0.000336	0.707152	ANO1	anoctamin 1
A_23_P83289	0.0114	0.00163	0.706515	CERCAM	cerebral endothelial cell adhesion molecule
A_23_P350698	8.34e-05	1.89e-06	0.706067	ANKFN1	ankyrin repeat and fibronectin type III domain containing 1
A_24_P235266	0.000365	1.38e-05	0.705806	GRB10	growth factor receptor bound protein 10
A_32_P47474	0.000404	1.59e-05	0.704781
A_23_P425681	0.00177	0.000124	0.703275	CCK	cholecystokinin
A_23_P214281	4.42e-05	8.4e-07	0.70252	PAQR8	progestin and adipoQ receptor family member 8
A_24_P135319	0.00226	0.000175	0.701376	CGNL1	cingulin like 1
A_23_P214026	3.94e-06	4.78e-08	0.699499	FBN2	fibrillin 2
A_23_P436369	5.15e-05	1.03e-06	0.698525	FILIP1	filamin A interacting protein 1
A_24_P882732	0.000376	1.44e-05	0.697438
A_23_P168532	0.000212	6.62e-06	0.697145	FSCN1	fascin actin-bundling protein 1
A_23_P309973	9.62e-05	2.28e-06	0.697071	PPP1R36	protein phosphatase 1 regulatory subunit 36
A_23_P96599	0.0213	0.0038	0.696913	TMSB15B	thymosin beta 15B
A_24_P201552	0.00216	0.000164	0.696305	FEZ1	fasciculation and elongation protein zeta 1
A_32_P89709	0.02	0.00349	0.693025	TPM1	tropomyosin 1 (alpha)
A_32_P379467	0.00531	0.000578	0.692908	ISLR2	immunoglobulin superfamily containing leucine rich repeat 2
A_23_P28186	0.000248	8.28e-06	0.692761	SRD5A2	steroid 5 alpha-reductase 2
A_23_P401606	0.000427	1.7e-05	0.6924	EDIL3	EGF like repeats and discoidin domains 3
A_23_P96158	0.000425	1.69e-05	0.691654	KRT17	keratin 17
A_23_P335661	0.00194	0.000142	0.691553	SAMD4A	sterile alpha motif domain containing 4A
A_23_P48109	7.25e-05	1.6e-06	0.69081	NINJ2	ninjurin 2
A_32_P118348	0.00132	8.25e-05	0.690649
A_23_P410233	0.0027	0.000224	0.690457	FILIP1	filamin A interacting protein 1
A_32_P4262	0.000114	2.8e-06	0.69035	CFAP61	cilia and flagella associated protein 61
A_23_P162171	0.00013	3.43e-06	0.689776	MCAM	melanoma cell adhesion molecule
A_32_P45229	0.00783	0.000987	0.689244
A_23_P161280	0.00266	0.00022	0.68793	SPOCK2	sparc/osteonectin, cwcv and kazal-like domains proteoglycan (testican) 2
A_23_P394064	4.16e-05	7.82e-07	0.686399	PTRF	polymerase I and transcript release factor
A_23_P127824	0.00192	0.000138	0.686108	TNNT3	troponin T3, fast skeletal type
A_32_P11381	0.0146	0.00227	0.685735
A_23_P86710	0.00336	0.000304	0.68573	FRMPD2	FERM and PDZ domain containing 2
A_23_P41498	0.000115	2.85e-06	0.685567	ADH6	alcohol dehydrogenase 6 (class V)
A_23_P433798	0.00169	0.000116	0.68464	PODNL1	podocan like 1
A_23_P111888	0.00576	0.000645	0.684081	CTHRC1	collagen triple helix repeat containing 1
A_23_P2745	0.0384	0.00838	0.68229	GJB6	gap junction protein beta 6
A_23_P1331	0.0443	0.0102	0.68173	COL13A1	collagen type XIII alpha 1 chain
A_32_P62106	0.00199	0.000145	0.681272
A_32_P34826	0.015	0.00236	0.680848	B3GALT5-AS1	B3GALT5 antisense RNA 1
A_23_P425766	0.000802	4.1e-05	0.680095	KLHL32	kelch like family member 32
A_24_P360674	0.00539	0.000589	0.679703	CDKN2B	cyclin dependent kinase inhibitor 2B
A_23_P153480	0.0291	0.00576	0.677948	KLK5	kallikrein related peptidase 5
A_23_P88033	0.000701	3.41e-05	0.677366	FGF14	fibroblast growth factor 14
A_24_P929083	0.00124	7.5e-05	0.676659	MAGI2-AS3	MAGI2 antisense RNA 3
A_23_P36888	0.000188	5.62e-06	0.676619	PCED1B	PC-esterase domain containing 1B
A_24_P933618	0.00064	3.04e-05	0.675716
A_23_P39925	0.00569	0.000634	0.674822	DYSF	dysferlin
A_23_P327451	0.00253	0.000206	0.674639	NPR3	natriuretic peptide receptor 3
A_23_P338325	1.27e-05	1.87e-07	0.674319	ELK3	ELK3, ETS transcription factor
A_23_P200001	0.0184	0.0031	0.674301	NEXN	nexilin F-actin binding protein
A_23_P89431	0.165	0.0639	0.674063	CCL2	C-C motif chemokine ligand 2
A_24_P156490	0.00229	0.00018	0.673956	KCNMA1	potassium calcium-activated channel subfamily M alpha 1
A_23_P406025	0.000282	9.86e-06	0.673562	PRUNE2	prune homolog 2
A_24_P252057	0.000431	1.73e-05	0.673513	RBM24	RNA binding motif protein 24
A_23_P30687	0.00434	0.000434	0.673403	SERPINB9	serpin family B member 9
A_23_P50786	0.0258	0.00492	0.673316	CLIP3	CAP-Gly domain containing linker protein 3
A_23_P40718	0.000607	2.81e-05	0.673167	PARVB	parvin beta
A_24_P938403	0.0192	0.0033	0.673042	JPH3	junctophilin 3
A_23_P14157	0.000135	3.61e-06	0.672987	DZIP1	DAZ interacting zinc finger protein 1
A_24_P354715	0.0338	0.00704	0.672545	NT5E	5'-nucleotidase ecto
A_24_P610405	0.00403	0.000391	0.672334
A_23_P86975	0.00309	0.00027	0.670134	CARD18	caspase recruitment domain family member 18
A_32_P471485	0.00387	0.000371	0.670105	RTKN2	rhotekin 2
A_23_P132763	0.0195	0.00337	0.668986	VGLL3	vestigial like family member 3
A_32_P174303	0.000436	1.76e-05	0.667985	MPV17L	MPV17 mitochondrial inner membrane protein like
A_23_P209636	0.00209	0.000157	0.667878	CDC42EP3	CDC42 effector protein 3
A_23_P408363	0.0292	0.0058	0.667875	ITGBL1	integrin subunit beta like 1
A_24_P687302	0.000162	4.58e-06	0.667181	LAMA3	laminin subunit alpha 3
A_23_P47322	0.000151	4.19e-06	0.667033	BTG4	BTG anti-proliferation factor 4
A_24_P365975	0.00465	0.000479	0.666815	COL8A2	collagen type VIII alpha 2 chain
A_23_P89780	0.000254	8.57e-06	0.666674	LAMA3	laminin subunit alpha 3
A_23_P153185	0.00169	0.000116	0.666416	SERPINB2	serpin family B member 2
A_32_P62145	0.000136	3.64e-06	0.66611	P4HA2	prolyl 4-hydroxylase subunit alpha 2
A_23_P259270	0.000114	2.82e-06	0.666019	CDKL2	cyclin dependent kinase like 2
A_32_P232413	0.00048	2e-05	0.665578	KCNN3	potassium calcium-activated channel subfamily N member 3
A_24_P626951	0.000238	7.85e-06	0.665546
A_24_P124550	0.000731	3.63e-05	0.66503	CCND1	cyclin D1
A_23_P327551	0.00193	0.00014	0.665005	CPNE4	copine 4
A_32_P25639	0.0264	0.00505	0.664333	TRAPPC3L	trafficking protein particle complex 3 like
A_32_P175979	0.0549	0.0137	0.663134	POU2F2	POU class 2 homeobox 2
A_24_P295010	0.00554	0.000612	0.662808	SERPINB9	serpin family B member 9
A_23_P30294	0.149	0.0551	0.662382	CDO1	cysteine dioxygenase type 1
A_23_P212800	0.042	0.00947	0.65985	FGF5	fibroblast growth factor 5
A_32_P125402	0.000253	8.48e-06	0.659833
A_24_P66545	0.0789	0.0224	0.659816	RUBCN	RUN and cysteine rich domain containing beclin 1 interacting protein
A_23_P95930	1.3e-05	1.93e-07	0.659305	HMGA2	high mobility group AT-hook 2
A_24_P86993	0.0258	0.00491	0.65873	JAM3	junctional adhesion molecule 3
A_23_P126167	0.000318	1.17e-05	0.658546	KCNN3	potassium calcium-activated channel subfamily N member 3
A_23_P19624	6.06e-05	1.28e-06	0.657666	BMP6	bone morphogenetic protein 6
A_32_P313405	0.00471	0.000489	0.657647	LAMA1	laminin subunit alpha 1
A_24_P944253	0.000848	4.45e-05	0.657093	KLHL6	kelch like family member 6
A_24_P918317	0.000285	1e-05	0.656917	DKK3	dickkopf WNT signaling pathway inhibitor 3
A_23_P303548	0.0421	0.00952	0.656879	NOL4L	nucleolar protein 4 like
A_23_P34478	0.000951	5.24e-05	0.656704	GIPC2	GIPC PDZ domain containing family member 2
A_23_P212500	0.0164	0.00265	0.656535	TF	transferrin
A_24_P294408	0.000629	2.96e-05	0.655937	PLA1A	phospholipase A1 member A
A_23_P93938	0.00369	0.000348	0.654568	NACAD	NAC alpha domain containing
A_32_P129945	0.00774	0.000971	0.654393
A_23_P340822	9.76e-05	2.32e-06	0.653691	CATSPERD	cation channel sperm associated auxiliary subunit delta
A_32_P75792	0.00898	0.00118	0.653662	FAM132A	family with sequence similarity 132 member A
A_23_P384044	0.00281	0.000237	0.653632	CNIH3	cornichon family AMPA receptor auxiliary protein 3
A_24_P226970	0.00686	0.00082	0.653161	ZNF365	zinc finger protein 365
A_23_P32444	0.0227	0.00414	0.652614	MXRA8	matrix remodeling associated 8
A_32_P221966	0.013	0.00193	0.652022	SFTA1P	surfactant associated 1, pseudogene
A_23_P75056	0.0279	0.00543	0.65168	GATA3	GATA binding protein 3
A_23_P58676	0.0146	0.00226	0.651146	NPR3	natriuretic peptide receptor 3
A_23_P418274	0.000133	3.54e-06	0.650766	WBSCR28	Williams-Beuren syndrome chromosome region 28
A_23_P150053	0.0231	0.00425	0.650509	ACTA2	actin, alpha 2, smooth muscle, aorta
A_32_P225806	0.0133	0.002	0.65033	LOC105376714///SLC30A4	uncharacterized LOC105376714///solute carrier family 30 member 4
A_32_P3221	0.00419	0.000414	0.650141
A_23_P202013	0.11	0.0356	0.649806	ZEB1	zinc finger E-box binding homeobox 1
A_23_P56433	0.00136	8.51e-05	0.649663	C2orf40	chromosome 2 open reading frame 40
A_23_P330611	0.000642	3.05e-05	0.649619	WIPF1	WAS/WASL interacting protein family member 1
A_32_P158723	0.0469	0.011	0.649065
A_23_P136433	0.0355	0.0075	0.648452
A_32_P32195	0.0171	0.00282	0.648419
A_24_P148261	0.0032	0.000283	0.64817	TGFB2	transforming growth factor beta 2
A_24_P309521	0.0168	0.00275	0.647895	KCNJ5	potassium voltage-gated channel subfamily J member 5
A_23_P92928	0.000706	3.45e-05	0.647325	C6	complement component 6
A_23_P86610	0.00554	0.000612	0.647321	ZNF365	zinc finger protein 365
A_24_P167668	0.00221	0.00017	0.646316	LTBP2	latent transforming growth factor beta binding protein 2
A_23_P138931	0.0323	0.00661	0.645629	MMP13	matrix metallopeptidase 13
A_24_P77008	0.0508	0.0123	0.645596	PTGS2	prostaglandin-endoperoxide synthase 2
A_32_P157208	0.00483	0.000505	0.645532	PGM5-AS1	PGM5 antisense RNA 1
A_23_P96568	0.000216	6.87e-06	0.644481	FLNA	filamin A
A_23_P418031	0.00473	0.000492	0.644337	IFFO2	intermediate filament family orphan 2
A_23_P217998	0.0231	0.00424	0.6429	JAM3	junctional adhesion molecule 3
A_23_P213424	0.00705	0.000851	0.642122	ENC1	ectodermal-neural cortex 1
A_23_P170072	0.00228	0.000177	0.641402	KCNMB2	potassium calcium-activated channel subfamily M regulatory beta subunit 2
A_23_P354805	6.95e-05	1.52e-06	0.641375	KLF12	Kruppel like factor 12
A_32_P48198	0.00353	0.000327	0.64123
A_24_P321125	0.000109	2.64e-06	0.641032	LRRC18	leucine rich repeat containing 18
A_23_P216812	0.00431	0.00043	0.640768	CDKN2B	cyclin dependent kinase inhibitor 2B
A_32_P83570	0.0708	0.0193	0.64044
A_23_P258136	0.000382	1.47e-05	0.640358	MXRA5	matrix remodeling associated 5
A_23_P88849	0.00271	0.000225	0.640264	RRAD	RRAD, Ras related glycolysis inhibitor and calcium channel regulator
A_23_P2032	6.32e-09	3.1e-11	0.6402
A_23_P120325	0.00257	0.00021	0.639507	KIF3C	kinesin family member 3C
A_23_P354705	0.00025	8.36e-06	0.638873	ST8SIA1	ST8 alpha-N-acetyl-neuraminide alpha-2,8-sialyltransferase 1
A_23_P162047	0.00127	7.78e-05	0.638749	DKK3	dickkopf WNT signaling pathway inhibitor 3
A_24_P100301	0.00226	0.000175	0.638109	GIPC2	GIPC PDZ domain containing family member 2
A_23_P128008	0.00102	5.73e-05	0.637964	CCDC81	coiled-coil domain containing 81
A_23_P112564	0.000461	1.89e-05	0.637307	KCND2	potassium voltage-gated channel subfamily D member 2
A_24_P365515	3.66e-05	6.68e-07	0.637241	FOXA2	forkhead box A2
A_24_P65060	0.00989	0.00134	0.63674	MEX3B	mex-3 RNA binding family member B
A_32_P8371	8.41e-06	1.15e-07	0.636529
A_23_P363344	0.000523	2.26e-05	0.63491	TPM1	tropomyosin 1 (alpha)
A_24_P6517	0.000389	1.5e-05	0.634504	PLEKHG1	pleckstrin homology and RhoGEF domain containing G1
A_24_P402438	0.00359	0.000335	0.634412	TGFB2	transforming growth factor beta 2
A_23_P61149	0.00563	0.000625	0.634315	INPP5D	inositol polyphosphate-5-phosphatase D
A_24_P179569	0.000282	9.86e-06	0.634137	LAMA3	laminin subunit alpha 3
A_23_P161368	0.00113	6.64e-05	0.633424	CYP2C8	cytochrome P450 family 2 subfamily C member 8
A_24_P245379	0.00459	0.000469	0.633037	SERPINB2	serpin family B member 2
A_23_P38106	0.00388	0.000373	0.632204	SPHK1	sphingosine kinase 1
A_23_P216649	0.0034	0.000309	0.631816	ABCA1	ATP binding cassette subfamily A member 1
A_23_P38816	0.000125	3.21e-06	0.63168	A1BG	alpha-1-B glycoprotein
A_32_P212958	0.0049	0.000516	0.631109
A_24_P475349	0.00264	0.000217	0.630902	RAB6B	RAB6B, member RAS oncogene family
A_23_P135063	0.0241	0.00446	0.630652
A_23_P22682	0.0366	0.00783	0.629835	ARMCX1	armadillo repeat containing, X-linked 1
A_23_P122493	0.0182	0.00307	0.629242	TRIM31	tripartite motif containing 31
A_32_P201897	0.00631	0.000732	0.628966	FMN2	formin 2
A_23_P8513	0.00213	0.000161	0.628933	SNX10	sorting nexin 10
A_23_P88767	0.00154	0.000102	0.628566	PLA2G10	phospholipase A2 group X
A_23_P310460	0.0161	0.00259	0.627544	MDGA1	MAM domain containing glycosylphosphatidylinositol anchor 1
A_32_P41604	0.00618	0.000713	0.627384	F5	coagulation factor V
A_23_P254680	3.15e-05	5.59e-07	0.626439	ULK4	unc-51 like kinase 4
A_23_P11980	0.000422	1.68e-05	0.626325	CFAP57	cilia and flagella associated protein 57
A_32_P114117	7.02e-06	9.27e-08	0.625656
A_23_P162918	0.0393	0.00865	0.624719	SERPINA3	serpin family A member 3
A_32_P42725	0.00082	4.23e-05	0.624175
A_23_P50919	0.0144	0.00222	0.623268	SERPINE2	serpin family E member 2
A_24_P81789	0.00616	0.00071	0.622937	RHOF	ras homolog family member F, filopodia associated
A_24_P889237	0.00046	1.89e-05	0.622824	ANKRD66	ankyrin repeat domain 66
A_32_P145039	0.00445	0.00045	0.622545	ALDH1A3	aldehyde dehydrogenase 1 family member A3
A_32_P58699	0.00306	0.000266	0.622226	LRRC63	leucine rich repeat containing 63
A_24_P110827	0.00544	0.000596	0.621606
A_24_P915464	0.0867	0.0257	0.621492
A_23_P84929	0.00179	0.000125	0.621151	SLC38A5	solute carrier family 38 member 5
A_23_P64792	0.00193	0.00014	0.620825	KCNMB4	potassium calcium-activated channel subfamily M regulatory beta subunit 4
A_32_P21993	0.0183	0.00309	0.620265	TPM4	tropomyosin 4
A_32_P116556	0.0106	0.00147	0.620146	ZNF469	zinc finger protein 469
A_23_P100730	0.000636	3e-05	0.619219	SKAP1	src kinase associated phosphoprotein 1
A_23_P166633	0.000288	1.02e-05	0.618879	ITGB5	integrin subunit beta 5
A_23_P2920	0.0282	0.00552	0.618541	SERPINA3	serpin family A member 3
A_24_P924697	0.00598	0.000682	0.617993	CDC42EP3	CDC42 effector protein 3
A_23_P25150	0.061	0.0157	0.617738	HOXC9	homeobox C9
A_32_P8156	5.42e-05	1.1e-06	0.617481	C10orf107	chromosome 10 open reading frame 107
A_23_P88069	1.71e-05	2.68e-07	0.616993	LHFP	lipoma HMGIC fusion partner
A_24_P275073	0.096	0.0296	0.616902	ADAMTS14	ADAM metallopeptidase with thrombospondin type 1 motif 14
A_32_P75284	8.65e-05	1.99e-06	0.616531	KATNAL1	katanin catalytic subunit A1 like 1
A_24_P296772	0.0143	0.00219	0.61627	PPP1R14A	protein phosphatase 1 regulatory inhibitor subunit 14A
A_23_P92517	0.000225	7.26e-06	0.615403	TTC29	tetratricopeptide repeat domain 29
A_23_P386384	0.000301	1.07e-05	0.615358	C1orf87	chromosome 1 open reading frame 87
A_23_P21882	0.0012	7.22e-05	0.61457
A_23_P20443	0.00122	7.35e-05	0.613703	LZTS1	leucine zipper tumor suppressor 1
A_23_P5983	6.88e-06	9.07e-08	0.61341	PLTP	phospholipid transfer protein
A_23_P98304	0.000689	3.33e-05	0.613087	ANO1	anoctamin 1
A_23_P170888	0.0024	0.00019	0.612659	DPP6	dipeptidyl peptidase like 6
A_24_P937139	0.0799	0.0228	0.611676	SNAI2	snail family transcriptional repressor 2
A_24_P456452	4.98e-09	2.38e-11	0.611592	QKI	QKI, KH domain containing RNA binding
A_24_P165545	0.0108	0.0015	0.611095	TTLL10	tubulin tyrosine ligase like 10
A_23_P44674	0.000532	2.32e-05	0.610385	CRIP1	cysteine rich protein 1
A_32_P44139	0.00694	0.000836	0.61033
A_24_P509893	0.00254	0.000207	0.60964	LOC158402	uncharacterized LOC158402
A_23_P138725	0.00181	0.000128	0.609617	MARVELD1	MARVEL domain containing 1
A_23_P501624	0.000161	4.57e-06	0.609512	UGT2B17	UDP glucuronosyltransferase family 2 member B17
A_23_P126613	0.000773	3.91e-05	0.60873	AQP10	aquaporin 10
A_24_P760945	0.0549	0.0137	0.608408
A_23_P151415	2.02e-05	3.24e-07	0.607933	KATNAL1	katanin catalytic subunit A1 like 1
A_24_P861099	0.0181	0.00305	0.607241	CASC15	cancer susceptibility candidate 15 (non-protein coding)
A_24_P589001	0.000164	4.69e-06	0.607215	ZNF503-AS1	ZNF503 antisense RNA 1
A_24_P193011	0.000141	3.85e-06	0.60661	CCND1	cyclin D1
A_23_P2006	0.000259	8.79e-06	0.606335	CNGA4	cyclic nucleotide gated channel alpha 4
A_24_P773539	0.0014	8.9e-05	0.605976
A_24_P887857	0.00157	0.000105	0.604571
A_24_P389415	0.0603	0.0155	0.604552	PNMA2	paraneoplastic Ma antigen 2
A_23_P354908	0.000238	7.86e-06	0.604361	NMNAT2	nicotinamide nucleotide adenylyltransferase 2
A_23_P118025	0.000397	1.56e-05	0.603791	DPEP2	dipeptidase 2
A_24_P129417	8.42e-05	1.92e-06	0.603356	BMP1	bone morphogenetic protein 1
A_23_P76992	0.00989	0.00134	0.603262	PGF	placental growth factor
A_23_P329340	0.00663	0.000782	0.603219	DNAH3	dynein axonemal heavy chain 3
A_24_P942346	0.000831	4.34e-05	0.603191	ECT2L	epithelial cell transforming 2 like
A_23_P34031	0.0164	0.00266	0.602925	XAGE2	X antigen family member 2
A_23_P500936	0.000712	3.49e-05	0.602303	FOXA2	forkhead box A2
A_24_P261417	0.0043	0.000429	0.60217	DKK3	dickkopf WNT signaling pathway inhibitor 3
A_32_P841049	0.00229	0.000178	0.601827	HDAC9	histone deacetylase 9
A_23_P154217	0.00591	0.000669	0.6016	ITGB6	integrin subunit beta 6
A_24_P416177	0.000391	1.52e-05	0.601434	ADCY7	adenylate cyclase 7
A_23_P386942	0.00254	0.000207	0.601315	DIRAS1	DIRAS family GTPase 1
A_23_P139965	6.28e-05	1.34e-06	0.599703	SERP2	stress-associated endoplasmic reticulum protein family member 2
A_23_P325737	0.000382	1.46e-05	0.599095	CCDC60	coiled-coil domain containing 60
A_23_P257649	0.000153	4.29e-06	0.59896	RBP1	retinol binding protein 1
A_23_P201193	0.0027	0.000224	0.598806	TSPAN2	tetraspanin 2
A_24_P84668	0.00159	0.000107	0.598339	FILIP1	filamin A interacting protein 1
A_23_P148422	0.000224	7.19e-06	0.598035	PCYT1B	phosphate cytidylyltransferase 1, choline, beta
A_23_P61057	0.022	0.00399	0.598022	IL16	interleukin 16
A_23_P339119	0.00494	0.000522	0.597193	ACSS3	acyl-CoA synthetase short-chain family member 3
A_23_P252721	0.00483	0.000506	0.597128	DLC1	DLC1 Rho GTPase activating protein
A_32_P459533	0.000183	5.41e-06	0.597092	FCHO1	FCH domain only 1
A_23_P212696	0.00115	6.83e-05	0.596828	FSTL1	follistatin like 1
A_23_P48350	0.045	0.0104	0.5958	CLDN10	claudin 10
A_23_P19176	0.0326	0.00671	0.595468	C5orf46	chromosome 5 open reading frame 46
A_23_P312271	0.00208	0.000156	0.595109	TEX26	testis expressed 26
A_24_P31627	0.00513	0.000548	0.594769	KCNB1	potassium voltage-gated channel subfamily B member 1
A_23_P259251	0.000867	4.57e-05	0.594541	KCND2	potassium voltage-gated channel subfamily D member 2
A_23_P333640	0.00292	0.00025	0.594294	PAPLN	papilin, proteoglycan like sulfated glycoprotein
A_24_P392991	0.00108	6.22e-05	0.594104	KRT16	keratin 16
A_32_P73796	0.000279	9.74e-06	0.593456	PPM1E	protein phosphatase, Mg2+/Mn2+ dependent 1E
A_23_P167328	0.0191	0.00328	0.593429	CD38	CD38 molecule
A_23_P212655	0.000114	2.8e-06	0.593391	KLHL6	kelch like family member 6
A_24_P267523	0.00406	0.000395	0.593178	COX6B2	cytochrome c oxidase subunit 6B2
A_23_P334883	0.000771	3.9e-05	0.593153	SHANK2	SH3 and multiple ankyrin repeat domains 2
A_24_P490109	2.6e-05	4.39e-07	0.593152
A_23_P33277	8.64e-05	1.98e-06	0.592868
A_23_P48198	0.00337	0.000306	0.592717	GLT8D2	glycosyltransferase 8 domain containing 2
A_23_P50338	0.0007	3.4e-05	0.592659	TUBB4A	tubulin beta 4A class IVa
A_24_P73599	0.00544	0.000597	0.591996	IL16	interleukin 16
A_23_P502142	0.00266	0.000219	0.591992	FYN	FYN proto-oncogene, Src family tyrosine kinase
A_24_P235429	0.00479	0.0005	0.591959	ABCA1	ATP binding cassette subfamily A member 1
A_32_P112293	0.00556	0.000614	0.591108	MAJIN	membrane anchored junction protein
A_24_P299685	0.00154	0.000103	0.590974	PDPN	podoplanin
A_23_P83751	0.000191	5.76e-06	0.590436	C11orf63	chromosome 11 open reading frame 63
A_23_P358597	0.00471	0.000489	0.590375	POPDC3	popeye domain containing 3
A_23_P218928	0.0185	0.00313	0.590309	FAM198B	family with sequence similarity 198 member B
A_23_P218369	0.00253	0.000205	0.589248	CCL14	C-C motif chemokine ligand 14
A_23_P170901	3.37e-05	6.05e-07	0.589245	PACRG	PARK2 coregulated
A_23_P163251	0.0167	0.00272	0.589205	PAQR5	progestin and adipoQ receptor family member 5
A_23_P73972	0.00399	0.000385	0.589147	GPX7	glutathione peroxidase 7
A_23_P129856	0.0105	0.00145	0.58829	HIC1	hypermethylated in cancer 1
A_32_P220161	0.00148	9.73e-05	0.587847
A_23_P212508	0.0332	0.00686	0.587504	TF	transferrin
A_32_P78809	0.00213	0.000161	0.587228
A_32_P132393	0.00194	0.000141	0.586848
A_24_P357847	0.000119	2.98e-06	0.586315
A_24_P133584	0.000662	3.17e-05	0.586012	MFGE8	milk fat globule-EGF factor 8 protein
A_32_P205053	0.000353	1.32e-05	0.585477	UBXN10	UBX domain protein 10
A_23_P357351	0.000235	7.69e-06	0.585463	MPV17L	MPV17 mitochondrial inner membrane protein like
A_23_P70598	0.00227	0.000176	0.585269	TCP11	t-complex 11
A_23_P126649	0.0279	0.00545	0.584108
A_24_P319088	0.000481	2e-05	0.584101	CCL23	C-C motif chemokine ligand 23
A_24_P840042	0.00282	0.000238	0.583123	LINC00643	long intergenic non-protein coding RNA 643
A_24_P497318	1.25e-05	1.84e-07	0.582589	LOC100129973	uncharacterized LOC100129973
A_32_P85999	0.00141	9.03e-05	0.582245	CDH13	cadherin 13
A_32_P148118	9.54e-05	2.23e-06	0.581326
A_23_P63547	0.00154	0.000103	0.58109
A_24_P940115	0.0316	0.00643	0.580929	DLC1	DLC1 Rho GTPase activating protein
A_32_P160045	0.00109	6.29e-05	0.580924	TCTEX1D1	Tctex1 domain containing 1
A_23_P351215	0.00253	0.000206	0.579957	SKIL	SKI-like proto-oncogene
A_32_P156006	1.53e-05	2.34e-07	0.57993
A_23_P213527	0.0596	0.0152	0.578908
A_32_P108722	0.0006	2.75e-05	0.578639
A_24_P16383	0.00163	0.000111	0.578375	C11orf88	chromosome 11 open reading frame 88
A_23_P39056	0.0425	0.00964	0.577992	KLK7	kallikrein related peptidase 7
A_23_P31046	0.0031	0.000271	0.57764	MYCT1	myc target 1
A_23_P302018	0.082	0.0237	0.577122	TXK	TXK tyrosine kinase
A_32_P143824	0.000135	3.6e-06	0.576636
A_24_P326491	0.000194	5.86e-06	0.576629	MKX	mohawk homeobox
A_23_P217009	0.000696	3.38e-05	0.575381	C9orf24	chromosome 9 open reading frame 24
A_23_P399255	0.00052	2.24e-05	0.574995	RNF182	ring finger protein 182
A_23_P368882	0.000828	4.31e-05	0.574609	FAM227B	family with sequence similarity 227 member B
A_23_P310274	0.00106	6.05e-05	0.574535	PRSS2	protease, serine 2
A_32_P228348	0.00752	0.000932	0.574395	LOC401472	myosin IC heavy chain
A_24_P401855	0.0579	0.0146	0.574342	FGF5	fibroblast growth factor 5
A_32_P486620	0.000548	2.42e-05	0.573122	IGSF22	immunoglobulin superfamily member 22
A_23_P15146	0.0469	0.011	0.573121	IL32	interleukin 32
A_23_P168531	0.00101	5.65e-05	0.573062	FSCN1	fascin actin-bundling protein 1
A_23_P43484	0.00115	6.76e-05	0.57289	CDKN2A	cyclin dependent kinase inhibitor 2A
A_23_P52410	0.0425	0.00962	0.572641	RTKN2	rhotekin 2
A_24_P507383	0.00457	0.000466	0.572487
A_23_P153958	0.014	0.00214	0.572169	INHBB	inhibin beta B subunit
A_23_P304716	0.000715	3.53e-05	0.572112	HES2	hes family bHLH transcription factor 2
A_24_P262127	0.0063	0.000731	0.57197	RRAD	RRAD, Ras related glycolysis inhibitor and calcium channel regulator
A_32_P34696	3.65e-05	6.66e-07	0.57109
A_24_P231104	0.00353	0.000327	0.570925	LEPR	leptin receptor
A_24_P221903	0.0549	0.0137	0.570901
A_32_P159706	0.0037	0.000349	0.570811
A_23_P319583	7.77e-05	1.73e-06	0.570516	RIMS3	regulating synaptic membrane exocytosis 3
A_32_P169406	0.000123	3.12e-06	0.570501	LOC400043	uncharacterized LOC400043
A_23_P45011	1.14e-05	1.64e-07	0.570351	PPP1R14C	protein phosphatase 1 regulatory inhibitor subunit 14C
A_23_P93591	0.000897	4.79e-05	0.570135	GJA1	gap junction protein alpha 1
A_23_P110204	0.0638	0.0167	0.570101	CXCL5	C-X-C motif chemokine ligand 5
A_24_P410605	0.0216	0.00387	0.569844	ROR1	receptor tyrosine kinase like orphan receptor 1
A_23_P396299	0.000349	1.3e-05	0.56958	MRVI1-AS1	MRVI1 antisense RNA 1
A_23_P348524	0.0019	0.000136	0.569345	LKAAEAR1	LKAAEAR motif containing 1
A_23_P162547	0.0165	0.00269	0.569009	MYL2	myosin light chain 2
A_23_P34597	0.011	0.00156	0.568375	CDA	cytidine deaminase
A_24_P723655	0.0414	0.00927	0.56834	LOC650226	ankyrin repeat domain 26 pseudogene
A_23_P133474	4.78e-05	9.32e-07	0.56789	GPX3	glutathione peroxidase 3
A_23_P334955	0.0154	0.00243	0.567694	FAM167A	family with sequence similarity 167 member A
A_32_P127997	2.81e-09	1.21e-11	0.567013	LOC644656	uncharacterized LOC644656
A_23_P115261	0.00664	0.000784	0.566962	AGT	angiotensinogen
A_32_P387648	0.0815	0.0235	0.566938	FLG	filaggrin
A_23_P48951	0.000886	4.7e-05	0.566562	MFGE8	milk fat globule-EGF factor 8 protein
A_23_P75147	0.000143	3.93e-06	0.566271	SPAG6	sperm associated antigen 6
A_24_P383523	0.000951	5.24e-05	0.565835	SAMD4A	sterile alpha motif domain containing 4A
A_32_P10403	0.0543	0.0134	0.565457	SERPINE1	serpin family E member 1
A_24_P410797	1.21e-05	1.77e-07	0.564614
A_24_P186370	0.000689	3.34e-05	0.564607	MSN	moesin
A_23_P204630	0.000304	1.08e-05	0.564328	NTN4	netrin 4
A_23_P116430	0.000196	5.92e-06	0.564234	USH1C	USH1 protein network component harmonin
A_24_P10953	0.000316	1.15e-05	0.563871	ZNF93	zinc finger protein 93
A_23_P303523	0.00113	6.62e-05	0.563737	KIF3C	kinesin family member 3C
A_23_P21713	0.000115	2.87e-06	0.563415	SPAG16	sperm associated antigen 16
A_24_P45481	0.002	0.000148	0.563097	AKT3	AKT serine/threonine kinase 3
A_24_P272146	4.59e-05	8.83e-07	0.562987	IGKC	immunoglobulin kappa constant
A_23_P56703	0.000187	5.56e-06	0.562947	TRABD2A	TraB domain containing 2A
A_32_P39440	0.000556	2.48e-05	0.562877
A_23_P19291	0.00165	0.000113	0.562525	TUBB2A	tubulin beta 2A class IIa
A_32_P178746	9.54e-05	2.23e-06	0.562217
A_24_P68008	0.109	0.0355	0.561874	DRAXIN	dorsal inhibitory axon guidance protein
A_23_P250231	0.00845	0.00109	0.561755	ANKRD7	ankyrin repeat domain 7
A_23_P50928	0.00944	0.00126	0.561751	C1QL2	complement C1q like 2
A_32_P35906	0.0558	0.014	0.561556
A_23_P156826	0.0021	0.000158	0.561418	ADTRP	androgen dependent TFPI regulating protein
A_24_P387926	0.00213	0.000161	0.561211	KMO	kynurenine 3-monooxygenase (kynurenine 3-hydroxylase)
A_23_P311713	0.011	0.00155	0.560888
A_23_P154037	0.00125	7.59e-05	0.560763	AOX1	aldehyde oxidase 1
A_24_P107695	0.000597	2.73e-05	0.560622	ACTN1	actinin alpha 1
A_23_P163306	0.00478	0.000499	0.559529	CGNL1	cingulin like 1
A_23_P211631	3.93e-05	7.31e-07	0.559528	FBLN1	fibulin 1
A_23_P345183	0.00297	0.000256	0.559454	NMNAT2	nicotinamide nucleotide adenylyltransferase 2
A_23_P122863	0.000629	2.95e-05	0.559397	GRB10	growth factor receptor bound protein 10
A_23_P47728	0.000797	4.07e-05	0.559225	MAP6	microtubule associated protein 6
A_23_P106922	1.32e-05	1.95e-07	0.557948	CHST6	carbohydrate sulfotransferase 6
A_32_P136800	4.55e-06	5.72e-08	0.5575
A_24_P110601	0.00142	9.14e-05	0.557497
A_23_P336342	0.00415	0.000407	0.557491	SLC4A8	solute carrier family 4 member 8
A_32_P159192	0.000219	6.98e-06	0.556962
A_32_P50834	0.000672	3.23e-05	0.556927	DIAPH2	diaphanous related formin 2
A_32_P37592	0.00028	9.76e-06	0.55669	SCARNA17	small Cajal body-specific RNA 17
A_24_P838448	0.00977	0.00131	0.556622	CASC15	cancer susceptibility candidate 15 (non-protein coding)
A_23_P217384	0.00747	0.000923	0.556619	AP1S2	adaptor related protein complex 1 sigma 2 subunit
A_32_P111394	0.0065	0.000762	0.556206
A_24_P483283	0.0194	0.00334	0.556155	LINC00578	long intergenic non-protein coding RNA 578
A_23_P80583	4.07e-05	7.61e-07	0.555968	CLDN16	claudin 16
A_23_P201731	0.00433	0.000432	0.555292	TRAF5	TNF receptor associated factor 5
A_23_P72912	0.00264	0.000218	0.55516
A_23_P92334	0.02	0.0035	0.555025	TMEM156	transmembrane protein 156
A_32_P182045	3.91e-12	7.01e-15	0.554654
A_32_P192667	0.000913	4.94e-05	0.554606
A_23_P257144	0.0054	0.000591	0.554525	PXDN	peroxidasin
A_32_P74814	0.00942	0.00125	0.554311
A_23_P303833	0.000169	4.88e-06	0.554272	SCN4B	sodium voltage-gated channel beta subunit 4
A_23_P28466	9.57e-05	2.25e-06	0.554098	DAW1	dynein assembly factor with WD repeats 1
A_24_P130363	0.00243	0.000194	0.554023	LDLRAD4	low density lipoprotein receptor class A domain containing 4
A_23_P404481	0.0288	0.00569	0.553722	S1PR1	sphingosine-1-phosphate receptor 1
A_23_P425917	0.154	0.0578	0.553048	FAM26E	family with sequence similarity 26 member E
A_24_P329353	6.5e-05	1.41e-06	0.552844	ORAI2	ORAI calcium release-activated calcium modulator 2
A_24_P281009	0.000575	2.58e-05	0.552148	AQP7P1	aquaporin 7 pseudogene 1
A_23_P111860	0.0513	0.0124	0.551876	RADIL	Rap associating with DIL domain
A_32_P106512	0.000272	9.43e-06	0.551859
A_24_P555619	0.00011	2.67e-06	0.551812
A_23_P107775	0.00115	6.83e-05	0.551388	TMEM190	transmembrane protein 190
A_23_P59582	0.000642	3.05e-05	0.551332	SEMA3E	semaphorin 3E
A_32_P187571	0.017	0.00279	0.550633	SCN2B	sodium voltage-gated channel beta subunit 2
A_23_P16834	0.000174	5.04e-06	0.549946	FNDC4	fibronectin type III domain containing 4
A_32_P90685	1.72e-07	1.25e-09	0.549804
A_24_P721699	0.0054	0.00059	0.549278	A1BG-AS1	A1BG antisense RNA 1
A_23_P391844	0.00313	0.000275	0.549141	CFAP47	cilia and flagella associated protein 47
A_32_P135243	0.000387	1.49e-05	0.548586	MTHFD1L	methylenetetrahydrofolate dehydrogenase (NADP+ dependent) 1-like
A_24_P144423	0.000793	4.04e-05	0.548408	PGM5	phosphoglucomutase 5
A_23_P93866	0.00416	0.00041	0.54704	DNAH11	dynein axonemal heavy chain 11
A_23_P215577	0.0168	0.00276	0.546766	HDAC9	histone deacetylase 9
A_32_P33802	0.0303	0.00608	0.546518
A_24_P12626	0.0014	8.95e-05	0.545855	CAV1	caveolin 1
A_23_P134454	0.00142	9.08e-05	0.545613	CAV1	caveolin 1
A_23_P391275	8.84e-05	2.04e-06	0.545498	RCAN3	RCAN family member 3
A_24_P484322	0.0199	0.00346	0.54549
A_23_P380010	0.0315	0.00641	0.545405	STARD9	StAR related lipid transfer domain containing 9
A_23_P105957	0.000714	3.52e-05	0.54506	ACTN1	actinin alpha 1
A_32_P118675	5.38e-07	4.78e-09	0.544486
A_24_P133171	6.6e-05	1.43e-06	0.544238	ELK3	ELK3, ETS transcription factor
A_32_P168701	0.00309	0.000269	0.544235
A_23_P81369	0.0648	0.0171	0.544091	ADAM19	ADAM metallopeptidase domain 19
A_23_P102634	0.000752	3.78e-05	0.543505	WFDC6	WAP four-disulfide core domain 6
A_24_P715826	0.00268	0.000222	0.543393
A_24_P942921	0.000907	4.89e-05	0.543253	UBXN10	UBX domain protein 10
A_23_P164068	0.00537	0.000586	0.542998	DNAH9	dynein axonemal heavy chain 9
A_23_P43490	0.000415	1.64e-05	0.542233	CDKN2A	cyclin dependent kinase inhibitor 2A
A_24_P662646	0.00281	0.000237	0.542167	LOC100505841	zinc finger protein 474-like
A_24_P600036	0.00727	0.000888	0.542152
A_32_P156851	0.011	0.00155	0.542077	RCAN2	regulator of calcineurin 2
A_23_P77212	0.000521	2.25e-05	0.541932	IQCH	IQ motif containing H
A_24_P329815	2.65e-05	4.5e-07	0.541565	AMOTL1	angiomotin like 1
A_23_P371410	0.000401	1.57e-05	0.541171	PRKACB	protein kinase cAMP-activated catalytic subunit beta
A_23_P357983	0.000515	2.2e-05	0.541147	STOML3	stomatin like 3
A_23_P73589	0.000143	3.94e-06	0.541097	MSN	moesin
A_24_P357169	0.000256	8.65e-06	0.540878	EPPK1	epiplakin 1
A_24_P916782	0.0318	0.00649	0.540789
A_23_P7397	0.00192	0.000139	0.540499	PCDHB10	protocadherin beta 10
A_23_P128663	0.00869	0.00112	0.540144	SACS	sacsin molecular chaperone
A_23_P45338	0.00326	0.00029	0.539655	EFHC2	EF-hand domain containing 2
A_23_P354288	0.434	0.264	0.539616	FAM71A	family with sequence similarity 71 member A
A_32_P94695	0.0239	0.00442	0.539459	CTXN2	cortexin 2
A_23_P89799	0.00195	0.000142	0.538783	ACAA2	acetyl-CoA acyltransferase 2
A_32_P86739	0.000336	1.24e-05	0.53823	CASC10	cancer susceptibility candidate 10
A_24_P334300	0.0627	0.0163	0.53797	FGF12	fibroblast growth factor 12
A_23_P29153	0.000384	1.48e-05	0.537632	RSPH14	radial spoke head 14 homolog
A_23_P5103	0.00711	0.000865	0.537419	PSG4	pregnancy specific beta-1-glycoprotein 4
A_23_P163440	0.0395	0.00869	0.537234	MEX3B	mex-3 RNA binding family member B
A_24_P810290	0.0314	0.00638	0.536919	PLPP4	phospholipid phosphatase 4
A_24_P882871	0.00012	3.03e-06	0.536654	FLJ21408	uncharacterized LOC400512
A_23_P73593	0.000166	4.75e-06	0.53652	MSN	moesin
A_23_P42004	0.00103	5.83e-05	0.536171	SLC22A16	solute carrier family 22 member 16
A_23_P70915	0.000155	4.35e-06	0.536059	ORAI2	ORAI calcium release-activated calcium modulator 2
A_24_P564761	0.0389	0.00852	0.535972
A_23_P83175	0.000528	2.3e-05	0.535916	HACD4	3-hydroxyacyl-CoA dehydratase 4
A_24_P21507	0.00025	8.33e-06	0.535781	SPAG6	sperm associated antigen 6
A_24_P915492	0.0732	0.0202	0.535679	INPP4B	inositol polyphosphate-4-phosphatase type II B
A_24_P771821	0.182	0.0733	0.535229
A_23_P312874	0.00186	0.000133	0.534918	SPATS1	spermatogenesis associated serine rich 1
A_32_P141418	0.000775	3.93e-05	0.534764	ARMC4	armadillo repeat containing 4
A_23_P314835	0.00118	7.05e-05	0.533815	C20orf85	chromosome 20 open reading frame 85
A_24_P588897	0.00118	7.03e-05	0.533475	SLCO3A1	solute carrier organic anion transporter family member 3A1
A_23_P423853	0.0441	0.0101	0.53345	ERBB4	erb-b2 receptor tyrosine kinase 4
A_32_P94161	7.32e-06	9.79e-08	0.533444
A_24_P215240	0.000492	2.07e-05	0.533333	ENKUR	enkurin, TRPC channel interacting protein
A_23_P11800	0.00767	0.00096	0.53325	CAMK2N1	calcium/calmodulin dependent protein kinase II inhibitor 1
A_23_P50946	0.0273	0.0053	0.532823	RAMP1	receptor activity modifying protein 1
A_23_P52761	0.0358	0.00759	0.532476	MMP7	matrix metallopeptidase 7
A_23_P311912	3.58e-05	6.48e-07	0.532437	AHNAK2	AHNAK nucleoprotein 2
A_24_P234701	2.33e-05	3.86e-07	0.53219	APBB2	amyloid beta precursor protein binding family B member 2
A_24_P273253	2.72e-05	4.65e-07	0.531937	AHNAK2	AHNAK nucleoprotein 2
A_23_P106322	0.0252	0.00476	0.531797	CPEB1	cytoplasmic polyadenylation element binding protein 1
A_23_P169039	0.00297	0.000255	0.531651	SNAI2	snail family transcriptional repressor 2
A_32_P63086	0.00715	0.00087	0.531397	SKIL	SKI-like proto-oncogene
A_24_P307498	0.000236	7.77e-06	0.530311	ANKRD45	ankyrin repeat domain 45
A_23_P99386	0.00597	0.000681	0.529979	TNFSF11	tumor necrosis factor superfamily member 11
A_24_P920447	6.74e-07	6.23e-09	0.529975
A_24_P275585	4.52e-05	8.66e-07	0.529925	IQCH	IQ motif containing H
A_32_P34444	0.00528	0.000571	0.529805	FHOD3	formin homology 2 domain containing 3
A_24_P238131	5.44e-07	4.94e-09	0.529427	SUSD5	sushi domain containing 5
A_32_P151102	0.0019	0.000136	0.529379	MSN	moesin
A_23_P83388	4.99e-05	9.84e-07	0.529209	EPPK1	epiplakin 1
A_32_P197340	0.00115	6.83e-05	0.528859	ERICH2	glutamate rich 2
A_32_P31757	6.07e-06	7.9e-08	0.528769
A_23_P207245	0.0107	0.00149	0.528671	TEKT3	tektin 3
A_32_P126229	0.000757	3.81e-05	0.528446	STMND1	stathmin domain containing 1
A_23_P394986	0.0136	0.00207	0.528405	CREG2	cellular repressor of E1A stimulated genes 2
A_24_P915908	0.000212	6.63e-06	0.527754	TUSC3	tumor suppressor candidate 3
A_23_P501933	0.00591	0.00067	0.527741	CACNG6	calcium voltage-gated channel auxiliary subunit gamma 6
A_23_P109655	0.0182	0.00307	0.527539	SLC35G2	solute carrier family 35 member G2
A_23_P139146	0.00126	7.69e-05	0.527523	MS4A8	membrane spanning 4-domains A8
A_23_P121622	0.00213	0.000161	0.527318	SULT1B1	sulfotransferase family 1B member 1
A_23_P300033	0.0328	0.00677	0.527144	PDGFRA	platelet derived growth factor receptor alpha
A_24_P297166	0.00619	0.000714	0.526637	2021-09-05	septin 5
A_23_P209578	0.0047	0.000487	0.52579	GAD1	glutamate decarboxylase 1
A_32_P86135	0.000336	1.24e-05	0.525704
A_23_P153320	0.045	0.0104	0.525642	ICAM1	intercellular adhesion molecule 1
A_23_P107283	0.0978	0.0304	0.52528	HOXB2	homeobox B2
A_23_P121716	0.000316	1.16e-05	0.524597	ANXA3	annexin A3
A_32_P20203	1.83e-06	1.88e-08	0.524417
A_23_P501010	2.33e-06	2.52e-08	0.524378	COL17A1	collagen type XVII alpha 1 chain
A_23_P404162	0.0621	0.0161	0.524358	HDAC9	histone deacetylase 9
A_32_P183765	0.00251	0.000203	0.52391	ERBB4	erb-b2 receptor tyrosine kinase 4
A_23_P28927	0.0024	0.000191	0.523767
A_24_P941353	0.00119	7.12e-05	0.523404	PCYT1B	phosphate cytidylyltransferase 1, choline, beta
A_24_P320604	0.00128	7.87e-05	0.523271	ARMC2	armadillo repeat containing 2
A_23_P423482	0.00167	0.000114	0.523026	FAM81A	family with sequence similarity 81 member A
A_23_P73150	0.00303	0.000262	0.522582	TTC25	tetratricopeptide repeat domain 25
A_32_P219279	0.00212	0.00016	0.522301	ELFN2	extracellular leucine rich repeat and fibronectin type III domain containing 2
A_23_P208567	0.000125	3.21e-06	0.522135	PODNL1	podocan like 1
A_32_P229493	0.0822	0.0238	0.521611	ZNF704	zinc finger protein 704
A_23_P7528	0.0213	0.0038	0.521548	DPYSL3	dihydropyrimidinase like 3
A_23_P143331	0.00587	0.000663	0.521444	BMP2	bone morphogenetic protein 2
A_32_P186364	0.0264	0.00505	0.5214	C14orf37	chromosome 14 open reading frame 37
A_24_P236091	0.00158	0.000106	0.520813	ENO2	enolase 2
A_24_P234415	0.0122	0.00179	0.520396	STAC	SH3 and cysteine rich domain
A_24_P803809	2.82e-06	3.22e-08	0.520359
A_32_P225345	0.00341	0.00031	0.520138	C11orf88	chromosome 11 open reading frame 88
A_24_P253003	0.0135	0.00203	0.52003	WNT11	Wnt family member 11
A_24_P393571	0.000115	2.87e-06	0.519788	GDA	guanine deaminase
A_23_P132560	0.00058	2.62e-05	0.518766	NXPE3	neurexophilin and PC-esterase domain family member 3
A_24_P165450	0.000322	1.18e-05	0.51875	TTLL7	tubulin tyrosine ligase like 7
A_23_P29816	0.00135	8.43e-05	0.518722	PLA1A	phospholipase A1 member A
A_24_P235049	0.000601	2.77e-05	0.518666	MTHFD1L	methylenetetrahydrofolate dehydrogenase (NADP+ dependent) 1-like
A_23_P140375	0.0949	0.0291	0.518444	NGB	neuroglobin
A_23_P64161	0.00376	0.000358	0.518252	ANGPTL5	angiopoietin like 5
A_23_P324605	0.00127	7.8e-05	0.517958	DNAH6	dynein axonemal heavy chain 6
A_23_P317620	0.0244	0.00455	0.517488	ARL4C	ADP ribosylation factor like GTPase 4C
A_23_P3295	0.00142	9.06e-05	0.517467	FAM81A	family with sequence similarity 81 member A
A_23_P99642	0.000553	2.46e-05	0.517466	SLC7A7	solute carrier family 7 member 7
A_24_P393312	9.06e-05	2.1e-06	0.517287	KIRREL	kin of IRRE like (Drosophila)
A_23_P208158	0.000602	2.77e-05	0.517188	DTNA	dystrobrevin alpha
A_23_P126782	0.0843	0.0247	0.517106	F3	coagulation factor III, tissue factor
A_23_P130743	0.0059	0.000667	0.516359	DKKL1	dickkopf like acrosomal protein 1
A_24_P179504	0.000507	2.16e-05	0.515669	WDR66	WD repeat domain 66
A_23_P363275	0.00122	7.37e-05	0.515502	WDR66	WD repeat domain 66
A_32_P185229	0.00181	0.000127	0.515042	ATP8B2	ATPase phospholipid transporting 8B2
A_32_P13991	2.94e-06	3.39e-08	0.51487
A_23_P153964	0.0251	0.00472	0.514772	INHBB	inhibin beta B subunit
A_23_P339240	0.000494	2.08e-05	0.514758	PLCH1	phospholipase C eta 1
A_23_P332340	0.000313	1.13e-05	0.514514	MORN3	MORN repeat containing 3
A_23_P71530	0.00752	0.000932	0.514318	TNFRSF11B	TNF receptor superfamily member 11b
A_23_P360354	0.00074	3.7e-05	0.513915	FAM81B	family with sequence similarity 81 member B
A_24_P753760	0.000132	3.49e-06	0.513653
A_24_P185854	0.000105	2.52e-06	0.513498	DMD	dystrophin
A_23_P331072	0.000439	1.78e-05	0.513392	LRRIQ3	leucine rich repeats and IQ motif containing 3
A_23_P409287	0.0316	0.00643	0.513373	HNF1B	HNF1 homeobox B
A_24_P89457	0.00122	7.36e-05	0.513322	CDKN1A	cyclin dependent kinase inhibitor 1A
A_32_P71476	0.000449	1.83e-05	0.512538
A_23_P347632	0.00013	3.41e-06	0.512114	MTSS1	metastasis suppressor 1
A_32_P102519	0.00202	0.00015	0.512111	LOC541473	FK506 binding protein 6, 36kDa pseudogene
A_23_P19102	0.0572	0.0144	0.512062
A_23_P10701	4.23e-07	3.62e-09	0.512033	APBB2	amyloid beta precursor protein binding family B member 2
A_32_P472968	0.00773	0.000968	0.511974	BICD1	BICD cargo adaptor 1
A_23_P151529	7.24e-07	6.71e-09	0.511664
A_24_P234242	0.00889	0.00116	0.511614	ACADL	acyl-CoA dehydrogenase, long chain
A_24_P505790	0.00565	0.000627	0.511456	ZNF704	zinc finger protein 704
A_32_P227216	0.00149	9.76e-05	0.511263	LINC00643	long intergenic non-protein coding RNA 643
A_32_P140501	0.0192	0.00331	0.510969
A_24_P110983	0.00565	0.000627	0.510801	AKT3	AKT serine/threonine kinase 3
A_32_P62963	0.00364	0.000342	0.510732	KRT16P2	keratin 16 pseudogene 2
A_23_P135826	0.000626	2.93e-05	0.510538	ZNF93	zinc finger protein 93
A_24_P392496	0.00109	6.28e-05	0.509558	LOC100133920	methylenetetrahydrofolate dehydrogenase (NADP+ dependent) 1-like pseudogene
A_23_P69310	0.115	0.0382	0.509543	CCRL2	C-C motif chemokine receptor like 2
A_23_P95359	0.0182	0.00308	0.509298	DNAJC6	DnaJ heat shock protein family (Hsp40) member C6
A_23_P382584	0.0435	0.00991	0.509265	CHGB	chromogranin B
A_32_P31206	0.0572	0.0144	0.509254
A_23_P141730	2.14e-07	1.6e-09	0.508839	DSG2	desmoglein 2
A_23_P210763	0.00096	5.31e-05	0.507906	JAG1	jagged 1
A_23_P113793	0.0393	0.00864	0.507897	ZBED2	zinc finger BED-type containing 2
A_24_P178084	0.0103	0.00141	0.507868
A_24_P212024	8.28e-06	1.12e-07	0.507207
A_23_P49627	0.000196	5.96e-06	0.506997	MRC2	mannose receptor C type 2
A_23_P86540	0.00281	0.000236	0.506736	ARMC3	armadillo repeat containing 3
A_23_P110686	0.0251	0.00472	0.506715	STC2	stanniocalcin 2
A_23_P160354	0.111	0.0362	0.506592	AKT3	AKT serine/threonine kinase 3
A_23_P430068	0.0113	0.0016	0.506081	PDPN	podoplanin
A_23_P19333	0.0136	0.00207	0.505998	TREM1	triggering receptor expressed on myeloid cells 1
A_24_P272254	0.0256	0.00486	0.505903	SPACA5	sperm acrosome associated 5
A_23_P26386	0.00292	0.00025	0.505854	TPPP3	tubulin polymerization promoting protein family member 3
A_23_P211273	0.00229	0.000179	0.505762	TMPRSS3	transmembrane protease, serine 3
A_23_P401774	0.00777	0.000976	0.505607	ELMOD1	ELMO domain containing 1
A_24_P812172	0.121	0.0409	0.505447
A_24_P65941	0.0373	0.00806	0.504121	RUNX1-IT1	RUNX1 intronic transcript 1
A_24_P297816	0.00903	0.00119	0.503565	KIF6	kinesin family member 6
A_23_P122724	0.00554	0.000611	0.503132	VNN2	vanin 2
A_23_P346912	0.000128	3.31e-06	0.502878	SPATA17	spermatogenesis associated 17
A_23_P49097	0.0913	0.0276	0.502739	IL17C	interleukin 17C
A_23_P47340	0.0759	0.0213	0.502695	DSCAML1	DS cell adhesion molecule like 1
A_23_P383258	8.34e-05	1.89e-06	0.502329	GDA	guanine deaminase
A_23_P114423	0.038	0.00825	0.502269	RGN	regucalcin
A_32_P214274	0.00734	0.000899	0.502194	KIF6	kinesin family member 6
A_32_P395992	0.0107	0.00148	0.502038	2021-12-01	deleted in esophageal cancer 1
A_24_P390096	0.0176	0.00295	0.501791	GLIPR1	GLI pathogenesis related 1
A_23_P11984	0.00305	0.000265	0.501731	SLC6A9	solute carrier family 6 member 9
A_24_P55295	0.00715	0.00087	0.501724	GJA1	gap junction protein alpha 1
A_23_P6321	0.0385	0.0084	0.501557	CLDN5	claudin 5
A_23_P404536	0.000258	8.73e-06	0.500995	ENPP3	ectonucleotide pyrophosphatase/phosphodiesterase 3
A_32_P231617	0.00116	6.89e-05	0.500126	TM4SF1	transmembrane 4 L six family member 1
A_24_P522998	0.00193	0.00014	0.499211	ERICH3	glutamate rich 3
A_32_P85732	0.000495	2.09e-05	0.499208	C9orf135	chromosome 9 open reading frame 135
A_23_P356425	0.0351	0.00739	0.499091	AXDND1	axonemal dynein light chain domain containing 1
A_23_P144896	0.00943	0.00126	0.498946	PDLIM7	PDZ and LIM domain 7
A_23_P362148	0.00259	0.000213	0.498855	DNER	delta/notch like EGF repeat containing
A_23_P360079	0.0406	0.00903	0.498683	NCKAP5	NCK associated protein 5
A_32_P227870	0.000175	5.1e-06	0.498653	SLC30A4	solute carrier family 30 member 4
A_23_P41194	0.000519	2.22e-05	0.498454	LRRC34	leucine rich repeat containing 34
A_23_P33947	0.000284	9.96e-06	0.498094	EFHC2	EF-hand domain containing 2
A_24_P554882	0.0356	0.00755	0.497443
A_24_P264832	0.00335	0.000303	0.496838	NEFM	neurofilament, medium polypeptide
A_32_P475462	0.000601	2.76e-05	0.496737	CLDN16	claudin 16
A_32_P66934	1.58e-06	1.6e-08	0.496706
A_23_P73493	0.000102	2.44e-06	0.496606	CETN2	centrin 2
A_23_P308722	0.00154	0.000103	0.496469	DRC1	dynein regulatory complex subunit 1
A_32_P229618	0.000692	3.36e-05	0.496429	DLG2	discs large MAGUK scaffold protein 2
A_24_P231074	0.00271	0.000225	0.496179	DNAH6	dynein axonemal heavy chain 6
A_23_P430051	2.52e-05	4.25e-07	0.496152	NGLY1	N-glycanase 1
A_32_P307211	0.0916	0.0278	0.495477	GAS5-AS1	GAS5 antisense RNA 1
A_23_P134162	0.035	0.00736	0.495097	DCDC2	doublecortin domain containing 2
A_23_P364597	0.00627	0.000726	0.494897	CCDC13	coiled-coil domain containing 13
A_32_P202759	0.00065	3.1e-05	0.494734	FAM171B	family with sequence similarity 171 member B
A_32_P41924	0.00104	5.91e-05	0.494674	KCNQ1OT1	KCNQ1 opposite strand/antisense transcript 1 (non-protein coding)
A_32_P207903	0.0124	0.00182	0.494562
A_23_P212781	0.000206	6.36e-06	0.493829
A_24_P248240	0.0928	0.0282	0.493748	SYT11	synaptotagmin 11
A_32_P404549	0.00281	0.000236	0.493559	CCDC39	coiled-coil domain containing 39
A_23_P25030	0.00562	0.000623	0.492575	HSD17B6	hydroxysteroid 17-beta dehydrogenase 6
A_23_P61623	0.00201	0.000149	0.49218	SLCO3A1	solute carrier organic anion transporter family member 3A1
A_24_P784765	0.00136	8.5e-05	0.491077	CD59	CD59 molecule
A_23_P351888	0.0112	0.00159	0.490977	KIF6	kinesin family member 6
A_23_P257365	0.0722	0.0198	0.490944	GFI1	growth factor independent 1 transcriptional repressor
A_23_P2083	0.00521	0.000562	0.490677	ASCL3	achaete-scute family bHLH transcription factor 3
A_23_P353125	0.000349	1.3e-05	0.490517	FSIP1	fibrous sheath interacting protein 1
A_32_P163089	4.49e-05	8.56e-07	0.490497	C12orf75	chromosome 12 open reading frame 75
A_24_P162485	0.0363	0.00776	0.490338	ANK1	ankyrin 1
A_32_P115382	0.0644	0.017	0.490313	KCNB1	potassium voltage-gated channel subfamily B member 1
A_24_P283341	0.00871	0.00113	0.490288	MICAL1	microtubule associated monooxygenase, calponin and LIM domain containing 1
A_24_P297551	0.00877	0.00114	0.490066	FAM19A2	family with sequence similarity 19 member A2, C-C motif chemokine like
A_32_P49516	0.00487	0.000512	0.490066
A_24_P345958	0.000529	2.31e-05	0.489964	SPATA18	spermatogenesis associated 18
A_32_P155832	0.000677	3.26e-05	0.489793
A_23_P19987	0.0269	0.00517	0.489549	IGF2BP3	insulin like growth factor 2 mRNA binding protein 3
A_32_P226457	0.00337	0.000306	0.489506
A_32_P46603	0.00416	0.00041	0.489259	VWA3B	von Willebrand factor A domain containing 3B
A_23_P252388	0.00374	0.000354	0.489256	SPEF2	sperm flagellar 2
A_23_P149476	0.00011	2.67e-06	0.488974	EFCAB2	EF-hand calcium binding domain 2
A_23_P133438	0.0347	0.0073	0.488948	FAM105A	family with sequence similarity 105 member A
A_23_P255701	0.00478	0.000499	0.488711	DRC3	dynein regulatory complex subunit 3
A_23_P97481	0.00259	0.000212	0.488432	TTLL7	tubulin tyrosine ligase like 7
A_23_P254140	0.00206	0.000154	0.488388	ARMC2	armadillo repeat containing 2
A_24_P409013	0.00113	6.62e-05	0.487615	WDR78	WD repeat domain 78
A_32_P199796	0.00523	0.000564	0.487606	DMD	dystrophin
A_24_P934679	2.04e-05	3.28e-07	0.487605
A_32_P224727	0.0118	0.00172	0.48712
A_23_P344481	0.000102	2.45e-06	0.486811	STOX1	storkhead box 1
A_32_P28284	0.000204	6.28e-06	0.486809	TPM4	tropomyosin 4
A_23_P204133	0.00511	0.000546	0.486677	GALNT6	polypeptide N-acetylgalactosaminyltransferase 6
A_24_P494425	4.1e-05	7.68e-07	0.486523
A_24_P303454	0.0159	0.00254	0.486376	TIAM2	T-cell lymphoma invasion and metastasis 2
A_32_P101313	0.000683	3.3e-05	0.485889	HACD4	3-hydroxyacyl-CoA dehydratase 4
A_23_P50250	0.0141	0.00216	0.48567	CKM	creatine kinase, M-type
A_24_P63078	0.000294	1.05e-05	0.48559	MAP3K19	mitogen-activated protein kinase kinase kinase 19
A_24_P81965	0.314	0.164	0.485441	RAP2A	RAP2A, member of RAS oncogene family
A_32_P36694	0.000528	2.3e-05	0.484462	JAZF1	JAZF zinc finger 1
A_23_P77304	0.0784	0.0222	0.484222	AP3B2	adaptor related protein complex 3 beta 2 subunit
A_23_P25706	0.000871	4.6e-05	0.483829	CLMN	calmin
A_23_P59210	0.00468	0.000483	0.483691	CDKN1A	cyclin dependent kinase inhibitor 1A
A_23_P23611	0.000259	8.78e-06	0.483639	AMY1C	amylase, alpha 1C (salivary)
A_24_P220921	0.0042	0.000416	0.483439	CAMTA1	calmodulin binding transcription activator 1
A_23_P110403	0.0757	0.0212	0.48317	PDLIM3	PDZ and LIM domain 3
A_32_P215700	0.000572	2.56e-05	0.48309	PIFO	primary cilia formation
A_24_P349145	0.00147	9.58e-05	0.48302	CCDC173	coiled-coil domain containing 173
A_23_P94840	0.00174	0.000121	0.483	DYNLRB2	dynein light chain roadblock-type 2
A_24_P410399	0.00206	0.000154	0.482911	LRRIQ1	leucine rich repeats and IQ motif containing 1
A_23_P93514	0.00142	9.12e-05	0.482788	CCDC170	coiled-coil domain containing 170
A_23_P141974	0.000181	5.35e-06	0.482686	TPM4	tropomyosin 4
A_24_P207995	0.059	0.015	0.482628	L1CAM	L1 cell adhesion molecule
A_32_P113472	0.0413	0.00924	0.482417
A_24_P941339	0.00679	0.00081	0.482105	KCNE1	potassium voltage-gated channel subfamily E regulatory subunit 1
A_23_P257871	0.000884	4.69e-05	0.481987	DAB2	DAB2, clathrin adaptor protein
A_23_P256724	0.0151	0.00238	0.481965	TNFRSF10C	TNF receptor superfamily member 10c
A_32_P46544	2.14e-08	1.23e-10	0.481834
A_23_P128304	0.000395	1.55e-05	0.481824	BICD1	BICD cargo adaptor 1
A_23_P73311	0.00629	0.000729	0.481384	C8orf34	chromosome 8 open reading frame 34
A_23_P163455	0.00144	9.35e-05	0.480924	MAP1A	microtubule associated protein 1A
A_32_P170454	0.00161	0.000109	0.480872	LOC283454	uncharacterized LOC283454
A_32_P224327	0.00124	7.49e-05	0.480765	LINC00886	long intergenic non-protein coding RNA 886
A_32_P195924	6.34e-09	3.15e-11	0.480546
A_32_P61480	0.00221	0.00017	0.480381	CASC2	cancer susceptibility candidate 2 (non-protein coding)
A_24_P401491	0.000822	4.25e-05	0.480324	MORN5	MORN repeat containing 5
A_24_P158536	0.00641	0.000748	0.480289	RHOBTB1	Rho related BTB domain containing 1
A_24_P147927	0.000315	1.15e-05	0.480164	EFHC2	EF-hand domain containing 2
A_23_P45304	0.00224	0.000173	0.479511	XK	X-linked Kx blood group
A_32_P497742	0.00545	0.000599	0.479376	GPR161	G protein-coupled receptor 161
A_23_P257668	0.000208	6.45e-06	0.479352	TTC26	tetratricopeptide repeat domain 26
A_23_P108180	0.00409	0.000399	0.479039	GRIN3B	glutamate ionotropic receptor NMDA type subunit 3B
A_23_P70643	0.00184	0.00013	0.478835	ADGB	androglobin
A_24_P388786	0.00195	0.000142	0.478571	DNAH5	dynein axonemal heavy chain 5
A_24_P476215	0.00278	0.000233	0.478382
A_24_P62659	0.0122	0.00178	0.478289	TSPAN2	tetraspanin 2
A_32_P119744	0.000307	1.1e-05	0.478169	DUBR	DPPA2 upstream binding RNA
A_23_P379789	0.0048	0.000501	0.478133	ST8SIA5	ST8 alpha-N-acetyl-neuraminide alpha-2,8-sialyltransferase 5
A_32_P184916	0.00196	0.000143	0.477944	GNB4	G protein subunit beta 4
A_23_P385980	0.00568	0.000632	0.477943	CFAP206	cilia and flagella associated protein 206
A_24_P847326	0.00237	0.000187	0.477364	FAM183A	family with sequence similarity 183 member A
A_23_P348383	0.00193	0.00014	0.477081	CC2D2A	coiled-coil and C2 domain containing 2A
A_23_P80817	0.000476	1.97e-05	0.47683	TAGLN3	transgelin 3
A_23_P18966	0.00052	2.24e-05	0.476649	P4HA2	prolyl 4-hydroxylase subunit alpha 2
A_23_P124585	0.000913	4.95e-05	0.476432	ZNF93	zinc finger protein 93
A_32_P167825	0.12	0.0405	0.476076
A_24_P42603	0.000607	2.81e-05	0.475932	TRIO	trio Rho guanine nucleotide exchange factor
A_24_P912136	1.95e-05	3.12e-07	0.475859
A_24_P334248	0.00539	0.00059	0.475733	PLCH1	phospholipase C eta 1
A_24_P778906	0.0308	0.00622	0.475657
A_23_P158318	0.00616	0.00071	0.47565	ROR2	receptor tyrosine kinase like orphan receptor 2
A_24_P924681	0.0233	0.00429	0.475608
A_23_P166147	0.000506	2.15e-05	0.475544	FAM182B	family with sequence similarity 182 member B
A_24_P206776	0.00445	0.00045	0.475191	CRYAB	crystallin alpha B
A_23_P73413	0.065	0.0172	0.475041	SLC26A7	solute carrier family 26 member 7
A_23_P158885	0.000968	5.38e-05	0.474976	ZNF93	zinc finger protein 93
A_23_P383679	0.00554	0.000612	0.474533
A_23_P200067	4.59e-05	8.81e-07	0.474368	EPHB2	EPH receptor B2
A_23_P359214	0.0011	6.35e-05	0.47426	LINC00842	long intergenic non-protein coding RNA 842
A_32_P216820	0.00183	0.000129	0.474087	CCEPR	cervical carcinoma expressed PCNA regulatory lncRNA
A_23_P65678	0.0198	0.00345	0.474038	FBN1	fibrillin 1
A_23_P383915	0.000509	2.17e-05	0.473818	BTBD16	BTB domain containing 16
A_24_P363278	0.00303	0.000263	0.473483	MAK	male germ cell associated kinase
A_24_P196188	0.107	0.0345	0.473353	NXPH4	neurexophilin 4
A_23_P80551	0.0115	0.00165	0.473332	KRBOX1	KRAB box domain containing 1
A_23_P133536	0.000528	2.3e-05	0.473165	CAPSL	calcyphosine like
A_23_P17724	0.00229	0.000179	0.472379	2021-09-05	septin 5
A_23_P121596	0.156	0.0588	0.472176	PPBP	pro-platelet basic protein
A_23_P10559	0.0243	0.00452	0.471976	AATK	apoptosis associated tyrosine kinase
A_32_P66908	0.00329	0.000295	0.471747
A_23_P124514	0.00898	0.00118	0.47173	DLG2	discs large MAGUK scaffold protein 2
A_23_P312999	0.00154	0.000103	0.471365	C4orf22	chromosome 4 open reading frame 22
A_24_P73109	0.0261	0.005	0.471304	GLB1L2	galactosidase beta 1 like 2
A_23_P411825	0.00114	6.72e-05	0.471251	CCDC148	coiled-coil domain containing 148
A_32_P316545	0.0372	0.00802	0.471084	ANKFN1	ankyrin repeat and fibronectin type III domain containing 1
A_23_P146294	0.00455	0.000463	0.470928	EFCAB1	EF-hand calcium binding domain 1
A_23_P396818	0.00422	0.000419	0.470898	GAS2L2	growth arrest specific 2 like 2
A_23_P82651	0.096	0.0296	0.470826	NPTX2	neuronal pentraxin 2
A_32_P165974	0.00181	0.000127	0.470706	GRM7	glutamate metabotropic receptor 7
A_24_P345679	0.000414	1.64e-05	0.470513	MLF1	myeloid leukemia factor 1
A_32_P211418	0.000828	4.31e-05	0.470477	PIH1D3	PIH1 domain containing 3
A_32_P233688	0.00413	0.000404	0.470352	C20orf85	chromosome 20 open reading frame 85
A_23_P390445	0.00912	0.0012	0.470303	PPP1R1C	protein phosphatase 1 regulatory inhibitor subunit 1C
A_24_P854643	0.125	0.0429	0.469809
A_23_P350678	0.00315	0.000277	0.469758	CFAP43	cilia and flagella associated protein 43
A_24_P941824	4.75e-09	2.26e-11	0.46955	KIF3B	kinesin family member 3B
A_24_P146138	0.000831	4.33e-05	0.468926	PCDHA1	protocadherin alpha 1
A_32_P37474	6.06e-05	1.28e-06	0.468882
A_32_P170621	0.000597	2.72e-05	0.468874	CASC2	cancer susceptibility candidate 2 (non-protein coding)
A_32_P223140	0.00343	0.000313	0.468861	RASGEF1A	RasGEF domain family member 1A
A_24_P55092	3.72e-05	6.8e-07	0.468659	CD109	CD109 molecule
A_32_P201723	0.0814	0.0234	0.468108
A_23_P99747	0.00245	0.000197	0.468079	CDKL1	cyclin dependent kinase like 1
A_23_P70719	0.012	0.00175	0.467964	LAMA2	laminin subunit alpha 2
A_23_P131825	0.00157	0.000105	0.467917	TNNC2	troponin C2, fast skeletal type
A_24_P117896	0.000119	2.96e-06	0.467669	ATP8B2	ATPase phospholipid transporting 8B2
A_23_P211973	0.000968	5.38e-05	0.467662	NEK11	NIMA related kinase 11
A_23_P205746	0.00143	9.19e-05	0.466805	EML1	echinoderm microtubule associated protein like 1
A_24_P84498	0.00113	6.62e-05	0.46587	EFCAB10	EF-hand calcium binding domain 10
A_24_P3415	0.0355	0.00751	0.465731	PPP2R2C	protein phosphatase 2 regulatory subunit Bgamma
A_24_P256404	0.0104	0.00143	0.465652	LOC440570	uncharacterized LOC440570
A_24_P324520	0.0324	0.00664	0.46562	MTCP1	mature T-cell proliferation 1
A_23_P434398	0.00701	0.000847	0.465211	TXLNB	taxilin beta
A_24_P199774	0.00316	0.000278	0.46502	TINAGL1	tubulointerstitial nephritis antigen like 1
A_32_P83049	0.00182	0.000129	0.464961	EFR3B	EFR3 homolog B
A_23_P24555	0.0147	0.00229	0.464821	PHLDB1	pleckstrin homology like domain family B member 1
A_23_P57577	0.104	0.0331	0.464624	SULT4A1	sulfotransferase family 4A member 1
A_24_P408424	0.00073	3.63e-05	0.464507	MYH9	myosin, heavy chain 9, non-muscle
A_24_P281988	0.0249	0.00466	0.46424	PLCL2	phospholipase C like 2
A_23_P26954	4.85e-05	9.49e-07	0.464224	VAT1	vesicle amine transport 1
A_32_P80523	1.41e-05	2.12e-07	0.463799
A_23_P26024	0.013	0.00195	0.463649	C15orf48	chromosome 15 open reading frame 48
A_24_P308229	0.00118	7.05e-05	0.463143	AIM1L	absent in melanoma 1-like
A_23_P350782	0.00287	0.000244	0.463097
A_32_P138833	0.000196	5.94e-06	0.463065	KIAA0825	KIAA0825
A_23_P26037	0.0129	0.00193	0.463021	FRMD5	FERM domain containing 5
A_23_P84744	0.00227	0.000176	0.462984	HYDIN	HYDIN, axonemal central pair apparatus protein
A_24_P240242	0.000177	5.17e-06	0.462764	MAP4	microtubule associated protein 4
A_23_P433865	0.144	0.0523	0.462584	C2	complement component 2
A_23_P376488	0.0632	0.0165	0.462547	TNF	tumor necrosis factor
A_23_P200928	0.00333	0.0003	0.462535	NID1	nidogen 1
A_32_P82383	0.229	0.103	0.462531
A_23_P52986	0.0701	0.0191	0.462522	VWCE	von Willebrand factor C and EGF domains
A_32_P71744	2.83e-05	4.89e-07	0.462444
A_23_P360329	0.00184	0.000131	0.462416	AIM1L	absent in melanoma 1-like
A_23_P155755	0.0934	0.0285	0.462275	CXCL6	C-X-C motif chemokine ligand 6
A_32_P219635	0.179	0.0716	0.461773	KCNMB4	potassium calcium-activated channel subfamily M regulatory beta subunit 4
A_23_P30200	0.00362	0.000338	0.461625	PCDHB16	protocadherin beta 16
A_32_P17182	0.0282	0.00554	0.461339
A_23_P158041	0.00184	0.000131	0.461234	AQP7	aquaporin 7
A_23_P30363	0.002	0.000147	0.460974	P4HA2	prolyl 4-hydroxylase subunit alpha 2
A_23_P141376	5.83e-05	1.21e-06	0.460332	PTRF	polymerase I and transcript release factor
A_32_P351037	0.0752	0.021	0.46033	DNAH7	dynein axonemal heavy chain 7
A_24_P340954	0.00172	0.000119	0.460183	ANKUB1	ankyrin repeat and ubiquitin domain containing 1
A_24_P395610	0.00589	0.000666	0.460154	GAS7	growth arrest specific 7
A_23_P111260	0.0529	0.013	0.45999	NT5E	5'-nucleotidase ecto
A_24_P220485	0.00783	0.000987	0.459506	OLFML2A	olfactomedin like 2A
A_23_P310956	0.0407	0.00909	0.45903	COL6A2	collagen type VI alpha 2 chain
A_23_P250122	0.000945	5.2e-05	0.458949	FAM20C	family with sequence similarity 20 member C
A_32_P90615	0.00601	0.000687	0.458893
A_24_P291826	0.00284	0.00024	0.458638	SYTL3	synaptotagmin like 3
A_24_P336983	0.114	0.0375	0.458364	CAPN13	calpain 13
A_23_P49391	0.0248	0.00466	0.458283	TP53TG3	TP53 target 3
A_23_P56213	0.00148	9.67e-05	0.458062	GRAMD1A	GRAM domain containing 1A
A_24_P22800	0.485	0.313	0.45786	PSG11	pregnancy specific beta-1-glycoprotein 11
A_24_P510138	0.0557	0.0139	0.457792
A_23_P211727	0.0145	0.00225	0.457403	FGF12	fibroblast growth factor 12
A_23_P423989	0.0206	0.00364	0.457344	VWA3B	von Willebrand factor A domain containing 3B
A_23_P256084	0.141	0.051	0.457251	ARSE	arylsulfatase E (chondrodysplasia punctata 1)
A_23_P313652	0.000927	5.05e-05	0.457199	AKAP14	A-kinase anchoring protein 14
A_23_P396724	0.00193	0.00014	0.457005	LRRC43	leucine rich repeat containing 43
A_32_P74579	0.00861	0.00111	0.455719	GAS2L2	growth arrest specific 2 like 2
A_23_P35205	0.000521	2.25e-05	0.455475	RCAN3	RCAN family member 3
A_24_P399220	0.122	0.0413	0.455432	HOXB3	homeobox B3
A_24_P149036	0.021	0.00374	0.455364	DPYSL3	dihydropyrimidinase like 3
A_32_P185140	0.0679	0.0183	0.455276	TPM1	tropomyosin 1 (alpha)
A_23_P331479	0.000191	5.74e-06	0.455091	PPP1R18	protein phosphatase 1 regulatory subunit 18
A_24_P203298	0.000102	2.43e-06	0.454719	IQUB	IQ motif and ubiquitin domain containing
A_23_P13083	0.00245	0.000197	0.454648	BARX2	BARX homeobox 2
A_32_P156786	0.00247	0.000198	0.454367
A_23_P433855	0.053	0.013	0.454351	RGS4	regulator of G-protein signaling 4
A_32_P49035	0.0139	0.00212	0.453897
A_23_P149019	0.0182	0.00307	0.453691
A_32_P449380	0.00278	0.000233	0.45369	WDR38	WD repeat domain 38
A_23_P144796	6.46e-05	1.39e-06	0.453249	PDLIM4	PDZ and LIM domain 4
A_24_P68358	0.00535	0.000582	0.453179	AIM1L	absent in melanoma 1-like
A_24_P153840	0.134	0.0471	0.452974	FGD3	FYVE, RhoGEF and PH domain containing 3
A_32_P15898	0.00065	3.1e-05	0.452891
A_24_P933580	0.342	0.185	0.452874	NAV2	neuron navigator 2
A_32_P539599	0.000954	5.27e-05	0.452821	WEE2-AS1	WEE2 antisense RNA 1
A_23_P101972	0.132	0.0463	0.452587	CAPN13	calpain 13
A_32_P67526	0.00173	0.000119	0.452507
A_24_P331704	0.0182	0.00307	0.452495	KRT80	keratin 80
A_24_P883577	0.175	0.0694	0.452423
A_23_P93169	0.0391	0.00856	0.452126	LGSN	lengsin, lens protein with glutamine synthetase domain
A_23_P85664	0.00435	0.000436	0.451963	UBXN10	UBX domain protein 10
A_32_P171313	0.00327	0.000292	0.451907	GNB4	G protein subunit beta 4
A_23_P141021	0.000822	4.26e-05	0.45188	LPCAT2	lysophosphatidylcholine acyltransferase 2
A_23_P108216	0.0314	0.00638	0.451667	FXYD1	FXYD domain containing ion transport regulator 1
A_24_P256219	0.0436	0.00995	0.451659	MAF	MAF bZIP transcription factor
A_24_P391991	0.00289	0.000246	0.451188	FAM183BP	acyloxyacyl hydrolase (neutrophil)
A_23_P36100	0.00692	0.000831	0.450476	CNTF	ciliary neurotrophic factor
A_32_P66364	0.00565	0.000629	0.449783	PPP1R1C	protein phosphatase 1 regulatory inhibitor subunit 1C
A_32_P134402	3.27e-06	3.83e-08	0.449727	EIF4A2	eukaryotic translation initiation factor 4A2
A_32_P62773	0.0185	0.00315	0.449531
A_23_P49499	2.62e-05	4.44e-07	0.449503	ST6GALNAC2	ST6 N-acetylgalactosaminide alpha-2,6-sialyltransferase 2
A_23_P337934	0.000337	1.25e-05	0.448963	FBLIM1	filamin binding LIM protein 1
A_32_P207481	0.013	0.00194	0.448639	KALRN	kalirin, RhoGEF kinase
A_24_P73730	0.00187	0.000134	0.448442	CCDC113	coiled-coil domain containing 113
A_23_P407112	0.00294	0.000252	0.448278	SPATA18	spermatogenesis associated 18
A_32_P88231	0.00192	0.000138	0.448114
A_23_P203920	0.000748	3.75e-05	0.447893	SSPN	sarcospan
A_23_P71017	0.000535	2.34e-05	0.44784	CLDN3	claudin 3
A_23_P210690	0.03	0.00601	0.447826	TRIB3	tribbles pseudokinase 3
A_24_P135841	0.00374	0.000354	0.447382	RAET1E-AS1	RAET1E antisense RNA 1
A_32_P410753	0.00206	0.000154	0.447337
A_23_P4074	0.00107	6.12e-05	0.447238	CFAP52	cilia and flagella associated protein 52
A_23_P326319	0.000588	2.67e-05	0.446951	C16orf45	chromosome 16 open reading frame 45
A_23_P207939	0.00811	0.00103	0.446898	LDLRAD4	low density lipoprotein receptor class A domain containing 4
A_24_P364807	0.00146	9.52e-05	0.446684	LPCAT2	lysophosphatidylcholine acyltransferase 2
A_23_P407551	0.00153	0.000101	0.446593	BICD2	BICD cargo adaptor 2
A_23_P419947	0.000544	2.4e-05	0.446392	MLF1	myeloid leukemia factor 1
A_23_P422115	0.00254	0.000207	0.445682	C9orf116	chromosome 9 open reading frame 116
A_23_P67847	0.0136	0.00207	0.445656	GALNT14	polypeptide N-acetylgalactosaminyltransferase 14
A_23_P168259	0.000354	1.33e-05	0.445379	ULBP2	UL16 binding protein 2
A_24_P160680	0.00219	0.000167	0.445046	CCDC40	coiled-coil domain containing 40
A_24_P316430	0.142	0.0511	0.444704	NT5E	5'-nucleotidase ecto
A_32_P99690	0.000837	4.38e-05	0.444682	NLN	neurolysin
A_24_P101282	0.0598	0.0153	0.444276	HOTAIRM1	HOXA transcript antisense RNA, myeloid-specific 1
A_23_P216108	0.00676	0.000804	0.444185	ANK1	ankyrin 1
A_32_P36905	0.00227	0.000176	0.444097
A_24_P944570	0.0644	0.017	0.443796	PXDN	peroxidasin
A_23_P156180	0.00192	0.000138	0.443745	SLC22A4	solute carrier family 22 member 4
A_23_P217379	0.00142	9.06e-05	0.443673	COL4A6	collagen type IV alpha 6 chain
A_32_P82845	0.00667	0.00079	0.443603
A_23_P364504	0.027	0.00521	0.443565
A_23_P155301	0.000989	5.53e-05	0.443556	NEK11	NIMA related kinase 11
A_23_P26928	0.00205	0.000153	0.443426	FAM187A	family with sequence similarity 187 member A
A_24_P203479	0.000428	1.71e-05	0.443399	MSH3	mutS homolog 3
A_32_P51119	0.000407	1.6e-05	0.443058	STOX1	storkhead box 1
A_23_P57323	0.00977	0.00131	0.442965	ERG	ERG, ETS transcription factor
A_23_P160567	0.000903	4.84e-05	0.442909	ZMYND12	zinc finger MYND-type containing 12
A_23_P503072	0.00514	0.00055	0.44261	CCL28	C-C motif chemokine ligand 28
A_23_P16798	0.000322	1.18e-05	0.442217	PFN4	profilin family member 4
A_23_P424900	0.000711	3.48e-05	0.442124	PIFO	primary cilia formation
A_23_P43095	0.0543	0.0135	0.442076	ZFHX4	zinc finger homeobox 4
A_32_P201212	2.16e-05	3.53e-07	0.441942	CETN4P	centrin 4, pseudogene
A_23_P47904	0.000956	5.28e-05	0.441835	CCDC65	coiled-coil domain containing 65
A_23_P393620	0.0306	0.00617	0.441792	TFPI2	tissue factor pathway inhibitor 2
A_23_P143906	0.00114	6.72e-05	0.441685	MLF1	myeloid leukemia factor 1
A_32_P70315	0.00691	0.000829	0.441535	TIMP4	TIMP metallopeptidase inhibitor 4
A_24_P294343	0.00029	1.02e-05	0.441344	C3orf52	chromosome 3 open reading frame 52
A_23_P200670	0.000989	5.53e-05	0.441126	WDR78	WD repeat domain 78
A_23_P369994	0.00452	0.000458	0.441053	DCLK1	doublecortin like kinase 1
A_32_P55871	0.00345	0.000316	0.440956	MAATS1	MYCBP associated and testis expressed 1
A_23_P500892	0.00219	0.000167	0.440227	TUB	tubby bipartite transcription factor
A_23_P102950	0.00453	0.00046	0.440165	RSPH1	radial spoke head 1 homolog
A_24_P920904	9.47e-06	1.31e-07	0.440057	C8orf59	chromosome 8 open reading frame 59
A_32_P332551	0.00162	0.00011	0.439923	FAM216B	family with sequence similarity 216 member B
A_32_P34920	0.0838	0.0244	0.439826	FOXD1	forkhead box D1
A_32_P489986	0.00286	0.000242	0.439426	TMEM232	transmembrane protein 232
A_23_P142796	0.0256	0.00485	0.439344	LIMS2	LIM zinc finger domain containing 2
A_23_P501276	0.000259	8.83e-06	0.439267	TUBB2A	tubulin beta 2A class IIa
A_24_P639629	0.00018	5.31e-06	0.439164	ZMAT3	zinc finger matrin-type 3
A_32_P83556	0.0142	0.00218	0.43903	CFAP58-AS1	CFAP58 antisense RNA 1 (head to head)
A_24_P785853	0.0197	0.00342	0.438974	LOC105377371	uncharacterized LOC105377371
A_32_P47410	0.00366	0.000343	0.438818	TMEM232	transmembrane protein 232
A_32_P66297	0.0136	0.00207	0.438784
A_23_P362736	0.00256	0.000209	0.438522	RSPH10B	radial spoke head 10 homolog B
A_24_P458479	0.0024	0.000191	0.437846	FAM27E2	family with sequence similarity 27 member E2
A_24_P255100	0.00115	6.76e-05	0.437776	C9orf135	chromosome 9 open reading frame 135
A_24_P238499	0.0319	0.00653	0.437684	TYMSOS	TYMS opposite strand
A_23_P9614	0.185	0.0755	0.437671	NDUFA4L2	NDUFA4, mitochondrial complex associated like 2
A_24_P722360	0.00687	0.000821	0.437623
A_23_P105963	0.000891	4.75e-05	0.437617	AK7	adenylate kinase 7
A_23_P348979	0.00175	0.000121	0.437453	FAM27E3	family with sequence similarity 27 member E3
A_23_P99741	0.00296	0.000255	0.437444	CDKL1	cyclin dependent kinase like 1
A_32_P108889	0.0142	0.00217	0.437402	DCLK1	doublecortin like kinase 1
A_32_P137920	0.0024	0.000191	0.437215	RSPH4A	radial spoke head 4 homolog A
A_23_P500844	0.0113	0.0016	0.43695	PDE5A	phosphodiesterase 5A
A_24_P385739	0.000158	4.46e-06	0.436675	EIF5A2	eukaryotic translation initiation factor 5A2
A_23_P17316	0.192	0.0797	0.43662	NKAIN4	Na+/K+ transporting ATPase interacting 4
A_24_P85099	0.00162	0.00011	0.436587	HMGA2	high mobility group AT-hook 2
A_23_P109974	0.0231	0.00423	0.436468	RAB6B	RAB6B, member RAS oncogene family
A_23_P154855	0.00566	0.00063	0.436419	KCNE1	potassium voltage-gated channel subfamily E regulatory subunit 1
A_23_P113748	0.0164	0.00266	0.43594	ZNF385D	zinc finger protein 385D
A_23_P214222	0.00127	7.8e-05	0.435704	MARCKS	myristoylated alanine rich protein kinase C substrate
A_23_P139418	0.000202	6.21e-06	0.435553	GALNT18	polypeptide N-acetylgalactosaminyltransferase 18
A_23_P111361	0.000817	4.2e-05	0.43541	PPIL6	peptidylprolyl isomerase like 6
A_23_P216610	0.00137	8.64e-05	0.435387	SUSD1	sushi domain containing 1
A_23_P303455	0.00412	0.000403	0.435371	GPR161	G protein-coupled receptor 161
A_23_P36689	0.000911	4.92e-05	0.43532	LRRC23	leucine rich repeat containing 23
A_32_P337442	0.000822	4.25e-05	0.434806	C10orf67	chromosome 10 open reading frame 67
A_32_P9048	0.0115	0.00165	0.434692
A_23_P36562	0.000966	5.36e-05	0.434629	ITGA5	integrin subunit alpha 5
A_23_P433016	0.00018	5.28e-06	0.434435	FBLN1	fibulin 1
A_24_P234462	0.0261	0.005	0.434368	TMIE	transmembrane inner ear
A_23_P213562	0.01	0.00136	0.434319	F2R	coagulation factor II thrombin receptor
A_32_P125639	0.0203	0.00356	0.434263
A_32_P211558	0.000927	5.06e-05	0.434239
A_32_P21255	0.00178	0.000125	0.434192	SLC30A4	solute carrier family 30 member 4
A_23_P94461	0.000394	1.54e-05	0.434125	FSD1L	fibronectin type III and SPRY domain containing 1 like
A_24_P703830	0.00593	0.000675	0.433915	NANOS3	nanos C2HC-type zinc finger 3
A_24_P75680	0.00181	0.000127	0.433794
A_23_P86012	0.00034	1.26e-05	0.433723	LAMB3	laminin subunit beta 3
A_32_P123527	0.00426	0.000424	0.433609
A_23_P357207	0.000303	1.08e-05	0.433602	MRAP2	melanocortin 2 receptor accessory protein 2
A_23_P425880	0.00166	0.000114	0.433342	TRIO	trio Rho guanine nucleotide exchange factor
A_32_P132748	0.00766	0.000957	0.433063
A_23_P53467	0.00259	0.000213	0.433048	IKBIP	IKBKB interacting protein
A_23_P341567	0.00491	0.000518	0.432873	SLC9B2	solute carrier family 9 member B2
A_32_P60635	0.00145	9.42e-05	0.432726	C11orf97	chromosome 11 open reading frame 97
A_23_P69586	6.28e-05	1.34e-06	0.432719	FAT1	FAT atypical cadherin 1
A_23_P62642	0.0109	0.00153	0.432608	CFAP45	cilia and flagella associated protein 45
A_23_P113701	0.00554	0.000611	0.432399	PDGFA	platelet derived growth factor subunit A
A_23_P257250	0.00012	3e-06	0.432235	KIAA0922	KIAA0922
A_23_P333038	0.00593	0.000675	0.432182	CFAP43	cilia and flagella associated protein 43
A_24_P313993	0.00341	0.000311	0.432007	CAPS	calcyphosine
A_23_P17811	0.00556	0.000615	0.431855	SEC14L2	SEC14 like lipid binding 2
A_32_P141768	0.00174	0.00012	0.431552	AGPAT4	1-acylglycerol-3-phosphate O-acyltransferase 4
A_23_P62387	0.00337	0.000306	0.431317	NUDT11	nudix hydrolase 11
A_23_P300070	0.000905	4.87e-05	0.431217	IQCG	IQ motif containing G
A_32_P63897	0.0207	0.00365	0.431205
A_23_P40295	0.137	0.0487	0.43115	LAMP5	lysosomal associated membrane protein family member 5
A_32_P167471	0.000612	2.85e-05	0.431048	CLMN	calmin
A_23_P100386	0.022	0.00399	0.431006	IL34	interleukin 34
A_23_P119353	0.00352	0.000325	0.430935	RASIP1	Ras interacting protein 1
A_23_P60339	0.0862	0.0254	0.430897	C9orf64	chromosome 9 open reading frame 64
A_24_P358591	0.00136	8.54e-05	0.430821	C2orf70	chromosome 2 open reading frame 70
A_23_P33583	0.00316	0.000278	0.430787	DNAH7	dynein axonemal heavy chain 7
A_24_P153035	0.0167	0.00274	0.430731
A_23_P342709	0.00458	0.000468	0.430676	FBXO15	F-box protein 15
A_24_P923612	0.0445	0.0102	0.430659	PTHLH	parathyroid hormone like hormone
A_23_P113034	0.000272	9.41e-06	0.430545	C10orf11	chromosome 10 open reading frame 11
A_24_P334640	0.000253	8.48e-06	0.430478	PAQR8	progestin and adipoQ receptor family member 8
A_23_P468	0.00756	0.000939	0.43021	CCDC181	coiled-coil domain containing 181
A_24_P349264	0.0298	0.00594	0.430172	KRT80	keratin 80
A_23_P145485	0.000351	1.31e-05	0.430065	ULBP2	UL16 binding protein 2
A_24_P169402	0.0197	0.00342	0.429954
A_23_P20578	0.0201	0.00352	0.429845	FAM166B	family with sequence similarity 166 member B
A_32_P224253	0.0268	0.00516	0.429562	DNAH11	dynein axonemal heavy chain 11
A_23_P203558	0.00457	0.000466	0.42948	HBB	hemoglobin subunit beta
A_23_P122127	0.00819	0.00104	0.429443	FYB	FYN binding protein
A_23_P257562	0.00318	0.000281	0.429414	SORBS2	sorbin and SH3 domain containing 2
A_24_P887092	0.0256	0.00484	0.429394
A_23_P417261	0.00122	7.38e-05	0.429231	EFHB	EF-hand domain family member B
A_23_P421032	0.0295	0.00586	0.429042	SEC14L4	SEC14 like lipid binding 4
A_32_P157945	0.000132	3.5e-06	0.429018	DSP	desmoplakin
A_23_P79069	0.032	0.00654	0.42895	RASAL3	RAS protein activator like 3
A_32_P32254	0.0459	0.0107	0.428902	COL6A1	collagen type VI alpha 1 chain
A_23_P91221	0.000171	4.95e-06	0.428414	PKIG	protein kinase (cAMP-dependent, catalytic) inhibitor gamma
A_23_P6746	0.000232	7.55e-06	0.428308	IQSEC1	IQ motif and Sec7 domain 1
A_23_P30429	0.000668	3.21e-05	0.428283	NDST1	N-deacetylase and N-sulfotransferase 1
A_24_P376902	0.00282	0.000238	0.428266	ICA1L	islet cell autoantigen 1 like
A_32_P96036	0.0459	0.0107	0.428255	MEX3A	mex-3 RNA binding family member A
A_24_P20806	0.00122	7.33e-05	0.42819	PRR7	proline rich 7 (synaptic)
A_23_P168211	6.63e-06	8.67e-08	0.427887	VOPP1	vesicular, overexpressed in cancer, prosurvival protein 1
A_32_P166467	0.0103	0.00142	0.427433
A_23_P379071	0.000829	4.32e-05	0.427265	FBXL13	F-box and leucine rich repeat protein 13
A_24_P916965	0.157	0.0594	0.427071	ITGBL1	integrin subunit beta like 1
A_23_P354314	0.00576	0.000645	0.426985	GPR161	G protein-coupled receptor 161
A_23_P121795	2.95e-05	5.15e-07	0.426926	SORBS2	sorbin and SH3 domain containing 2
A_32_P197053	0.00197	0.000144	0.426901	SMKR1	small lysine rich protein 1
A_23_P127818	0.0036	0.000335	0.426546	USH1C	USH1 protein network component harmonin
A_23_P140738	0.00189	0.000136	0.4264	PIEZO1	piezo type mechanosensitive ion channel component 1
A_32_P220463	0.0293	0.00581	0.42635	FBLL1	fibrillarin-like 1
A_32_P35839	0.136	0.048	0.426167
A_23_P211428	0.00622	0.000719	0.426114	SMTN	smoothelin
A_23_P147397	0.000395	1.55e-05	0.426102	DYNC2H1	dynein cytoplasmic 2 heavy chain 1
A_24_P117620	0.0219	0.00395	0.425918	CAMK2N1	calcium/calmodulin dependent protein kinase II inhibitor 1
A_24_P333461	0.0141	0.00217	0.425887	DNAH5	dynein axonemal heavy chain 5
A_23_P122655	0.185	0.0752	0.425129	LCAL1	lung cancer associated lncRNA 1
A_24_P924484	0.0116	0.00167	0.424887
A_23_P85585	0.00229	0.000179	0.424859	TINAGL1	tubulointerstitial nephritis antigen like 1
A_24_P256722	0.0215	0.00385	0.424652	CNGA1	cyclic nucleotide gated channel alpha 1
A_24_P102504	0.00193	0.00014	0.424508	DZIP3	DAZ interacting zinc finger protein 3
A_32_P15035	1.73e-05	2.71e-07	0.424452	LOC285812	uncharacterized LOC285812
A_32_P15512	0.00207	0.000155	0.424372	C1orf194	chromosome 1 open reading frame 194
A_23_P53346	0.354	0.196	0.424221	NEMP1	nuclear envelope integral membrane protein 1
A_23_P58960	0.00305	0.000265	0.424178	AGPAT4	1-acylglycerol-3-phosphate O-acyltransferase 4
A_23_P2322	0.00679	0.000809	0.424159	TSPAN19	tetraspanin 19
A_23_P107351	0.00413	0.000404	0.424141	LOC728392	uncharacterized LOC728392
A_23_P45811	0.0019	0.000137	0.424088	DIO1	deiodinase, iodothyronine type I
A_24_P222397	0.0112	0.0016	0.423899	CCDC181	coiled-coil domain containing 181
A_32_P204169	0.004	0.000388	0.42375	TTLL7	tubulin tyrosine ligase like 7
A_24_P230649	0.00459	0.00047	0.423557	MAATS1	MYCBP associated and testis expressed 1
A_32_P96692	0.00278	0.000233	0.423544	POLH	DNA polymerase eta
A_32_P3955	0.00171	0.000118	0.423542	C7orf57	chromosome 7 open reading frame 57
A_23_P219161	0.173	0.068	0.42342	OLFM1	olfactomedin 1
A_23_P395001	0.0119	0.00173	0.423305	SLC2A12	solute carrier family 2 member 12
A_23_P257803	0.0357	0.00758	0.423251	DMGDH	dimethylglycine dehydrogenase
A_23_P413285	0.00207	0.000155	0.423224	CC2D2A	coiled-coil and C2 domain containing 2A
A_23_P337899	0.015	0.00235	0.423202	2021-03-10	membrane associated ring-CH-type finger 10
A_32_P174790	0.000945	5.19e-05	0.423013	LINC00857	long intergenic non-protein coding RNA 857
A_23_P403081	0.167	0.0652	0.42297	C5orf34	chromosome 5 open reading frame 34
A_23_P369899	0.00761	0.000948	0.422898	TMEM158	transmembrane protein 158 (gene/pseudogene)
A_32_P167239	0.000573	2.58e-05	0.422895	AFAP1L1	actin filament associated protein 1 like 1
A_24_P331779	0.00269	0.000223	0.422856	RSPH4A	radial spoke head 4 homolog A
A_32_P38745	0.009	0.00118	0.422783
A_23_P321846	0.0448	0.0103	0.422604	KCNS1	potassium voltage-gated channel modifier subfamily S member 1
A_24_P60930	0.00146	9.48e-05	0.422555	BMP1	bone morphogenetic protein 1
A_32_P208753	0.0253	0.00478	0.422526	LOC100505984	uncharacterized LOC100505984
A_23_P167941	0.109	0.0355	0.422346	TREM2	triggering receptor expressed on myeloid cells 2
A_24_P95070	0.0967	0.0299	0.422334
A_32_P166272	0.109	0.0351	0.422113	STX11	syntaxin 11
A_24_P532727	0.000931	5.09e-05	0.422063
A_24_P346517	0.0139	0.00212	0.422042	LRGUK	leucine rich repeats and guanylate kinase domain containing
A_23_P29124	0.0125	0.00185	0.421998	GP1BB	glycoprotein Ib platelet beta subunit
A_23_P206806	0.0248	0.00465	0.421964	ITGAL	integrin subunit alpha L
A_23_P413862	0.0131	0.00196	0.421804	DCDC5	doublecortin domain containing 5
A_24_P79617	0.0288	0.0057	0.421501	KIAA0040	KIAA0040
A_32_P48134	0.00195	0.000142	0.421496	TPTE2P3	transmembrane phosphoinositide 3-phosphatase and tensin homolog 2 pseudogene 3
A_23_P392429	0.00109	6.27e-05	0.421213	ZNF396	zinc finger protein 396
A_23_P78958	0.00168	0.000115	0.421202	CAPS	calcyphosine
A_24_P381975	0.00259	0.000212	0.421014	TMEM231	transmembrane protein 231
A_24_P137434	0.00201	0.000149	0.420972	DCBLD2	discoidin, CUB and LCCL domain containing 2
A_23_P18186	0.00936	0.00124	0.420968	GNB4	G protein subunit beta 4
A_23_P42451	0.00397	0.000383	0.420951	SYNE1	spectrin repeat containing nuclear envelope protein 1
A_24_P193257	0.01	0.00136	0.420763
A_23_P43630	0.000498	2.11e-05	0.42076
A_24_P77082	0.0479	0.0113	0.420689	KMO	kynurenine 3-monooxygenase (kynurenine 3-hydroxylase)
A_24_P669220	0.000203	6.23e-06	0.420613
A_23_P253911	0.202	0.0862	0.420331	CHRNA3	cholinergic receptor nicotinic alpha 3 subunit
A_23_P148768	0.00442	0.000446	0.420304	F5	coagulation factor V
A_24_P178618	0.00184	0.000131	0.420141	AHNAK2	AHNAK nucleoprotein 2
A_23_P127033	0.124	0.0425	0.420023	ECHDC3	enoyl-CoA hydratase domain containing 3
A_24_P75190	0.00466	0.000481	0.420016	HBD	hemoglobin subunit delta
A_23_P57497	0.000236	7.74e-06	0.419923	MYH9	myosin, heavy chain 9, non-muscle
A_23_P214908	0.00143	9.2e-05	0.419838	MTHFD1L	methylenetetrahydrofolate dehydrogenase (NADP+ dependent) 1-like
A_24_P401768	0.00285	0.000241	0.419794	AMOTL1	angiomotin like 1
A_23_P170667	0.00904	0.00119	0.419786	ASPHD1	aspartate beta-hydroxylase domain containing 1
A_23_P124837	0.00046	1.88e-05	0.419757	LRP1	LDL receptor related protein 1
A_24_P68249	0.00229	0.00018	0.4197	LOC101928907	uncharacterized LOC101928907
A_32_P41327	0.0984	0.0306	0.419372
A_23_P254654	0.0305	0.00613	0.419358	CLIC3	chloride intracellular channel 3
A_23_P71480	0.0222	0.00404	0.419294	DEFB1	defensin beta 1
A_23_P211816	4.53e-05	8.68e-07	0.419224	MAP4	microtubule associated protein 4
A_32_P174441	0.016	0.00257	0.419166
A_23_P93348	0.0491	0.0117	0.419111	LTB	lymphotoxin beta
A_23_P355394	0.0283	0.00557	0.419033	STK32A	serine/threonine kinase 32A
A_23_P395582	0.079	0.0225	0.419008	ZFP42	ZFP42 zinc finger protein
A_23_P348636	0.00514	0.000551	0.418966	FOXJ1	forkhead box J1
A_23_P54488	0.00831	0.00106	0.418918	ACSBG1	acyl-CoA synthetase bubblegum family member 1
A_24_P714618	0.00143	9.18e-05	0.418571	LOC107987020	uncharacterized LOC107987020
A_23_P255111	0.00527	0.00057	0.418508
A_23_P78248	0.00494	0.000522	0.418494	KRT23	keratin 23
A_23_P371076	0.0409	0.00914	0.418388	KLF12	Kruppel like factor 12
A_23_P79360	0.175	0.0695	0.418125	NOSTRIN	nitric oxide synthase trafficking
A_24_P243633	0.0119	0.00172	0.41803	DCBLD1	discoidin, CUB and LCCL domain containing 1
A_24_P188231	0.00142	9.12e-05	0.417979	PALMD	palmdelphin
A_24_P69784	0.000665	3.19e-05	0.417923	PACS1	phosphofurin acidic cluster sorting protein 1
A_24_P98948	0.0305	0.00614	0.417819
A_24_P348326	6.58e-05	1.43e-06	0.417569	IL27RA	interleukin 27 receptor subunit alpha
A_32_P200586	0.00549	0.000604	0.4175
A_23_P331928	0.00141	9.02e-05	0.417144	CD109	CD109 molecule
A_23_P342131	0.00105	5.97e-05	0.417136	CYB561A3	cytochrome b561 family member A3
A_32_P228268	0.00882	0.00115	0.417004	DNAH10	dynein axonemal heavy chain 10
A_32_P185839	0.0221	0.00401	0.41693
A_32_P190864	0.000341	1.27e-05	0.416918
A_23_P121885	0.00114	6.74e-05	0.416517	ROPN1L	rhophilin associated tail protein 1 like
A_23_P218111	0.0506	0.0122	0.416511	SERPINA1	serpin family A member 1
A_24_P201021	0.000288	1.01e-05	0.4165	PSCA	prostate stem cell antigen
A_23_P37497	0.00052	2.24e-05	0.416486	MYO1E	myosin IE
A_32_P220183	0.00221	0.00017	0.415995
A_24_P941359	0.0227	0.00414	0.415839	FAM65B	family with sequence similarity 65 member B
A_24_P123408	0.00459	0.00047	0.415671	ABLIM3	actin binding LIM protein family member 3
A_23_P376014	0.0147	0.00228	0.415597	DNAH6	dynein axonemal heavy chain 6
A_24_P315954	0.0102	0.0014	0.41546
A_23_P15678	0.00162	0.00011	0.415342	TEKT1	tektin 1
A_24_P36229	0.0296	0.00589	0.415254	DTNA	dystrobrevin alpha
A_32_P375286	0.101	0.0318	0.415084	ZNF660	zinc finger protein 660
A_24_P175460	0.000146	4.03e-06	0.415048	CAMSAP1	calmodulin regulated spectrin associated protein 1
A_23_P144165	0.00104	5.93e-05	0.414972	DZIP3	DAZ interacting zinc finger protein 3
A_23_P349504	0.00199	0.000146	0.414906	IQUB	IQ motif and ubiquitin domain containing
A_23_P113283	0.000373	1.42e-05	0.414893	ZMAT3	zinc finger matrin-type 3
A_23_P434919	0.00758	0.000943	0.414749	RAB42	RAB42, member RAS oncogene family
A_32_P155035	0.00436	0.000438	0.414496	LOC100506411	uncharacterized LOC100506411
A_23_P95231	0.00185	0.000132	0.41446	CASC1	cancer susceptibility candidate 1
A_24_P337104	0.0166	0.0027	0.414409	OXTR	oxytocin receptor
A_32_P179396	0.00965	0.00129	0.414096	SPEF2	sperm flagellar 2
A_23_P88522	0.00363	0.00034	0.41409	NMB	neuromedin B
A_32_P383681	0.00791	0.001	0.414089	DNAH6	dynein axonemal heavy chain 6
A_23_P103433	0.00158	0.000106	0.41388	OSCP1	organic solute carrier partner 1
A_23_P19182	0.00565	0.000628	0.413574	REEP2	receptor accessory protein 2
A_23_P214176	0.00018	5.29e-06	0.413549	CD109	CD109 molecule
A_24_P621701	0.242	0.111	0.413444
A_23_P153120	0.0209	0.00369	0.413365	DSG3	desmoglein 3
A_23_P27584	0.0156	0.00249	0.413203	MYADM	myeloid associated differentiation marker
A_32_P85578	4.04e-06	4.91e-08	0.413138
A_23_P104876	0.00176	0.000123	0.41299	SPA17	sperm autoantigenic protein 17
A_23_P13094	0.0669	0.0179	0.41284	MMP10	matrix metallopeptidase 10
A_24_P305541	0.0101	0.00138	0.412538	TRIB3	tribbles pseudokinase 3
A_23_P211814	1.73e-05	2.7e-07	0.412365	MAP4	microtubule associated protein 4
A_23_P218579	0.00328	0.000294	0.412291	GLB1L	galactosidase beta 1 like
A_23_P3866	0.00204	0.000152	0.412184	COTL1	coactosin like F-actin binding protein 1
A_23_P42811	0.00306	0.000266	0.412129	AGR3	anterior gradient 3, protein disulphide isomerase family member
A_23_P76450	0.0241	0.00446	0.411952	PHLDA1	pleckstrin homology like domain family A member 1
A_24_P17031	0.0597	0.0153	0.411938
A_23_P205997	0.000152	4.22e-06	0.411865	APH1B	aph-1 homolog B, gamma-secretase subunit
A_23_P112004	0.00275	0.00023	0.411859	LRRC6	leucine rich repeat containing 6
A_23_P49338	0.0333	0.00691	0.411762	TNFRSF12A	TNF receptor superfamily member 12A
A_24_P336276	0.00202	0.00015	0.411688	SLCO3A1	solute carrier organic anion transporter family member 3A1
A_23_P127978	0.193	0.0802	0.41154	B3GNT6	UDP-GlcNAc:betaGal beta-1,3-N-acetylglucosaminyltransferase 6
A_23_P7706	0.0113	0.00162	0.411502	GALNT10	polypeptide N-acetylgalactosaminyltransferase 10
A_32_P86763	0.153	0.0571	0.41123	TGM2	transglutaminase 2
A_23_P58117	0.00161	0.000109	0.41123	SHROOM3	shroom family member 3
A_32_P930685	0.00376	0.000358	0.411017	ZNF876P	zinc finger protein 876, pseudogene
A_23_P339095	0.0036	0.000336	0.410821	SPTBN1	spectrin beta, non-erythrocytic 1
A_24_P672143	0.0351	0.00739	0.41053
A_23_P149050	1.19e-09	4.72e-12	0.410313	LINC00115	long intergenic non-protein coding RNA 115
A_23_P210503	0.0318	0.0065	0.409916	EPPIN-WFDC6	EPPIN-WFDC6 readthrough
A_23_P428875	0.00246	0.000198	0.409632	TNFAIP8L1	TNF alpha induced protein 8 like 1
A_23_P91829	0.00199	0.000146	0.409483	DCBLD2	discoidin, CUB and LCCL domain containing 2
A_23_P143926	0.00102	5.73e-05	0.409427	ULK4	unc-51 like kinase 4
A_23_P218770	0.00121	7.25e-05	0.409349	RAC2	ras-related C3 botulinum toxin substrate 2 (rho family, small GTP binding protein Rac2)
A_32_P197060	0.00176	0.000122	0.409273	SMKR1	small lysine rich protein 1
A_23_P103672	0.00126	7.76e-05	0.409272	NES	nestin
A_23_P203475	0.00568	0.000632	0.409096	PRKCDBP	protein kinase C delta binding protein
A_23_P57709	0.0297	0.00591	0.409092	PCOLCE2	procollagen C-endopeptidase enhancer 2
A_23_P423427	0.00491	0.000518	0.408989	FAM171B	family with sequence similarity 171 member B
A_24_P192485	0.0157	0.00251	0.408974	TNFRSF11B	TNF receptor superfamily member 11b
A_32_P140079	0.199	0.0843	0.408966
A_24_P192933	0.00378	0.00036	0.408912	UBASH3B	ubiquitin associated and SH3 domain containing B
A_24_P341985	0.00511	0.000545	0.408669	BCO2	beta-carotene oxygenase 2
A_32_P215100	0.0128	0.00189	0.408653	FLJ26850	FLJ26850 protein
A_32_P83811	0.000668	3.2e-05	0.408632	FAM47E	family with sequence similarity 47 member E
A_23_P23457	0.00028	9.78e-06	0.408531	FBLIM1	filamin binding LIM protein 1
A_32_P117464	0.000138	3.72e-06	0.408408	MB21D2	Mab-21 domain containing 2
A_24_P923142	0.000227	7.36e-06	0.408315	ZC3HAV1L	zinc finger CCCH-type containing, antiviral 1 like
A_24_P726399	0.00255	0.000208	0.408257
A_23_P79482	0.00415	0.000407	0.408256	CHN1	chimerin 1
A_23_P377957	3.34e-06	3.98e-08	0.408064	KCTD12	potassium channel tetramerization domain containing 12
A_23_P37505	0.000754	3.79e-05	0.408039	DYX1C1	dyslexia susceptibility 1 candidate 1
A_23_P119500	0.0062	0.000717	0.407924	TNFAIP8L1	TNF alpha induced protein 8 like 1
A_24_P245778	0.0587	0.0149	0.407745	TFF3	trefoil factor 3
A_32_P212471	0.00229	0.000179	0.407738	RIIAD1	regulatory subunit of type II PKA R-subunit (RIIa) domain containing 1
A_23_P74609	0.0158	0.00253	0.407691	G0S2	G0/G1 switch 2
A_32_P3783	0.0193	0.00333	0.40756
A_32_P750514	0.00931	0.00123	0.40754	EFCAB6	EF-hand calcium binding domain 6
A_23_P257296	0.0147	0.0023	0.407331	TFF3	trefoil factor 3
A_23_P10743	0.00324	0.000287	0.407246	PDE6B	phosphodiesterase 6B
A_24_P120462	0.00754	0.000936	0.406661	DNAH5	dynein axonemal heavy chain 5
A_23_P208029	0.00783	0.000988	0.406494	DSC3	desmocollin 3
A_24_P670942	0.0157	0.0025	0.406453
A_23_P53390	0.00961	0.00129	0.406325	PTPRB	protein tyrosine phosphatase, receptor type B
A_24_P144439	0.0011	6.36e-05	0.406286	EFHB	EF-hand domain family member B
A_24_P335620	0.026	0.00498	0.405868	SLC7A5	solute carrier family 7 member 5
A_23_P77612	0.0226	0.00412	0.405764	KREMEN2	kringle containing transmembrane protein 2
A_24_P564462	0.000757	3.82e-05	0.405702	TIGAR	TP53 induced glycolysis regulatory phosphatase
A_23_P394377	0.0069	0.000825	0.40555	KCNRG	potassium channel regulator
A_23_P259189	0.00118	7.01e-05	0.405545	CLIC4	chloride intracellular channel 4
A_23_P76983	0.00186	0.000132	0.405454	BBOF1	basal body orientation factor 1
A_23_P161231	8.22e-05	1.86e-06	0.405272	SFXN3	sideroflexin 3
A_32_P219135	0.231	0.104	0.405185
A_24_P259083	0.000141	3.86e-06	0.40489	SIRPA	signal regulatory protein alpha
A_23_P349343	0.0172	0.00285	0.404531	ALS2CR12	amyotrophic lateral sclerosis 2 chromosome region candidate 12
A_24_P184385	0.0031	0.000271	0.4045	LRTOMT	leucine rich transmembrane and O-methyltransferase domain containing
A_23_P334870	0.0046	0.000472	0.404414	TMEM217	transmembrane protein 217
A_23_P254271	0.00501	0.000533	0.404407	TUBB6	tubulin beta 6 class V
A_24_P98109	0.065	0.0172	0.404397	SNX10	sorting nexin 10
A_23_P141680	0.00389	0.000375	0.403934	BCAS3	BCAS3, microtubule associated cell migration factor
A_32_P59837	0.0276	0.00537	0.403376
A_23_P136964	0.00292	0.000249	0.403234	RPGR	retinitis pigmentosa GTPase regulator
A_23_P214079	0.105	0.0337	0.403189	SPINK1	serine peptidase inhibitor, Kazal type 1
A_32_P123966	0.000714	3.51e-05	0.403167	RPGRIP1L	RPGRIP1 like
A_23_P327605	0.00791	0.001	0.402989	ADGRA1	adhesion G protein-coupled receptor A1
A_23_P48217	0.00219	0.000169	0.40297	APOLD1	apolipoprotein L domain containing 1
A_23_P109320	0.000157	4.43e-06	0.402731	RIPPLY3	ripply transcriptional repressor 3
A_32_P26464	0.0176	0.00293	0.402574	UMODL1-AS1	UMODL1 antisense RNA 1
A_24_P142141	0.000234	7.63e-06	0.402473	ABHD2	abhydrolase domain containing 2
A_24_P393864	4.28e-05	8.08e-07	0.4023	PHTF1	putative homeodomain transcription factor 1
A_32_P151937	0.0847	0.0248	0.402246
A_23_P73220	0.000288	1.01e-05	0.402002	FGD6	FYVE, RhoGEF and PH domain containing 6
A_23_P134980	0.0626	0.0163	0.401889	FGD3	FYVE, RhoGEF and PH domain containing 3
A_24_P115651	0.0163	0.00263	0.401524	ENKUR	enkurin, TRPC channel interacting protein
A_23_P375419	0.0509	0.0123	0.401373	TTC16	tetratricopeptide repeat domain 16
A_23_P132027	0.00517	0.000556	0.40136	SPAG4	sperm associated antigen 4
A_24_P140475	3.37e-05	6.05e-07	0.401245	SORBS2	sorbin and SH3 domain containing 2
A_32_P2303	0.001	5.61e-05	0.40116
A_24_P685241	0.000637	3.01e-05	0.400075
A_32_P19806	0.021	0.00373	0.400037	DNAH11	dynein axonemal heavy chain 11
A_32_P108420	3.94e-07	3.21e-09	0.400011
A_24_P225878	0.014	0.00215	0.399983	KIF9	kinesin family member 9
A_23_P31873	0.00525	0.000567	0.399834	RAB11FIP1	RAB11 family interacting protein 1
A_24_P84608	0.00601	0.000686	0.399743
A_23_P422732	0.00159	0.000107	0.399725	WDR63	WD repeat domain 63
A_32_P110472	5.1e-05	1.01e-06	0.399517	IYD	iodotyrosine deiodinase
A_23_P92120	0.0096	0.00129	0.399156	SNTN	sentan, cilia apical structure protein
A_24_P63347	0.0532	0.013	0.398935	PF4V1	platelet factor 4 variant 1
A_32_P19966	0.0166	0.0027	0.398765	KCNB1	potassium voltage-gated channel subfamily B member 1
A_23_P19754	0.0472	0.0111	0.398705	CPA4	carboxypeptidase A4
A_24_P924915	0.000613	2.86e-05	0.398675	ABHD2	abhydrolase domain containing 2
A_32_P50603	0.00711	0.000862	0.398213	C2orf70	chromosome 2 open reading frame 70
A_23_P93058	0.0164	0.00265	0.398099	DNAH5	dynein axonemal heavy chain 5
A_24_P159335	0.00317	0.00028	0.397867	SPATA33	spermatogenesis associated 33
A_23_P49155	0.000848	4.45e-05	0.397838	CDH3	cadherin 3
A_23_P132718	0.01	0.00137	0.397784	SEMA3B	semaphorin 3B
A_23_P33326	0.119	0.0399	0.397737	ADRA1B	adrenoceptor alpha 1B
A_24_P51061	0.00311	0.000272	0.397605	DCBLD2	discoidin, CUB and LCCL domain containing 2
A_23_P86653	0.208	0.0894	0.397493	SRGN	serglycin
A_23_P103070	2.55e-05	4.29e-07	0.397023	YWHAH	tyrosine 3-monooxygenase/tryptophan 5-monooxygenase activation protein eta
A_32_P85106	0.0179	0.003	0.396732	C6orf118	chromosome 6 open reading frame 118
A_32_P206899	0.0162	0.00262	0.39645	DNAH2	dynein axonemal heavy chain 2
A_23_P429581	0.000601	2.76e-05	0.396408	TMEM67	transmembrane protein 67
A_23_P75002	0.0117	0.00169	0.396351	MKX	mohawk homeobox
A_32_P79178	0.0418	0.00941	0.396246
A_24_P149314	0.00171	0.000118	0.396139	ULBP2	UL16 binding protein 2
A_23_P393099	0.0143	0.0022	0.39596	TFF3	trefoil factor 3
A_23_P75063	0.00441	0.000444	0.395925	DYDC2	DPY30 domain containing 2
A_23_P152678	0.00615	0.000708	0.395647	B9D1	B9 domain containing 1
A_24_P211797	0.0252	0.00476	0.395627
A_24_P718947	0.162	0.062	0.395522
A_23_P80162	0.00246	0.000198	0.395483	TMPRSS3	transmembrane protease, serine 3
A_23_P29663	0.00696	0.000838	0.395453	ZMYND10	zinc finger MYND-type containing 10
A_23_P218774	0.00524	0.000566	0.395353	RAC2	ras-related C3 botulinum toxin substrate 2 (rho family, small GTP binding protein Rac2)
A_24_P478556	0.0114	0.00163	0.395165	BOLA3-AS1	BOLA3 antisense RNA 1 (head to head)
A_32_P16625	0.144	0.0524	0.39504
A_23_P131754	0.000471	1.94e-05	0.395022	FNDC11	fibronectin type III domain containing 11
A_23_P131935	0.00189	0.000135	0.394865	FERMT1	fermitin family member 1
A_23_P47704	0.00414	0.000407	0.394738	UCP2	uncoupling protein 2
A_23_P22143	0.00304	0.000263	0.394738	PDE6B	phosphodiesterase 6B
A_24_P758323	0.0214	0.00384	0.394726
A_23_P33914	0.00109	6.31e-05	0.394519	NUP62CL	nucleoporin 62 C-terminal like
A_24_P12397	0.0683	0.0184	0.394264	TREM2	triggering receptor expressed on myeloid cells 2
A_24_P169343	0.000317	1.16e-05	0.394199	AAED1	AhpC/TSA antioxidant enzyme domain containing 1
A_23_P137984	0.00165	0.000112	0.394178	S100A10	S100 calcium binding protein A10
A_23_P106405	0.0357	0.00756	0.394095	NDN	necdin, MAGE family member
A_23_P143650	0.002	0.000147	0.394078	DUSP18	dual specificity phosphatase 18
A_23_P39703	0.0012	7.22e-05	0.394042	ABCB11	ATP binding cassette subfamily B member 11
A_24_P12690	0.197	0.083	0.393818	IDO2	indoleamine 2,3-dioxygenase 2
A_23_P61406	0.0271	0.00524	0.393498	SHC3	SHC adaptor protein 3
A_24_P626931	1.4e-05	2.1e-07	0.39312	UBE3D	ubiquitin protein ligase E3D
A_32_P107876	0.0014	8.9e-05	0.392844	FRAS1	Fraser extracellular matrix complex subunit 1
A_24_P27627	0.00417	0.000412	0.392717	CHRNB1	cholinergic receptor nicotinic beta 1 subunit
A_23_P37503	0.000489	2.05e-05	0.392119	MYO1E	myosin IE
A_23_P204847	0.22	0.0971	0.392004	LCP1	lymphocyte cytosolic protein 1
A_32_P154053	0.00569	0.000635	0.391941	ATG9B	autophagy related 9B
A_23_P98571	0.0253	0.00478	0.391907	PPP1R32	protein phosphatase 1 regulatory subunit 32
A_32_P48466	0.00671	0.000797	0.391642	LCA5L	LCA5L, lebercilin like
A_24_P410453	0.0145	0.00224	0.391374	SYNE1	spectrin repeat containing nuclear envelope protein 1
A_23_P90804	3.93e-05	7.32e-07	0.39101	MAP4K4	mitogen-activated protein kinase kinase kinase kinase 4
A_32_P40673	0.0715	0.0196	0.390947
A_24_P251962	0.0166	0.0027	0.390943	PCDHB2	protocadherin beta 2
A_23_P79251	0.000201	6.15e-06	0.390918	EHD3	EH domain containing 3
A_23_P67980	0.0349	0.00733	0.390827	KLF7	Kruppel like factor 7
A_23_P23155	0.0974	0.0302	0.390794	AJAP1	adherens junctions associated protein 1
A_24_P392110	0.00739	0.000907	0.390771	PSG8	pregnancy specific beta-1-glycoprotein 8
A_23_P204941	0.0646	0.017	0.390732	GJB2	gap junction protein beta 2
A_24_P896188	0.173	0.0681	0.390462
A_24_P247026	0.00985	0.00133	0.390421	SAXO2	stabilizer of axonemal microtubules 2
A_24_P416131	0.00554	0.000611	0.390341	COTL1	coactosin like F-actin binding protein 1
A_23_P3302	0.0015	9.88e-05	0.39027	MNS1	meiosis specific nuclear structural 1
A_23_P392897	0.000243	8.05e-06	0.390151
A_24_P190804	0.0517	0.0126	0.390092	AP1S2	adaptor related protein complex 1 sigma 2 subunit
A_23_P23705	0.000622	2.91e-05	0.389633	SPATA6	spermatogenesis associated 6
A_24_P784954	0.0453	0.0105	0.389355	RAP2C-AS1	RAP2C antisense RNA 1
A_23_P80508	0.138	0.0495	0.389326	PLSCR2	phospholipid scramblase 2
A_23_P63725	0.00766	0.000957	0.389187	CFAP43	cilia and flagella associated protein 43
A_24_P62530	0.000455	1.86e-05	0.388911	RHOU	ras homolog family member U
A_23_P170587	0.000612	2.85e-05	0.388779	SMYD2	SET and MYND domain containing 2
A_23_P213385	0.000817	4.2e-05	0.388769	BASP1	brain abundant membrane attached signal protein 1
A_32_P10886	0.0042	0.000415	0.388482	C6orf52	chromosome 6 open reading frame 52
A_24_P757255	0.0046	0.000472	0.388343	GPR157	G protein-coupled receptor 157
A_23_P432554	0.00269	0.000223	0.388236	FBXO36	F-box protein 36
A_23_P24870	9e-05	2.08e-06	0.387952	CD44	CD44 molecule (Indian blood group)
A_23_P5610	0.00587	0.000663	0.387784	DOK1	docking protein 1
A_23_P77079	0.0125	0.00185	0.387704	MYEF2	myelin expression factor 2
A_24_P64329	0.000175	5.11e-06	0.38765	STK32C	serine/threonine kinase 32C
A_23_P368805	0.00808	0.00103	0.387499	HHLA2	HERV-H LTR-associating 2
A_23_P135499	0.00125	7.59e-05	0.387469	CLIC4	chloride intracellular channel 4
A_23_P253661	0.00186	0.000133	0.387458	DNAJC22	DnaJ heat shock protein family (Hsp40) member C22
A_24_P272748	0.00284	0.00024	0.387308	RIIAD1	regulatory subunit of type II PKA R-subunit (RIIa) domain containing 1
A_23_P67169	0.112	0.0366	0.387243	IL11	interleukin 11
A_24_P313756	0.00106	6.04e-05	0.387174	TUBB6	tubulin beta 6 class V
A_24_P270971	0.0236	0.00435	0.387163	DRC3	dynein regulatory complex subunit 3
A_23_P348257	0.0441	0.0101	0.387043	NUAK1	NUAK family kinase 1
A_24_P58488	0.0104	0.00144	0.386964	C2orf73	chromosome 2 open reading frame 73
A_32_P181443	0.444	0.273	0.38677
A_23_P256473	0.00124	7.49e-05	0.386684	SEMA3C	semaphorin 3C
A_24_P111547	0.00157	0.000105	0.386662	MDH1B	malate dehydrogenase 1B
A_24_P882959	0.0112	0.00159	0.38665	LOC284344	uncharacterized LOC284344
A_23_P47247	0.000818	4.21e-05	0.386609	TCP11L1	t-complex 11 like 1
A_23_P87238	0.0338	0.00704	0.386515	SAA4	serum amyloid A4, constitutive
A_24_P364296	0.0118	0.0017	0.386497	STX2	syntaxin 2
A_32_P162250	0.000647	3.08e-05	0.386413	ARHGAP18	Rho GTPase activating protein 18
A_32_P56624	0.00699	0.000843	0.386402	FAM92B	family with sequence similarity 92 member B
A_32_P331139	0.00329	0.000295	0.386256	CFAP126	cilia and flagella associated protein 126
A_32_P180315	0.0184	0.00311	0.386083	CCDC180	coiled-coil domain containing 180
A_23_P139166	0.0138	0.0021	0.385947
A_24_P408736	0.00733	0.000897	0.385874	GALNT5	polypeptide N-acetylgalactosaminyltransferase 5
A_23_P99771	0.000945	5.19e-05	0.385789	PNMA1	paraneoplastic Ma antigen 1
A_23_P212307	0.00244	0.000195	0.385787	KIF9	kinesin family member 9
A_23_P211762	0.0435	0.00993	0.385651
A_24_P289208	0.0147	0.00229	0.385647	TFF3	trefoil factor 3
A_32_P177500	0.00291	0.000249	0.385444	IL5RA	interleukin 5 receptor subunit alpha
A_23_P384532	0.0273	0.00529	0.385329	CFAP53	cilia and flagella associated protein 53
A_24_P364057	0.00137	8.61e-05	0.38523	C11orf70	chromosome 11 open reading frame 70
A_23_P156010	0.0165	0.00269	0.385214	PCDHB12	protocadherin beta 12
A_24_P339560	0.279	0.137	0.38498	SIGLEC11	sialic acid binding Ig like lectin 11
A_32_P332317	0.0673	0.018	0.384898	BLACAT1	bladder cancer associated transcript 1 (non-protein coding)
A_24_P740549	0.0116	0.00168	0.384842	ARHGEF26-AS1	ARHGEF26 antisense RNA 1
A_23_P71379	0.000151	4.2e-06	0.384774	PSCA	prostate stem cell antigen
A_23_P20566	0.0147	0.00229	0.384772	TPM2	tropomyosin 2 (beta)
A_32_P144599	0.000209	6.47e-06	0.384651	MACC1	metastasis associated in colon cancer 1
A_23_P135494	0.000887	4.72e-05	0.38452	CLIC4	chloride intracellular channel 4
A_24_P857404	0.0768	0.0216	0.384353	MEX3A	mex-3 RNA binding family member A
A_24_P133162	0.00429	0.000427	0.383611	STPG1	sperm tail PG-rich repeat containing 1
A_24_P380284	0.00716	0.000871	0.383451	PCDHB9	protocadherin beta 9
A_23_P149111	2.78e-05	4.77e-07	0.383337	PTPN14	protein tyrosine phosphatase, non-receptor type 14
A_32_P181725	0.0207	0.00365	0.383047
A_32_P167511	0.00702	0.000848	0.382513
A_23_P168351	0.00137	8.64e-05	0.382442	HEY2	hes related family bHLH transcription factor with YRPW motif 2
A_23_P113453	0.00376	0.000358	0.382338
A_24_P410776	0.0476	0.0112	0.382321	DNAH7	dynein axonemal heavy chain 7
A_24_P75460	0.0126	0.00187	0.382211	VWC2L	von Willebrand factor C domain containing protein 2-like
A_24_P765795	0.000787	4e-05	0.382149
A_23_P382081	0.00207	0.000156	0.382106	SPEF2	sperm flagellar 2
A_23_P59960	0.00466	0.000481	0.382079	CRISPLD1	cysteine rich secretory protein LCCL domain containing 1
A_23_P418451	0.00196	0.000143	0.382015	PIH1D2	PIH1 domain containing 2
A_23_P152655	0.0664	0.0177	0.381784	ICAM2	intercellular adhesion molecule 2
A_32_P179258	0.0497	0.0119	0.381757	RAB22A	RAB22A, member RAS oncogene family
A_23_P168324	0.0315	0.0064	0.381671	KIAA0319	KIAA0319
A_32_P112623	0.0032	0.000283	0.381596	FAM27E3	family with sequence similarity 27 member E3
A_32_P42895	0.00011	2.68e-06	0.381542
A_32_P213615	0.0776	0.0219	0.381346
A_23_P44831	0.231	0.104	0.381074	ASAP1	ArfGAP with SH3 domain, ankyrin repeat and PH domain 1
A_23_P50232	0.105	0.0334	0.380988	AURKC	aurora kinase C
A_23_P347194	0.0362	0.0077	0.380862	LOC646903	uncharacterized LOC646903
A_23_P118791	0.000247	8.23e-06	0.380413	TMEM107	transmembrane protein 107
A_24_P366749	0.011	0.00154	0.380279	ATP8B2	ATPase phospholipid transporting 8B2
A_23_P166566	0.00332	0.000299	0.380236	EFCC1	EF-hand and coiled-coil domain containing 1
A_23_P106945	0.000461	1.89e-05	0.380202	ADCY7	adenylate cyclase 7
A_24_P936899	0.0119	0.00173	0.379947
A_24_P254702	0.00201	0.000148	0.379602	FBXO36	F-box protein 36
A_24_P627984	0.0446	0.0103	0.379532	EPM2AIP1	EPM2A interacting protein 1
A_23_P45955	0.0219	0.00396	0.37942	TEKT2	tektin 2
A_23_P31064	0.252	0.118	0.379394	MOXD1	monooxygenase DBH like 1
A_23_P160377	0.00456	0.000464	0.379358	DNALI1	dynein axonemal light intermediate chain 1
A_32_P69930	0.00701	0.000845	0.379301	CCDC96	coiled-coil domain containing 96
A_24_P357778	0.0108	0.0015	0.378985	ZBED9	zinc finger BED-type containing 9
A_23_P503059	0.0195	0.00337	0.378954	CNTN5	contactin 5
A_23_P98763	0.00536	0.000585	0.378557	LRTOMT	leucine rich transmembrane and O-methyltransferase domain containing
A_24_P38722	0.037	0.00797	0.378472	CFAP43	cilia and flagella associated protein 43
A_23_P356163	0.00483	0.000506	0.37833	WDR49	WD repeat domain 49
A_23_P338912	0.076	0.0213	0.378316	PHLDA1	pleckstrin homology like domain family A member 1
A_24_P160696	0.0101	0.00138	0.378237	MAATS1	MYCBP associated and testis expressed 1
A_23_P129174	0.00186	0.000133	0.378169	LRRC49	leucine rich repeat containing 49
A_32_P78528	0.000593	2.7e-05	0.378114	TUBB	tubulin beta class I
A_23_P88559	0.0171	0.00283	0.377873	LIPC	lipase C, hepatic type
A_23_P85008	0.00148	9.68e-05	0.377789	MAOB	monoamine oxidase B
A_32_P198071	0.000271	9.37e-06	0.377775
A_24_P943597	0.125	0.0426	0.377753	PHLDA1	pleckstrin homology like domain family A member 1
A_23_P371966	0.00857	0.0011	0.377753	FAM171B	family with sequence similarity 171 member B
A_24_P929650	0.00236	0.000186	0.377733
A_23_P27606	0.000128	3.3e-06	0.377541	IL27RA	interleukin 27 receptor subunit alpha
A_23_P312300	0.0194	0.00336	0.377358	SCGB2A1	secretoglobin family 2A member 1
A_24_P450596	0.00292	0.00025	0.377335	ZNF850	zinc finger protein 850
A_32_P46817	0.000856	4.51e-05	0.377274
A_24_P176714	0.01	0.00137	0.37725	B9D1	B9 domain containing 1
A_32_P122703	0.00347	0.000318	0.376759	PGM2L1	phosphoglucomutase 2 like 1
A_23_P354791	0.00248	0.0002	0.376757	NAV2	neuron navigator 2
A_24_P915692	0.0341	0.0071	0.37664	PHLDA1	pleckstrin homology like domain family A member 1
A_32_P233780	0.451	0.28	0.376531	LOC105372645	uncharacterized LOC105372645
A_24_P6370	0.0141	0.00217	0.376332	CCDC190	coiled-coil domain containing 190
A_23_P25913	0.00125	7.62e-05	0.376166	DNAL1	dynein axonemal light chain 1
A_24_P73862	0.16	0.0611	0.375987	C1QTNF1	C1q and tumor necrosis factor related protein 1
A_23_P300600	0.189	0.0777	0.375976	NEFH	neurofilament heavy polypeptide
A_32_P84237	0.0259	0.00493	0.375925	ERICH3	glutamate rich 3
A_24_P263384	0.0147	0.0023	0.375784	CEP89	centrosomal protein 89
A_23_P111531	0.00523	0.000563	0.375784	GLI3	GLI family zinc finger 3
A_32_P138396	0.0441	0.0101	0.375755	WDR86-AS1	WDR86 antisense RNA 1
A_32_P99100	0.000364	1.38e-05	0.375506	PTPRK	protein tyrosine phosphatase, receptor type K
A_32_P30339	0.004	0.000388	0.375288
A_23_P216501	0.00457	0.000466	0.375205	TPM2	tropomyosin 2 (beta)
A_23_P152949	0.0166	0.0027	0.375138	LRRC46	leucine rich repeat containing 46
A_24_P634867	0.0132	0.00199	0.374726	ERICH3	glutamate rich 3
A_23_P414312	0.0754	0.0211	0.374514	KNDC1	kinase non-catalytic C-lobe domain containing 1
A_23_P251324	0.000177	5.18e-06	0.374341	WDR31	WD repeat domain 31
A_23_P421054	0.0415	0.00933	0.373884	CFAP206	cilia and flagella associated protein 206
A_23_P117274	0.000184	5.44e-06	0.373776	MIPEP	mitochondrial intermediate peptidase
A_23_P377860	0.0369	0.00793	0.373507	UMODL1-AS1	UMODL1 antisense RNA 1
A_24_P307854	5.15e-05	1.03e-06	0.373427	FBXL18	F-box and leucine rich repeat protein 18
A_24_P166397	0.0311	0.00629	0.37306	KIAA0319	KIAA0319
A_24_P258633	0.00329	0.000295	0.372898	TUBB3	tubulin beta 3 class III
A_23_P307563	0.054	0.0133	0.372646	KALRN	kalirin, RhoGEF kinase
A_23_P303260	0.139	0.0497	0.372614	STX7	syntaxin 7
A_32_P216841	0.00102	5.74e-05	0.372557	SPATA18	spermatogenesis associated 18
A_24_P344416	0.0128	0.0019	0.372472	DSC3	desmocollin 3
A_23_P305198	0.149	0.055	0.372402	STAT4	signal transducer and activator of transcription 4
A_23_P33723	0.0666	0.0178	0.372396	CD163	CD163 molecule
A_23_P5742	0.13	0.0452	0.372355	CCDC121	coiled-coil domain containing 121
A_24_P354900	0.0167	0.00272	0.372344	DCBLD1	discoidin, CUB and LCCL domain containing 1
A_23_P108604	3.42e-05	6.16e-07	0.372238	MAP4K4	mitogen-activated protein kinase kinase kinase kinase 4
A_23_P139123	0.0752	0.021	0.372221	SERPING1	serpin family G member 1
A_23_P169966	0.0154	0.00245	0.372219	DNAI2	dynein axonemal intermediate chain 2
A_24_P20814	0.00104	5.89e-05	0.372134	KHDC1	KH homology domain containing 1
A_24_P168033	0.00431	0.00043	0.372098	FOXJ1	forkhead box J1
A_32_P170736	0.000523	2.26e-05	0.372092	CCDC71L	coiled-coil domain containing 71-like
A_32_P43320	0.172	0.0679	0.371837	PACERR	PTGS2 antisense NFKB1 complex-mediated expression regulator RNA
A_23_P23669	0.000904	4.85e-05	0.371717	PALMD	palmdelphin
A_23_P213375	0.119	0.0401	0.371433	PCDHB2	protocadherin beta 2
A_32_P171923	0.00118	7.02e-05	0.371416	MACC1	metastasis associated in colon cancer 1
A_23_P214839	0.024	0.00445	0.371313	MAK	male germ cell associated kinase
A_23_P258234	0.00947	0.00126	0.371061	DCBLD1	discoidin, CUB and LCCL domain containing 1
A_23_P170959	0.00136	8.57e-05	0.370627	LMLN	leishmanolysin like peptidase
A_23_P83200	0.0118	0.00171	0.370557	AK8	adenylate kinase 8
A_24_P134229	0.00633	0.000736	0.370543	TNFAIP8L1	TNF alpha induced protein 8 like 1
A_23_P70359	0.0849	0.0249	0.370515	AGPAT4-IT1	AGPAT4 intronic transcript 1
A_32_P61298	0.0238	0.0044	0.370006
A_23_P388489	0.00145	9.4e-05	0.369926	RPGRIP1L	RPGRIP1 like
A_23_P204016	0.000434	1.75e-05	0.36983	CACNB3	calcium voltage-gated channel auxiliary subunit beta 3
A_23_P50907	0.00337	0.000306	0.369793	ITGAV	integrin subunit alpha V
A_23_P213102	0.00764	0.000954	0.369722	PALLD	palladin, cytoskeletal associated protein
A_24_P415090	0.00292	0.000249	0.369687	EFCAB1	EF-hand calcium binding domain 1
A_24_P890536	0.0873	0.026	0.369575	LINC01410	long intergenic non-protein coding RNA 1410
A_23_P28582	0.000136	3.63e-06	0.369349
A_24_P273599	0.000318	1.17e-05	0.369275	ITGB8	integrin subunit beta 8
A_32_P204239	0.0627	0.0164	0.369258	CDHR3	cadherin related family member 3
A_23_P215883	0.000373	1.42e-05	0.369245	NCALD	neurocalcin delta
A_23_P121480	0.0151	0.00237	0.369201	CD200	CD200 molecule
A_24_P830361	0.135	0.0476	0.369124
A_32_P125803	0.000535	2.35e-05	0.369112	RBM26-AS1	RBM26 antisense RNA 1
A_23_P213171	0.0127	0.00189	0.368846	MTTP	microsomal triglyceride transfer protein
A_24_P923251	0.0478	0.0113	0.368531	TGM2	transglutaminase 2
A_23_P44665	0.0757	0.0212	0.368295	ADAM32	ADAM metallopeptidase domain 32
A_32_P97315	0.00885	0.00115	0.368235
A_24_P48587	0.00168	0.000115	0.368226	PSENEN	presenilin enhancer gamma-secretase subunit
A_23_P22398	0.00253	0.000205	0.367924	MACROD2	MACRO domain containing 2
A_23_P62021	0.101	0.0316	0.367827	THBS2	thrombospondin 2
A_24_P618928	0.00786	0.000993	0.367683	LOC100506844	uncharacterized LOC100506844
A_24_P179354	0.00471	0.000488	0.367508	PPIG	peptidylprolyl isomerase G
A_32_P2883	0.0157	0.00252	0.367344
A_23_P351270	0.259	0.124	0.367163	PAPPA	pappalysin 1
A_23_P430902	0.0027	0.000225	0.367162	MORN4	MORN repeat containing 4
A_23_P19020	0.0186	0.00315	0.366965	SNCAIP	synuclein alpha interacting protein
A_23_P134854	0.0066	0.000777	0.366876	CLDN23	claudin 23
A_23_P336612	0.00943	0.00126	0.366605	CFAP161	cilia and flagella associated protein 161
A_23_P14035	0.0311	0.0063	0.366425	AKAP3	A-kinase anchoring protein 3
A_24_P935243	0.0244	0.00455	0.366188	C8orf34	chromosome 8 open reading frame 34
A_23_P116187	0.0133	0.002	0.365863	BCO2	beta-carotene oxygenase 2
A_32_P193770	0.0118	0.00172	0.365856	C4orf47	chromosome 4 open reading frame 47
A_24_P405960	0.00579	0.000649	0.365816	PCDHB12	protocadherin beta 12
A_32_P165753	0.0729	0.0201	0.365626
A_23_P162378	0.00249	0.000201	0.365533	CEP83	centrosomal protein 83
A_23_P31584	0.00162	0.00011	0.365372	IFT22	intraflagellar transport 22
A_23_P138480	0.0152	0.00238	0.365281	C10orf95	chromosome 10 open reading frame 95
A_24_P32085	0.000212	6.64e-06	0.364898	MOB3B	MOB kinase activator 3B
A_23_P161352	0.0087	0.00113	0.364758	HACD1	3-hydroxyacyl-CoA dehydratase 1
A_23_P85015	0.00218	0.000166	0.364755	MAOB	monoamine oxidase B
A_23_P17420	0.00161	0.000109	0.3647	BCAS1	breast carcinoma amplified sequence 1
A_23_P413157	0.0351	0.0074	0.364641	CXorf58	chromosome X open reading frame 58
A_23_P112135	0.00416	0.000408	0.364598	TRAM1	translocation associated membrane protein 1
A_23_P14343	0.00923	0.00122	0.364547	AKAP6	A-kinase anchoring protein 6
A_23_P75523	0.000677	3.26e-05	0.364522	CD59	CD59 molecule
A_24_P97849	0.000266	9.18e-06	0.364398	DBN1	drebrin 1
A_23_P146468	0.0643	0.0169	0.364304	VAV2	vav guanine nucleotide exchange factor 2
A_24_P284353	0.000897	4.79e-05	0.364068	TMEM107	transmembrane protein 107
A_23_P381017	0.0069	0.000827	0.36385	WBSCR27	Williams Beuren syndrome chromosome region 27
A_32_P84049	0.102	0.0321	0.363849
A_32_P30717	0.000134	3.57e-06	0.363832
A_23_P36831	0.0155	0.00245	0.363701	GPRC5A	G protein-coupled receptor class C group 5 member A
A_23_P90780	0.00466	0.000481	0.363459
A_23_P164415	0.0226	0.00412	0.36313	CCDC40	coiled-coil domain containing 40
A_24_P322771	0.0819	0.0236	0.363119	TFF1	trefoil factor 1
A_24_P375691	0.00227	0.000176	0.363108	LOC100134317///LOC284412	uncharacterized LOC100134317///uncharacterized LOC284412
A_23_P19663	0.153	0.0572	0.363039	CTGF	connective tissue growth factor
A_32_P226186	0.000931	5.1e-05	0.362987	KIAA1549	KIAA1549
A_23_P200866	0.00733	0.000897	0.3627	STMN1	stathmin 1
A_23_P201179	0.00314	0.000276	0.362681	PHTF1	putative homeodomain transcription factor 1
A_23_P300076	0.00225	0.000174	0.362679	IQCG	IQ motif containing G
A_23_P100240	0.237	0.108	0.362653	CDH16	cadherin 16
A_23_P422981	0.000813	4.17e-05	0.362587	FBXO36	F-box protein 36
A_23_P404108	0.211	0.0912	0.362486	CCSER2	coiled-coil serine rich protein 2
A_23_P200222	0.000273	9.49e-06	0.362386	LRP8	LDL receptor related protein 8
A_23_P215009	0.0728	0.0201	0.362269	FAM65B	family with sequence similarity 65 member B
A_23_P216779	0.16	0.0607	0.362239	NTRK2	neurotrophic receptor tyrosine kinase 2
A_23_P52323	0.00598	0.000682	0.362078	COL17A1	collagen type XVII alpha 1 chain
A_24_P329795	0.147	0.0541	0.362064	C10orf10	chromosome 10 open reading frame 10
A_24_P85258	0.0336	0.00697	0.362055
A_23_P254079	0.000507	2.16e-05	0.361552	STBD1	starch binding domain 1
A_23_P391198	0.00156	0.000104	0.361454	RAB11FIP1	RAB11 family interacting protein 1
A_23_P362228	2.73e-06	3.08e-08	0.361296	ZNF436-AS1	ZNF436 antisense RNA 1
A_24_P184388	0.00754	0.000936	0.360993	LRTOMT	leucine rich transmembrane and O-methyltransferase domain containing
A_23_P28595	0.381	0.218	0.360728	DLX2	distal-less homeobox 2
A_24_P56073	0.0029	0.000247	0.360611	PLEKHB1	pleckstrin homology domain containing B1
A_32_P934840	0.0105	0.00145	0.360542	C8orf34	chromosome 8 open reading frame 34
A_32_P173439	1.24e-05	1.82e-07	0.360517
A_32_P104417	0.373	0.211	0.360343
A_23_P16817	0.00177	0.000124	0.360281	CLK1	CDC like kinase 1
A_23_P58671	0.0929	0.0283	0.36021	TPPP	tubulin polymerization promoting protein
A_23_P140591	0.00178	0.000124	0.360173	ABHD2	abhydrolase domain containing 2
A_24_P85537	0.0877	0.0261	0.359784	MAP3K13	mitogen-activated protein kinase kinase kinase 13
A_32_P146890	0.402	0.236	0.359737
A_24_P393740	0.0569	0.0143	0.359631	FYB	FYN binding protein
A_23_P12241	0.00498	0.000529	0.359473	MCOLN3	mucolipin 3
A_23_P255896	0.037	0.00795	0.359349	TRABD2A	TraB domain containing 2A
A_23_P348253	0.019	0.00326	0.359316	CDHR3	cadherin related family member 3
A_24_P759477	0.000852	4.48e-05	0.359246	ITGB8	integrin subunit beta 8
A_32_P112223	0.0513	0.0124	0.359161
A_24_P590317	0.0314	0.00638	0.359063
A_32_P127200	0.0342	0.00713	0.359062
A_23_P122662	0.000222	7.11e-06	0.358956	GFOD1	glucose-fructose oxidoreductase domain containing 1
A_32_P163739	0.0259	0.00492	0.358839	KIAA1257	KIAA1257
A_32_P86245	0.033	0.00682	0.358647	EFHC1	EF-hand domain containing 1
A_23_P116207	0.000568	2.54e-05	0.35856	IFT46	intraflagellar transport 46
A_23_P338981	0.0144	0.00223	0.358523	CYGB	cytoglobin
A_23_P128574	0.0922	0.028	0.358428	ENOX1	ecto-NOX disulfide-thiol exchanger 1
A_23_P14821	0.00591	0.000669	0.35842	GABRB3	gamma-aminobutyric acid type A receptor beta3 subunit
A_32_P183301	0.00155	0.000104	0.358356
A_24_P255524	0.34	0.183	0.358319	CALD1	caldesmon 1
A_23_P19590	0.0406	0.00903	0.358308	EZR	ezrin
A_23_P56050	0.00513	0.000548	0.358304	TNNT1	troponin T1, slow skeletal type
A_23_P206310	4.74e-05	9.23e-07	0.358261	KIAA0513	KIAA0513
A_24_P94222	0.000162	4.61e-06	0.358224	FBLIM1	filamin binding LIM protein 1
A_32_P102750	0.0376	0.00815	0.358194	LINC00689	long intergenic non-protein coding RNA 689
A_24_P341546	0.0191	0.00329	0.357846
A_23_P395172	0.00203	0.000151	0.357715	ABHD2	abhydrolase domain containing 2
A_23_P80594	0.0741	0.0206	0.357539	PLCL2	phospholipase C like 2
A_23_P35597	0.0868	0.0257	0.357491	C10orf10	chromosome 10 open reading frame 10
A_24_P467073	0.0671	0.018	0.357393	SMIM6	small integral membrane protein 6
A_23_P25194	0.00251	0.000203	0.357294	HRK	harakiri, BCL2 interacting protein
A_23_P409462	0.00702	0.000848	0.357106	DCBLD1	discoidin, CUB and LCCL domain containing 1
A_23_P160720	0.0245	0.00456	0.35707	BATF3	basic leucine zipper ATF-like transcription factor 3
A_23_P18751	0.0607	0.0156	0.357069	TMPRSS11E	transmembrane protease, serine 11E
A_23_P156970	0.00115	6.84e-05	0.357057	MEST	mesoderm specific transcript
A_23_P428326	8.98e-05	2.07e-06	0.357007	TBC1D16	TBC1 domain family member 16
A_24_P389409	0.0026	0.000213	0.356953	BMP1	bone morphogenetic protein 1
A_24_P123052	0.0114	0.00162	0.356912	RAP2B	RAP2B, member of RAS oncogene family
A_23_P40174	0.204	0.0871	0.356852	MMP9	matrix metallopeptidase 9
A_23_P76823	0.00316	0.000278	0.356768	ADSSL1	adenylosuccinate synthase like 1
A_23_P49597	1.84e-05	2.91e-07	0.356704	PLSCR3	phospholipid scramblase 3
A_24_P62367	0.0442	0.0101	0.356631	DLGAP1	DLG associated protein 1
A_23_P2793	0.132	0.0462	0.356413	ALOX5AP	arachidonate 5-lipoxygenase activating protein
A_24_P149445	0.00711	0.000864	0.356362	WEE2-AS1	WEE2 antisense RNA 1
A_23_P500741	0.019	0.00325	0.356272	CBFA2T3	CBFA2/RUNX1 translocation partner 3
A_24_P79054	0.0153	0.00241	0.356039	TGFB1	transforming growth factor beta 1
A_24_P265346	0.00653	0.000768	0.355946	KRT14	keratin 14
A_24_P109554	0.00482	0.000505	0.355738	CNTRL	centriolin
A_32_P131031	0.000498	2.11e-05	0.355708	MACC1	metastasis associated in colon cancer 1
A_23_P123060	0.000276	9.61e-06	0.355435	ITGB8	integrin subunit beta 8
A_24_P224469	0.143	0.0522	0.355379	TRPV3	transient receptor potential cation channel subfamily V member 3
A_24_P71468	0.0179	0.003	0.355323	QPCT	glutaminyl-peptide cyclotransferase
A_23_P31323	0.00181	0.000128	0.355149	ACTB	actin beta
A_23_P30634	0.0286	0.00565	0.355057	BACH2	BTB domain and CNC homolog 2
A_32_P420520	0.17	0.0666	0.354958	THAP7-AS1	THAP7 antisense RNA 1
A_23_P416289	0.000701	3.41e-05	0.354912	DIXDC1	DIX domain containing 1
A_23_P156284	0.000632	2.97e-05	0.354906	DBN1	drebrin 1
A_23_P303671	0.00534	0.000581	0.354897	ECM2	extracellular matrix protein 2
A_23_P157128	2.33e-06	2.51e-08	0.354767	SKAP2	src kinase associated phosphoprotein 2
A_23_P377499	0.00674	0.000801	0.354572	LOC100147773	uncharacterized LOC100147773
A_23_P108427	0.0132	0.00198	0.354487
A_23_P202837	0.00341	0.00031	0.354453	CCND1	cyclin D1
A_24_P42330	1.41e-05	2.13e-07	0.354431	LINC00665	long intergenic non-protein coding RNA 665
A_23_P22134	0.000202	6.2e-06	0.353974	BNC1	basonuclin 1
A_24_P772450	0.00684	0.000817	0.353768	LOC100507557	uncharacterized LOC100507557
A_24_P7121	0.00293	0.000251	0.353591	NSUN7	NOP2/Sun RNA methyltransferase family member 7
A_24_P156113	0.000789	4.02e-05	0.353553	EHD2	EH domain containing 2
A_24_P152527	0.00126	7.67e-05	0.353289	VAT1	vesicle amine transport 1
A_23_P18078	0.0592	0.0151	0.353093	RARRES1	retinoic acid receptor responder 1
A_32_P231547	0.0368	0.00788	0.353075
A_23_P210708	0.000602	2.77e-05	0.353022	SIRPA	signal regulatory protein alpha
A_32_P158272	0.0016	0.000108	0.352928	MACC1	metastasis associated in colon cancer 1
A_24_P13715	0.0876	0.0261	0.352855	FBXO22	F-box protein 22
A_32_P95265	0.00122	7.4e-05	0.352844
A_24_P56310	0.00763	0.000952	0.352804	TNFRSF19	TNF receptor superfamily member 19
A_32_P3742	0.00404	0.000393	0.352697	RFX3	regulatory factor X3
A_24_P83118	0.00152	0.0001	0.352605	DUSP18	dual specificity phosphatase 18
A_23_P129367	0.0478	0.0113	0.352284	DRC7	dynein regulatory complex subunit 7
A_32_P85360	0.0451	0.0104	0.351891
A_23_P9523	0.00223	0.000172	0.351624	RBKS	ribokinase
A_23_P500861	0.0293	0.00583	0.351438	SYNE1	spectrin repeat containing nuclear envelope protein 1
A_23_P108170	0.012	0.00175	0.351407	PSG6	pregnancy specific beta-1-glycoprotein 6
A_23_P359497	0.0101	0.00138	0.351385	TMEM231	transmembrane protein 231
A_23_P47579	0.0505	0.0122	0.351328	NLRP14	NLR family pyrin domain containing 14
A_24_P34186	0.0113	0.00161	0.351251	DMD	dystrophin
A_32_P130522	0.0138	0.0021	0.351222
A_23_P16754	0.175	0.0691	0.351214	KLHL30	kelch like family member 30
A_24_P930985	0.00276	0.000231	0.351117	RXRA	retinoid X receptor alpha
A_32_P104334	0.0235	0.00433	0.351021
A_24_P669216	0.000359	1.36e-05	0.350718
A_32_P427222	0.34	0.184	0.350645	MROH2A	maestro heat like repeat family member 2A
A_23_P51105	0.000284	9.94e-06	0.350622	CRIM1	cysteine rich transmembrane BMP regulator 1
A_23_P133236	0.00249	0.000201	0.350583	PCDHB14	protocadherin beta 14
A_24_P156769	0.0469	0.011	0.350492	MPL	MPL proto-oncogene, thrombopoietin receptor
A_23_P255876	0.0254	0.00479	0.350124	DNAI1	dynein axonemal intermediate chain 1
A_23_P142878	0.211	0.0913	0.350076	ATOH8	atonal bHLH transcription factor 8
A_23_P70318	0.00369	0.000348	0.34988	ENPP4	ectonucleotide pyrophosphatase/phosphodiesterase 4 (putative)
A_23_P46063	0.0015	9.88e-05	0.349816	NME7	NME/NM23 family member 7
A_23_P419213	0.002	0.000147	0.349587	CCDC191	coiled-coil domain containing 191
A_23_P62634	0.0124	0.00182	0.349503	RHCE	Rh blood group CcEe antigens
A_24_P418816	0.0521	0.0127	0.34939	GPX7	glutathione peroxidase 7
A_32_P17163	0.00271	0.000225	0.349349	ARHGAP18	Rho GTPase activating protein 18
A_24_P686247	1.22e-06	1.2e-08	0.349273	OCLN	occludin
A_23_P41599	0.00257	0.00021	0.34926	PCDHB8	protocadherin beta 8
A_32_P67036	4.08e-07	3.41e-09	0.349236
A_23_P16694	0.212	0.0919	0.348942	CPS1-IT1	CPS1 intronic transcript 1
A_24_P354337	0.000476	1.97e-05	0.348905	ARL6	ADP ribosylation factor like GTPase 6
A_32_P56463	0.0455	0.0106	0.348854
A_24_P135322	0.009	0.00118	0.348832	NRP1	neuropilin 1
A_32_P134772	0.0169	0.00277	0.348698	LOC100130691	uncharacterized LOC100130691
A_24_P59713	0.0014	8.95e-05	0.34869	HCP5B	HLA complex P5B (non-protein coding)
A_24_P693986	0.00194	0.000141	0.348608	TRNP1	TMF1-regulated nuclear protein 1
A_24_P67918	0.000335	1.24e-05	0.348549	ZNF396	zinc finger protein 396
A_32_P41254	0.013	0.00195	0.348529	MRAP2	melanocortin 2 receptor accessory protein 2
A_23_P205986	0.000606	2.79e-05	0.348386	IGF1R	insulin like growth factor 1 receptor
A_23_P138881	0.0828	0.024	0.348384	ACTN3	actinin alpha 3 (gene/pseudogene)
A_23_P21376	0.0118	0.00171	0.348376	MAGI2	membrane associated guanylate kinase, WW and PDZ domain containing 2
A_24_P773012	0.00437	0.00044	0.348093
A_23_P156402	0.0124	0.00183	0.348073	NME5	NME/NM23 family member 5
A_24_P937159	0.0164	0.00266	0.348005	KLF8	Kruppel like factor 8
A_23_P213620	0.018	0.00302	0.347996	PPP2R2B	protein phosphatase 2 regulatory subunit Bbeta
A_32_P188093	0.00509	0.000542	0.347933
A_32_P153954	0.0177	0.00296	0.347824	DEUP1	deuterosome assembly protein 1
A_24_P109071	0.00462	0.000475	0.347758	KIF27	kinesin family member 27
A_32_P468743	0.185	0.0752	0.347467	ODF3L1	outer dense fiber of sperm tails 3 like 1
A_23_P356154	0.0072	0.000877	0.34745	WDR49	WD repeat domain 49
A_24_P235520	0.0107	0.00149	0.347449	FAM27E3	family with sequence similarity 27 member E3
A_23_P46928	0.000818	4.21e-05	0.347426	PFKP	phosphofructokinase, platelet
A_23_P134100	0.0243	0.00453	0.347304	ULBP3	UL16 binding protein 3
A_24_P92752	0.00437	0.00044	0.34725	C1orf194	chromosome 1 open reading frame 194
A_23_P360990	0.0416	0.00937	0.347158	DYDC1	DPY30 domain containing 1
A_23_P348857	0.038	0.00826	0.347151	CEP170	centrosomal protein 170
A_24_P246406	8.22e-05	1.86e-06	0.346996	FAM69A	family with sequence similarity 69 member A
A_24_P71244	0.000229	7.45e-06	0.346954	PIK3CD	phosphatidylinositol-4,5-bisphosphate 3-kinase catalytic subunit delta
A_23_P35349	0.000125	3.22e-06	0.346792	SVIL	supervillin
A_23_P30464	0.00454	0.000461	0.346573	PRR7	proline rich 7 (synaptic)
A_24_P563745	0.102	0.0322	0.346552
A_23_P156632	0.243	0.112	0.346468	PGBD1	piggyBac transposable element derived 1
A_23_P390726	0.00601	0.000687	0.346207	TTC23L	tetratricopeptide repeat domain 23 like
A_23_P10081	0.000881	4.67e-05	0.346008	ARL13B	ADP ribosylation factor like GTPase 13B
A_24_P120934	0.000255	8.6e-06	0.34572	GADD45G	growth arrest and DNA damage inducible gamma
A_23_P66347	0.000358	1.35e-05	0.345562
A_24_P380022	0.0109	0.00153	0.345288	EIF5A2	eukaryotic translation initiation factor 5A2
A_23_P154740	0.00127	7.8e-05	0.345266	KIZ	kizuna centrosomal protein
A_32_P82293	0.00935	0.00124	0.345245
A_24_P57047	0.0483	0.0115	0.345172	DLL3	delta like canonical Notch ligand 3
A_23_P97700	0.105	0.0337	0.34516	TXNIP	thioredoxin interacting protein
A_23_P78608	0.000538	2.37e-05	0.345076	DENND1C	DENN domain containing 1C
A_23_P214821	0.453	0.283	0.345029	EDN1	endothelin 1
A_32_P79763	0.429	0.26	0.345006	TDRD12	tudor domain containing 12
A_23_P68072	0.00705	0.000852	0.34496	WDR54	WD repeat domain 54
[truncated: 30,389 more rows]

## Sheet: GSE47962_mock_BatSRB_DEGs
ID	adj.P.Val	P.Value	logFC	Gene.symbol	Gene.title
A_24_P119745	0.0011	6.39e-05	3.16323	FN1	fibronectin 1
A_24_P85539	0.00184	0.00013	2.94403	FN1	fibronectin 1
A_24_P334130	0.00241	0.000192	2.45457	FN1	fibronectin 1
A_23_P56746	0.00371	0.000351	2.06612	FAP	fibroblast activation protein alpha
A_32_P51237	0.00331	0.000297	1.9901	KANK4	KN motif and ankyrin repeat domains 4
A_24_P264943	0.00159	0.000107	1.97679	COMP	cartilage oligomeric matrix protein
A_24_P299318	0.000155	4.33e-06	1.97448	FAM101B	family with sequence similarity 101 member B
A_24_P277934	0.00106	6.04e-05	1.97397	COL1A2	collagen type I alpha 2 chain
A_23_P90436	0.00174	0.00012	1.95675	COMP	cartilage oligomeric matrix protein
A_23_P161218	0.0016	0.000108	1.93835	ANKRD1	ankyrin repeat domain 1
A_23_P87013	0.00114	6.72e-05	1.916	TAGLN	transgelin
A_23_P7642	0.00156	0.000104	1.88233	SPARC	secreted protein acidic and cysteine rich
A_23_P374082	0.001	5.65e-05	1.86556	ADAM19	ADAM metallopeptidase domain 19
A_24_P181254	0.0288	0.00568	1.85718	OLFM4	olfactomedin 4
A_24_P788772	0.000535	2.34e-05	1.79981
A_24_P354689	0.000632	2.97e-05	1.77479	SPOCK1	sparc/osteonectin, cwcv and kazal-like domains proteoglycan (testican) 1
A_23_P87011	0.00147	9.63e-05	1.74315	TAGLN	transgelin
A_23_P92730	0.0054	0.000591	1.69876	HSPB3	heat shock protein family B (small) member 3
A_23_P205031	0.00132	8.23e-05	1.65571	COL4A2	collagen type IV alpha 2 chain
A_23_P39955	0.00383	0.000367	1.63833	ACTG2	actin, gamma 2, smooth muscle, enteric
A_23_P302787	0.000164	4.71e-06	1.63356	LINC01116	long intergenic non-protein coding RNA 1116
A_24_P318656	0.000711	3.48e-05	1.6241	ITGB3	integrin subunit beta 3
A_32_P24376	0.00901	0.00118	1.57724	KRTAP2-3	keratin associated protein 2-3
A_32_P148146	0.00269	0.000223	1.57523
A_23_P210425	0.000192	5.79e-06	1.57143	MYL9	myosin light chain 9
A_23_P125233	0.0201	0.00352	1.52966	CNN1	calponin 1
A_23_P161194	0.000279	9.7e-06	1.51658	VIM	vimentin
A_23_P38519	0.000695	3.37e-05	1.50998	ITGB3	integrin subunit beta 3
A_23_P40415	0.00449	0.000454	1.50841	ADAMTS5	ADAM metallopeptidase with thrombospondin type 1 motif 5
A_24_P315256	0.000213	6.72e-06	1.50817
A_23_P68759	0.00424	0.000422	1.5048	TFF1	trefoil factor 1
A_24_P398370	0.00164	0.000111	1.49265
A_23_P386268	0.00259	0.000212	1.47917	C4orf26	chromosome 4 open reading frame 26
A_23_P161190	0.000476	1.97e-05	1.47348	VIM	vimentin
A_23_P142533	0.013	0.00194	1.45738	COL3A1	collagen type III alpha 1 chain
A_23_P406341	0.000181	5.33e-06	1.44228	AFAP1L2	actin filament associated protein 1 like 2
A_24_P355649	0.00037	1.4e-05	1.43539	FLI1	Fli-1 proto-oncogene, ETS transcription factor
A_32_P4018	0.00219	0.000167	1.43505	ROR1	receptor tyrosine kinase like orphan receptor 1
A_24_P13024	0.000773	3.92e-05	1.43085	SLC16A12	solute carrier family 16 member 12
A_23_P14083	0.00238	0.000189	1.4302	AMIGO2	adhesion molecule with Ig like domain 2
A_23_P206212	0.000596	2.71e-05	1.39688	THBS1	thrombospondin 1
A_23_P111995	0.00018	5.3e-06	1.39611	LOXL2	lysyl oxidase like 2
A_23_P12363	0.00416	0.000409	1.38535	ROR1	receptor tyrosine kinase like orphan receptor 1
A_23_P150609	0.000129	3.38e-06	1.3824	IGF2	insulin like growth factor 2
A_32_P134764	0.000125	3.19e-06	1.37674	CDH6	cadherin 6
A_23_P349966	0.00452	0.000459	1.35675	TMEM130	transmembrane protein 130
A_23_P501538	0.00284	0.00024	1.3471	HOXA3	homeobox A3
A_23_P65240	0.00167	0.000114	1.34469	COL4A1	collagen type IV alpha 1 chain
A_23_P164650	0.00122	7.39e-05	1.34167	APOE	apolipoprotein E
A_23_P127911	0.000123	3.12e-06	1.3408	PAMR1	peptidase domain containing associated with muscle regeneration 1
A_24_P18137	0.00527	0.00057	1.33831	NEFL	neurofilament, light polypeptide
A_23_P252052	0.000788	4.01e-05	1.33122	FILIP1L	filamin A interacting protein 1 like
A_32_P148322	0.000167	4.8e-06	1.33096	CDH6	cadherin 6
A_24_P319923	0.00235	0.000185	1.31622	MYLK	myosin light chain kinase
A_23_P122924	0.000775	3.94e-05	1.30744	INHBA	inhibin beta A subunit
A_24_P33770	0.000258	8.73e-06	1.30456	AFAP1L2	actin filament associated protein 1 like 2
A_32_P97169	0.00213	0.000161	1.299	GPC6	glypican 6
A_23_P133408	0.00126	7.76e-05	1.2987	CSF2	colony stimulating factor 2
A_23_P127584	0.0213	0.00379	1.29467	NNMT	nicotinamide N-methyltransferase
A_23_P21976	0.000239	7.9e-06	1.28705	CSPG4	chondroitin sulfate proteoglycan 4
A_23_P123234	0.0039	0.000375	1.28633
A_23_P218144	0.000131	3.46e-06	1.27635	LTBP2	latent transforming growth factor beta binding protein 2
A_24_P32151	0.000908	4.9e-05	1.26291	FAM101B	family with sequence similarity 101 member B
A_23_P84063	0.0043	0.000428	1.26269	NTM	neurotrimin
A_23_P78405	0.00082	4.23e-05	1.25773	LIPG	lipase G, endothelial type
A_23_P28815	0.00167	0.000114	1.24779	CYP24A1	cytochrome P450 family 24 subfamily A member 1
A_24_P727884	0.000119	2.99e-06	1.24114	KIAA1549L	KIAA1549 like
A_24_P935986	5.61e-05	1.15e-06	1.24101	BCAT1	branched chain amino acid transaminase 1
A_24_P535256	0.00249	0.0002	1.24096	INHBA	inhibin beta A subunit
A_24_P85300	0.000714	3.51e-05	1.22283	HEG1	heart development protein with EGF like domains 1
A_32_P167212	0.00161	0.000109	1.2208
A_23_P143817	0.00342	0.000312	1.21724	MYLK	myosin light chain kinase
A_23_P163787	0.000212	6.62e-06	1.21522	MMP2	matrix metallopeptidase 2
A_24_P125469	0.00201	0.000149	1.21293	LIPG	lipase G, endothelial type
A_24_P596251	0.00483	0.000507	1.21269
A_24_P177553	5.82e-14	6.29e-17	1.20914
A_24_P409971	0.0135	0.00205	1.20553	NEXN	nexilin F-actin binding protein
A_32_P13056	0.000491	2.06e-05	1.19909
A_24_P299474	8.23e-08	5.62e-10	1.19827	TENM2	teneurin transmembrane protein 2
A_23_P99802	0.000814	4.18e-05	1.1958	FLRT2	fibronectin leucine rich transmembrane protein 2
A_23_P405129	0.00301	0.00026	1.19318	LTBP2	latent transforming growth factor beta binding protein 2
A_23_P214897	0.000612	2.84e-05	1.18638	AKAP12	A-kinase anchoring protein 12
A_23_P214011	0.000218	6.96e-06	1.16871	CDH6	cadherin 6
A_32_P166693	0.000144	3.95e-06	1.16521	HEG1	heart development protein with EGF like domains 1
A_24_P687	0.00013	3.41e-06	1.15832	CDH6	cadherin 6
A_23_P47148	0.00639	0.000744	1.15427	NOX4	NADPH oxidase 4
A_24_P273726	0.00213	0.000161	1.14478	MSRB3	methionine sulfoxide reductase B3
A_24_P383609	0.000728	3.61e-05	1.12336	NANOS1	nanos C2HC-type zinc finger 1
A_23_P340698	0.0132	0.00198	1.12216	MMP12	matrix metallopeptidase 12
A_23_P344673	0.000475	1.96e-05	1.10484	HAGLR	HOXD antisense growth-associated long non-coding RNA
A_32_P152437	0.000349	1.3e-05	1.10325	AKAP12	A-kinase anchoring protein 12
A_23_P204208	0.00747	0.000924	1.1025	KLRD1	killer cell lectin like receptor D1
A_23_P33196	0.000962	5.33e-05	1.10066	COL5A2	collagen type V alpha 2 chain
A_23_P144959	0.00675	0.000803	1.10057	VCAN	versican
A_24_P413126	0.00181	0.000128	1.09633	PMEPA1	prostate transmembrane protein, androgen induced 1
A_32_P201434	0.0356	0.00755	1.09489
A_24_P111106	0.00367	0.000345	1.09178	FGF1	fibroblast growth factor 1
A_24_P929003	0.00463	0.000477	1.09123	ITGB3	integrin subunit beta 3
A_23_P106389	0.00352	0.000325	1.08546	SEMA7A	semaphorin 7A (John Milton Hagen blood group)
A_24_P260101	0.0225	0.0041	1.08196	MME	membrane metallo-endopeptidase
A_23_P113777	0.00278	0.000233	1.08131	ITGBL1	integrin subunit beta like 1
A_24_P52697	7.7e-05	1.71e-06	1.07934	H19	H19, imprinted maternally expressed transcript (non-protein coding)
A_23_P150316	0.0161	0.0026	1.0774	MMP12	matrix metallopeptidase 12
A_23_P254522	0.00071	3.47e-05	1.07331	COL4A4	collagen type IV alpha 4 chain
A_23_P132619	0.00282	0.000238	1.07022	OXTR	oxytocin receptor
A_32_P171043	0.000814	4.18e-05	1.06899	CCBE1	collagen and calcium binding EGF domains 1
A_23_P10391	0.000882	4.68e-05	1.06866	COL5A2	collagen type V alpha 2 chain
A_24_P739344	0.002	0.000147	1.06437	NOX4	NADPH oxidase 4
A_23_P111311	0.000692	3.36e-05	1.06408	AKAP12	A-kinase anchoring protein 12
A_23_P95802	5.91e-05	1.23e-06	1.06336	CNTNAP2	contactin associated protein-like 2
A_32_P16204	0.000208	6.45e-06	1.05805	LINC01116	long intergenic non-protein coding RNA 1116
A_32_P72351	0.002	0.000148	1.05381	FAM20C	family with sequence similarity 20 member C
A_24_P236235	0.00115	6.78e-05	1.04692	FLRT2	fibronectin leucine rich transmembrane protein 2
A_32_P42224	0.000773	3.91e-05	1.03893
A_24_P314477	0.00312	0.000273	1.02946	TUBB2B	tubulin beta 2B class IIb
A_24_P339944	0.00177	0.000124	1.02469	PDGFB	platelet derived growth factor subunit B
A_24_P532232	0.0147	0.00229	1.02235	CREB5	cAMP responsive element binding protein 5
A_23_P64121	0.00334	0.000301	1.02098	KIAA1549L	KIAA1549 like
A_23_P35995	0.00289	0.000246	1.01744	CLMP	CXADR like membrane protein
A_23_P1029	0.00359	0.000335	1.01677	MFAP2	microfibrillar associated protein 2
A_23_P213336	0.0102	0.00139	1.0084	FGF1	fibroblast growth factor 1
A_23_P19030	4.49e-05	8.53e-07	1.00355	ARSI	arylsulfatase family member I
A_23_P4494	0.00026	8.88e-06	1.00247	DSC2	desmocollin 2
A_23_P72096	0.00184	0.000131	1.0015	IL1A	interleukin 1 alpha
A_24_P142118	0.00108	6.18e-05	1.00058	THBS1	thrombospondin 1
A_23_P311895	0.00132	8.22e-05	0.99621	CLIC5	chloride intracellular channel 5
A_23_P146946	0.00087	4.59e-05	0.992293	CST6	cystatin E/M
A_23_P166459	0.000349	1.3e-05	0.989384	LGALS1	galectin 1
A_32_P194312	2.88e-05	4.99e-07	0.981101	SDK2	sidekick cell adhesion molecule 2
A_23_P127565	0.000127	3.27e-06	0.981066	LAYN	layilin
A_23_P96383	0.00504	0.000536	0.980063	SRPX	sushi repeat containing protein, X-linked
A_23_P353524	7.25e-05	1.6e-06	0.977357	IVL	involucrin
A_24_P123385	0.000138	3.73e-06	0.971494	MAP1B	microtubule associated protein 1B
A_23_P431388	0.0119	0.00173	0.965283	SPOCD1	SPOC domain containing 1
A_23_P42575	0.00044	1.79e-05	0.964719	CALD1	caldesmon 1
A_32_P153195	0.000129	3.35e-06	0.964697	BEAN1	brain expressed, associated with NEDD4, 1
A_24_P291814	1.16e-06	1.13e-08	0.964387	COL12A1	collagen type XII alpha 1 chain
A_23_P416774	0.00178	0.000125	0.963537	CLIC5	chloride intracellular channel 5
A_23_P92929	0.0238	0.00441	0.961345	PRR16	proline rich 16
A_32_P90812	2.45e-05	4.1e-07	0.959918	KCNJ5	potassium voltage-gated channel subfamily J member 5
A_23_P132956	0.00315	0.000277	0.956453	UCHL1	ubiquitin C-terminal hydrolase L1
A_32_P92642	0.0122	0.00179	0.955855
A_32_P405759	0.0101	0.00138	0.952006	COL22A1	collagen type XXII alpha 1 chain
A_24_P296808	0.00245	0.000196	0.950229	PNMAL1	paraneoplastic Ma antigen family like 1
A_24_P356930	0.00179	0.000125	0.948401	CYP24A1	cytochrome P450 family 24 subfamily A member 1
A_23_P73787	0.00877	0.00114	0.948106	NUDT10	nudix hydrolase 10
A_23_P154605	0.000738	3.68e-05	0.947288	SULF2	sulfatase 2
A_23_P1102	0.14	0.0503	0.946976	ACTA1	actin, alpha 1, skeletal muscle
A_24_P124624	0.000622	2.9e-05	0.94553	OLR1	oxidized low density lipoprotein receptor 1
A_24_P879740	0.000113	2.76e-06	0.944586	MAP1B	microtubule associated protein 1B
A_32_P39944	0.00172	0.000118	0.944402
A_23_P202927	4.67e-05	9.07e-07	0.935728	KCNJ5	potassium voltage-gated channel subfamily J member 5
A_23_P100711	0.0083	0.00106	0.935249	PMP22	peripheral myelin protein 22
A_23_P65518	0.0372	0.00803	0.934684	DACT1	dishevelled binding antagonist of beta catenin 1
A_32_P226525	0.00322	0.000286	0.933682
A_23_P214168	1.69e-05	2.63e-07	0.932309	COL12A1	collagen type XII alpha 1 chain
A_23_P212061	0.00335	0.000303	0.930372	MME	membrane metallo-endopeptidase
A_24_P921366	0.00126	7.69e-05	0.928374	CALD1	caldesmon 1
A_24_P817863	0.00154	0.000103	0.927645	UNC80	unc-80 homolog, NALCN activator
A_23_P118158	0.0275	0.00536	0.925315	HS3ST2	heparan sulfate-glucosamine 3-sulfotransferase 2
A_32_P181638	0.000696	3.38e-05	0.923194	BVES	blood vessel epicardial substance
A_24_P904845	0.00315	0.000278	0.92156
A_23_P301521	0.00173	0.000119	0.920521	KIAA1462	KIAA1462
A_23_P26847	0.000636	3e-05	0.920104	SOX9	SRY-box 9
A_23_P10025	0.00155	0.000103	0.920082	NELL2	neural EGFL like 2
A_23_P119202	0.00478	0.000499	0.918799	CD70	CD70 molecule
A_23_P422212	0.00116	6.85e-05	0.917767	SLC35F3	solute carrier family 35 member F3
A_23_P164958	0.0107	0.00149	0.914427	CCDC8	coiled-coil domain containing 8
A_24_P918137	1.96e-07	1.45e-09	0.908961
A_24_P139899	0.00662	0.00078	0.905679	SYT11	synaptotagmin 11
A_32_P198731	0.000441	1.79e-05	0.903707	NEURL1B	neuralized E3 ubiquitin protein ligase 1B
A_23_P64404	0.00142	9.09e-05	0.902637	FADS3	fatty acid desaturase 3
A_32_P437004	0.00653	0.000768	0.902289	XG	Xg blood group
A_23_P133656	0.00146	9.5e-05	0.898651	LAMA4	laminin subunit alpha 4
A_23_P202327	0.000751	3.77e-05	0.897062	ADAM12	ADAM metallopeptidase domain 12
A_23_P79518	0.00486	0.00051	0.892753	IL1B	interleukin 1 beta
A_23_P57089	0.00417	0.000411	0.892566	PMEPA1	prostate transmembrane protein, androgen induced 1
A_23_P210100	0.000689	3.34e-05	0.886619	CYP26B1	cytochrome P450 family 26 subfamily B member 1
A_23_P209449	0.000354	1.33e-05	0.886024	FZD7	frizzled class receptor 7
A_32_P217261	0.00182	0.000129	0.885228
A_32_P218734	0.0016	0.000108	0.883204	COL5A2	collagen type V alpha 2 chain
A_32_P117016	0.00189	0.000135	0.883067	ALDH1L2	aldehyde dehydrogenase 1 family member L2
A_24_P39508	0.000689	3.33e-05	0.880572	CMTM3	CKLF like MARVEL transmembrane domain containing 3
A_24_P347378	0.00591	0.00067	0.880039	ALOX5AP	arachidonate 5-lipoxygenase activating protein
A_23_P69179	0.000131	3.45e-06	0.879	P3H2	prolyl 3-hydroxylase 2
A_23_P139881	0.000571	2.55e-05	0.875667	CCND2	cyclin D2
A_23_P123402	0.00026	8.86e-06	0.871969	TRIM55	tripartite motif containing 55
A_23_P77493	0.00397	0.000383	0.871361	TUBB3	tubulin beta 3 class III
A_23_P33123	0.000173	5.03e-06	0.86858	SPOCK3	sparc/osteonectin, cwcv and kazal-like domains proteoglycan (testican) 3
A_23_P104275	0.00664	0.000783	0.868136	SLC16A12	solute carrier family 16 member 12
A_24_P371281	0.0725	0.02	0.8662	SLC35G2	solute carrier family 35 member G2
A_23_P111766	5.79e-05	1.19e-06	0.865711
A_23_P302005	0.000639	3.03e-05	0.865372	STON1	stonin 1
A_23_P110319	3.1e-05	5.49e-07	0.861059	CWH43	cell wall biogenesis 43 C-terminal homolog
A_23_P110791	0.00201	0.000149	0.859073	CSF1R	colony stimulating factor 1 receptor
A_23_P56197	0.000204	6.27e-06	0.858561	CRLF1	cytokine receptor like factor 1
A_24_P270044	0.000247	8.21e-06	0.855144	CLMP	CXADR like membrane protein
A_23_P140928	0.000962	5.34e-05	0.854827	TMC7	transmembrane channel like 7
A_24_P347411	0.084	0.0245	0.854601	POSTN	periostin
A_32_P39669	0.001	5.62e-05	0.853838
A_32_P198179	0.00877	0.00114	0.85379
A_23_P21092	0.0109	0.00153	0.853787	CALB2	calbindin 2
A_23_P76136	0.0109	0.00153	0.853586	TSPAN11	tetraspanin 11
A_23_P110052	0.00201	0.000149	0.8535	FOXL2	forkhead box L2
A_23_P88865	0.00166	0.000113	0.850102	CMTM3	CKLF like MARVEL transmembrane domain containing 3
A_23_P158675	0.000141	3.85e-06	0.849166	KCNMB2	potassium calcium-activated channel subfamily M regulatory beta subunit 2
A_23_P152305	0.0539	0.0133	0.848549	CDH11	cadherin 11
A_23_P120243	0.00158	0.000106	0.848543	HOXD1	homeobox D1
A_23_P351667	0.00579	0.000649	0.846988	ADAM23	ADAM metallopeptidase domain 23
A_24_P212389	0.00325	0.000289	0.84622	MSRB3	methionine sulfoxide reductase B3
A_32_P300427	0.0382	0.00833	0.842237	APCDD1L	APC down-regulated 1 like
A_23_P206018	0.000996	5.58e-05	0.842084	TPM1	tropomyosin 1 (alpha)
A_23_P201636	0.000414	1.63e-05	0.838102	LAMC2	laminin subunit gamma 2
A_23_P207520	0.0753	0.021	0.83762	COL1A1	collagen type I alpha 1 chain
A_23_P72487	0.00296	0.000254	0.831493	XG	Xg blood group
A_23_P24104	0.000114	2.8e-06	0.831055	PLAU	plasminogen activator, urokinase
A_23_P202881	0.00174	0.000121	0.828649	FEZ1	fasciculation and elongation protein zeta 1
A_24_P236935	0.000314	1.14e-05	0.828203	KLK6	kallikrein related peptidase 6
A_23_P163087	0.00126	7.72e-05	0.826589	NID2	nidogen 2
A_24_P108262	1.65e-05	2.56e-07	0.826486	SDK2	sidekick cell adhesion molecule 2
A_24_P931744	8.82e-08	6.07e-10	0.825485	STBD1	starch binding domain 1
A_23_P167812	0.000213	6.71e-06	0.825407	RBM24	RNA binding motif protein 24
A_23_P315571	0.00058	2.62e-05	0.824393	RFTN1	raftlin, lipid raft linker 1
A_23_P134835	0.00468	0.000484	0.822955	CSGALNACT1	chondroitin sulfate N-acetylgalactosaminyltransferase 1
A_24_P44462	0.000833	4.36e-05	0.822206	TPM1	tropomyosin 1 (alpha)
A_32_P64286	0.000176	5.14e-06	0.821954	SIX3-AS1	SIX3 antisense RNA 1
A_23_P131308	6.94e-05	1.52e-06	0.820282	CYP27A1	cytochrome P450 family 27 subfamily A member 1
A_23_P2543	0.0582	0.0147	0.819583	CUX2	cut like homeobox 2
A_32_P69136	0.00243	0.000193	0.817364
A_24_P158089	0.0145	0.00225	0.814981	SERPINE1	serpin family E member 1
A_23_P4953	0.0155	0.00246	0.81106	PNMAL1	paraneoplastic Ma antigen family like 1
A_23_P391586	0.00293	0.000251	0.810533	TPM1	tropomyosin 1 (alpha)
A_24_P627874	0.0487	0.0116	0.808675
A_23_P302470	0.011	0.00155	0.807865	SULT1B1	sulfotransferase family 1B member 1
A_32_P59355	0.0598	0.0153	0.807527
A_23_P140748	0.00043	1.72e-05	0.807179	NDRG4	NDRG family member 4
A_24_P13041	0.00357	0.000331	0.807057	RTKN2	rhotekin 2
A_23_P366035	5.83e-05	1.21e-06	0.80679	ABHD12B	abhydrolase domain containing 12B
A_24_P250922	0.0132	0.00198	0.805589	PTGS2	prostaglandin-endoperoxide synthase 2
A_23_P139682	0.000266	9.16e-06	0.805504	PZP	PZP, alpha-2-macroglobulin like
A_23_P87528	0.00861	0.00111	0.805226	BCAT1	branched chain amino acid transaminase 1
A_24_P915376	0.000201	6.14e-06	0.80419	TNNT3	troponin T3, fast skeletal type
A_23_P319549	0.03	0.006	0.803498	CFAP57	cilia and flagella associated protein 57
A_23_P99515	0.056	0.014	0.802453	MEDAG	mesenteric estrogen dependent adipogenesis
A_23_P364024	0.00497	0.000526	0.801919	GLIPR1	GLI pathogenesis related 1
A_23_P304110	1.86e-05	2.96e-07	0.801731	SOWAHA	sosondowah ankyrin repeat domain family member A
A_23_P141055	6.42e-05	1.38e-06	0.801649	TGFB1I1	transforming growth factor beta 1 induced transcript 1
A_24_P270235	7.25e-05	1.6e-06	0.800326	CCND2	cyclin D2
A_23_P344555	0.00562	0.000623	0.799918	NEDD9	neural precursor cell expressed, developmentally down-regulated 9
A_23_P22526	0.00913	0.0012	0.796887	HEPH	hephaestin
A_32_P41744	0.00143	9.2e-05	0.796428
A_24_P100613	0.000377	1.44e-05	0.796042	LAMA1	laminin subunit alpha 1
A_23_P146146	0.00154	0.000103	0.793797	ATP6V0D2	ATPase H+ transporting V0 subunit d2
A_32_P182186	0.000118	2.94e-06	0.791433
A_23_P65779	0.00232	0.000182	0.789843	STRA6	stimulated by retinoic acid 6
A_23_P66739	0.0653	0.0173	0.789701	SLC13A5	solute carrier family 13 member 5
A_23_P349147	0.000573	2.57e-05	0.789069
A_32_P125771	7.06e-06	9.36e-08	0.783583	RGS22	regulator of G-protein signaling 22
A_24_P497464	0.0605	0.0156	0.783013	SOX9-AS1	SOX9 antisense RNA 1
A_23_P352861	0.00393	0.00038	0.781244	TRBV5-4	T cell receptor beta variable 5-4
A_23_P209167	0.0112	0.00158	0.780852	FSTL3	follistatin like 3
A_23_P56505	0.0456	0.0106	0.779772	ITGA4	integrin subunit alpha 4
A_23_P211233	0.00775	0.000972	0.778059	COL6A2	collagen type VI alpha 2 chain
A_32_P181222	0.0049	0.000515	0.775739	KCNMA1	potassium calcium-activated channel subfamily M alpha 1
A_23_P153917	0.000191	5.74e-06	0.774667	MAP2	microtubule associated protein 2
A_32_P24382	0.017	0.00281	0.773124	KRTAP2-3	keratin associated protein 2-3
A_32_P85593	0.0289	0.00573	0.772514	LOC100101478	H2B histone family member M pseudogene
A_24_P52921	0.000553	2.46e-05	0.771811	BCAT1	branched chain amino acid transaminase 1
A_23_P110569	0.000216	6.86e-06	0.770673	TRIM36	tripartite motif containing 36
A_23_P394809	0.00474	0.000494	0.770558	DTNA	dystrobrevin alpha
A_23_P24507	0.00928	0.00123	0.769881	LOC643733	caspase 4, apoptosis-related cysteine peptidase pseudogene
A_23_P360302	0.00791	0.001	0.769293	GUCY2F	guanylate cyclase 2F, retinal
A_23_P84399	0.000157	4.41e-06	0.768875	CNTNAP2	contactin associated protein-like 2
A_23_P21260	0.000119	2.97e-06	0.768057
A_23_P160968	4.49e-05	8.57e-07	0.766242	LAMC2	laminin subunit gamma 2
A_23_P161659	0.0116	0.00167	0.765281	SYT13	synaptotagmin 13
A_32_P173357	0.0606	0.0156	0.763938	LOC439938	uncharacterized LOC439938
A_23_P386320	0.00686	0.000819	0.761201	MELTF	melanotransferrin
A_23_P158593	0.0505	0.0122	0.759513	COL5A1	collagen type V alpha 1 chain
A_23_P102058	0.00299	0.000258	0.759101	MATN3	matrilin 3
A_23_P93960	0.124	0.0423	0.758123	PRSS37	protease, serine 37
A_24_P231483	0.000114	2.81e-06	0.755967	MAP2	microtubule associated protein 2
A_32_P93584	0.00181	0.000128	0.754187
A_23_P23346	0.00117	6.97e-05	0.754086	MLLT11	myeloid/lymphoid or mixed-lineage leukemia; translocated to, 11
A_23_P18798	0.00238	0.000188	0.753198	PCDHB9	protocadherin beta 9
A_23_P334447	0.000136	3.64e-06	0.752155	FHAD1	forkhead associated phosphopeptide binding domain 1
A_23_P43810	8.66e-05	1.99e-06	0.751975	LTBP1	latent transforming growth factor beta binding protein 1
A_24_P926400	1.52e-16	9.36e-20	-0.750323
A_24_P174503	2.02e-10	6.1e-13	-0.751993	AMT	aminomethyltransferase
A_23_P53257	7.15e-08	4.77e-10	-0.753601	AVIL	advillin
A_23_P75915	6.87e-12	1.36e-14	-0.758072	RIC3	RIC3 acetylcholine receptor chaperone
A_24_P289260	0.0414	0.0093	-0.758106	DACT2	dishevelled binding antagonist of beta catenin 2
A_23_P502060	0.0014	8.85e-05	-0.759732	AQP6	aquaporin 6
A_24_P80915	4.48e-06	5.62e-08	-0.761717	BCLAF1	BCL2 associated transcription factor 1
A_23_P500433	1.08e-14	1.04e-17	-0.763834	CARD9	caspase recruitment domain family member 9
A_23_P303087	0.00136	8.55e-05	-0.765229	PTN	pleiotrophin
A_24_P395966	0.000358	1.35e-05	-0.765612	ZBP1	Z-DNA binding protein 1
A_23_P338542	0.0402	0.00893	-0.766751	SLC5A8	solute carrier family 5 member 8
A_24_P924521	0.00298	0.000257	-0.768309
A_23_P8541	1.26e-12	2.11e-15	-0.768523
A_23_P366125	5.75e-12	1.1e-14	-0.768889	EME2	essential meiotic structure-specific endonuclease subunit 2
A_23_P66481	0.0121	0.00177	-0.770111	RTN4RL1	reticulon 4 receptor like 1
A_32_P24372	3e-06	3.48e-08	-0.7708	TBC1D3B	TBC1 domain family member 3B
A_23_P390157	2.32e-06	2.48e-08	-0.771369	AVIL	advillin
A_24_P41662	0.0971	0.0301	-0.773947
A_32_P213002	4.26e-13	5.72e-16	-0.774295
A_23_P205057	3.83e-05	7.08e-07	-0.77531	PCDH17	protocadherin 17
A_24_P623989	0.000276	9.6e-06	-0.775897	ITGB2-AS1	ITGB2 antisense RNA 1
A_24_P274270	2.75e-06	3.11e-08	-0.7779	STAT1	signal transducer and activator of transcription 1
A_24_P223874	0.00613	0.000705	-0.778235	SFTPA1	surfactant protein A1
A_23_P59452	0.0319	0.00653	-0.780257	AOC1	amine oxidase, copper containing 1
A_23_P206501	1.74e-08	9.77e-11	-0.781823	CLEC18B	C-type lectin domain family 18 member B
A_23_P346048	3.49e-09	1.61e-11	-0.784335	HERC2P2	hect domain and RLD 2 pseudogene 2
A_32_P330000	6.7e-11	1.76e-13	-0.787106	MIRLET7BHG	MIRLET7B host gene
A_32_P35106	0.000411	1.62e-05	-0.787451
A_23_P39682	0.00657	0.000772	-0.787963	ZAP70	zeta chain of T cell receptor associated protein kinase 70
A_23_P393401	1.54e-12	2.66e-15	-0.788123	PDXDC2P	pyridoxal dependent decarboxylase domain containing 2, pseudogene
A_32_P211080	3.02e-09	1.35e-11	-0.789386	HERC2P2	hect domain and RLD 2 pseudogene 2
A_23_P170978	4.62e-14	4.85e-17	-0.79262	ZNF692	zinc finger protein 692
A_32_P169491	5.44e-11	1.33e-13	-0.793089
A_24_P60217	0.0046	0.000472	-0.797598
A_24_P148796	8.28e-19	2.3e-22	-0.798247	MST1	macrophage stimulating 1
A_23_P329271	2.08e-11	4.75e-14	-0.798416	MC1R	melanocortin 1 receptor
A_32_P216872	9.79e-15	9.07e-18	-0.802282	PDXDC2P	pyridoxal dependent decarboxylase domain containing 2, pseudogene
A_23_P41470	1.04e-05	1.46e-07	-0.807688	DDX60	DEXD/H-box helicase 60
A_23_P155123	1.31e-15	1.09e-18	-0.80874	CYP2D6	cytochrome P450 family 2 subfamily D member 6
A_24_P334361	1.81e-05	2.87e-07	-0.810512	DDX60	DEXD/H-box helicase 60
A_24_P696924	0.000383	1.47e-05	-0.814072	MAP3K8	mitogen-activated protein kinase kinase kinase 8
A_24_P313210	3.48e-10	1.17e-12	-0.814639
A_23_P32177	0.00691	0.000829	-0.815209	LHX6	LIM homeobox 6
A_24_P498767	9.02e-12	1.95e-14	-0.816861	SNHG8	small nucleolar RNA host gene 8
A_23_P71790	9.15e-19	2.82e-22	-0.819478	MAMDC4	MAM domain containing 4
A_24_P920573	0.00296	0.000255	-0.821002
A_24_P118892	4.37e-07	3.78e-09	-0.822128	IRF7	interferon regulatory factor 7
A_23_P203698	0.00728	0.00089	-0.822634
A_23_P209227	0.00229	0.000179	-0.823184	CACNB4	calcium voltage-gated channel auxiliary subunit beta 4
A_24_P324424	0.166	0.0646	-0.823242
A_32_P85273	1.47e-10	4.09e-13	-0.824597	GOLGA8A	golgin A8 family member A
A_23_P257164	4.13e-13	5.35e-16	-0.826561	AMT	aminomethyltransferase
A_23_P59130	6.11e-07	5.62e-09	-0.828355	LY6G5B	lymphocyte antigen 6 complex, locus G5B
A_24_P330112	0.0116	0.00166	-0.828384	MAGOHB	mago homolog B, exon junction complex core component
A_23_P125033	2.56e-06	2.85e-08	-0.829011
A_24_P348006	0.0171	0.00283	-0.830491	RASD1	ras related dexamethasone induced 1
A_23_P356581	4.97e-13	7.06e-16	-0.830773	ROBO3	roundabout guidance receptor 3
A_24_P211044	0.000437	1.76e-05	-0.830994	CSH1	chorionic somatomammotropin hormone 1
A_24_P290623	0.00044	1.79e-05	-0.831904	ZSWIM8	zinc finger SWIM-type containing 8
A_23_P409438	2.33e-06	2.5e-08	-0.833813	IFNL2	interferon lambda 2
A_23_P32175	0.00513	0.000549	-0.834824	LHX6	LIM homeobox 6
A_23_P45424	7.42e-08	4.97e-10	-0.837178	ITGB1BP2	integrin subunit beta 1 binding protein 2
A_32_P26721	1.36e-05	2.03e-07	-0.837923
A_23_P136721	2.83e-07	2.23e-09	-0.84382	ERVH-4	endogenous retrovirus group H member 4
A_23_P37623	3.22e-15	2.78e-18	-0.848086	GOLGA8A	golgin A8 family member A
A_24_P170801	5.45e-11	1.36e-13	-0.849103	MROH1	maestro heat like repeat family member 1
A_23_P300174	2.07e-13	2.56e-16	-0.850698	HEXDC	hexosaminidase D
A_24_P355609	0.00172	0.000118	-0.851314	MRGPRF	MAS related GPR family member F
A_23_P342138	0.00349	0.000321	-0.853659	ADAMTSL1	ADAMTS like 1
A_24_P910580	8.53e-11	2.29e-13	-0.858262	GOLGA8A	golgin A8 family member A
A_23_P110445	1.84e-13	2.21e-16	-0.859502	APBB3	amyloid beta precursor protein binding family B member 3
A_23_P137751	0.00059	2.68e-05	-0.859617	FAM46C	family with sequence similarity 46 member C
A_32_P119569	2.28e-07	1.74e-09	-0.860923	GOLGA8EP	golgin A8 family member E, pseudogene
A_32_P54553	2.94e-06	3.39e-08	-0.862384
A_23_P163238	8.47e-06	1.16e-07	-0.862502	STRC	stereocilin
A_24_P566916	5.38e-13	8.08e-16	-0.864112	NEAT1	nuclear paraspeckle assembly transcript 1 (non-protein coding)
A_23_P19134	0.000437	1.76e-05	-0.866647	ADGRV1	adhesion G protein-coupled receptor V1
A_24_P852001	7.85e-05	1.76e-06	-0.869564	IGK///IGKV3-20///IGHV3-23	immunoglobulin kappa locus///immunoglobulin kappa variable 3-20///immunoglobulin heavy variable 3-23
A_23_P129496	0.00409	0.000399	-0.873904	CDH5	cadherin 5
A_32_P59116	2.88e-10	9.28e-13	-0.875451	GOLGA8F	golgin A8 family member F
A_24_P928772	0.00786	0.000993	-0.875742	POLB	DNA polymerase beta
A_24_P930963	9.61e-05	2.27e-06	-0.878763	LMF1	lipase maturation factor 1
A_23_P207170	0.000219	7.01e-06	-0.879455	CSH1	chorionic somatomammotropin hormone 1
A_24_P203000	0.011	0.00156	-0.880861	IL2RB	interleukin 2 receptor subunit beta
A_23_P250385	0.000221	7.09e-06	-0.882189	HIST1H1B	histone cluster 1, H1b
A_24_P921623	5.38e-07	4.79e-09	-0.887243
A_24_P268729	1.61e-05	2.48e-07	-0.892211	HEMK1	HemK methyltransferase family member 1
A_32_P19294	0.00261	0.000215	-0.893887	GLT1D1	glycosyltransferase 1 domain containing 1
A_32_P102383	0.00148	9.71e-05	-0.895886
A_23_P157895	0.0159	0.00255	-0.896704	DMRT3	doublesex and mab-3 related transcription factor 3
A_23_P212945	0.0109	0.00153	-0.902157	HTN3	histatin 3
A_24_P586712	0.000893	4.76e-05	-0.902781	TPRG1	tumor protein p63 regulated 1
A_23_P385105	0.000686	3.32e-05	-0.905937	PLCD4	phospholipase C delta 4
A_23_P211468	4.06e-10	1.42e-12	-0.906344
A_24_P339024	3.27e-06	3.82e-08	-0.909269
A_32_P122373	1.09e-15	8.39e-19	-0.911854	MST1P2	macrophage stimulating 1 pseudogene 2
A_24_P128308	0.00172	0.000118	-0.914386
A_23_P306511	0.00119	7.16e-05	-0.915628	CMAHP	cytidine monophospho-N-acetylneuraminic acid hydroxylase, pseudogene
A_24_P917951	7.04e-12	1.43e-14	-0.91676	NOC2L	NOC2 like nucleolar associated transcriptional repressor
A_32_P797019	2.05e-05	3.31e-07	-0.918413
A_23_P250353	6.03e-08	3.85e-10	-0.921152	HERC6	HECT and RLD domain containing E3 ubiquitin protein ligase family member 6
A_32_P171488	4.6e-05	8.9e-07	-0.923453
A_24_P92183	8.34e-14	9.28e-17	-0.923756	PABPC1L	poly(A) binding protein cytoplasmic 1 like
A_23_P250358	4.28e-06	5.28e-08	-0.924689	HERC6	HECT and RLD domain containing E3 ubiquitin protein ligase family member 6
A_23_P132159	2.56e-06	2.84e-08	-0.927965	USP18	ubiquitin specific peptidase 18
A_23_P138524	0.0115	0.00165	-0.928507	CPXM2	carboxypeptidase X, M14 family member 2
A_23_P103971	0.00307	0.000267	-0.92895	CYP4Z1	cytochrome P450 family 4 subfamily Z member 1
A_23_P218817	1.11e-19	1.72e-23	-0.933205	CPT1B	carnitine palmitoyltransferase 1B
A_23_P12767	0.000504	2.14e-05	-0.937985	CYP2C9	cytochrome P450 family 2 subfamily C member 9
A_32_P49764	0.00614	0.000707	-0.938365
A_23_P109881	7.49e-17	4.39e-20	-0.938955	ITIH4	inter-alpha-trypsin inhibitor heavy chain family member 4
A_23_P8723	0.000428	1.71e-05	-0.942952	KLRG2	killer cell lectin like receptor G2
A_23_P109934	8.82e-14	1.01e-16	-0.944116	HEMK1	HemK methyltransferase family member 1
A_24_P419087	1.95e-07	1.44e-09	-0.948152	AVIL	advillin
A_24_P50950	0.000235	7.67e-06	-0.951009	CCDC88B	coiled-coil domain containing 88B
A_23_P436484	2.59e-16	1.68e-19	-0.951714
A_23_P501193	0.00158	0.000106	-0.958223	KCNJ16	potassium voltage-gated channel subfamily J member 16
A_23_P118392	0.00416	0.000409	-0.959065	RASD1	ras related dexamethasone induced 1
A_23_P18452	0.000509	2.17e-05	-0.959119	CXCL9	C-X-C motif chemokine ligand 9
A_32_P315178	0.000309	1.11e-05	-0.961963	ATP13A5	ATPase 13A5
A_23_P93360	3.73e-14	3.8e-17	-0.964071	AGER	advanced glycosylation end-product specific receptor
A_23_P78585	0.00784	0.00099	-0.964926	CYP2F1	cytochrome P450 family 2 subfamily F member 1
A_23_P250914	1.15e-05	1.66e-07	-0.968049	ATP6V1C2	ATPase H+ transporting V1 subunit C2
A_23_P420942	3.39e-10	1.13e-12	-0.971345	MT1E	metallothionein 1E
A_32_P202859	0.00245	0.000196	-0.97596	H1FNT	H1 histone family member N, testis specific
A_24_P102293	0.00112	6.54e-05	-0.977662	SLITRK5	SLIT and NTRK like family member 5
A_24_P316586	8.28e-19	2.09e-22	-0.978654	DUOX1	dual oxidase 1
A_24_P200831	1.15e-08	6.14e-11	-0.979652	MLXIPL	MLX interacting protein like
A_23_P97283	2.68e-13	3.39e-16	-0.983968	PAQR6	progestin and adipoQ receptor family member 6
A_23_P89981	0.00237	0.000187	-0.985015	CYP2F1	cytochrome P450 family 2 subfamily F member 1
A_23_P86470	1.11e-05	1.57e-07	-0.992069	CH25H	cholesterol 25-hydroxylase
A_32_P103669	0.00191	0.000137	-0.993941	GOLGA6C	golgin A6 family member C
A_24_P920748	2.8e-17	1.56e-20	-0.994418	CLASRP	CLK4 associating serine/arginine rich protein
A_23_P325100	0.0179	0.003	-0.994549	DMRT3	doublesex and mab-3 related transcription factor 3
A_23_P315364	0.00209	0.000157	-0.999143	CXCL2	C-X-C motif chemokine ligand 2
A_32_P132206	3.51e-07	2.82e-09	-1.00214	USP18	ubiquitin specific peptidase 18
A_23_P150583	0.00327	0.000292	-1.00302	SCGB1A1	secretoglobin family 1A member 1
A_23_P110712	3.98e-07	3.27e-09	-1.00364	DUSP1	dual specificity phosphatase 1
A_23_P33511	4.74e-16	3.22e-19	-1.00392
A_24_P943205	0.000945	5.2e-05	-1.01018	EPSTI1	epithelial stromal interaction 1 (breast)
A_24_P378019	1.34e-09	5.32e-12	-1.01306	IRF7	interferon regulatory factor 7
A_23_P164307	0.00202	0.00015	-1.01422	MINK1	misshapen like kinase 1
A_23_P337800	2.3e-05	3.79e-07	-1.01695	IFNL1	interferon lambda 1
A_23_P385199	0.00126	7.71e-05	-1.01698	EPHA10	EPH receptor A10
A_24_P706953	0.00497	0.000527	-1.01857	TMEM213	transmembrane protein 213
A_23_P97141	0.00312	0.000274	-1.02729	RGS1	regulator of G-protein signaling 1
A_24_P127491	0.00219	0.000168	-1.03275	HHIPL1	HHIP like 1
A_24_P145163	0.000327	1.21e-05	-1.03321	TLL1	tolloid like 1
A_23_P252253	0.0368	0.0079	-1.03715	STATH	statherin
A_23_P81158	0.00389	0.000374	-1.03957	ADH1C	alcohol dehydrogenase 1C (class I), gamma polypeptide
A_23_P145786	2e-10	5.94e-13	-1.04758	MLXIPL	MLX interacting protein like
A_24_P491087	5.86e-10	2.15e-12	-1.05022	CCT6P1	chaperonin containing TCP1 subunit 6 pseudogene 1
A_23_P20814	4.2e-07	3.53e-09	-1.05448	DDX58	DEXD/H-box helicase 58
A_23_P302672	0.000457	1.87e-05	-1.05515	DDIT4L	DNA damage inducible transcript 4 like
A_23_P254442	1.45e-14	1.43e-17	-1.05695	LOC155060	AI894139 pseudogene
A_23_P357504	5.5e-11	1.39e-13	-1.05868
A_32_P140030	0.000372	1.41e-05	-1.05959	FOXN4	forkhead box N4
A_23_P58359	0.00399	0.000386	-1.06136	ADH1A	alcohol dehydrogenase 1A (class I), alpha polypeptide
A_32_P89827	0.000222	7.12e-06	-1.06395	TPTE2P6	transmembrane phosphoinositide 3-phosphatase and tensin homolog 2 pseudogene 6
A_24_P203696	0.00418	0.000413	-1.06508	CYP2A7P1	cytochrome P450 family 2 subfamily A member 7 pseudogene 1
A_23_P98686	2.8e-17	1.48e-20	-1.07742	PGGHG	protein-glucosylgalactosylhydroxylysine glucosidase
A_23_P72737	1.2e-05	1.74e-07	-1.09116	IFITM1	interferon induced transmembrane protein 1
A_23_P385690	0.00129	7.99e-05	-1.10368	WNT3A	Wnt family member 3A
A_32_P141682	0.00177	0.000124	-1.11616	EVPLL	envoplakin like
A_23_P370027	2.88e-18	9.78e-22	-1.11649	GGT7	gamma-glutamyltransferase 7
A_24_P289273	1.76e-08	9.93e-11	-1.12314	RGR	retinal G protein coupled receptor
A_23_P71774	0.00172	0.000119	-1.12322	IFNB1	interferon beta 1
A_23_P328740	0.000593	2.7e-05	-1.13005
A_23_P403424	6.38e-20	4.93e-24	-1.14238	JMJD7-PLA2G4B	JMJD7-PLA2G4B readthrough
A_23_P362694	0.00315	0.000277	-1.14585	FDCSP	follicular dendritic cell secreted protein
A_23_P14174	6.08e-10	2.29e-12	-1.14969	TNFSF13B	tumor necrosis factor superfamily member 13b
A_23_P28246	4.79e-08	2.97e-10	-1.15484	SLC23A3	solute carrier family 23 member 3
A_23_P81717	0.00775	0.000972	-1.15582	FRMD1	FERM domain containing 1
A_23_P257993	0.00203	0.000151	-1.15705	DNASE1L3	deoxyribonuclease 1 like 3
A_24_P291658	0.00106	6.08e-05	-1.15829	ADH1A	alcohol dehydrogenase 1A (class I), alpha polypeptide
A_23_P256158	0.000257	8.71e-06	-1.15928	ADRA2C	adrenoceptor alpha 2C
A_32_P902988	0.00766	0.000958	-1.16055	MATN1	matrilin 1, cartilage matrix protein
A_23_P131074	0.00139	8.78e-05	-1.16376	THEG	theg spermatid protein
A_23_P55779	0.00691	0.000828	-1.16488	CYP2A13	cytochrome P450 family 2 subfamily A member 13
A_24_P17048	0.00199	0.000146	-1.17035	GHRHR	growth hormone releasing hormone receptor
A_23_P69768	0.00213	0.000161	-1.1734	CLDN22	claudin 22
A_23_P64828	5.87e-09	2.85e-11	-1.17574	OAS1	2'-5'-oligoadenylate synthetase 1
A_23_P373619	0.000225	7.24e-06	-1.18795	IFNL3	interferon lambda 3
A_23_P44105	5.32e-18	2.3e-21	-1.19313	LAT	linker for activation of T-cells
A_23_P354547	3e-09	1.32e-11	-1.20647
A_24_P870463	2.05e-05	3.32e-07	-1.21108
A_24_P497244	5.44e-11	1.34e-13	-1.2338	MALAT1	metastasis associated lung adenocarcinoma transcript 1 (non-protein coding)
A_23_P95790	0.000374	1.43e-05	-1.23462	ITLN1	intelectin 1
A_24_P290999	9.43e-20	1.16e-23	-1.24169	NEAT1	nuclear paraspeckle assembly transcript 1 (non-protein coding)
A_23_P259141	3.29e-06	3.89e-08	-1.2457	ZBP1	Z-DNA binding protein 1
A_32_P206308	3.28e-09	1.5e-11	-1.24766
A_24_P213134	0.00192	0.000138	-1.26256
A_23_P214080	8.72e-10	3.31e-12	-1.2633	EGR1	early growth response 1
A_23_P35564	7.97e-19	1.72e-22	-1.2656	SEC31B	SEC31 homolog B, COPII coat complex component
A_23_P204087	1.11e-06	1.08e-08	-1.26902	OAS2	2'-5'-oligoadenylate synthetase 2
A_24_P365129	0.00108	6.22e-05	-1.278	ACE	angiotensin I converting enzyme
A_23_P24004	6.33e-05	1.35e-06	-1.28505	IFIT2	interferon induced protein with tetratricopeptide repeats 2
A_23_P140490	8.82e-13	1.42e-15	-1.29906	CELF6	CUGBP, Elav-like family member 6
A_23_P23074	3.7e-10	1.26e-12	-1.30254	IFI44	interferon induced protein 44
A_24_P213590	8.62e-09	4.39e-11	-1.31146	TMEM259	transmembrane protein 259
A_23_P253542	0.000129	3.38e-06	-1.31325	SMPX	small muscle protein, X-linked
A_32_P99533	1.02e-08	5.35e-11	-1.31672
A_23_P425925	0.00381	0.000363	-1.32413	KRT222	keratin 222
A_23_P152838	0.00266	0.00022	-1.33238	CCL5	C-C motif chemokine ligand 5
A_23_P31224	1.13e-19	2.09e-23	-1.33665	PILRA	paired immunoglobin like type 2 receptor alpha
A_23_P19829	9.68e-22	2.99e-26	-1.33819	PILRB	paired immunoglobin-like type 2 receptor beta
A_24_P335305	3.39e-10	1.13e-12	-1.34598	OAS3	2'-5'-oligoadenylate synthetase 3
A_24_P403244	6.38e-20	5.91e-24	-1.34953	PILRB	paired immunoglobin-like type 2 receptor beta
A_23_P105794	2.34e-06	2.55e-08	-1.35071	EPSTI1	epithelial stromal interaction 1 (breast)
A_24_P343929	2.06e-06	2.17e-08	-1.3832	OAS2	2'-5'-oligoadenylate synthetase 2
A_23_P144126	0.0173	0.00286	-1.38413	FETUB	fetuin B
A_23_P417918	0.00351	0.000324	-1.41314
A_23_P36305	8.33e-16	6.17e-19	-1.41537	ATG16L2	autophagy related 16 like 2
A_32_P15128	1.13e-05	1.62e-07	-1.45196
A_24_P304071	2.56e-06	2.83e-08	-1.46678	IFIT2	interferon induced protein with tetratricopeptide repeats 2
A_23_P47955	9.21e-10	3.55e-12	-1.46728	OAS3	2'-5'-oligoadenylate synthetase 3
A_23_P24784	2.13e-10	6.51e-13	-1.47545	TNNI2	troponin I2, fast skeletal type
A_23_P17663	1.68e-10	4.79e-13	-1.49789	MX1	MX dynamin like GTPase 1
A_23_P110196	5.44e-07	4.93e-09	-1.50309	HERC5	HECT and RLD domain containing E3 ubiquitin protein ligase 5
A_24_P921980	0.00228	0.000177	-1.52963
A_32_P44394	2.15e-06	2.28e-08	-1.53484	AIM2	absent in melanoma 2
A_23_P35412	4.6e-09	2.17e-11	-1.61029	IFIT3	interferon induced protein with tetratricopeptide repeats 3
A_24_P715602	4.67e-05	9.08e-07	-1.61278	LINC01093	long intergenic non-protein coding RNA 1093
A_23_P4286	5.44e-11	1.33e-13	-1.61582	XAF1	XIAP associated factor 1
A_23_P384355	1.31e-07	9.41e-10	-1.62913
A_24_P557479	3.39e-10	1.12e-12	-1.6372	XAF1	XIAP associated factor 1
A_23_P4283	1.66e-11	3.73e-14	-1.64706	XAF1	XIAP associated factor 1
A_24_P60845	0.00319	0.000282	-1.65436	ACHE	acetylcholinesterase (Cartwright blood group)
A_23_P312008	8.41e-13	1.32e-15	-1.68563	CD55	CD55 molecule (Cromer blood group)
A_23_P36882	0.00769	0.000963	-1.81221	NTS	neurotensin
A_23_P819	2.74e-10	8.57e-13	-1.88443	ISG15	ISG15 ubiquitin-like modifier
A_23_P128230	4.57e-07	3.96e-09	-1.89184	NR4A1	nuclear receptor subfamily 4 group A member 1
A_24_P917810	4.13e-06	5.09e-08	-1.90726
A_23_P429998	1.44e-05	2.18e-07	-1.97402	FOSB	FosB proto-oncogene, AP-1 transcription factor subunit
A_23_P39465	8.87e-09	4.55e-11	-2.0025	BST2	bone marrow stromal cell antigen 2
A_24_P117294	5.96e-10	2.21e-12	-2.01861	MX2	MX dynamin like GTPase 2
A_23_P6263	1.76e-09	7.11e-12	-2.02847	MX2	MX dynamin like GTPase 2
A_24_P316965	3.15e-07	2.52e-09	-2.09874	RSAD2	radical S-adenosyl methionine domain containing 2
A_23_P201459	1.95e-09	8.11e-12	-2.1382	IFI6	interferon alpha inducible protein 6
A_24_P28722	1.04e-08	5.54e-11	-2.29882	RSAD2	radical S-adenosyl methionine domain containing 2
A_23_P52266	2.84e-10	9.04e-13	-2.43482	IFIT1	interferon induced protein with tetratricopeptide repeats 1
A_23_P48513	1.74e-08	9.79e-11	-2.47042	IFI27	interferon alpha inducible protein 27
A_24_P270460	5.59e-09	2.69e-11	-2.51689	IFI27	interferon alpha inducible protein 27
A_23_P45871	1.49e-10	4.18e-13	-2.56289	IFI44L	interferon induced protein 44 like
A_32_P9543	4.2e-07	3.54e-09	-2.58468	APOBEC3A	apolipoprotein B mRNA editing enzyme catalytic subunit 3A
A_23_P106194	3.77e-18	1.4e-21	-2.67289	FOS	Fos proto-oncogene, AP-1 transcription factor subunit
A_23_P139786	6.13e-11	1.59e-13	-2.71708	OASL	2'-5'-oligoadenylate synthetase like
A_24_P20607	9.2e-09	4.74e-11	-2.8694	CXCL11	C-X-C motif chemokine ligand 11
A_23_P125278	1.17e-08	6.28e-11	-3.31721	CXCL11	C-X-C motif chemokine ligand 11
A_24_P303091	2.71e-08	1.6e-10	-3.44572	CXCL10	C-X-C motif chemokine ligand 10

## Sheet: GSE147507
DDX11L1	0	0	0	0	0	0	1	0	0	0	0	0	0	0	0	0	0	0	0	0	0	0	0	0	0	0	0	0	0	0	0	0	0	1	1	0	0	0	0	0	0	0	0	0	0	1	0	0	0
WASH7P	29	24	23	68	43	33	184	128	15	12	64	53	37	37	4	22	25	60	84	68	17	21	57	58	53	89	0	11	7	34	19	44	65	79	48	51	43	3	3	38	47	65	1	2	4	47	32	41	18
FAM138A	0	0	0	0	0	0	0	0	0	0	0	0	0	0	0	0	0	0	0	0	0	0	0	0	0	0	0	0	0	0	0	0	0	0	0	0	0	0	0	0	0	0	0	0	0	0	0	0	0
FAM138F	0	0	0	0	0	0	0	0	0	0	0	0	0	0	0	0	0	0	0	0	0	0	0	0	0	0	0	0	0	0	0	0	0	0	0	0	0	0	0	0	0	0	0	0	0	0	0	0	0
OR4F5	0	0	0	0	0	0	0	0	0	0	0	0	0	0	0	0	0	0	0	0	0	0	0	0	0	0	0	0	0	0	0	0	0	0	0	0	0	0	0	0	0	0	0	0	0	0	0	0	0
LOC729737	112	119	113	11	3	6	108	95	1	5	7	14	11	13	2	18	65	184	435	4	3	5	58	51	44	93	1	2	2	127	84	270	8	10	10	37	11	0	2	1	13	4	9	2	1	271	137	265	13
LOC100132287	0	0	0	0	0	0	0	0	0	0	0	0	0	0	0	0	0	0	0	0	0	0	0	0	0	0	0	0	0	0	0	0	0	0	0	0	0	0	0	0	0	0	0	0	0	0	0	0	0
LOC100132062	0	0	0	0	0	0	0	0	0	0	0	0	0	0	0	0	0	0	0	0	0	0	0	0	0	0	0	0	0	0	0	0	0	0	0	0	0	0	0	0	0	0	0	0	0	0	0	0	0
LOC100133331	19	21	36	54	23	20	127	93	16	14	49	51	54	26	2	19	4	14	30	9	10	24	8	6	12	10	2	10	5	16	23	54	45	42	36	25	16	10	3	31	44	99	9	3	6	14	12	23	31
OR4F29	0	0	0	0	0	0	0	0	0	0	0	0	0	0	0	0	0	0	0	0	0	0	0	0	0	0	0	0	0	0	0	0	0	0	0	0	0	0	0	0	0	0	0	0	0	0	0	0	0
OR4F16	0	0	0	0	0	0	0	0	0	0	0	0	0	0	0	0	0	0	0	0	0	0	0	0	0	0	0	0	0	0	0	0	0	0	0	0	0	0	0	0	0	0	0	0	0	0	0	0	0
OR4F3	0	0	0	0	0	0	0	0	0	0	0	0	0	0	0	0	0	0	0	0	0	0	0	0	0	0	0	0	0	0	0	0	0	0	0	0	0	0	0	0	0	0	0	0	0	0	0	0	0
LOC100288069	13	17	27	23	18	5	7	12	5	15	18	14	21	8	2	9	0	1	15	0	6	8	3	0	0	1	1	4	4	19	9	50	30	17	14	4	3	8	3	16	25	44	4	1	1	11	4	9	6
LINC00115	9	12	26	29	15	2	38	24	5	11	15	10	16	44	3	28	4	12	22	0	13	10	2	2	0	1	2	14	8	12	7	28	17	13	16	13	6	4	0	2	12	16	105	24	15	12	1	10	8
FAM41C	0	0	1	0	0	0	0	0	0	0	0	0	0	0	0	0	0	1	0	0	0	0	0	0	0	0	0	1	0	0	1	0	0	0	0	0	1	1	0	0	0	0	0	1	0	0	0	0	0
SAMD11	11	20	8	1013	517	456	2236	1470	112	218	2442	2042	1897	341	29	234	0	8	10	935	420	687	0	1	1	5	4	37	38	26	10	63	1052	961	720	466	264	22	30	712	694	1312	171	56	52	3	5	6	150
NOC2L	1773	1757	2554	2188	1260	1070	2376	1627	437	851	2401	2220	2148	2072	191	1566	916	2198	4414	1073	807	1152	1002	995	1276	2402	159	802	592	1915	1605	5162	2375	2360	1854	634	515	534	188	1101	992	2012	368	114	84	1302	616	1325	1392
KLHL17	110	133	131	317	218	155	662	442	56	85	417	377	332	199	20	167	69	163	244	53	68	106	129	133	233	391	8	47	37	168	78	242	401	389	329	265	146	34	19	136	181	379	71	24	17	106	61	111	89
PLEKHN1	170	172	254	114	73	59	177	132	18	35	112	104	99	61	9	41	45	109	227	23	28	29	179	172	194	337	6	9	11	186	120	403	141	111	97	116	56	8	1	71	79	168	14	9	10	136	58	156	88
HES4	26	52	57	307	173	123	292	271	38	64	164	155	144	104	8	121	228	546	852	57	26	32	106	122	259	384	4	35	34	30	17	64	320	291	241	399	162	25	9	116	139	187	43	37	26	361	347	844	140
ISG15	45	52	51	90	42	37	959	698	39	123	87	47	57	84	7	63	518	1387	2423	76	20	25	69	70	129	205	12	93	46	82	45	211	1418	1242	877	5801	4196	58	13	76	47	110	30	6	4	7505	3781	8180	1626
AGRN	2887	3576	4140	9042	4665	3502	10407	7947	1079	1791	6380	6268	6012	8375	837	6372	6532	14378	31240	582	1655	2487	3691	3508	3540	6865	522	2908	2134	3682	2053	6988	9511	8947	7039	4762	2788	411	306	5993	6748	10831	1574	600	353	14808	8116	18996	4909
RNF223	7	4	9	1	2	0	1	1	0	0	0	0	0	0	0	1	35	56	116	0	0	0	11	19	21	41	0	1	1	6	4	4	1	0	0	1	0	0	1	0	0	0	0	0	0	106	65	158	1
C1orf159	47	76	77	363	183	144	452	314	39	88	323	255	251	175	19	143	137	344	737	188	93	126	121	144	147	278	4	62	61	83	34	120	355	377	287	202	111	38	26	98	104	186	32	11	14	160	106	238	125
MIR200B	0	0	0	0	0	0	0	0	0	0	0	0	0	0	0	0	0	0	2	0	0	0	0	0	0	1	0	0	0	0	0	0	0	0	0	0	0	0	0	0	0	1	0	0	0	2	1	2	0
MIR200A	0	1	3	0	0	0	0	0	0	0	0	0	0	0	0	0	3	9	2	0	0	0	2	0	0	3	0	0	0	3	1	3	0	0	0	1	0	0	0	0	0	0	0	0	0	1	0	1	0
MIR429	3	9	14	0	0	1	2	3	0	0	0	1	0	0	0	0	1	10	4	0	0	0	1	1	1	2	0	0	0	3	2	11	0	0	0	1	0	0	0	1	4	1	0	1	1	9	1	3	0
TTLL10	0	0	0	0	0	0	0	0	0	0	0	0	0	0	0	0	1	3	3	0	0	0	0	0	0	0	0	0	0	0	0	1	0	0	0	0	0	0	0	0	0	0	0	0	0	1	1	4	0
TNFRSF18	0	0	1	0	0	0	1	0	0	0	0	0	0	0	0	0	5	11	6	0	0	0	2	3	4	4	0	1	0	1	0	3	0	0	0	0	0	0	0	0	0	0	0	0	0	6	8	10	0
TNFRSF4	0	0	0	3	0	0	3	0	0	0	3	0	1	1	0	1	0	2	2	0	0	0	0	0	0	0	1	0	0	1	0	1	0	1	0	2	2	0	0	0	0	1	1	0	0	1	0	1	0
SDF4	1530	1572	1975	2752	1644	1366	4247	2986	418	860	2686	2371	2634	2368	226	1738	2506	5599	10424	1117	745	1257	934	993	1488	2306	283	1251	884	1840	1232	3914	3066	3048	2305	1446	866	720	235	1586	1587	2997	421	171	119	3589	2122	4390	1561
B3GALT6	202	167	222	822	437	375	865	578	110	258	618	546	487	456	52	374	243	602	1172	288	159	193	100	121	238	406	33	190	148	130	146	397	815	841	622	245	191	88	41	379	354	711	135	54	40	288	211	447	196
UBE2J2	275	273	418	685	376	315	851	684	129	238	620	546	496	565	43	354	251	563	1074	217	159	240	279	303	415	783	51	210	174	277	230	637	830	722	593	292	194	129	60	427	451	891	163	43	23	402	259	468	352
SCNN1D	7	10	20	139	84	43	531	315	24	37	105	90	104	90	7	53	13	14	48	31	12	31	12	7	10	12	1	8	8	12	8	9	122	84	83	170	86	11	6	67	75	168	13	7	0	16	10	28	19
ACAP3	305	339	470	645	355	284	1411	1045	100	180	524	487	461	711	62	560	189	568	1129	156	118	198	423	415	608	1095	33	156	118	357	251	744	575	561	434	364	233	48	25	139	230	400	145	46	21	278	157	362	134
PUSL1	75	81	131	274	158	150	314	240	33	82	208	185	200	247	21	169	197	490	873	157	75	71	156	167	198	349	16	88	53	108	55	172	272	276	203	99	57	11	18	126	109	181	40	20	16	262	126	339	74
TAS1R3	8	1	4	10	7	8	15	15	0	4	10	9	12	5	0	3	0	1	3	0	1	2	12	7	10	21	0	2	0	0	0	1	15	16	16	6	4	3	0	2	5	1	3	0	0	0	0	2	4
DVL1	544	657	762	1693	918	720	1809	1218	250	450	1236	1123	1101	1211	139	946	673	1737	3524	187	373	577	971	972	1173	2122	68	331	246	738	395	1358	1757	1614	1331	696	384	209	123	1057	1081	2023	328	115	68	1447	709	1644	975
MXRA8	18	21	12	124	56	49	249	248	12	24	0	0	0	8	0	5	1	11	26	1	0	0	41	36	52	103	3	14	14	27	17	28	75	73	54	77	35	1	2	1	2	6	9	3	1	6	13	11	0
AURKAIP1	401	397	630	1856	1067	818	2655	1700	285	521	1747	1316	1295	1235	82	771	732	2021	3380	1508	452	600	641	714	1047	1759	108	499	458	517	358	1139	1967	1902	1454	711	521	133	85	557	549	1025	202	86	55	736	446	956	643
CCNL2	926	1115	1358	1752	1155	837	5355	4029	325	591	1940	1794	1467	3038	228	2068	352	793	1731	191	394	551	663	723	1046	1825	170	857	775	1049	866	2555	2277	2049	1772	1806	1043	282	114	1838	1857	4048	629	158	111	740	437	791	687
LOC148413	192	140	238	296	175	139	440	356	64	129	352	290	266	324	32	232	143	270	629	49	75	137	68	65	96	133	47	146	166	157	124	418	294	304	245	123	74	40	23	258	242	468	99	29	22	219	94	256	102
MRPL20	663	541	738	1225	719	544	1374	966	251	559	1244	1054	1007	1385	116	903	507	1114	2108	769	346	502	348	387	617	1033	132	616	511	513	491	1799	1651	1431	1012	409	292	508	180	764	679	1402	269	60	61	649	308	602	595
ANKRD65	242	298	375	0	0	0	3	1	1	0	0	0	1	1	0	6	0	0	7	0	0	0	96	104	156	239	0	1	0	256	174	594	1	0	0	0	0	0	0	0	0	0	0	2	0	0	0	3	0
TMEM88B	0	0	0	0	1	1	0	0	0	0	0	0	0	0	0	0	0	0	0	0	0	0	1	0	0	0	0	0	0	0	0	1	1	0	0	1	0	0	0	0	0	0	0	0	0	0	0	0	0
VWA1	217	270	319	490	247	240	1087	777	94	212	521	468	425	75	8	67	1295	3195	6371	229	131	213	380	447	336	644	24	133	99	359	163	522	674	598	439	347	218	31	30	181	262	456	31	7	8	987	709	1533	111
ATAD3C	11	9	20	0	0	0	0	0	0	0	1	0	0	0	0	0	4	10	24	0	0	0	7	4	12	15	0	0	1	12	11	46	0	0	0	0	0	0	0	0	0	0	0	0	0	11	4	9	0
ATAD3B	154	223	292	38	29	28	70	39	4	5	44	32	41	43	2	29	202	488	988	33	5	5	343	371	537	930	3	20	11	287	172	508	40	45	34	10	12	1	2	18	14	20	8	1	1	290	140	319	22
ATAD3A	170	202	284	834	471	368	623	362	136	208	655	605	601	547	51	365	434	1011	1866	396	204	266	354	386	439	763	36	219	153	274	181	569	822	806	657	152	137	109	48	310	218	484	103	29	26	507	206	603	371
TMEM240	1	1	0	6	2	2	14	9	0	2	9	4	6	3	1	0	6	18	26	0	1	1	1	1	1	2	0	2	2	0	1	0	5	6	3	3	3	0	0	1	2	10	1	0	0	6	7	13	0
SSU72	1078	886	1344	2010	1158	895	2164	1629	393	835	1927	1828	1527	976	76	765	769	1675	3393	713	535	831	664	677	996	1765	213	890	699	827	851	2692	2510	2078	1670	757	420	1512	239	1502	1552	3028	235	78	71	1239	666	1404	1162
MIB2	104	133	156	481	230	221	1159	739	68	132	437	398	398	715	61	617	153	481	803	147	84	142	246	235	321	518	26	122	61	147	59	237	483	422	384	357	171	57	28	203	201	420	176	98	41	170	119	293	109
MMP23B	0	0	0	0	1	0	0	0	0	0	0	0	0	2	0	0	0	0	0	0	0	0	0	0	0	0	0	0	0	0	0	0	0	0	0	0	0	0	0	0	0	0	0	0	0	0	0	0	0
MMP23A	0	0	0	2	1	0	1	0	0	0	0	0	0	0	0	0	0	0	0	0	0	0	0	0	0	0	0	0	0	0	0	0	0	0	0	0	0	0	0	0	0	0	0	0	0	0	0	0	1
CDK11B	229	227	256	498	322	236	549	376	83	156	482	444	409	344	31	224	167	305	621	91	138	207	149	179	181	318	34	202	146	243	210	695	519	565	389	180	110	113	45	278	252	562	100	29	16	273	154	290	298
SLC35E2B	376	375	497	843	508	382	718	645	165	320	693	679	617	725	67	480	298	472	1306	8	196	365	146	133	163	271	61	270	261	357	304	889	925	809	612	199	107	137	31	844	799	1339	114	31	43	616	348	622	301
CDK11A	97	82	125	245	155	127	475	307	26	87	231	262	205	228	18	150	57	87	212	30	45	88	66	48	79	138	23	95	52	113	98	295	253	280	219	141	89	54	12	171	160	276	83	18	15	129	55	115	120
NADK	388	334	555	1055	678	462	993	843	177	336	853	781	675	688	72	500	401	869	1833	94	227	364	346	340	413	803	68	371	303	396	319	976	1110	1041	832	342	235	277	98	762	676	1250	124	44	30	1114	539	1278	451
GNB1	8479	6953	11155	6351	3562	2732	2647	2036	1106	2380	6329	5889	5305	3699	306	2668	2374	4307	10122	815	1825	3052	2615	2413	2743	5574	454	2358	1955	7486	7295	20663	7816	7161	5134	1226	774	2916	522	6074	6078	11507	625	228	172	5748	2941	5752	5554
CALML6	4	6	7	13	3	5	46	24	0	1	6	3	7	18	1	11	0	1	1	4	1	2	0	1	1	2	1	7	5	10	4	12	8	9	5	18	8	0	1	7	10	31	2	0	1	0	3	2	1
TMEM52	0	6	1	6	0	1	11	16	1	2	8	6	6	2	1	11	3	18	47	1	3	3	1	2	3	3	3	6	6	4	2	10	7	18	6	2	3	3	3	6	9	21	1	0	1	5	2	3	2
GABRD	0	0	0	15	6	6	31	26	4	1	7	2	8	5	0	9	0	0	0	1	3	2	0	0	0	0	1	9	3	0	0	0	10	11	9	7	6	4	0	0	3	2	2	0	0	0	0	0	2
PRKCZ	638	552	894	254	157	123	240	166	46	129	356	360	272	444	37	354	143	300	561	153	90	132	156	138	156	308	23	113	110	579	478	1510	322	249	225	75	52	95	19	313	376	729	60	19	15	218	133	247	157
SKI	633	633	850	937	438	422	874	665	166	294	714	823	740	313	31	215	233	415	1053	26	232	395	409	473	513	968	26	191	152	763	529	1669	1048	890	691	322	137	240	71	625	717	1363	152	39	36	454	244	486	315
MORN1	23	25	46	127	75	78	168	108	22	48	135	91	109	92	13	82	26	62	182	20	33	56	16	8	24	29	8	47	47	39	26	75	142	155	93	47	20	17	5	84	85	149	16	10	7	41	29	66	34
LOC100129534	28	16	24	65	36	24	70	83	15	20	56	50	49	33	4	8	9	18	38	11	11	25	4	1	2	9	1	20	22	20	12	46	39	34	30	20	8	8	1	20	31	39	6	0	1	8	6	16	8
RER1	1495	1370	2065	2120	1287	981	2727	2029	359	665	1957	1790	1648	1553	160	1076	1012	2126	4139	656	558	780	764	800	1178	2417	202	956	771	1319	1336	3642	2495	2125	1649	896	563	714	210	2025	1839	3246	242	96	71	1303	770	1516	1053
PEX10	157	144	244	401	250	199	283	237	59	116	591	521	455	464	46	335	168	387	810	150	136	230	84	97	127	236	24	82	66	114	94	354	411	377	296	80	52	56	30	384	439	775	89	32	35	282	168	400	149
PLCH2	948	1118	1290	13	5	5	4	4	0	9	13	4	11	3	0	3	5	16	28	3	3	5	972	919	1234	2323	1	1	1	1204	852	2578	8	11	9	3	5	7	1	3	9	11	2	1	1	46	14	58	2
PANK4	242	239	329	362	193	162	426	281	56	135	329	270	265	195	19	139	115	251	609	42	97	144	172	179	201	378	21	73	65	301	232	664	393	369	308	136	76	85	23	255	216	382	72	17	6	265	120	315	157
HES5	2	2	2	0	0	0	0	0	0	0	0	0	0	0	0	0	0	0	0	0	0	0	20	13	36	76	0	0	0	0	3	2	0	0	0	0	0	0	0	0	0	0	0	0	0	0	0	0	0
TNFRSF14	80	104	105	1	1	0	11	16	0	1	1	3	0	0	0	0	88	179	383	0	0	0	26	28	60	82	0	4	1	75	57	154	0	1	0	4	7	0	0	2	0	4	0	0	0	328	179	390	2
FAM213B	379	297	519	485	290	239	359	324	81	154	476	459	507	185	18	141	394	1006	2108	151	147	251	0	0	0	0	37	133	101	353	268	953	566	530	397	113	57	56	24	319	337	603	22	7	12	487	295	748	138
MMEL1	1	2	0	2	1	0	4	5	0	0	2	0	0	0	0	0	9	29	67	0	0	0	0	1	0	0	0	0	1	1	4	3	1	0	0	0	0	0	0	1	0	2	0	0	0	18	23	33	0
TTC34	0	0	0	1	1	1	2	1	0	1	1	0	0	1	0	0	0	0	0	0	0	0	1	0	0	0	0	1	1	0	0	0	0	3	0	0	1	0	0	0	1	2	0	0	0	0	0	1	0
ACTRT2	0	0	0	0	0	0	0	0	0	0	0	0	0	0	0	0	0	0	0	0	0	0	0	0	0	0	0	0	0	0	0	0	0	0	0	0	0	0	0	0	0	0	0	0	0	0	0	0	0
PRDM16	35	25	39	11	9	3	22	12	8	14	17	24	9	3	1	3	0	0	0	2	4	5	15	10	10	20	1	3	3	27	19	56	20	16	8	2	3	12	2	30	44	69	9	1	3	0	1	3	23
MIR4251	0	0	0	0	0	0	0	0	0	0	0	0	0	0	0	0	0	0	0	0	0	0	0	0	0	0	0	0	0	0	0	0	0	0	0	0	0	0	0	0	0	0	0	0	0	0	0	0	0
ARHGEF16	210	232	281	198	86	93	294	219	35	54	152	133	116	44	6	27	192	633	1170	53	44	79	185	176	247	433	12	43	31	288	186	538	209	180	144	96	83	39	13	127	189	265	3	3	3	461	249	510	98
MEGF6	57	76	80	544	266	219	1357	1125	60	125	267	234	238	65	10	54	218	559	1179	17	34	58	13	16	25	32	23	121	96	52	43	122	464	431	306	584	360	45	12	248	395	565	3	3	2	350	216	394	39
MIR551A	0	0	0	0	0	0	0	0	0	0	0	0	0	0	0	0	0	0	0	0	0	0	0	0	0	0	0	0	0	0	0	0	0	0	0	0	0	0	0	0	0	0	0	0	0	0	0	0	0
TPRG1L	689	629	1158	641	400	291	348	314	123	157	549	453	400	949	87	703	324	644	1398	175	157	249	400	411	720	1402	99	472	423	622	665	2019	679	548	461	113	107	129	29	456	545	875	157	37	45	568	311	587	454
WRAP73	125	121	165	492	283	248	582	419	96	209	483	394	364	264	20	203	119	260	537	75	127	155	97	139	149	319	24	161	97	142	102	275	568	526	437	177	169	100	50	310	269	546	112	32	18	217	124	260	191
TP73	12	17	10	20	10	1	13	4	2	3	5	5	14	5	0	5	17	34	50	0	1	9	5	2	3	4	2	28	25	8	3	16	13	15	10	2	3	0	2	2	6	4	6	0	1	12	9	27	2
TP73-AS1	159	195	231	497	293	209	524	412	96	149	528	464	441	205	13	131	92	194	508	35	144	209	87	76	61	134	23	128	94	173	153	433	528	493	445	143	109	87	27	362	361	688	62	15	10	242	92	261	183
CCDC27	0	0	0	1	0	1	0	1	0	0	0	0	0	0	0	0	0	0	0	0	0	0	0	0	0	0	0	0	0	0	0	0	1	1	0	0	0	0	0	0	0	0	0	0	0	0	0	0	0
SMIM1	4	5	6	15	7	6	38	14	3	2	11	14	13	4	0	2	17	41	52	7	3	6	6	9	9	9	0	5	0	7	10	11	21	14	13	25	17	0	3	9	12	21	1	2	1	20	18	24	1
LRRC47	494	450	686	1086	594	469	787	631	254	391	1028	1020	959	1229	103	910	400	753	1656	169	264	428	314	306	389	764	105	535	419	523	432	1346	1158	1140	873	229	151	270	106	716	692	1223	196	82	50	685	342	740	539
CEP104	594	462	806	702	390	323	480	447	140	280	544	493	462	401	40	351	136	267	690	75	153	277	244	195	224	456	59	298	236	488	510	1397	751	675	510	149	74	297	67	569	626	1068	83	18	21	367	189	344	407
DFFB	80	58	116	126	80	59	152	113	20	34	114	81	87	40	8	41	37	82	174	14	22	44	49	32	47	101	7	29	17	86	83	223	148	129	74	42	30	20	7	67	76	159	8	1	0	69	33	79	50
C1orf174	178	169	249	474	247	218	432	377	109	206	417	422	362	237	31	175	192	306	589	32	97	167	89	111	148	288	19	113	97	153	178	465	632	523	400	148	88	263	57	284	320	729	36	18	10	251	133	197	232
AJAP1	13	24	29	0	0	0	3	1	0	0	0	0	1	0	0	0	0	0	0	0	0	0	8	8	12	36	0	0	0	14	6	22	0	0	0	0	0	2	0	0	0	0	0	0	0	0	0	0	0
MIR4689	0	0	0	0	0	0	0	0	0	0	0	0	0	0	0	0	0	0	0	0	0	0	0	0	0	0	0	0	0	0	0	0	1	0	0	0	0	0	0	0	0	0	0	0	0	1	0	0	0
NPHP4	109	85	140	312	208	153	308	204	53	102	302	271	255	130	7	99	71	111	272	21	67	102	83	78	77	197	13	66	56	124	98	314	340	339	263	53	50	56	38	150	209	296	22	5	7	66	45	99	85
KCNAB2	31	32	55	722	409	346	864	549	205	378	692	659	590	548	56	426	80	112	287	121	218	346	0	1	1	2	71	236	212	34	27	86	712	632	463	173	117	256	64	372	327	732	92	33	16	84	47	86	378
CHD5	1	3	6	46	33	32	9	10	11	17	62	53	51	2	1	4	0	2	5	4	7	9	0	0	0	3	0	4	5	0	5	6	78	69	55	3	5	8	6	38	73	107	3	0	0	5	1	7	13
RPL22	4150	3374	6186	5578	3085	2539	9852	7919	1159	3120	4272	3809	4939	4924	387	2795	1969	3913	7635	1581	1309	2392	1877	2102	2287	4239	581	2553	2226	3925	4344	11992	8870	7026	4349	2551	2088	2315	564	4708	5019	9731	1065	284	302	4081	2623	3850	2616
RNF207	198	267	276	586	368	243	1472	1150	81	125	425	409	388	557	56	388	81	208	407	27	72	109	53	62	94	168	20	103	98	261	248	746	605	525	488	553	368	94	34	302	337	703	107	31	25	230	132	286	140
ICMT	1369	1213	1963	3482	1942	1471	1878	1718	516	932	2674	2510	2360	1118	101	687	1104	2004	4751	387	819	1482	697	721	830	1633	208	1093	807	1107	1153	3580	3979	3274	2660	322	246	927	231	1319	1348	2446	217	61	56	1299	695	1317	1056
HES3	0	0	0	0	0	0	0	0	0	0	0	0	0	0	0	0	0	0	0	0	0	0	0	0	0	1	1	0	0	0	0	0	0	0	0	0	0	0	0	0	0	0	0	0	0	0	0	0	0
GPR153	738	697	1019	58	38	24	158	111	13	23	61	61	69	34	2	15	68	172	474	10	13	22	601	588	678	1417	4	42	28	870	678	2044	69	60	52	53	53	10	3	40	52	100	8	0	0	121	86	148	23
ACOT7	675	588	963	1578	859	624	952	753	235	402	1401	1232	1081	861	91	626	633	1253	2485	433	403	599	1160	1211	1399	2587	104	659	485	794	494	2017	1751	1613	1230	422	343	478	160	903	787	1549	108	51	18	734	329	833	1246
HES2	4768	3998	6323	26	20	9	81	57	7	15	18	15	22	104	15	90	2	2	8	6	2	10	1759	1764	1779	3464	9	54	43	3999	3981	11630	31	26	21	25	20	8	0	12	31	53	51	7	7	8	9	9	5
ESPN	515	638	836	0	0	0	18	12	2	0	1	0	0	0	0	0	15	44	89	2	0	0	298	250	413	809	2	3	1	485	339	1016	2	2	0	3	2	0	0	0	3	6	0	0	0	34	22	50	1
MIR4252	0	0	0	0	0	0	0	0	0	0	0	0	0	0	0	0	0	0	0	0	0	0	0	0	0	0	0	0	0	0	0	0	0	0	0	0	0	0	0	0	0	0	0	0	0	0	0	0	0
TNFRSF25	157	233	279	41	19	12	116	93	4	10	38	21	24	6	0	6	15	18	50	5	9	6	210	187	270	415	1	4	5	211	148	531	34	21	34	81	31	5	7	24	33	86	2	0	1	69	33	73	19
PLEKHG5	922	1100	1485	107	62	43	203	172	19	32	115	116	101	22	2	29	26	38	93	7	26	33	669	592	735	1445	5	22	36	1197	798	2632	142	130	94	86	65	16	11	136	193	282	10	3	2	119	68	177	74
NOL9	314	255	396	461	288	197	425	384	133	207	434	394	438	426	48	323	118	268	601	34	117	289	102	120	174	397	42	204	194	227	264	646	588	428	344	107	94	192	49	317	341	576	139	33	33	282	184	291	344
TAS1R1	0	0	0	0	1	0	0	0	0	0	0	0	1	2	0	1	0	0	0	0	0	0	0	0	0	0	0	0	0	1	0	1	0	0	0	0	0	0	0	0	1	0	0	0	0	0	2	0	0
ZBTB48	127	164	210	221	114	98	430	359	29	72	192	188	167	110	12	88	55	152	277	118	48	87	69	77	132	211	14	79	52	159	121	396	230	235	188	115	85	37	19	156	124	286	69	26	20	194	105	225	71
KLHL21	482	428	871	820	458	352	459	371	129	156	444	370	407	795	81	625	264	446	1094	15	126	222	498	553	484	989	55	325	238	531	462	1241	663	593	461	71	53	53	43	398	331	667	146	40	32	729	322	813	565
PHF13	216	176	307	400	232	180	332	342	51	103	378	355	313	177	18	110	192	353	839	22	98	156	79	73	101	210	37	182	142	158	203	482	518	419	349	121	76	65	28	392	386	616	53	17	15	392	220	478	154
THAP3	70	80	125	220	143	124	362	278	61	105	292	282	212	192	17	171	55	178	313	94	86	116	48	48	84	114	19	89	73	110	76	226	231	266	191	107	91	67	22	225	196	402	75	17	23	259	140	258	118
DNAJC11	942	760	1497	826	477	440	408	382	177	336	1350	1260	1207	1527	154	1076	381	834	1659	327	402	579	387	313	368	727	116	478	427	979	882	2847	978	965	743	127	102	340	73	835	892	1768	282	70	74	711	310	723	780
CAMTA1	200	196	382	423	225	190	655	505	84	160	501	476	460	394	40	301	383	718	1428	197	145	210	127	127	186	319	56	253	196	190	192	620	638	491	371	331	110	226	58	410	445	805	79	20	22	690	361	672	256
VAMP3	1627	1366	2414	1560	858	625	1262	1225	310	701	1419	1470	1278	1626	135	959	657	1155	2576	215	402	695	745	733	1128	2305	258	1284	960	1279	1405	3847	2396	1520	1160	464	230	975	237	1444	1934	3418	298	69	84	1425	789	1372	910
PER3	135	123	216	112	61	54	72	95	53	73	89	103	87	75	7	44	34	48	149	2	43	54	47	43	32	47	14	77	68	95	84	224	129	84	65	17	6	99	20	124	122	208	116	23	21	57	21	62	30
UTS2	0	0	0	0	0	0	0	0	0	0	0	0	0	2	0	0	0	0	0	0	0	0	0	0	0	0	0	1	1	0	0	0	0	0	0	0	0	0	0	0	1	0	0	0	0	0	0	0	0
TNFRSF9	7	10	8	85	35	22	37	34	6	20	44	51	43	439	39	286	10	1	11	8	11	10	5	1	1	0	31	122	90	6	5	14	97	75	64	24	14	11	9	214	243	389	104	21	23	194	121	215	397
PARK7	1780	1560	2592	4414	2450	1778	5464	3828	862	1819	4183	3424	3016	3714	273	2288	1193	2602	5335	1323	944	1605	1026	1165	1689	2869	397	2123	1860	1525	1676	4824	5614	4557	3275	1537	1063	2167	446	3133	2904	5518	470	155	140	1598	812	1612	1826
ERRFI1	1721	1520	2666	2096	1182	898	2622	3369	360	786	1752	1737	1614	3612	361	2172	515	766	2077	31	363	821	576	602	962	2004	939	3959	3379	1732	2079	5900	3397	2546	1906	1456	771	828	214	3340	8231	5834	942	264	278	2845	1973	2985	1254
SLC45A1	4	3	3	106	57	50	530	324	19	31	101	86	68	78	4	72	10	14	27	27	31	52	1	1	0	0	16	93	58	5	0	10	131	145	114	251	162	9	4	71	173	217	22	5	4	17	14	22	16
RERE	1095	1046	1396	1361	714	605	1134	998	203	401	1308	1339	1173	693	62	400	244	390	1231	60	359	609	341	307	233	479	70	358	267	998	898	2542	1284	1173	986	388	252	343	122	1329	1240	2245	163	66	32	733	396	809	555
ENO1	28567	23784	37550	66913	38709	27759	46519	38273	10838	19577	52771	47607	43086	45338	4000	30454	12082	23806	52421	20109	15595	25504	14461	14429	16290	29016	7642	36237	31254	29550	25434	77130	79137	72971	49545	15846	13668	16027	5951	31533	40905	68970	5791	1858	1682	14828	7543	15944	33997
ENO1-AS1	0	0	4	3	1	0	4	3	0	1	3	1	3	5	1	1	3	0	8	2	2	0	0	2	1	5	0	1	0	0	1	0	0	0	3	1	0	1	0	0	1	7	1	0	3	2	0	0	3
CA6	0	0	0	0	0	0	0	0	0	0	0	0	0	0	0	0	2	2	4	0	0	0	0	0	0	1	0	0	0	1	1	2	0	0	0	0	2	0	0	0	0	0	0	0	0	1	0	1	0
SLC2A7	0	0	0	2	1	0	2	3	0	1	0	2	0	0	0	0	0	0	3	1	0	0	0	0	0	0	0	0	1	0	0	0	1	0	1	0	0	0	0	0	2	2	0	0	0	0	0	0	0
SLC2A5	18	19	21	5	1	1	2	5	1	1	4	2	5	10	1	14	9	13	28	1	2	2	5	4	3	10	1	15	9	9	12	24	3	1	3	8	2	0	0	0	1	1	7	2	3	6	0	7	1
GPR157	56	63	95	76	44	31	25	31	16	22	46	45	45	49	4	40	2	8	38	2	11	25	23	15	38	52	3	22	19	108	43	153	91	81	64	15	9	7	9	39	54	49	18	2	7	22	18	19	22
MIR34A	1	2	6	5	4	4	10	5	0	2	5	4	5	6	0	3	0	0	1	0	1	2	0	0	0	0	0	2	1	4	2	3	10	5	3	4	1	0	0	0	1	3	1	2	0	2	0	0	2
H6PD	434	427	620	1597	839	641	1288	1181	242	417	1382	1431	1236	463	33	350	278	499	1492	118	306	600	163	151	216	380	114	546	443	370	342	997	1674	1512	1244	390	274	197	69	2099	2222	3321	105	29	24	805	421	903	606
SPSB1	678	692	1030	932	531	405	712	600	130	268	962	1009	872	628	51	521	63	109	308	125	249	409	158	164	142	323	51	267	215	591	559	1633	975	992	734	333	242	123	33	1058	1073	2157	197	74	43	478	226	507	841
SLC25A33	13	16	31	162	83	55	108	95	30	60	100	97	69	69	7	54	86	119	271	17	24	39	22	34	42	82	8	50	45	23	17	53	205	161	150	35	16	99	20	137	93	205	37	10	8	148	77	134	69
TMEM201	63	64	82	417	202	148	287	209	47	118	339	320	302	120	11	96	155	306	658	53	105	171	97	81	64	132	10	103	45	73	55	148	396	374	354	77	51	52	21	142	145	227	20	6	2	169	80	189	109
PIK3CD	317	262	479	351	214	162	325	236	69	137	354	293	286	276	27	165	53	71	173	25	81	146	205	166	213	420	18	97	72	347	314	944	407	409	321	99	80	82	39	522	668	1048	46	8	15	162	74	153	344
CLSTN1	8324	7861	11675	3507	2042	1572	3244	2242	630	1194	3623	3642	3131	3776	331	2823	1664	3000	7477	263	859	1718	3513	3445	2893	6045	503	2277	1793	7746	6743	19880	4161	3596	2795	858	662	852	283	3454	3985	6940	593	191	147	3401	1746	3817	2716
CTNNBIP1	409	344	585	242	162	95	233	215	53	76	289	273	200	79	6	84	162	343	701	47	45	65	423	475	614	1177	14	116	67	307	276	960	342	262	192	53	47	37	21	213	240	403	12	3	2	219	121	273	95
LZIC	375	297	556	499	238	187	190	179	97	174	383	373	393	348	31	202	133	204	498	54	102	205	171	219	360	693	37	204	163	251	319	935	697	525	349	87	32	182	41	509	528	833	62	14	26	282	144	256	243
NMNAT1	393	351	629	142	83	62	132	143	25	80	106	115	115	293	25	203	59	104	212	19	37	63	111	111	208	393	28	177	112	378	398	1212	212	136	121	31	21	52	11	165	151	306	45	13	10	108	64	119	101
RBP7	4	5	21	31	17	5	3	6	0	1	32	29	34	6	0	2	13	19	36	19	6	9	4	6	6	13	1	6	6	11	13	29	52	65	31	4	1	5	1	54	64	147	0	0	0	27	16	58	11
UBE4B	1043	960	1512	1107	590	466	740	692	280	494	1107	1149	993	332	23	163	211	418	1214	59	282	553	336	311	344	716	57	248	173	798	872	2300	1189	971	824	210	122	556	126	873	1073	1698	81	25	28	447	189	426	603
KIF1B	1414	1241	2051	1286	668	587	815	772	331	599	1064	1039	896	1143	94	636	195	290	913	34	308	539	370	379	372	752	179	920	631	1152	1249	3612	1636	1239	1014	200	170	597	182	1489	1783	2451	206	68	70	496	245	505	1139
PGD	3237	2446	3899	35948	21109	15266	30531	24921	7734	14719	39492	36297	33830	23653	2061	16409	1867	3457	7703	7884	10225	18405	856	899	1015	1802	2928	12460	10436	2659	2946	8597	43364	38277	27327	10585	7771	12681	2942	24964	24056	45921	3648	1112	1038	2734	1406	2885	15498
CORT	1	0	0	6	5	3	28	11	3	1	1	2	2	0	0	1	0	3	1	1	0	1	1	1	1	5	1	1	3	0	0	0	5	5	3	1	1	1	0	1	0	0	1	0	0	0	0	1	3
DFFA	939	711	1277	670	362	286	513	450	152	284	637	600	624	637	65	377	239	512	1263	106	183	332	328	268	427	762	50	253	216	840	745	2146	856	727	623	131	104	335	58	445	460	907	116	21	37	501	200	542	466
PEX14	358	415	563	301	170	132	467	287	77	137	358	327	354	298	40	257	111	301	624	77	92	166	218	209	211	410	39	137	127	446	299	923	390	336	245	109	81	56	20	207	266	459	81	24	12	247	125	299	196
CASZ1	306	343	426	149	96	64	125	86	17	23	102	86	99	116	5	96	114	170	477	8	38	60	143	144	118	253	7	61	46	299	211	705	146	138	98	47	25	13	4	64	98	138	32	14	8	397	171	380	103
C1orf127	0	0	0	0	0	0	5	1	0	2	0	0	0	0	0	0	0	0	0	1	0	0	0	0	1	0	0	0	0	2	3	1	1	0	0	0	0	0	1	0	0	0	0	0	0	1	0	0	0
TARDBP	2368	1940	3578	3928	2075	1568	2116	1839	822	1561	3974	3973	3964	3939	355	2267	1119	1787	4201	406	1160	1967	777	841	1176	2387	435	2061	1646	1735	2070	5865	5511	4002	3166	601	392	2257	437	2809	3137	5833	1093	307	283	2318	1121	1994	2391
MASP2	1	0	1	15	7	6	55	59	2	9	0	0	0	2	0	1	0	0	0	0	0	0	13	6	18	30	2	39	23	0	0	3	29	23	16	22	7	12	6	0	0	1	0	0	0	0	0	1	0
SRM	336	318	458	1274	677	488	2435	1447	198	351	982	926	766	247	30	199	236	598	977	742	332	532	842	811	941	1679	47	258	195	394	325	1167	1162	1200	920	736	451	298	150	518	417	996	60	19	10	280	124	324	478
EXOSC10	1153	933	1506	1676	1010	739	1416	1167	390	667	1664	1720	1426	1242	125	949	522	805	1884	274	466	716	602	588	626	1263	111	571	497	920	993	2997	2252	1856	1461	515	340	1342	235	1470	1682	3045	259	62	65	1010	455	978	930
MTOR	1444	1243	1994	1817	975	779	1152	908	367	680	1812	1784	1517	1263	105	773	471	710	2044	96	505	917	487	496	504	999	148	756	483	1318	1262	4177	2085	1877	1392	341	270	623	163	1604	1469	2560	219	51	62	833	422	881	1208
MTOR-AS1	0	0	0	0	0	0	0	0	0	0	0	0	0	0	0	1	0	0	0	0	0	0	0	1	1	0	0	1	0	0	0	0	1	0	0	0	0	0	0	0	0	0	0	0	0	0	0	0	0
ANGPTL7	0	0	0	0	0	0	0	0	0	0	0	0	0	0	0	0	0	0	0	0	0	0	1	0	0	1	0	2	0	0	0	0	0	0	0	0	0	0	0	0	0	0	3	0	0	0	0	0	0
UBIAD1	175	188	250	468	308	223	439	356	82	150	486	424	391	285	27	209	103	191	480	89	145	215	103	123	125	234	20	155	112	166	175	505	525	444	353	91	66	82	44	452	454	791	52	16	15	338	120	325	206
FBXO2	753	716	1150	143	78	77	628	527	29	47	169	157	132	129	19	69	118	276	463	85	49	91	583	552	748	1278	13	53	45	938	581	1825	214	174	176	339	280	19	10	119	178	292	25	7	7	131	61	194	54
FBXO44	410	431	580	458	286	194	1403	1069	107	187	539	477	456	495	57	391	61	183	374	163	107	161	228	204	283	483	44	252	200	421	357	1052	554	539	423	485	328	75	19	307	400	825	168	44	32	158	71	160	163
FBXO6	114	80	142	198	102	71	231	141	36	88	138	115	110	26	4	23	35	66	140	39	26	66	93	110	131	247	7	32	30	108	84	313	239	214	164	127	104	28	8	123	130	212	14	5	3	296	127	305	127
MAD2L2	100	93	134	504	316	231	653	401	115	229	640	558	514	126	9	93	209	386	871	441	163	211	141	136	109	192	38	175	109	112	81	219	602	618	459	226	124	210	60	453	499	916	33	8	7	293	149	332	229
DRAXIN	1	0	0	1	2	0	0	0	1	0	5	0	0	5	2	3	0	0	0	0	0	0	0	0	0	0	0	5	2	0	0	1	1	3	1	1	0	0	0	5	9	3	3	0	0	2	0	1	1
AGTRAP	600	715	907	1117	670	487	1516	1117	196	372	1196	935	949	612	77	522	312	758	1602	709	275	450	339	375	542	784	77	354	326	689	460	1569	1280	1225	853	676	442	62	59	1048	1071	1846	124	42	25	605	289	778	829
MTHFR	264	233	383	499	265	233	616	486	110	195	385	380	385	440	41	301	75	161	453	32	103	198	89	98	94	204	39	194	150	232	221	645	525	491	331	130	100	87	26	392	439	755	103	33	25	268	136	280	248
CLCN6	197	184	315	614	325	271	508	420	121	206	481	556	459	308	35	260	88	115	362	27	157	230	63	62	88	161	28	119	100	212	206	553	643	548	424	170	110	189	46	531	639	1056	116	35	32	153	68	159	431
NPPA-AS1	4	7	3	15	4	1	11	10	3	7	18	15	11	6	2	8	2	13	12	3	3	3	0	5	2	12	0	0	0	6	7	12	16	12	5	7	1	14	3	7	4	9	2	2	0	0	0	1	6
NPPA	0	1	0	6	2	2	13	14	2	2	0	0	0	0	0	0	0	0	0	0	0	0	2	5	1	2	0	1	0	0	0	6	8	10	1	1	5	0	0	0	0	0	0	0	0	0	0	0	0
NPPB	0	0	0	0	0	0	0	0	0	0	1	0	0	1	0	2	1	0	3	0	0	0	0	0	0	0	0	11	6	0	0	0	1	0	0	0	1	0	0	0	1	0	0	0	0	7	2	10	2
KIAA2013	512	515	694	1397	754	629	1713	1243	225	412	1212	1218	852	820	102	728	652	1407	2853	350	297	453	420	465	541	1009	153	641	475	534	392	1210	1461	1399	1127	432	315	243	79	646	680	1227	174	40	56	742	494	950	515
PLOD1	2445	2258	3490	2656	1606	1198	4084	2843	434	873	2711	2587	2394	2087	205	1592	2110	4364	9426	862	699	1294	1055	1038	1062	2048	808	3784	3008	2614	2022	6241	3284	3188	2381	1151	924	609	248	1259	1855	2897	228	84	59	2808	1501	3282	3545
MFN2	2974	2513	4102	2103	1108	844	946	695	419	709	2003	1842	1734	1808	182	1142	832	1426	3912	70	526	918	1237	1132	1192	2253	202	925	673	2861	2477	7177	2253	2058	1574	250	203	610	192	1261	1172	2281	428	131	88	1561	704	1511	1244
MIIP	117	131	156	318	202	135	494	302	57	120	278	234	261	148	17	118	119	319	534	245	74	115	180	142	192	368	11	36	41	120	110	323	317	373	247	179	94	43	23	179	176	365	54	17	10	240	132	291	159
TNFRSF8	0	0	0	1	1	0	0	0	0	0	1	1	0	1	0	0	0	0	0	0	0	0	0	1	0	2	0	0	3	0	0	0	1	1	0	0	0	0	2	2	0	1	0	0	0	3	1	3	17
TNFRSF1B	0	0	0	6	1	4	6	4	0	2	9	8	5	1	0	6	13	44	93	1	3	2	0	0	0	0	0	16	10	0	2	0	10	6	6	3	3	0	3	28	14	53	5	0	1	138	67	151	46
MIR4632	0	0	0	0	0	0	0	0	0	0	0	0	0	0	0	0	0	0	0	0	0	0	0	0	0	0	0	0	0	0	0	0	0	0	0	0	0	0	0	0	0	0	0	0	0	0	0	0	0
VPS13D	1828	1679	2676	931	481	435	511	481	201	312	1011	931	808	657	43	360	162	233	802	44	263	461	386	334	356	702	81	351	320	1575	1595	4519	1065	874	679	173	103	329	79	1070	1242	1671	127	34	42	460	246	406	432
SNORA59B	0	0	0	0	0	0	0	0	0	0	0	0	0	0	0	0	0	0	0	0	0	0	0	0	0	0	0	0	0	0	0	0	0	0	0	0	0	0	0	0	0	0	0	0	0	0	0	0	0
SNORA59A	0	0	0	0	0	0	0	0	0	0	0	0	0	0	0	0	0	0	0	0	0	0	0	0	0	0	0	0	0	0	0	0	0	0	0	0	0	0	0	0	0	0	0	0	0	0	0	0	0
DHRS3	2125	2051	3004	2556	1478	1081	3273	2561	314	601	2787	2376	2414	2363	252	1745	995	2157	4255	1486	584	1112	156	196	186	328	230	1089	957	1911	1797	4586	2842	2495	1910	1696	1200	408	179	2714	3121	5286	735	212	204	3568	1863	3716	1520
AADACL4	0	0	0	0	0	0	0	0	0	0	0	0	0	0	0	2	0	0	0	0	0	0	0	0	0	0	0	0	0	0	0	0	0	0	0	0	0	0	0	0	0	0	0	0	0	0	0	0	0
AADACL3	0	0	0	0	0	0	0	0	0	0	0	0	0	0	0	0	0	0	0	0	0	0	0	0	0	0	0	0	0	0	0	0	0	0	0	0	0	0	0	0	0	0	0	0	0	0	0	0	0
C1orf158	0	0	0	0	0	0	0	0	0	0	0	0	0	0	0	0	0	0	0	0	0	0	0	0	0	0	0	0	1	0	0	0	0	0	0	0	0	0	0	0	0	0	0	0	0	0	0	0	0
PRAMEF12	0	0	0	0	0	0	0	0	0	0	1	0	0	0	0	0	0	0	0	0	0	0	0	0	0	1	0	0	0	0	0	0	1	0	0	0	0	0	0	0	0	0	0	0	0	0	0	0	0
PRAMEF1	0	0	0	0	0	0	0	0	0	0	0	0	0	0	0	0	0	0	0	0	0	0	0	0	0	0	0	0	0	0	0	0	0	0	0	0	0	0	0	0	0	0	0	0	0	0	0	0	0
PRAMEF11	0	0	0	0	0	0	0	0	0	0	0	0	0	0	0	0	0	0	0	0	0	0	0	0	0	0	0	0	0	0	0	0	0	0	0	0	0	0	0	0	0	0	0	0	0	0	0	0	0
HNRNPCL1	0	0	0	0	0	0	0	0	0	0	0	0	0	0	0	0	0	0	0	0	0	0	0	0	0	0	0	0	0	0	0	0	0	0	0	0	0	0	0	0	0	0	0	0	0	0	0	0	0
PRAMEF2	0	0	0	0	0	0	0	0	0	0	0	0	0	0	0	0	0	0	0	0	0	0	0	0	0	0	0	0	0	0	0	0	0	0	1	0	0	0	0	0	0	0	0	0	0	0	0	0	0
PRAMEF4	0	0	0	0	0	0	0	0	0	0	0	0	0	0	0	0	0	0	0	0	0	0	0	0	0	0	0	0	0	0	0	0	0	0	0	0	0	0	0	0	0	0	0	0	0	0	0	0	1
PRAMEF10	0	0	0	0	0	0	0	0	0	0	0	0	0	0	0	0	0	0	0	0	0	0	0	0	0	0	0	0	0	0	0	0	0	0	0	0	0	0	0	0	0	0	0	0	0	0	0	0	0
PRAMEF8	0	0	0	0	0	0	0	0	0	0	0	0	0	0	0	0	0	0	0	0	0	0	0	0	0	0	0	0	0	0	0	0	0	0	0	0	0	0	0	0	0	0	0	0	0	0	0	0	0
PRAMEF7	0	0	0	0	0	0	0	0	0	0	0	0	0	0	0	0	0	0	0	0	0	0	0	0	0	0	0	0	0	0	0	0	0	0	0	0	0	0	0	0	0	0	0	0	0	0	0	0	0
PRAMEF6	0	0	0	0	0	0	0	0	0	0	0	0	0	0	0	0	0	0	0	0	0	0	0	0	0	0	0	0	0	0	0	0	0	0	0	0	0	0	0	0	0	0	0	0	0	0	0	0	0
PRAMEF22	0	0	0	0	0	0	0	0	0	0	0	0	0	0	0	0	0	0	0	0	0	0	0	0	0	0	0	0	0	0	0	0	0	0	0	0	0	0	0	0	0	0	0	0	0	0	0	0	0
PRAMEF5	0	0	0	0	0	0	0	0	0	0	0	0	0	0	0	0	0	0	0	0	0	0	0	0	0	0	0	0	0	0	0	0	0	0	0	0	0	0	0	0	0	0	0	0	0	0	0	0	0
PRAMEF9	0	0	0	0	0	0	0	0	0	0	0	0	0	0	0	0	0	0	0	0	0	0	0	0	0	0	0	0	0	0	0	0	0	0	0	0	0	0	0	0	0	0	0	0	0	0	0	0	0
PRAMEF15	0	0	0	0	0	0	0	0	0	0	0	0	0	0	0	0	0	0	0	0	0	0	0	0	0	0	0	0	0	0	0	0	0	0	0	0	0	0	0	0	0	0	0	0	0	0	0	0	0
PRAMEF14	0	0	0	0	0	0	0	0	0	0	0	0	0	0	0	0	0	0	0	0	0	0	0	0	0	0	0	0	0	0	0	0	0	0	0	0	0	0	0	0	0	0	0	0	0	0	0	0	0
PRAMEF13	0	0	0	0	0	0	0	0	0	0	0	0	0	0	0	0	0	0	0	0	0	0	0	0	0	0	0	0	0	0	0	0	0	0	0	0	0	0	0	0	0	0	0	0	0	0	0	0	0
PRAMEF19	0	0	0	0	0	0	0	0	0	0	0	0	0	0	0	0	0	0	0	0	0	0	0	0	0	0	0	0	0	0	0	0	0	0	0	0	0	0	0	0	0	0	0	0	0	0	0	0	0
PRAMEF18	0	0	0	0	0	0	0	0	0	0	0	0	0	0	0	0	0	0	0	0	0	0	0	0	0	0	0	0	0	0	0	0	0	0	0	0	0	0	0	0	0	0	0	0	0	0	0	0	0
PRAMEF20	0	0	0	0	0	0	0	0	0	0	0	0	0	0	0	0	0	0	0	0	0	0	0	0	0	0	0	0	0	0	0	0	0	0	0	0	0	0	0	0	0	0	0	0	0	0	0	0	0
PRAMEF17	0	0	0	0	0	0	0	0	0	0	0	0	0	0	0	0	0	0	0	0	0	0	0	0	0	0	0	0	0	0	0	0	0	0	0	0	0	0	0	0	0	0	0	0	0	0	0	0	0
LRRC38	0	0	0	0	0	0	4	0	0	0	0	0	0	0	0	0	0	0	0	0	0	0	0	0	0	0	0	1	1	0	0	0	0	0	2	0	1	3	0	1	0	6	0	0	0	0	0	0	9
PDPN	1073	941	1617	0	0	0	0	0	0	0	0	1	0	0	0	0	0	0	0	0	0	0	564	535	525	959	0	0	0	1107	1163	3350	0	0	0	2	0	0	0	1	0	0	0	0	0	0	0	0	0
PRDM2	1020	926	1319	462	280	209	254	254	87	198	463	501	406	455	30	287	211	230	730	11	111	215	233	215	179	432	66	283	198	791	848	2549	634	484	400	68	38	242	46	516	530	938	110	30	39	540	248	486	327
KAZN	127	175	249	75	45	47	58	47	18	37	88	107	70	60	16	58	18	65	114	6	26	31	62	68	72	157	10	35	38	158	143	408	104	95	63	18	12	39	11	96	82	165	19	4	5	59	27	62	71
TMEM51-AS1	43	57	67	25	11	11	18	20	4	7	40	38	31	110	12	91	87	170	479	3	11	14	8	8	5	7	2	7	12	59	40	138	22	18	18	13	9	8	3	59	96	119	14	8	4	274	162	299	46
TMEM51	207	225	383	770	483	385	632	523	122	279	819	747	672	727	70	487	624	1122	2371	78	189	278	119	141	159	269	62	281	223	275	246	812	946	799	643	225	175	212	52	1032	969	1970	162	46	59	1829	1049	2205	764
FHAD1	2	0	1	20	16	9	24	21	6	7	20	16	16	12	0	5	17	8	24	0	8	13	0	0	0	1	3	8	3	2	0	6	21	17	15	5	3	8	0	14	15	15	4	3	0	5	4	14	10
EFHD2	1058	1051	1496	5758	3292	2656	1767	1336	642	1249	3380	3156	3162	3831	340	2793	750	1673	3609	684	772	1063	751	810	979	1765	349	1818	1628	1546	1021	3404	5690	5761	4464	1270	825	745	324	1541	2282	3412	588	212	141	1085	556	1169	3408
CTRC	0	0	0	1	1	0	5	0	1	0	1	2	0	9	0	0	0	0	2	0	0	0	1	1	0	0	1	3	3	0	1	0	1	0	0	1	0	0	0	0	0	1	0	1	0	0	1	0	3
CELA2A	0	0	0	0	0	0	2	0	0	0	0	0	0	0	0	0	0	0	0	0	0	0	0	0	0	0	0	0	0	0	0	0	0	0	0	0	0	0	0	0	0	0	0	0	0	0	0	0	0
CELA2B	0	0	0	2	3	1	2	4	0	0	0	0	0	1	0	0	0	0	0	0	0	0	0	0	0	0	0	2	2	0	0	0	4	1	4	0	1	2	1	0	0	0	0	0	0	0	0	0	0
CASP9	111	86	123	338	210	154	369	284	70	119	365	311	302	254	22	163	94	176	403	22	64	149	33	38	37	80	22	168	138	85	73	244	377	410	276	98	70	72	43	223	247	474	64	33	19	157	81	161	203
DNAJC16	430	490	901	392	198	178	292	302	85	153	336	370	290	410	33	273	122	143	460	15	105	137	110	113	155	348	57	223	207	387	396	1205	525	411	321	103	46	203	35	427	488	825	87	30	32	256	152	245	346
AGMAT	25	12	25	283	150	129	245	230	54	94	305	282	280	137	8	130	44	79	135	68	89	169	10	10	20	39	6	57	62	9	6	46	369	312	227	30	23	52	17	185	141	256	54	20	4	28	12	37	63
DDI2	92	71	140	105	56	63	4	8	26	38	100	118	90	87	6	50	12	23	83	1	21	42	18	13	14	36	8	35	23	75	57	274	124	104	73	3	1	35	15	97	122	163	14	4	5	33	10	49	65
RSC1A1	95	78	174	61	25	18	44	40	16	25	71	72	64	56	10	25	16	8	58	5	27	36	29	22	19	53	5	38	23	85	86	262	83	55	40	25	7	60	15	72	90	138	7	2	8	41	7	40	77
PLEKHM2	1003	993	1340	1336	695	558	1060	872	191	323	1117	1059	924	769	78	604	269	679	1449	305	327	511	508	485	574	1057	76	428	296	1068	797	2434	1332	1265	971	342	197	244	101	898	1017	1722	348	100	60	837	419	931	952
SLC25A34	4	16	11	13	13	6	56	29	2	5	22	30	18	4	0	13	9	4	16	3	3	4	5	11	3	8	0	3	2	13	8	31	21	15	8	13	6	7	2	5	9	17	1	0	0	11	2	7	10
TMEM82	0	0	0	0	2	0	0	1	0	0	0	1	0	0	0	0	0	0	1	0	1	0	0	0	0	0	0	0	0	0	0	0	0	0	0	0	0	0	0	0	0	0	0	0	0	1	0	1	0
FBLIM1	2738	2359	3579	775	468	341	770	597	116	208	762	678	536	1000	95	739	124	264	644	165	187	317	1345	1351	1513	2766	50	264	259	2589	2431	7088	992	870	743	265	182	90	74	1009	909	1634	196	52	39	473	187	448	470
UQCRHL	77	64	127	156	69	65	184	123	21	53	183	201	135	242	15	139	190	436	868	46	29	59	51	46	77	143	32	144	105	81	66	200	168	181	84	47	54	131	11	128	167	344	23	14	15	322	165	320	75
FLJ37453	8	14	25	126	82	50	110	104	22	60	98	83	76	64	5	44	27	68	127	17	15	35	13	9	15	26	4	19	26	16	15	36	116	125	85	32	11	35	17	66	72	141	15	6	4	62	20	47	19
SPEN	2419	2036	3321	1785	913	784	635	618	350	613	1608	1639	1396	1460	137	928	322	526	1633	65	537	925	566	476	325	721	173	904	642	2197	2038	6206	1875	1629	1337	331	189	992	212	1724	1719	2782	500	132	118	1511	724	1511	1511
ZBTB17	189	230	320	328	225	183	514	348	60	115	348	312	346	346	53	292	95	233	464	103	83	157	168	124	177	358	34	134	103	324	179	648	387	408	304	203	114	134	19	197	294	474	206	46	39	335	183	426	207
HSPB7	1	4	3	0	0	1	0	0	0	0	0	0	0	1	0	1	0	1	0	0	0	0	1	2	0	1	0	2	2	1	1	6	0	2	0	0	0	0	0	0	0	0	0	0	0	0	0	0	0
CLCNKA	0	0	0	3	0	1	7	5	0	0	2	5	2	13	1	4	0	0	0	0	0	0	0	0	0	0	0	5	5	0	0	3	0	0	0	3	2	0	0	0	8	2	4	0	0	1	0	1	0
CLCNKB	1	2	0	2	1	0	3	1	0	0	4	4	0	0	0	0	0	2	3	0	0	0	0	0	0	0	0	3	3	0	0	0	5	0	1	1	0	0	0	1	1	12	0	0	0	1	2	9	0
FAM131C	15	28	33	139	75	61	183	130	24	44	107	97	121	78	8	76	11	23	75	73	37	72	13	7	11	20	9	51	39	18	12	55	132	141	107	74	50	16	9	111	166	222	14	6	2	22	10	30	39
EPHA2	1887	1841	2616	4566	2597	1938	3286	2410	725	1226	3161	3059	2686	4352	432	3216	1220	2465	5870	323	1065	1455	1665	1691	2173	3956	362	1913	1503	2745	1948	6368	5336	5186	4203	1253	922	1173	568	4578	3902	7919	1396	373	349	6596	2769	6587	4183
ARHGEF19	75	90	99	171	88	64	205	168	26	47	185	152	122	72	4	39	107	272	571	34	38	73	36	33	34	75	5	49	41	89	36	173	206	216	171	89	91	44	22	113	104	186	18	5	6	88	67	118	80
FBXO42	262	197	344	298	197	145	314	214	73	129	352	352	267	394	40	274	92	215	489	26	84	130	154	149	163	338	39	241	185	189	223	605	403	349	247	83	56	85	17	368	341	610	80	30	16	238	158	301	184
SZRD1	1803	1680	2782	2843	1720	1246	2216	1727	446	854	2780	2562	2452	2529	266	1798	931	1934	4336	594	801	1407	623	661	566	1037	250	1204	853	1937	1552	4873	3134	2916	2277	595	376	491	134	1591	1651	3126	581	150	94	1948	952	1905	1469
SPATA21	0	0	0	0	0	0	9	7	1	0	0	0	1	1	0	1	0	0	0	0	0	0	0	0	0	0	0	0	0	0	0	0	1	1	1	0	3	0	1	2	2	9	0	0	0	0	0	1	0
NECAP2	875	726	1159	968	607	456	401	366	149	315	907	830	790	1261	112	939	312	655	1274	205	224	347	416	377	521	940	148	680	566	933	865	2470	1244	1072	764	195	128	189	73	713	782	1486	208	71	51	940	501	877	902
CROCCP3	25	21	30	136	55	52	243	154	13	35	71	91	96	88	7	70	14	20	60	4	26	38	1	5	9	12	9	57	37	18	14	50	107	93	93	45	30	33	6	56	89	161	19	6	12	26	3	21	22
MIR3675	0	0	0	0	0	0	0	0	0	0	0	0	0	0	0	0	0	0	0	0	0	0	0	0	0	0	0	0	0	0	0	0	0	0	0	0	0	0	0	0	0	0	0	0	0	0	0	0	0
NBPF1	313	332	526	982	476	419	291	316	275	463	1047	1013	1095	755	49	397	106	125	390	6	291	476	122	102	114	257	54	241	182	273	318	840	1137	925	687	156	51	459	104	1117	1143	1996	110	37	31	122	73	157	521
CROCCP2	54	83	97	517	289	226	656	477	87	139	494	420	395	263	24	184	36	120	320	50	107	170	52	45	93	175	19	83	77	76	52	145	503	495	366	238	105	100	31	240	219	516	96	19	28	115	50	152	143
MST1P2	13	12	24	46	25	17	262	179	5	12	63	35	36	31	1	22	0	3	9	1	3	20	14	10	25	41	1	8	10	16	12	42	48	38	42	78	43	5	6	53	62	110	8	4	1	5	3	5	9
ESPNP	0	0	0	0	1	0	1	0	0	0	1	0	0	0	0	1	0	1	4	0	0	0	0	0	0	0	0	0	0	0	0	2	1	0	0	0	0	0	0	0	0	0	0	0	0	1	3	8	0
MST1L	4	9	8	7	9	5	76	41	0	5	11	3	4	6	0	5	1	1	6	1	1	2	1	0	1	1	0	3	2	11	5	11	16	16	8	21	7	1	0	5	9	30	1	0	0	4	5	2	3
CROCC	69	83	130	464	232	192	908	616	77	129	433	414	424	171	18	113	54	141	275	50	91	133	93	85	143	269	7	40	32	86	74	186	447	452	345	239	161	65	20	226	306	490	30	12	12	102	82	138	87
MFAP2	879	872	1102	0	1	0	0	0	0	0	0	0	0	0	0	0	5	6	13	0	0	0	332	350	343	577	0	1	0	907	794	2352	0	0	0	0	0	2	0	0	0	1	0	0	0	5	3	6	0
ATP13A2	737	745	992	1274	628	539	578	398	145	250	1023	1006	859	449	44	326	379	865	1766	288	211	404	966	922	851	1680	42	260	178	973	644	2175	1190	1207	866	222	125	110	64	448	620	947	53	25	9	554	244	669	437
SDHB	955	828	1343	1733	951	708	1602	1291	308	748	1969	1642	1478	1444	140	818	490	1105	2293	515	492	721	505	448	688	1210	139	672	506	950	879	2853	2457	1864	1436	423	332	933	226	1234	1341	2471	182	77	62	873	434	819	1038
PADI2	38	37	67	142	74	53	66	99	39	57	119	144	133	54	5	36	7	21	47	12	28	48	13	20	15	31	15	51	38	55	46	143	185	159	117	30	25	68	19	84	201	304	12	1	0	40	17	46	10
PADI1	297	334	455	108	55	50	81	53	16	47	82	62	74	95	10	56	16	41	118	22	20	37	126	143	334	560	6	21	17	305	318	1045	101	88	78	10	7	27	8	33	37	80	16	6	5	111	67	101	14
PADI3	453	459	604	63	54	45	60	40	35	66	102	77	103	42	2	8	2	2	7	15	21	52	38	35	66	92	2	13	17	242	217	836	89	91	65	39	27	60	20	123	150	227	1	0	0	4	1	1	63
PADI4	1	0	1	0	0	0	0	0	0	1	0	0	0	0	1	0	1	0	0	0	0	0	0	0	1	0	0	1	0	1	0	3	0	0	0	0	0	0	0	0	1	0	0	1	0	0	0	1	0
PADI6	1	0	0	0	0	0	0	0	0	0	0	0	0	0	0	0	0	0	0	0	0	0	0	0	0	0	0	0	1	0	0	0	0	0	0	0	0	0	0	0	0	0	0	0	0	0	0	0	0
RCC2	3162	2702	4028	2940	1734	1366	3093	2234	732	1236	3096	3120	2934	3606	344	2341	1063	1922	4525	389	798	1367	1359	1480	1831	3802	368	1851	1498	2585	2614	8035	3348	3049	2309	732	479	915	285	2570	2455	4758	563	165	158	2264	1237	2538	1678
ARHGEF10L	166	189	236	530	324	248	895	530	88	129	474	427	389	316	38	244	138	323	737	27	124	215	147	171	209	399	22	117	91	188	121	458	526	488	402	184	130	65	25	297	355	623	93	25	21	356	171	389	208
ACTL8	0	0	0	10	11	4	2	1	2	5	13	7	7	9	0	0	1	1	4	3	2	3	0	0	0	1	3	2	5	0	0	0	10	8	7	0	0	6	1	0	1	10	4	0	0	1	0	1	4
IGSF21	0	0	0	0	0	0	0	0	0	0	0	0	0	0	0	0	0	0	0	0	0	0	0	0	0	0	0	0	0	0	0	0	0	0	0	0	0	0	0	0	0	0	0	0	0	0	0	0	0
KLHDC7A	17	8	10	370	240	157	251	192	79	143	256	229	196	635	58	385	171	328	824	25	99	126	1	1	1	5	55	269	177	5	13	16	339	335	252	23	19	62	20	44	45	83	139	31	20	339	140	358	61
PAX7	1	0	0	87	57	36	185	178	66	132	84	66	84	352	32	266	0	0	0	2	39	72	0	0	0	0	17	62	54	0	0	0	114	95	76	52	41	75	20	65	52	95	70	16	21	0	0	0	56
TAS1R2	0	0	0	0	0	0	0	0	0	0	0	1	0	1	0	0	0	0	0	0	0	0	1	0	0	0	0	0	0	0	0	0	0	0	0	0	0	0	0	0	0	0	0	0	0	0	0	2	0
ALDH4A1	561	528	768	706	420	313	610	486	87	191	803	728	651	1976	205	1463	238	440	1027	89	161	291	277	204	368	728	90	450	390	581	371	1260	715	786	563	109	100	58	30	228	205	341	289	83	66	273	140	349	222
MIR4695	0	0	0	0	0	0	0	0	0	0	0	0	0	0	0	0	0	0	0	0	0	0	0	0	0	0	0	0	0	0	0	0	0	0	0	0	0	0	0	0	0	0	0	0	0	0	0	0	0
IFFO2	852	737	1160	1374	722	576	615	495	216	407	1761	1630	1675	2156	201	1411	265	425	1015	120	444	697	378	332	235	578	178	934	810	669	636	1772	1531	1369	1072	179	126	421	116	853	816	1559	483	130	107	831	450	866	944
UBR4	3451	3070	5064	6116	3233	2353	2616	2259	1177	2033	5103	4726	4094	4735	379	3044	1193	1761	5501	674	1467	2615	987	976	793	1607	469	2363	1746	3276	3209	9579	6622	5738	4285	1074	766	1967	509	5171	6052	8813	1284	344	297	4026	1881	4356	6136
EMC1	1101	955	1601	1393	780	573	869	798	261	475	1502	1392	1272	1726	156	1131	643	1153	3177	163	367	701	539	542	617	1206	194	1014	735	1005	965	3020	1742	1451	1104	286	204	497	155	1766	1662	2882	251	77	62	1102	587	1185	1109
MRTO4	678	456	845	1623	924	689	1511	1137	271	513	1400	1161	1159	1493	114	840	394	903	1795	654	388	546	509	494	700	1120	176	786	686	530	560	1714	1917	1733	1272	303	323	471	179	1147	878	1802	264	64	47	733	340	686	668
AKR7L	2	0	7	8	0	1	27	16	2	2	5	12	5	8	0	2	5	8	10	0	1	2	3	2	0	3	0	5	6	2	1	0	5	3	2	5	4	6	1	3	4	4	0	0	2	3	1	5	0
AKR7A3	5	2	2	5	4	2	19	20	1	1	7	7	5	9	1	5	16	20	64	3	2	3	3	2	0	1	0	5	2	1	0	6	6	6	3	6	2	0	0	4	2	4	0	0	0	27	16	40	1
LOC100506730	63	48	62	28	16	9	65	45	5	11	29	22	30	20	2	13	7	19	55	2	6	11	9	15	19	23	4	20	15	36	54	156	31	29	12	26	5	11	1	22	25	62	10	0	2	14	14	23	9
AKR7A2	425	397	583	1172	666	493	912	750	210	356	1023	944	784	336	31	246	296	678	1278	410	275	303	206	212	295	520	33	187	187	307	312	976	1206	1142	855	225	156	164	68	501	521	873	54	18	13	281	197	406	259
PQLC2	125	131	187	394	230	189	470	303	34	84	281	272	239	286	25	232	61	153	367	109	81	118	144	137	122	258	28	149	122	147	106	334	381	355	302	144	81	23	26	155	167	279	41	15	4	113	63	160	209
CAPZB	3202	2750	4056	3351	2134	1600	3534	2634	636	1081	3343	3203	2746	3933	359	2560	1691	3194	7026	932	914	1518	1673	1945	2351	3801	409	1923	1712	2668	2805	8494	3961	3659	2794	1178	669	1354	285	2685	3007	5577	398	126	98	2810	1375	2828	2384
MINOS1	268	274	439	616	326	194	611	482	85	147	522	376	294	527	27	377	224	448	834	191	89	144	246	268	494	788	50	352	307	257	261	708	765	565	409	111	106	263	68	382	318	561	73	33	33	289	139	289	247
NBL1	0	3	0	11	5	8	1	1	1	6	2	2	1	1	0	3	1	8	19	0	0	0	0	0	5	12	0	0	1	3	3	2	6	12	7	2	0	0	0	0	0	3	0	1	0	2	2	15	4
HTR6	0	0	0	5	3	3	3	2	2	4	8	10	4	0	0	0	0	1	0	1	2	0	0	0	0	0	1	1	0	0	0	0	6	12	6	2	0	1	0	0	5	1	0	0	0	0	0	0	2
TMCO4	128	117	173	234	147	113	303	240	56	91	223	208	204	127	14	78	106	176	362	41	43	106	56	47	55	108	18	81	73	100	111	350	249	220	183	75	56	62	17	265	235	411	17	11	4	196	100	222	94
RNF186	0	0	0	0	0	0	0	1	0	0	0	0	0	0	0	0	2	7	12	0	0	0	0	0	0	0	0	0	0	0	0	0	0	0	0	0	0	0	0	0	0	0	0	0	0	4	1	4	0
OTUD3	107	120	234	161	110	88	178	155	39	77	188	161	183	134	13	67	96	168	454	3	40	78	54	45	70	134	17	64	51	119	134	408	232	144	145	46	17	84	18	162	195	370	70	11	20	185	74	198	86
PLA2G2E	0	0	0	0	0	0	0	0	0	0	0	0	0	0	0	0	0	0	0	0	0	0	0	0	0	0	0	0	0	0	0	0	0	0	0	0	0	0	0	0	0	0	0	0	0	0	0	0	0
PLA2G2A	0	0	0	0	0	0	5	0	0	0	0	3	0	0	0	0	0	0	0	0	0	0	0	0	0	0	0	0	0	0	0	0	0	0	0	0	0	0	0	0	0	0	0	0	0	0	0	0	0
PLA2G5	0	0	0	0	0	0	0	0	0	0	0	0	0	0	0	0	0	0	1	0	0	0	0	0	0	0	0	0	0	0	0	0	0	0	0	0	0	0	0	0	0	0	0	0	0	0	0	0	0
PLA2G2D	0	0	0	0	0	0	0	0	0	0	0	0	0	0	0	0	0	0	0	0	0	0	0	0	0	0	0	0	0	0	0	0	0	0	0	0	0	0	0	0	0	0	0	0	0	0	0	0	0
PLA2G2F	0	0	0	0	0	0	0	0	0	0	0	0	0	0	0	0	0	0	0	0	0	0	0	0	0	0	0	0	0	0	0	3	0	0	0	0	0	1	0	0	0	0	0	0	0	0	0	1	0
PLA2G2C	0	0	0	0	0	0	0	0	0	0	0	0	0	0	0	0	0	0	0	0	0	0	0	0	0	0	0	0	0	0	0	0	0	0	0	0	0	0	0	0	0	0	0	0	0	0	0	0	0
UBXN10	8	3	5	2	2	1	3	2	0	0	1	0	0	2	0	0	3	19	47	0	1	1	4	4	0	4	2	1	2	1	4	20	7	7	4	0	2	0	0	3	2	1	0	0	0	15	9	17	1
VWA5B1	0	0	0	0	0	0	0	0	0	0	0	0	0	0	0	0	0	0	0	0	0	0	0	0	0	0	0	0	0	0	0	0	0	0	0	0	0	0	0	0	0	0	0	0	0	0	0	0	0
CAMK2N1	1973	1866	2589	1067	582	497	1309	1468	115	294	1208	1280	1293	485	54	329	566	1074	2062	334	317	774	456	446	647	1269	172	726	680	1321	1368	4210	1528	1347	892	632	252	323	70	902	1764	2624	102	26	29	1143	722	1221	611
MUL1	688	566	887	1000	616	433	494	480	144	242	997	869	742	1016	96	688	237	515	1201	153	257	405	324	325	421	844	107	554	454	563	584	1628	1082	1041	757	141	122	165	63	571	569	945	207	46	52	537	245	566	433
FAM43B	0	0	0	136	81	54	78	51	12	27	102	115	81	9	0	7	0	0	0	37	27	40	0	0	1	0	2	8	12	0	0	0	128	102	88	33	29	1	1	36	35	63	3	0	0	0	0	0	55
CDA	671	668	905	329	222	162	1164	802	46	135	372	285	256	628	62	442	132	320	776	214	82	146	378	389	338	563	27	109	121	737	747	2752	432	428	254	490	330	33	24	409	621	1041	80	22	22	539	280	538	435
PINK1	1390	1342	2026	1862	1005	884	885	824	304	581	1585	1416	1260	1246	123	969	258	572	1250	261	383	619	134	122	157	248	113	557	455	1370	1198	3572	1821	1704	1312	286	208	310	106	1089	1173	2040	159	39	34	617	308	738	696
DDOST	3758	3581	4969	4914	3106	2151	7398	5587	1033	2083	5369	4616	4365	6307	522	4139	3032	6483	14059	1108	1274	2098	1455	1579	1649	3172	757	3517	2958	3395	3220	8910	5940	5501	4103	1975	1488	1250	564	4693	4652	7953	888	280	221	5088	2732	5552	3210
KIF17	14	3	3	24	15	12	29	24	6	9	31	26	11	12	3	17	2	2	9	6	7	8	4	2	7	4	5	13	12	4	0	14	39	33	31	11	5	6	2	10	27	41	4	1	1	4	2	3	10
SH2D5	138	128	281	328	201	135	207	147	35	59	162	173	158	217	24	167	15	31	45	56	63	87	223	224	396	819	12	58	64	152	106	433	288	295	235	52	37	19	7	99	72	215	113	26	19	34	9	24	181
HP1BP3	2149	1882	2787	3361	1951	1564	2980	2732	800	1679	3671	3555	3359	1495	118	899	654	939	2508	123	860	1549	496	495	606	1273	137	687	583	1505	1772	5310	4821	3603	3062	605	344	1970	357	3425	4011	6608	446	117	124	1173	616	1059	1523
EIF4G3	2835	2424	4001	1999	1039	919	1473	1328	371	788	2151	2168	1902	2243	198	1417	381	474	1551	57	550	967	566	599	647	1406	290	1266	934	2448	2677	7936	2630	2126	1715	590	349	1041	211	1992	1983	3692	466	116	121	976	512	929	1369
ECE1	2628	2387	3387	6003	3494	2515	3483	2604	732	1339	5705	5209	4869	2595	297	1874	1627	3069	7636	373	1380	2546	814	765	661	1282	405	1902	1444	2669	2281	6759	6744	6188	4636	944	566	1100	272	7837	6990	12717	401	104	101	7599	3550	7786	2855
LOC100506801	1	0	2	21	11	11	37	36	4	4	14	16	14	12	2	5	0	1	0	2	3	3	0	1	1	0	4	9	10	1	2	5	22	21	20	12	16	5	1	49	55	128	3	2	0	13	8	9	1
NBPF3	172	134	228	267	153	100	134	115	54	146	271	258	305	174	13	112	25	41	104	3	77	140	73	47	61	148	10	67	49	165	128	474	329	276	236	50	35	131	28	262	312	522	24	4	2	65	14	53	110
ALPL	0	3	6	8	6	4	22	12	1	3	9	14	8	0	0	0	4	9	33	4	3	10	0	2	0	0	3	0	1	5	3	8	8	4	5	1	1	1	1	2	8	16	0	0	0	16	5	23	7
RAP1GAP	35	41	43	1724	886	746	2422	1728	384	772	1445	1318	1203	1046	94	796	194	352	944	419	601	1221	35	48	59	96	86	315	243	33	21	123	1245	1077	914	292	170	321	130	513	490	989	154	35	35	316	138	317	147
USP48	1337	1288	2272	915	442	329	613	798	203	514	864	850	834	910	81	500	416	668	1521	50	204	354	299	281	309	680	100	513	392	1040	1196	3233	1412	1054	769	251	144	539	103	832	1008	1686	112	30	30	703	422	682	589
LDLRAD2	15	50	13	3	3	4	11	4	0	0	0	0	0	1	0	0	0	1	2	0	0	0	3	4	2	9	0	2	5	28	22	52	5	3	4	3	2	1	0	1	3	0	0	0	0	0	0	1	0
HSPG2	3842	4335	5655	4741	2297	1813	756	577	551	958	4176	4112	3801	14642	1397	10504	3622	6747	19948	329	1228	1943	1036	863	557	1233	428	2481	1635	5372	2937	9604	4371	4175	3079	260	154	386	215	4146	4758	6822	1196	487	278	9750	4476	11630	2716
CELA3B	0	0	2	0	0	0	0	0	0	0	1	0	0	0	0	0	0	0	0	0	0	0	0	0	0	0	0	0	0	0	0	0	0	0	0	0	0	0	0	0	0	0	0	0	0	0	2	0	0
CELA3A	0	0	0	0	0	0	0	0	0	0	2	0	0	0	0	0	0	1	1	0	0	1	0	0	0	0	0	0	2	0	0	0	0	0	0	0	0	0	0	0	0	0	0	0	0	0	1	1	0
LINC00339	20	25	45	369	207	147	358	444	62	149	359	331	275	230	19	155	56	146	275	61	58	141	14	18	18	48	20	126	110	16	24	67	568	417	272	139	91	109	49	389	388	718	75	18	11	163	87	186	122
CDC42	4261	4097	7429	3437	1784	1147	1842	2350	649	1422	3430	3298	3277	4701	459	2800	2637	4266	9980	357	944	1701	1594	1708	2688	5525	579	2498	2068	3299	3785	10877	5221	3370	2538	738	326	1706	310	3086	3756	6227	728	228	219	4556	2654	4315	2759
WNT4	70	94	100	17	11	5	76	50	2	1	10	1	11	4	2	5	35	54	131	3	1	8	6	6	8	8	3	12	6	182	126	232	8	9	9	19	20	0	2	11	7	22	1	2	0	118	56	115	13
ZBTB40	645	624	954	985	534	417	883	647	219	410	876	869	771	943	81	608	183	281	879	47	242	418	163	166	194	400	73	403	295	572	573	1683	1009	990	742	241	194	336	83	789	886	1583	248	85	68	409	230	448	578
EPHA8	0	5	0	0	0	0	0	0	0	0	0	0	0	1	0	0	0	2	5	0	0	0	0	1	0	1	0	2	2	2	0	3	0	0	0	0	0	0	0	0	0	5	4	1	0	1	0	1	0
C1QA	0	0	0	0	0	0	0	0	0	0	0	0	0	0	0	0	0	0	0	0	0	0	0	0	0	0	0	1	0	0	0	0	0	0	1	0	0	0	0	0	0	0	0	0	0	0	0	0	0
C1QC	0	0	0	0	0	0	0	0	0	0	0	0	0	0	0	0	0	0	0	0	0	0	0	0	0	0	1	1	0	0	0	0	0	0	0	1	0	0	0	0	0	0	0	0	0	0	0	0	0
C1QB	0	0	0	0	0	0	0	0	0	0	0	0	0	0	0	0	0	0	0	0	0	0	0	0	0	0	0	0	0	0	0	0	0	0	0	0	0	0	0	0	0	0	0	0	0	0	0	0	0
EPHB2	1331	1266	1692	2781	1584	1280	594	522	295	520	2650	2770	2458	1348	127	904	361	682	1489	471	688	1070	297	312	262	448	108	615	522	1232	1074	3150	2957	2925	2237	477	414	406	114	5004	4979	9464	191	55	57	1168	523	1163	3071
MIR4684	0	1	0	0	0	0	0	0	0	0	0	0	0	0	0	0	0	0	0	0	0	0	0	0	0	0	0	0	0	0	0	0	1	0	0	1	0	0	0	0	0	0	0	0	0	0	0	0	0
MIR4253	4	1	0	0	0	0	0	0	0	0	0	0	0	0	0	0	0	0	0	0	0	0	0	0	0	0	0	0	0	0	0	10	0	1	0	0	0	0	0	0	0	0	0	0	0	0	0	0	0
KDM1A	1302	1122	2066	1982	1143	897	1476	1144	415	782	2442	2318	2090	1756	155	1048	902	1511	3380	336	572	887	652	763	900	1793	198	930	760	1095	1207	3565	2751	2289	1742	428	352	1129	219	1958	2038	3875	315	90	103	1440	820	1473	1307
MIR3115	0	0	0	0	0	0	0	0	0	0	0	0	0	0	0	0	0	0	0	0	0	0	0	0	0	0	0	0	0	0	0	0	0	0	0	0	0	0	0	0	0	0	0	0	0	0	0	0	0
LUZP1	2922	2449	4295	2139	1070	1025	416	392	300	609	1486	1366	1346	2326	152	1328	186	282	904	70	412	723	671	646	564	1219	218	999	783	2664	2723	7922	2360	1950	1689	179	117	565	124	2398	2277	3590	465	150	150	629	302	631	1528
HTR1D	1	4	0	822	478	321	262	244	121	244	618	603	464	374	33	300	16	45	86	143	181	279	0	0	0	0	33	167	134	1	0	7	872	750	589	159	95	203	41	1138	1059	1988	88	19	18	67	20	63	264
HNRNPR	4167	4042	7375	5106	2776	2153	2624	2397	1290	2875	5185	5274	6107	4808	436	2496	1232	1721	4286	137	1637	2821	953	1023	1160	2302	555	2684	2080	3456	3725	10005	7314	5551	4222	666	402	3546	465	3908	3861	7463	737	223	221	2015	1049	1712	3392
ZNF436	590	515	892	235	108	95	93	108	51	103	231	225	183	382	32	217	101	76	284	5	64	107	117	113	186	364	37	244	143	394	454	1254	339	216	135	35	16	112	20	344	356	589	428	108	92	380	192	370	173
TCEA3	43	41	31	4	2	5	34	14	6	11	11	12	4	26	3	20	62	114	225	6	2	2	5	7	6	10	4	18	6	25	24	73	8	14	9	4	6	8	1	20	13	24	8	1	3	87	46	66	5
ASAP3	110	137	188	179	104	92	346	267	41	66	192	192	140	184	9	102	13	45	126	16	43	69	39	36	43	91	17	99	88	112	93	250	220	217	183	90	54	68	14	187	156	305	47	7	14	52	31	42	86
E2F2	7	4	9	383	207	156	125	128	43	94	332	310	299	12	0	1	92	175	421	48	93	153	13	6	10	11	6	30	23	2	6	13	381	366	341	22	22	55	20	134	69	170	6	2	1	92	49	95	43
ID3	683	735	1228	4112	2489	1791	5015	4169	282	690	3721	3478	2603	3335	341	2782	81	246	426	619	621	955	550	602	662	1133	202	877	826	686	514	1588	4519	4141	3170	2561	1672	401	303	1500	1746	3037	1854	538	392	165	82	180	1083
MDS2	0	0	0	1	0	0	2	2	0	0	1	0	0	3	1	3	0	0	0	0	0	0	0	0	0	0	0	0	0	0	0	0	1	0	0	2	3	0	0	0	1	0	0	0	0	0	0	0	0
RPL11	20603	16960	28510	12416	7396	6024	25092	15442	2299	5310	13662	11256	11980	14492	1121	8790	4229	8930	17396	8976	3430	5034	5102	5262	7659	12567	1780	7882	6594	16694	17730	54125	16909	14307	9684	5546	4709	10614	1583	14314	14632	29198	2982	783	887	9496	5589	10445	7477
PITHD1	369	277	501	529	287	226	287	246	113	229	529	515	464	550	56	292	259	461	993	92	118	208	192	185	299	535	42	266	195	295	291	802	647	468	354	67	55	154	50	462	402	895	108	39	29	382	194	432	263
LYPLA2	963	972	1463	1006	557	391	1185	923	175	343	1074	1033	969	991	119	705	620	1477	2960	473	276	477	690	691	956	1762	115	529	453	1129	781	2569	1058	985	794	416	308	124	75	531	606	1021	306	95	58	911	480	1040	715
GALE	478	497	670	1482	955	686	1797	1207	189	295	1168	1070	914	1070	100	742	451	1127	2152	260	279	407	376	417	463	705	164	649	592	567	485	1440	1567	1554	1088	537	426	166	104	1400	1366	2389	185	50	34	924	499	996	729
HMGCL	608	450	649	375	227	207	733	565	72	144	448	305	300	546	39	297	293	481	964	134	99	157	124	141	186	374	66	362	342	415	444	1216	446	354	251	249	149	84	30	620	616	1055	62	30	25	617	328	653	214
FUCA1	431	396	557	379	215	205	690	551	63	135	476	417	380	264	25	166	364	606	1358	57	82	143	171	185	285	559	59	270	223	325	360	878	508	383	336	158	119	148	28	478	475	907	53	14	15	472	268	553	213
CNR2	0	0	0	0	0	0	0	0	0	0	0	0	0	0	0	0	0	0	0	0	0	0	0	0	0	0	0	0	0	0	0	0	0	0	0	0	0	2	0	0	0	1	0	0	0	0	0	1	0
MIR378F	0	0	0	0	0	0	0	0	0	0	0	0	0	0	0	0	0	0	0	0	0	0	0	0	0	0	0	0	0	0	0	0	0	0	0	0	0	0	0	0	0	0	0	0	0	0	0	0	0
PNRC2	168	117	166	271	119	97	135	114	47	92	237	211	201	394	33	174	53	73	232	13	57	98	294	285	539	1137	32	201	180	134	142	448	316	228	151	29	21	99	35	211	202	397	200	58	53	195	68	156	183
SRSF10	759	649	1220	973	517	416	433	389	199	441	822	770	776	776	52	402	220	333	822	33	241	402	295	327	561	1171	88	432	339	634	722	2007	1442	1078	816	164	92	475	90	589	489	954	215	55	40	419	237	412	499
MYOM3	27	22	38	658	358	336	232	178	63	85	556	490	499	154	15	83	33	53	113	45	127	255	6	6	16	21	70	264	246	26	16	96	671	687	486	49	50	99	15	497	602	1072	10	4	3	48	23	59	267
IL22RA1	38	49	79	116	62	38	161	131	15	31	124	121	118	16	0	6	14	41	101	19	30	63	33	30	16	34	3	23	21	44	54	106	138	121	105	77	82	34	7	47	84	143	4	0	1	120	67	137	126
IFNLR1	198	152	211	101	62	46	52	64	24	24	84	64	64	36	4	14	45	64	187	2	23	52	106	99	75	163	7	31	28	137	141	450	119	109	89	34	22	12	7	93	96	162	18	7	1	144	63	144	93
LOC284632	0	0	0	1	0	0	5	0	1	2	2	2	1	1	0	0	0	0	0	3	1	3	0	1	0	0	0	0	1	0	1	0	2	0	1	1	0	0	0	2	0	2	0	0	0	0	1	0	0
GRHL3	788	863	1076	24	12	4	106	44	2	9	6	13	16	59	6	43	14	42	81	0	3	9	367	380	384	712	9	35	28	681	637	1935	27	18	24	3	3	7	2	9	9	10	26	5	4	39	11	36	0
STPG1	316	352	499	210	107	82	170	145	63	92	205	218	159	194	14	133	95	208	453	24	55	88	177	150	185	328	22	95	93	281	300	869	259	223	168	50	45	113	17	425	399	749	13	5	7	393	190	366	231
NIPAL3	1878	1645	2783	419	223	179	430	346	104	203	377	362	381	456	34	275	323	494	1527	37	99	227	571	523	614	1094	49	261	227	1661	1761	4790	510	391	305	103	78	137	53	456	614	813	32	10	16	628	324	585	316
RCAN3AS	1	1	2	0	3	0	6	3	0	0	5	4	1	0	0	7	0	5	9	0	1	2	0	0	2	0	0	0	0	4	0	2	1	1	1	3	1	3	0	6	7	11	1	0	0	3	3	6	0
RCAN3	228	174	336	306	173	159	245	177	66	132	310	328	263	178	20	130	108	161	421	32	74	135	92	105	125	255	16	114	101	174	155	498	464	306	213	72	39	199	42	377	477	771	37	12	5	255	170	246	165
NCMAP	1	6	7	10	7	4	24	37	0	1	21	20	21	0	0	0	711	1175	2863	4	7	19	0	0	0	0	0	11	11	5	7	8	18	16	16	4	10	2	0	33	23	33	0	0	0	1188	678	1247	4
SRRM1	2470	2157	3393	1400	737	598	758	709	397	861	1407	1401	1430	948	102	569	471	649	1893	65	444	815	346	318	394	835	146	671	504	2159	2259	6635	1901	1562	1075	218	145	946	178	971	992	1880	322	79	75	824	498	848	868
CLIC4	1154	1101	2554	1558	822	487	512	500	304	629	1321	1445	1379	1119	134	761	501	464	1647	20	373	815	441	444	770	1900	225	1215	988	1091	1222	3392	2721	1450	1124	155	86	983	166	2929	4037	6237	313	86	59	2070	1073	1612	1981
RUNX3	40	33	34	209	110	77	356	273	60	102	198	177	155	59	6	43	3	14	20	17	51	84	15	26	23	44	11	55	38	42	33	100	213	252	169	118	80	75	30	142	170	322	16	5	2	17	8	22	98
SYF2	1330	1209	2008	612	387	260	1071	1203	197	579	667	687	727	861	71	461	295	511	996	113	171	346	238	254	383	676	115	543	395	1037	1127	3000	1091	725	452	389	170	752	92	742	963	1657	282	57	58	563	387	598	599
RHD	2	1	0	0	0	0	0	0	0	0	0	0	0	0	0	0	0	0	0	0	0	0	2	0	0	0	0	0	0	0	0	0	0	0	0	0	0	0	0	0	0	0	0	0	0	0	0	0	0
TMEM50A	1098	1695	1911	1713	916	700	2475	2238	320	812	1880	1627	1553	1387	121	843	926	1544	3283	169	480	905	580	654	894	1665	218	982	816	1643	1011	2711	2499	1840	1430	1411	628	690	169	1889	2246	3794	264	55	69	2256	1198	1874	1352
RHCE	1	3	0	0	0	0	3	2	0	0	2	0	0	0	0	0	7	5	11	2	0	0	0	1	0	1	0	4	1	1	2	7	0	0	0	0	0	1	0	2	1	8	0	0	0	19	10	20	0
LDLRAP1	646	569	881	479	292	218	450	378	70	158	518	453	434	168	16	117	95	220	492	104	146	262	323	314	341	634	22	143	108	595	440	1397	548	569	402	158	114	96	48	246	237	472	56	10	8	165	96	202	192
MAN1C1	24	24	31	25	17	12	60	39	5	9	27	21	24	10	1	4	0	5	15	3	11	9	2	2	3	2	2	13	9	7	13	30	31	27	16	6	3	10	3	10	21	44	4	0	1	1	1	1	4
MTFR1L	390	402	566	401	251	229	533	441	86	201	593	525	504	618	62	489	164	287	621	104	135	233	127	142	164	268	71	257	220	374	386	980	543	506	343	190	94	160	68	423	469	791	125	40	40	225	126	219	301
LOC646471	3	10	0	21	12	15	31	33	4	7	1	1	0	0	0	0	0	0	2	0	1	1	13	11	28	47	2	18	24	4	8	16	32	26	20	12	8	7	1	2	0	0	0	0	0	2	0	2	0
AUNIP	89	53	64	147	88	82	77	54	42	61	139	146	142	27	2	11	80	131	297	23	44	64	53	51	49	115	5	34	18	63	56	186	236	205	131	12	4	69	19	111	80	208	7	4	3	125	55	118	55
PAQR7	2205	2284	3071	112	81	43	257	216	27	60	122	98	92	114	13	82	170	316	714	22	40	60	440	441	521	883	15	77	56	2165	1908	5417	150	152	96	59	33	23	7	94	119	180	39	14	8	438	273	493	27
STMN1	825	665	1159	3235	1683	1342	2117	1690	804	1727	3689	3520	2961	696	56	388	2616	4344	8655	418	885	1389	445	420	453	830	124	665	513	626	738	2255	5102	3417	2437	341	247	2873	458	2139	2308	4468	115	31	28	2923	1659	2639	975
MIR3917	0	0	0	0	0	0	0	0	0	0	0	0	0	0	0	0	0	0	0	0	0	0	0	0	0	0	0	0	0	0	0	0	0	0	0	0	0	0	0	0	0	0	0	0	0	0	0	0	0
PAFAH2	655	573	929	342	200	185	480	388	86	170	377	347	294	574	48	390	105	192	479	19	105	193	171	157	181	377	44	273	209	537	542	1700	453	375	288	101	74	114	29	378	366	758	122	29	43	278	144	263	247
EXTL1	0	2	1	4	1	2	9	3	0	1	2	0	3	1	0	0	0	0	0	0	0	0	0	0	0	1	0	2	0	0	0	3	4	5	5	1	0	1	0	0	0	0	0	0	0	1	0	0	0
SLC30A2	1	3	3	0	1	0	0	0	0	0	1	0	0	0	0	0	0	0	6	0	0	0	0	0	0	0	0	1	1	1	0	4	0	0	0	0	0	0	0	0	0	1	0	0	0	2	0	4	0
TRIM63	0	0	0	0	0	0	0	0	0	0	0	0	0	0	0	0	0	1	1	0	0	0	0	0	0	0	1	0	0	0	0	0	0	0	0	0	0	0	0	0	0	0	2	0	0	0	0	0	0
PDIK1L	24	19	57	76	46	33	38	68	19	49	77	82	108	83	10	66	52	64	186	3	26	70	11	12	30	53	12	73	40	16	12	48	148	87	57	8	1	78	10	170	196	309	53	10	6	132	70	146	66
FAM110D	0	0	0	0	0	0	3	1	0	0	0	2	2	0	0	0	0	3	0	0	0	1	0	0	0	0	0	0	0	0	0	0	1	0	0	0	0	0	0	0	1	0	0	0	0	0	2	0	0
ZNF593	94	92	147	413	214	203	924	639	79	178	456	359	317	258	18	178	95	282	540	572	123	151	144	181	252	430	16	91	66	103	82	233	479	425	360	350	178	91	28	269	218	466	77	24	17	158	74	214	156
CNKSR1	334	360	495	7	3	6	10	16	2	1	14	5	8	3	0	5	94	164	376	3	3	2	217	241	206	445	1	1	0	419	284	874	5	6	5	3	5	9	1	12	5	19	3	1	1	306	133	298	2
CATSPER4	1	3	0	0	0	0	0	0	0	0	0	0	0	0	0	0	0	0	0	0	0	0	1	0	0	0	0	0	0	0	0	0	0	0	0	0	0	0	0	0	0	0	0	0	0	0	0	0	0
CEP85	246	222	318	719	396	361	465	366	176	290	722	705	597	399	35	303	210	377	987	19	173	324	123	115	102	201	30	158	115	200	221	587	826	789	586	134	87	275	65	488	509	928	80	29	30	417	217	425	346
SH3BGRL3	10137	9136	13589	1035	550	465	2443	1449	166	315	756	893	780	1331	159	926	965	2245	3869	986	275	472	5215	5843	5138	9370	198	943	802	9981	9049	30442	1238	1227	857	1150	592	440	115	572	846	1543	134	40	38	2140	1138	2089	1589
UBXN11	44	50	53	307	220	108	712	473	72	90	356	306	267	437	24	318	112	223	521	197	77	120	43	57	57	73	29	151	136	49	31	114	304	334	232	112	99	84	17	92	135	294	87	15	22	126	52	157	96
CD52	0	1	0	0	0	0	0	0	0	0	0	0	0	0	0	0	0	1	0	0	0	0	0	0	0	1	0	4	0	0	0	0	0	0	0	0	0	0	0	0	0	0	0	0	0	0	0	1	0
ZNF683	0	0	0	0	0	0	0	0	0	0	0	0	0	0	0	0	0	0	0	0	0	0	0	0	0	0	0	0	0	0	0	0	0	0	0	0	0	0	0	0	0	0	0	0	0	0	0	0	0
LIN28A	0	0	0	1	0	1	3	1	0	0	2	0	0	0	0	0	0	0	0	0	0	0	0	0	0	0	0	0	0	0	0	0	0	0	1	0	0	0	0	0	0	5	1	0	0	0	0	0	0
DHDDS	576	568	900	482	282	216	409	321	78	177	461	455	398	520	43	351	180	333	721	95	142	192	256	242	269	542	48	241	201	587	601	1814	481	469	331	118	88	124	49	481	430	926	90	27	32	363	173	355	394
HMGN2	334	244	448	2424	1443	1210	2309	1740	632	1374	1973	1967	2038	311	29	209	1092	1956	4045	280	787	1184	476	514	436	787	52	279	236	317	277	829	3053	2424	1794	585	250	1632	337	1363	1419	2666	298	64	49	1290	790	1257	734
RPS6KA1	1100	894	1374	748	477	390	693	506	154	259	632	655	553	979	87	771	337	625	1360	236	200	348	564	552	676	1232	91	439	350	1100	1001	2793	848	805	602	183	135	211	105	477	549	919	258	65	49	583	252	644	327
MIR1976	0	0	0	0	0	0	0	0	0	0	0	0	0	0	0	0	0	0	0	0	0	0	0	0	0	0	0	0	0	0	0	0	0	0	0	0	0	0	0	0	0	0	0	0	0	0	0	0	0
ARID1A	2240	2015	3142	2005	1058	829	925	799	387	725	1794	1917	1800	1252	140	810	358	494	1600	63	590	918	619	600	398	816	136	529	413	2042	1915	5657	2085	1950	1427	288	182	589	153	1296	1420	2566	369	112	83	1153	589	1356	920
PIGV	130	128	173	358	224	133	370	334	74	156	363	343	270	235	15	160	92	208	459	37	86	178	66	61	71	142	39	112	114	113	139	304	476	418	277	105	79	97	43	429	461	773	48	11	8	251	133	240	131
ZDHHC18	275	288	351	760	486	381	453	421	144	248	774	697	618	780	73	622	250	516	1115	92	196	313	202	200	203	390	118	543	404	262	250	778	806	786	569	109	85	87	50	629	668	1198	184	54	42	487	259	522	930
SFN	12382	12281	17852	2611	1499	1123	2338	1576	381	813	1905	1829	1647	4070	418	3167	923	2257	4271	1107	692	1034	10617	11111	13986	24336	267	1195	1019	15011	10503	34044	2456	2445	1754	539	504	789	182	961	940	2222	544	158	118	1687	700	1733	1813
GPN2	168	157	243	383	187	167	236	194	56	130	382	357	280	326	27	255	119	301	629	108	96	144	108	93	165	277	35	174	109	187	144	580	416	388	277	69	45	103	32	212	216	436	98	35	15	300	138	365	187
GPATCH3	160	151	253	207	108	108	190	145	33	91	224	195	205	299	29	166	63	131	279	97	77	92	83	64	112	245	28	128	92	161	136	394	201	231	160	51	37	34	21	134	136	269	66	12	20	117	46	135	131
NR0B2	0	0	0	0	0	0	0	0	0	0	0	1	0	5	1	11	0	0	1	0	0	0	0	0	0	1	0	0	0	0	0	0	1	0	0	0	0	0	0	0	0	0	1	0	0	0	0	0	0
NUDC	1633	1368	2238	2632	1589	1323	2866	1885	577	1233	2751	2606	2820	3040	277	1916	1473	3595	6241	2697	865	1389	1011	954	1207	2100	411	1910	1546	1671	1496	4614	3115	2956	2316	877	582	1335	238	1292	1064	2314	455	117	101	1443	788	1403	2845
TRNP1	810	739	1280	2818	1600	1210	2710	2536	668	1351	2149	1906	1810	4132	369	2927	2128	4160	8179	604	686	1031	416	441	625	1264	297	1327	1229	589	635	2187	3164	2905	2185	1177	643	943	329	1476	1826	3006	444	166	149	1562	1115	2307	1145
SLC9A1	1220	1161	1660	356	197	144	399	343	57	130	366	355	316	836	72	616	163	321	866	60	129	242	559	601	461	957	115	469	331	1269	1055	3267	372	374	275	140	112	85	27	469	515	943	176	42	42	514	279	572	503
WDTC1	693	675	1036	512	332	223	474	346	113	148	569	527	411	231	19	227	189	311	728	46	132	275	307	290	255	470	36	202	130	715	605	1671	551	509	405	130	88	73	29	391	508	792	47	8	10	401	163	416	307
TMEM222	204	236	307	604	352	239	648	480	83	186	643	538	548	247	29	201	188	446	859	368	150	276	214	209	251	462	42	173	142	206	164	535	604	576	429	185	168	114	59	405	400	828	86	15	20	260	134	266	280
SYTL1	247	390	443	20	7	3	40	38	2	10	7	16	13	16	1	8	126	273	453	5	3	8	261	283	442	698	0	8	4	298	186	502	9	8	8	2	3	2	0	26	22	48	9	1	0	144	107	161	0
MAP3K6	396	367	483	408	212	195	577	403	55	94	285	277	226	90	14	72	80	216	463	95	80	147	257	277	325	545	18	77	51	468	313	1051	399	420	281	188	118	39	29	149	138	306	32	5	4	168	80	177	111
FCN3	0	1	0	0	0	0	6	2	2	1	0	0	0	2	0	0	0	0	0	0	0	0	0	0	0	0	0	0	0	0	0	0	1	2	6	1	0	0	0	0	0	0	0	0	0	0	0	0	0
CD164L2	31	42	30	0	0	0	0	1	0	0	0	0	0	0	0	0	0	0	0	0	0	1	10	13	17	32	0	1	1	27	18	61	0	0	0	0	0	0	1	0	0	0	0	0	0	0	0	0	0
GPR3	7	5	18	27	25	23	53	38	1	8	21	23	26	38	2	16	13	23	45	4	7	3	9	8	8	18	3	24	20	10	12	44	53	43	24	21	4	9	2	28	22	57	26	8	14	27	14	33	27
WASF2	4492	4137	6121	2084	1150	839	722	791	366	804	1779	1715	1530	1429	116	959	787	1194	3173	142	530	957	839	793	676	1413	170	845	738	3582	3700	10142	2415	2232	1535	270	187	500	141	2863	3166	4812	251	56	52	2169	1113	2181	1909
AHDC1	606	663	945	379	202	161	362	264	66	118	281	318	267	374	29	321	144	334	751	16	76	149	357	312	320	537	18	153	113	622	459	1389	395	361	278	155	79	59	30	181	257	339	165	43	31	408	216	463	162
FGR	4	1	1	0	0	0	0	1	0	0	0	0	0	0	0	0	0	0	0	0	0	0	0	1	1	1	0	2	0	2	1	6	0	2	0	0	0	0	0	0	0	0	0	0	0	0	0	1	0
IFI6	49	91	37	145	84	79	3372	2806	67	169	145	141	124	43	7	58	1495	3881	7931	168	38	91	39	14	55	47	71	334	184	207	233	912	3766	3317	2566	7484	4986	104	22	115	140	221	53	6	14	8977	4512	10363	2932
FAM76A	134	117	227	144	82	58	109	103	23	76	121	156	104	102	13	56	40	81	168	17	32	67	43	62	64	127	12	57	53	92	106	294	208	157	126	41	17	78	20	179	190	279	14	7	14	208	101	161	93
STX12	438	382	758	333	199	150	247	301	83	141	333	333	267	557	75	396	254	269	798	22	99	182	171	207	382	800	85	411	351	371	379	1223	547	348	282	56	24	253	37	376	552	864	143	53	33	751	389	756	389
PPP1R8	514	423	790	855	487	305	374	409	182	334	952	855	782	619	63	402	298	451	1227	53	256	381	251	270	383	750	89	352	292	415	382	1323	1231	906	658	83	72	367	85	905	771	1588	119	48	22	696	326	736	432
SCARNA1	0	0	0	0	0	0	0	0	0	0	0	0	0	1	0	0	0	0	0	0	0	0	0	0	0	1	0	0	0	0	0	0	0	0	0	0	0	1	0	1	1	2	2	1	0	0	0	1	0
THEMIS2	92	92	141	14	5	5	20	15	5	12	30	12	16	2	0	3	57	128	259	3	8	6	23	30	36	85	1	3	4	94	84	242	37	43	29	136	77	3	3	20	44	82	0	0	0	785	383	925	192
RPA2	401	374	757	984	515	419	470	419	194	403	1030	977	923	643	47	357	268	542	1143	147	276	406	296	284	303	551	106	477	334	355	336	978	1320	1088	771	149	100	444	89	639	636	1304	113	29	24	505	247	433	497
SMPDL3B	29	36	53	66	43	23	291	283	11	15	71	63	58	106	10	75	202	370	845	30	24	42	5	12	11	17	10	59	56	39	31	123	87	78	46	54	30	18	7	68	76	138	12	7	6	245	120	313	16
XKR8	95	87	132	178	91	75	161	133	27	53	145	157	122	69	3	49	49	98	190	16	47	73	65	62	78	108	23	65	63	100	68	261	186	163	143	55	46	13	13	103	104	218	16	7	3	83	63	127	94
EYA3	524	429	784	376	183	169	301	227	91	163	356	377	329	171	15	141	125	223	486	29	101	168	147	180	155	362	39	167	122	436	469	1317	520	387	323	73	39	167	45	332	349	588	100	26	20	342	164	356	394
PTAFR	1436	1220	1920	31	13	10	17	12	7	11	17	14	10	26	4	25	30	75	189	4	2	6	296	304	238	518	6	35	41	1582	1506	4535	35	22	18	17	14	10	2	22	58	63	7	4	3	712	351	759	49
DNAJC8	2017	1552	2846	1711	969	687	1852	1436	392	927	2029	1888	1890	2391	212	1403	734	1286	2562	437	574	951	670	719	763	1305	244	1083	928	1539	1692	4931	2807	2045	1464	632	381	1348	223	1607	1567	3012	552	129	157	1237	658	1165	1589
SESN2	368	324	502	217	121	90	302	172	63	78	176	177	136	1872	155	1362	96	194	437	32	44	83	178	204	231	417	138	894	657	380	258	962	216	188	140	31	26	59	26	560	507	997	577	161	117	487	273	623	319
MED18	543	556	684	339	176	126	352	246	73	119	321	271	257	222	13	145	142	238	500	107	72	128	104	106	190	329	30	146	121	438	497	1398	400	356	258	120	77	89	37	224	208	404	60	16	15	373	227	423	135
PHACTR4	1119	957	1642	1011	484	416	563	640	238	457	1041	1023	1026	924	100	535	330	535	1270	66	318	498	236	246	239	525	108	527	405	935	957	2810	1171	854	706	242	144	439	107	931	957	1904	266	67	74	1543	902	1573	966
SNHG3	275	288	484	650	457	285	1564	1310	214	413	1002	919	731	1582	129	1038	147	353	727	126	177	236	150	191	260	453	78	561	421	247	249	851	753	678	553	424	203	355	103	842	907	1870	399	85	77	408	186	375	186
RCC1	951	802	1337	2460	1427	1069	1803	1442	489	876	2353	2149	2026	1425	116	908	928	1768	4015	300	647	1075	496	460	558	1018	110	578	496	804	830	2247	2725	2603	1960	444	266	920	271	1667	1765	3223	245	73	80	2313	1146	2210	1084
TRNAU1AP	202	179	292	308	197	130	356	269	65	97	326	271	276	186	16	130	214	421	821	80	73	112	127	116	154	271	29	155	114	169	172	553	395	301	240	141	92	96	30	260	288	614	42	17	10	426	223	417	182
SNHG12	221	185	235	306	149	128	358	294	43	103	252	230	201	274	20	158	73	224	354	49	54	69	170	184	213	336	26	149	105	188	189	521	332	310	213	125	89	52	13	292	389	583	77	26	27	260	138	272	112
SNORD99	16	13	21	7	4	3	16	10	0	3	6	1	3	1	1	0	5	19	12	6	3	5	6	4	3	16	1	2	1	7	10	31	1	7	1	6	3	1	1	3	4	11	2	0	0	8	5	7	3
SNORA61	43	49	103	39	16	18	77	42	7	15	50	58	49	38	4	24	11	25	45	4	10	12	0	0	0	0	7	17	17	72	73	152	63	37	35	12	12	24	5	40	53	69	9	3	0	39	19	23	21
SNORA44	9	17	42	12	3	1	28	24	1	3	6	7	7	8	1	7	2	11	9	0	1	1	1	0	0	1	0	3	4	16	19	34	11	13	10	8	4	4	0	6	13	6	9	1	0	5	2	3	3
SNORA16A	5	6	12	12	13	12	12	16	0	2	10	16	10	7	1	12	0	5	10	1	0	4	2	8	20	14	1	5	6	7	4	48	14	14	13	9	0	5	0	11	23	21	10	3	2	2	1	15	12
RAB42	0	1	4	14	7	6	2	4	0	1	10	12	16	1	0	1	6	13	22	1	0	1	2	0	1	1	0	5	2	1	3	5	9	21	20	3	0	0	1	17	30	34	0	0	0	37	23	35	14
TAF12	606	468	840	318	182	118	501	401	100	250	402	401	351	268	19	141	219	421	884	28	122	180	200	225	282	556	35	161	130	459	492	1406	532	358	281	180	86	270	43	452	510	968	56	16	16	481	229	422	246
RNU11	1	0	0	2	0	0	1	5	0	0	0	1	1	3	0	6	0	4	3	4	1	0	0	0	0	0	1	3	2	0	0	3	0	3	0	0	1	1	0	1	0	3	6	5	0	0	0	38	1
GMEB1	173	202	337	179	105	87	113	109	30	71	174	178	168	170	14	96	72	100	295	18	50	114	31	44	65	165	21	91	85	158	135	651	229	174	141	34	21	68	24	163	153	288	55	13	14	260	101	264	181
YTHDF2	1097	936	1467	1136	621	516	945	803	233	443	1301	1289	1154	1099	104	697	750	1101	2863	92	264	495	468	501	700	1416	156	692	524	851	1039	2880	1604	1222	943	240	130	555	141	1260	1224	2416	422	128	127	2107	1178	2060	632
OPRD1	0	0	0	0	0	0	2	0	0	0	0	0	0	0	0	0	0	0	0	0	0	0	0	0	0	0	0	0	0	0	0	0	0	0	0	0	0	0	0	0	0	0	3	0	0	0	0	0	1
EPB41	904	800	1502	540	293	204	385	419	144	313	538	527	490	663	49	361	295	449	1167	14	156	323	154	130	112	243	69	303	220	834	812	2337	611	507	383	89	49	326	55	706	756	1269	208	35	26	672	440	672	568
TMEM200B	8	16	14	9	3	2	6	3	1	3	5	9	3	5	0	0	3	11	25	0	4	0	10	8	0	6	0	2	1	9	5	13	8	9	1	0	2	0	0	0	4	4	3	1	0	5	7	7	4
SRSF4	2068	1857	2961	1327	794	651	1919	1436	299	664	1360	1330	1269	1017	83	587	441	883	1874	65	408	622	460	511	545	929	145	664	526	1780	1871	5258	1714	1548	1228	613	378	843	161	834	933	1825	358	89	72	884	508	951	909
MECR	201	183	213	313	218	157	425	320	71	122	347	324	287	303	20	198	234	489	1079	129	88	119	141	129	216	378	32	154	151	134	164	455	408	346	304	104	82	93	16	390	342	610	64	17	12	387	202	461	92
PTPRU	901	977	1193	680	389	323	1326	1131	168	248	649	627	573	1178	102	991	577	979	2514	42	180	343	417	421	442	834	121	589	395	1053	792	2263	815	770	548	290	245	136	51	365	465	773	196	74	46	715	417	915	197
MATN1	0	0	1	7	5	0	8	2	0	2	1	2	0	1	0	1	0	0	1	0	0	1	0	0	0	0	0	1	1	1	0	0	5	3	1	0	2	2	0	4	7	7	1	0	0	0	2	3	2
MATN1-AS1	11	9	5	18	13	10	83	47	6	11	28	31	28	13	4	14	16	21	54	6	15	17	1	3	2	7	3	5	7	8	9	20	19	15	17	10	4	9	3	43	40	82	20	4	6	62	26	81	17
LAPTM5	10	6	8	2	0	1	9	5	1	2	5	2	3	25	4	17	7	8	6	0	0	0	2	1	8	3	1	19	3	5	7	12	2	1	2	3	2	5	0	8	6	11	1	0	0	17	7	12	11
MIR4420	0	0	0	0	0	0	0	0	0	0	0	0	0	0	0	0	0	0	0	0	0	0	0	0	0	0	0	0	0	0	0	0	0	0	0	0	0	0	0	0	0	0	0	0	0	0	0	0	0
SDC3	1068	920	1260	752	399	322	1034	964	118	232	759	769	707	361	33	243	365	730	1857	59	167	375	302	306	230	501	67	286	218	861	821	2394	950	797	626	241	178	66	34	584	690	1153	90	15	18	814	408	771	235
PUM1	1855	1683	2946	1737	971	784	831	741	375	833	1612	1690	1603	1509	165	933	794	940	3098	54	432	863	508	495	480	1034	203	976	766	1652	1738	5064	2197	1733	1371	235	113	953	220	1490	1657	2744	605	139	108	2334	1133	2299	1083
SNORD103B	0	0	0	0	0	0	0	0	0	0	0	0	0	0	0	0	0	0	0	0	0	0	0	0	0	0	0	0	0	0	0	0	0	0	0	0	0	0	0	0	0	0	0	0	0	0	0	0	0
SNORD103A	0	0	0	0	0	0	0	0	0	0	0	0	0	0	0	0	0	0	0	0	0	0	0	0	0	0	0	0	0	0	0	0	0	0	0	0	0	0	0	0	0	0	0	0	0	0	0	0	0
NKAIN1	4	4	2	23	19	7	14	9	5	6	26	30	24	19	6	11	0	1	2	12	9	6	0	0	2	0	9	16	14	2	1	9	32	40	28	7	10	10	2	35	38	50	10	7	4	1	1	1	7
SNRNP40	318	269	408	995	536	427	462	379	172	417	1163	1006	873	476	54	309	412	789	1761	177	269	410	200	211	243	494	54	249	204	255	285	823	1261	1062	747	145	87	397	107	513	549	998	130	29	34	547	228	484	425
ZCCHC17	1204	927	1492	512	254	183	412	318	91	209	462	404	399	438	23	246	352	627	1434	91	128	186	328	375	361	572	66	338	222	826	933	3092	729	613	352	151	94	208	30	335	362	642	77	18	19	444	248	493	361
FABP3	2	1	3	7	6	4	7	1	2	5	0	1	0	0	0	0	10	9	14	0	0	0	8	4	6	7	0	4	5	1	1	12	9	3	6	1	1	1	0	0	0	0	0	0	0	14	7	9	0
SERINC2	4751	5278	6741	947	563	380	1322	950	77	175	715	710	677	1531	165	1370	897	2120	4025	208	228	403	3540	3350	4170	7585	149	770	717	6632	3939	12456	1183	1013	797	484	311	50	40	537	837	1479	257	83	51	1889	887	2234	748
TINAGL1	8245	9228	12151	15	3	4	140	126	10	10	5	11	9	160	15	115	7677	16706	35027	1	6	2	2280	2485	3070	5413	2	3	6	8925	7327	20970	9	11	11	43	48	3	2	8	17	30	18	5	2	18183	10488	21836	3
HCRTR1	0	0	0	0	2	0	0	1	0	0	2	0	0	3	0	2	0	1	0	0	0	0	0	0	0	1	0	1	2	0	0	0	1	1	1	0	0	0	0	0	1	0	3	1	1	1	0	0	0
PEF1	663	569	976	1395	825	563	1269	860	239	457	1268	1160	914	1278	100	838	659	1427	2967	600	331	536	441	446	653	1098	147	690	603	596	567	1921	1585	1398	1039	368	269	229	111	804	854	1491	167	48	37	1205	598	1218	690
COL16A1	1252	1447	1942	335	205	159	1077	678	44	65	203	209	202	266	16	149	21	66	132	42	61	71	727	700	931	1609	10	48	59	1647	1132	3187	341	369	247	452	307	46	14	289	311	715	99	15	25	241	108	254	64
MIR4254	0	0	0	1	0	0	0	0	0	0	0	1	0	0	0	0	0	0	0	0	0	0	0	0	0	0	0	0	0	0	0	0	0	0	0	0	0	0	0	0	5	0	0	0	0	0	0	0	0
SPOCD1	52	68	65	66	35	24	67	57	3	8	51	60	47	85	6	66	71	124	220	14	5	23	45	34	21	51	3	34	38	56	31	113	74	71	55	35	16	4	3	139	153	232	8	1	1	196	130	237	189
PTP4A2	1405	1251	2381	3985	2182	1650	2934	3001	877	2023	3953	4078	3556	2885	336	2050	3272	4679	12106	510	1050	1934	557	593	813	1657	448	2106	1713	1135	1491	4151	5933	4660	3080	1175	695	3016	593	4286	5278	8852	892	233	243	6189	3916	6492	3031
KHDRBS1	1938	1754	2911	3960	2236	1768	2926	2602	923	1630	3608	3619	3528	2423	222	1455	1627	2572	5744	327	924	1748	767	826	1276	2412	382	1892	1472	1695	1711	5057	5097	4037	3209	642	410	1767	358	3506	4378	7448	349	127	110	3372	1940	3499	2812
TMEM39B	76	77	92	232	145	109	294	233	50	80	283	240	226	55	7	50	113	217	489	52	68	97	61	49	64	111	12	48	34	107	68	225	278	289	184	85	69	55	27	229	285	477	20	5	2	208	90	220	116
KPNA6	1868	1697	2962	1545	826	677	1223	1067	389	760	1536	1338	1283	1773	187	1189	781	1292	3014	160	385	785	557	626	488	1043	207	949	695	1588	1659	4924	1949	1579	1304	331	214	543	178	1452	1428	2382	431	117	114	1678	943	1551	1187
TXLNA	1125	1109	1503	2109	1179	901	1296	1172	402	709	1879	1858	1584	1983	203	1281	715	1269	2984	193	489	893	352	368	417	851	202	892	742	1000	925	3072	2309	2064	1606	348	252	531	135	1593	1513	2780	551	146	147	1483	798	1502	1667
CCDC28B	23	29	30	26	20	18	142	112	8	17	33	21	23	18	3	11	94	167	303	30	9	11	21	30	25	44	3	13	14	29	22	79	42	39	34	50	32	4	0	23	19	34	4	4	2	93	57	128	7
IQCC	44	31	50	100	64	53	121	79	7	21	65	67	56	14	1	13	63	150	277	14	15	21	25	17	25	32	6	26	18	30	30	115	115	107	81	33	22	26	7	45	53	76	7	2	1	116	65	126	5
DCDC2B	0	1	1	43	17	10	100	53	4	6	2	2	0	0	0	2	0	1	0	0	2	0	6	6	9	16	2	10	9	1	0	2	33	18	18	14	9	5	0	0	0	0	0	0	0	0	0	0	0
TMEM234	84	79	131	114	59	46	174	121	13	33	106	86	78	139	11	96	111	174	365	31	15	35	54	67	77	148	8	34	43	81	81	281	101	104	72	37	32	16	9	51	60	144	28	7	6	97	60	123	48
EIF3I	2979	2362	3986	4340	2577	2006	5626	4000	730	1516	3690	3333	3080	1598	139	1056	1636	3337	6919	1531	951	1416	1609	1719	2166	3757	235	1157	932	2755	2626	8608	5248	4787	3468	1804	1218	1730	544	3382	3042	5686	233	55	70	2765	1304	2853	2217
MTMR9LP	3	8	3	119	67	55	199	197	16	25	122	102	82	103	10	74	14	39	52	11	11	18	4	2	3	6	3	19	21	5	4	11	120	116	93	92	41	8	6	49	87	170	19	1	4	21	4	24	23
FAM167B	4	9	4	38	21	18	115	70	5	9	26	30	36	17	1	6	10	13	19	29	8	17	1	1	1	2	1	10	2	1	3	1	49	31	41	35	15	5	0	34	44	77	7	1	0	12	12	14	12
LCK	4	3	4	0	1	0	0	0	0	0	0	0	0	0	0	2	11	29	95	0	0	0	1	0	2	0	0	2	0	0	2	8	0	0	0	0	0	4	1	0	0	0	1	0	0	38	23	28	0
HDAC1	2041	1805	2958	2323	1403	1121	2708	2197	448	926	2278	2168	2120	1890	134	1291	1540	2909	6306	295	609	910	806	818	940	1783	230	1117	893	1754	1744	5334	3119	2609	1952	704	393	1158	306	1875	1855	3422	304	82	73	1888	1031	1902	1298
MARCKSL1	949	850	1282	1538	1016	734	3057	2371	229	482	2398	2194	1937	1021	115	806	1874	3815	8055	307	536	891	540	603	486	942	132	654	538	1016	904	2898	1790	1641	1291	960	537	238	133	1165	1289	2366	146	56	58	3578	1922	4127	544
FAM229A	0	2	0	37	22	13	162	128	6	6	22	33	31	33	4	38	8	35	46	29	7	8	7	3	5	8	0	4	1	0	3	5	27	35	38	66	30	0	1	12	26	39	10	7	5	6	5	14	12
TSSK3	0	0	0	110	53	48	301	263	15	21	1	1	0	3	0	3	1	2	7	0	0	1	12	6	4	12	8	37	39	1	0	0	106	86	88	114	44	27	9	3	1	0	0	0	0	4	2	5	0
BSDC1	1395	1198	1874	1007	625	504	876	732	177	304	900	779	779	1300	137	901	568	973	2096	93	272	442	414	387	492	885	108	513	419	1290	1104	3612	1095	1041	777	266	198	197	68	784	917	1506	251	73	73	1431	684	1592	800
ZBTB8B	0	0	0	4	2	0	2	0	0	0	0	0	0	1	0	0	10	11	45	0	0	0	0	0	1	0	0	1	0	2	0	0	1	0	1	0	1	0	0	0	2	2	0	0	0	3	4	10	0
ZBTB8A	62	91	106	163	74	44	118	110	23	79	141	121	116	135	14	76	27	69	172	11	35	64	24	40	52	81	14	81	76	56	61	154	204	150	131	28	12	87	14	237	266	451	24	12	5	86	55	97	79
ZBTB8OS	571	405	742	334	190	138	555	382	61	139	420	383	382	504	38	309	308	505	1020	143	95	150	120	114	228	401	63	255	207	376	493	1173	547	398	256	197	102	290	49	397	339	777	100	30	29	512	238	433	275
RBBP4	933	845	1614	1713	847	700	1154	1180	306	680	2311	2109	2045	1879	151	1079	1524	2185	5247	114	581	1054	296	365	444	795	195	812	636	766	790	2287	2480	1841	1335	293	185	837	175	2221	2190	3909	394	113	109	2162	1291	1963	1388
SYNC	367	293	585	188	113	99	20	28	21	36	287	268	244	353	32	209	2	10	4	26	71	133	32	29	38	76	13	62	51	297	289	818	184	196	164	19	14	22	9	342	412	757	42	14	16	7	1	10	193
KIAA1522	3930	3730	5621	2450	1370	1088	2322	2013	377	688	2008	1938	1723	1793	198	1307	1699	2980	7121	300	638	1113	1164	1134	1094	2240	143	704	632	3613	3087	9280	2505	2531	1884	570	400	242	125	1303	1714	2823	392	115	83	3963	2238	4648	1097
YARS	2112	1673	2593	2022	1098	925	1162	946	453	918	1819	1724	1696	2409	198	1608	885	1606	3503	497	525	908	747	730	774	1669	265	1429	1073	1627	1740	4969	2357	2191	1598	465	370	798	250	4579	3281	7291	424	84	104	4467	2135	4045	2105
S100PBP	288	247	425	536	255	187	418	501	119	216	524	563	505	371	24	231	164	237	594	56	146	260	108	86	115	244	31	236	170	203	229	599	842	548	457	189	78	288	74	711	743	1238	86	17	21	482	259	463	286
FNDC5	0	0	1	3	5	7	4	9	2	3	9	6	5	3	0	2	0	0	7	2	1	2	0	1	0	2	0	7	2	0	0	0	15	8	7	5	0	9	0	5	3	1	0	2	1	1	2	4	0
HPCA	1	6	0	0	0	0	7	14	1	1	0	2	4	2	1	1	3	6	9	2	1	2	0	2	0	0	0	2	2	2	1	5	8	4	3	3	3	0	1	1	4	10	1	0	0	2	0	3	1
TMEM54	415	470	643	731	449	292	641	461	95	181	553	543	472	218	35	187	632	1431	2738	513	162	253	396	455	550	968	32	131	135	493	278	1004	765	766	573	210	166	101	46	414	571	929	36	10	5	1008	526	1372	273
RNF19B	406	296	579	578	301	225	183	174	88	189	519	438	377	684	62	477	175	325	791	46	149	218	138	117	147	310	59	363	271	380	361	1054	632	565	389	127	112	304	62	769	835	1580	198	55	70	1273	787	1635	1105
AK2	2918	2175	3270	2446	1360	1091	2314	1860	422	938	2518	2411	2226	2177	208	1351	1731	3014	6903	602	736	1190	929	952	1205	2197	348	1596	1335	2296	2433	6839	3368	2729	2018	969	516	1016	242	2151	2257	4265	283	96	82	1894	1041	1851	2130
TRIM62	115	133	184	74	41	23	65	64	9	34	76	75	56	36	1	36	66	101	298	5	25	51	64	65	65	138	7	23	14	157	101	329	84	64	51	24	20	14	7	60	42	102	6	5	8	83	66	125	66
ZNF362	145	146	198	395	217	178	739	552	71	169	385	417	409	105	11	97	107	241	565	54	107	223	56	71	27	49	19	86	66	129	87	266	387	386	284	218	128	91	35	332	322	665	33	5	8	167	105	193	94
PHC2	769	701	1054	1341	769	648	1213	1043	244	386	1203	1070	959	335	39	296	534	1092	2468	303	295	413	603	598	596	1130	60	325	275	744	678	2143	1409	1338	1082	466	364	315	117	1292	1385	2596	185	36	17	1478	832	1701	1100
MIR3605	0	0	1	3	1	0	0	1	0	0	1	0	4	0	0	0	0	0	0	0	0	1	0	0	1	0	0	0	0	0	0	4	0	0	0	1	0	0	0	2	0	1	0	0	0	0	2	0	1
ZSCAN20	111	116	208	99	66	52	88	67	20	39	103	90	81	108	12	54	43	58	206	4	24	45	16	11	22	36	19	72	55	103	94	338	118	115	64	27	11	34	12	111	99	183	49	9	6	122	58	136	68
CSMD2	0	0	0	0	1	0	0	0	0	0	0	2	1	0	0	0	0	0	0	0	0	0	0	0	0	0	0	1	2	1	2	2	0	0	0	0	0	1	0	0	0	0	0	0	0	0	0	0	2
HMGB4	0	0	0	0	0	0	0	0	0	0	0	0	0	0	0	0	0	0	0	0	0	0	0	0	0	0	0	0	0	0	0	0	0	0	0	0	0	0	0	0	0	0	0	0	0	0	0	0	0
C1orf94	0	0	0	0	0	0	0	0	0	0	0	0	0	0	0	0	0	0	0	0	0	0	0	0	0	0	0	0	0	0	0	0	0	0	0	0	0	0	0	1	0	1	0	0	0	0	0	0	0
GJB5	691	668	997	2	1	4	3	1	1	2	0	2	0	8	0	9	6	15	29	1	0	1	456	516	660	1175	2	7	3	626	618	1982	4	2	4	0	0	1	2	1	0	0	0	1	0	23	15	18	0
GJB4	251	221	361	5	1	0	1	2	0	3	2	0	0	33	8	17	55	102	240	1	2	1	151	165	179	355	1	5	6	305	259	798	3	5	4	0	0	2	1	1	0	0	0	0	0	275	142	274	1
GJB3	1078	964	1560	22	15	5	1	0	0	1	9	7	7	14	2	20	303	667	1334	4	2	3	1180	1326	1545	3119	2	7	10	1262	1046	3643	19	19	26	1	0	4	2	7	12	32	1	1	1	1312	653	1388	16
GJA4	0	0	0	0	0	0	0	1	0	0	0	0	1	0	0	0	0	0	0	0	0	0	0	2	0	0	0	0	0	0	1	0	0	0	1	0	0	0	0	0	0	0	0	0	0	0	2	1	0
SMIM12	609	520	903	699	408	326	380	380	97	181	667	555	608	527	49	398	251	560	1134	236	145	293	250	238	347	659	70	291	261	579	641	1796	758	735	522	131	93	218	72	415	389	874	124	37	37	673	339	592	383
DLGAP3	0	0	1	4	1	1	11	6	0	2	2	3	4	0	0	0	8	13	32	1	1	1	0	1	1	1	0	1	1	0	1	0	3	4	1	7	0	1	0	2	5	12	0	0	0	34	8	23	3
LOC653160	20	28	32	29	15	11	43	45	5	14	29	30	30	30	4	18	28	35	60	6	8	10	4	4	2	6	3	9	9	12	20	52	46	42	14	26	16	13	4	23	23	65	10	3	0	45	21	30	13
ZMYM6	455	504	873	231	110	94	265	241	59	133	223	237	208	157	24	83	145	162	480	5	72	109	105	136	186	425	12	72	71	393	382	1060	335	256	166	94	30	179	22	267	348	547	46	13	6	265	155	281	124
ZMYM1	96	97	219	254	129	71	95	120	54	118	260	272	256	193	17	73	117	104	368	3	63	179	59	50	158	307	23	112	88	78	88	250	391	227	172	18	8	217	31	346	450	599	48	10	12	277	136	222	112
SFPQ	4192	3502	5775	5904	3067	2576	4456	3373	1461	3122	6731	6760	7539	4375	461	2583	2115	3244	8098	387	1967	3431	1218	1287	1755	3377	538	2481	1910	3012	3518	9571	7595	6356	4834	1488	709	3110	658	3577	3999	7478	1067	377	290	3412	1997	3434	4011
ZMYM4	1201	1076	1854	1117	570	413	666	665	237	527	1093	1182	1041	808	72	439	435	538	1677	38	321	546	217	231	274	597	127	617	415	888	1078	2852	1689	1160	944	185	90	683	113	1373	1725	2587	219	53	67	1072	581	1061	871
KIAA0319L	888	797	1170	1182	716	517	1400	1213	249	406	1140	1050	945	1401	131	988	707	1137	3032	131	252	492	253	311	255	485	175	890	699	672	699	2155	1386	1317	1025	431	292	279	90	1101	1437	2453	253	66	60	1518	734	1544	612
NCDN	329	339	510	510	308	209	461	361	98	169	519	445	460	665	80	462	249	533	1240	64	123	223	262	240	330	697	47	243	161	389	263	905	532	514	404	98	80	42	37	243	282	484	130	63	42	446	239	503	248
TFAP2E	1	2	9	8	8	6	37	25	1	2	5	6	16	7	0	6	2	9	4	1	5	3	2	6	11	14	3	6	2	6	7	9	9	11	9	8	11	4	1	4	6	13	11	0	0	1	2	1	2
PSMB2	2672	2149	3154	2674	1434	984	2596	2063	570	1196	3077	2957	2641	3091	293	2069	2392	4839	10014	1208	827	1429	1225	1305	1430	2639	468	1964	1648	2144	2108	6735	3816	3000	1919	939	569	1124	342	2071	1998	4062	433	112	129	4119	2114	4071	2113
C1orf216	127	131	191	598	310	239	381	290	103	199	622	488	474	391	24	228	177	336	730	92	123	215	65	64	80	146	41	148	127	108	91	294	660	595	390	91	86	132	49	386	321	657	87	20	23	306	135	309	209
CLSPN	207	176	292	922	572	428	298	272	199	461	732	782	822	54	7	28	182	304	854	53	225	361	86	106	54	121	23	138	62	160	177	582	1284	1029	838	48	54	551	126	325	262	519	6	4	8	418	214	379	292
AGO4	401	325	570	257	141	112	188	226	67	138	248	219	201	332	30	181	112	149	460	6	69	92	101	84	76	173	38	205	168	274	304	893	329	264	221	80	48	113	14	368	517	775	67	14	26	378	228	333	191
AGO1	338	323	490	570	301	253	216	243	137	235	565	623	543	312	31	226	258	393	1113	50	191	331	90	82	77	144	37	169	110	296	267	893	661	536	434	78	41	166	53	524	528	869	72	17	16	426	239	474	357
AGO3	138	143	250	169	70	80	94	59	39	81	152	145	138	136	10	101	48	91	304	7	41	70	26	24	38	79	20	86	60	115	147	394	173	157	120	26	16	89	7	168	215	285	29	11	10	149	60	157	170
TEKT2	0	4	2	1	3	3	0	0	0	0	0	0	1	1	0	0	0	3	1	0	0	0	1	0	0	1	1	1	2	0	0	3	1	3	2	1	1	0	0	0	1	0	3	0	0	0	2	1	0
ADPRHL2	641	615	762	616	347	291	655	406	99	161	554	468	402	676	71	478	332	578	1382	140	162	226	265	301	435	788	82	361	324	660	586	1652	695	666	483	257	205	80	34	361	320	582	197	40	32	976	532	1073	393
COL8A2	9	11	15	15	3	5	0	3	0	1	8	6	1	0	0	0	4	13	30	1	0	5	7	10	17	28	1	1	3	13	8	27	6	15	5	0	0	1	1	20	16	26	0	0	0	14	8	23	2
TRAPPC3	898	855	1325	1114	572	447	1216	1086	175	365	1179	1001	1103	1221	112	807	591	1408	2697	410	346	532	486	563	726	1353	97	513	433	727	740	2489	1415	1207	922	502	320	345	110	987	917	1746	217	58	52	1417	727	1446	749
MAP7D1	1951	1979	3033	2486	1352	1093	1723	1322	383	684	2022	2169	2078	1593	165	1225	813	1825	3690	390	611	958	1796	1787	2572	4702	135	650	511	2525	1793	5999	2408	2684	2001	550	428	458	152	1325	1412	2944	250	96	74	2201	1087	2636	1918
THRAP3	4587	3771	6348	3335	1937	1603	2320	1948	762	1631	3721	3446	3559	2674	229	1541	944	1425	3778	183	939	1709	973	1009	913	1829	341	1636	1234	3732	3958	11650	4384	3758	2855	679	496	1545	313	3182	3130	5884	695	144	173	1684	992	1724	2086
SH3D21	313	373	505	44	23	13	44	49	2	10	35	30	30	25	2	16	36	48	163	4	6	15	126	136	171	350	5	52	32	360	345	1100	51	53	36	23	16	12	1	32	134	203	2	2	2	59	50	94	67
EVA1B	8	12	8	272	165	105	267	259	50	101	156	127	120	58	8	58	86	173	366	209	51	52	83	102	130	297	6	18	21	9	0	20	285	254	227	139	78	11	15	125	173	219	15	9	4	146	115	260	72
STK40	178	199	278	332	165	123	239	190	58	111	318	299	253	644	55	433	366	749	1710	53	84	113	107	99	154	254	41	218	164	225	196	588	271	278	227	71	40	59	33	195	282	503	170	39	33	1285	670	1556	464
LSM10	168	183	221	429	255	168	535	354	62	164	490	408	412	442	46	397	260	606	1141	286	153	214	127	127	182	339	39	192	184	151	98	401	517	460	311	208	132	168	45	242	257	527	71	19	21	431	185	457	281
OSCP1	67	74	104	78	42	46	222	154	20	41	108	61	84	89	5	46	24	39	85	29	19	39	38	29	36	54	17	66	36	76	73	206	105	104	66	48	42	38	8	68	97	173	22	7	3	49	23	32	34
MRPS15	1432	1208	2029	1319	742	602	2523	1625	270	582	1384	1083	1029	1367	103	894	763	1461	2671	706	341	545	704	749	923	1753	133	550	476	1092	1190	3797	1697	1429	1073	910	455	550	170	740	792	1690	225	71	61	809	512	840	694
CSF3R	0	0	0	0	0	0	3	0	0	0	0	0	0	0	0	0	0	0	0	0	0	0	0	0	0	0	0	2	0	0	0	0	0	0	0	0	0	0	0	0	0	0	0	0	0	0	0	0	0
GRIK3	0	0	0	0	0	0	0	0	0	0	0	0	0	0	0	0	0	0	0	0	0	0	0	0	0	0	0	0	0	1	1	0	0	0	1	0	0	0	0	0	1	0	0	0	0	0	0	0	0
MIR4255	0	0	0	0	0	0	0	0	0	0	0	0	0	0	0	0	0	0	0	0	0	0	0	0	0	0	0	0	0	0	0	0	0	0	0	0	0	0	0	0	0	0	0	0	0	0	0	0	0
ZC3H12A	337	371	482	1217	753	525	4526	3515	118	225	1375	1325	1175	472	48	360	505	1248	2960	66	282	483	192	165	302	501	58	326	246	1175	867	2618	1680	1615	1221	2603	1612	153	50	1252	1352	2794	690	173	112	4431	2247	4958	2628
MEAF6	416	439	715	622	341	293	674	619	137	303	599	549	540	398	41	253	490	747	1697	27	171	285	243	267	321	603	43	275	241	348	350	974	935	664	480	256	93	326	68	723	776	1399	137	29	40	1082	590	980	416
MIR5581	4	0	4	2	2	1	5	2	0	1	5	3	2	2	1	2	0	0	2	0	0	0	0	0	0	1	0	0	3	0	1	4	4	5	2	0	1	1	0	1	0	8	0	0	0	0	0	0	1
SNIP1	331	304	509	295	161	127	210	212	59	162	334	320	270	204	18	139	171	236	533	15	92	162	74	89	137	232	44	147	112	255	269	832	442	326	259	74	31	137	24	244	252	411	232	46	70	486	290	548	287
DNALI1	46	40	55	0	0	0	2	3	0	0	0	0	1	2	0	1	53	79	202	0	0	0	3	4	2	6	0	0	2	40	37	110	1	0	0	1	0	0	2	0	0	1	0	0	0	41	40	49	0
GNL2	1256	968	1482	975	501	457	1766	1190	163	437	1061	965	956	642	47	362	642	1118	2429	237	268	461	516	548	601	1119	88	380	305	1040	1202	3078	1548	1244	865	673	377	567	129	1111	846	1870	164	39	46	1534	888	1414	693
RSPO1	0	0	0	0	0	1	5	2	0	1	5	2	1	0	0	0	0	0	0	0	0	1	0	0	0	0	0	0	0	1	0	0	4	1	1	1	0	1	0	0	0	8	0	0	0	0	0	0	0
C1orf109	246	205	338	382	260	181	212	163	98	187	354	319	346	328	28	143	152	222	638	3	131	180	90	99	140	257	28	166	101	172	177	613	521	432	353	50	23	257	45	433	305	619	67	29	11	345	180	324	157
CDCA8	138	156	215	1097	621	549	309	275	240	466	1034	966	883	44	13	41	357	592	1647	63	303	473	162	155	112	188	13	40	34	131	103	350	1342	1200	918	51	40	431	112	525	522	1055	19	1	4	409	197	475	355
EPHA10	0	0	1	106	66	44	80	74	19	39	92	102	86	38	5	34	93	136	354	16	29	45	1	1	0	2	8	36	29	3	1	0	136	119	78	21	20	16	6	99	126	199	18	2	1	117	51	123	29
MANEAL	12	14	23	668	409	333	576	517	121	232	588	597	497	163	14	134	289	595	1414	92	204	297	15	10	14	17	32	186	131	12	11	26	776	796	592	145	117	176	63	345	383	645	48	11	8	270	164	306	156
YRDC	191	110	230	255	135	100	323	265	46	62	256	220	182	662	48	387	135	268	614	23	61	99	132	132	234	406	54	333	251	166	157	507	341	273	186	89	70	77	34	251	187	369	195	80	57	471	236	528	243
C1orf122	199	173	228	740	359	325	784	576	118	218	709	568	533	569	51	499	462	1111	1915	667	197	293	250	251	361	653	48	243	254	159	134	467	851	721	576	224	154	29	63	343	284	577	152	39	37	432	277	563	276
MTF1	581	516	896	385	178	144	275	186	88	136	355	362	338	458	44	244	148	244	732	14	111	197	199	185	193	422	58	277	221	507	509	1560	505	414	320	72	34	158	45	401	408	756	132	29	22	618	286	576	406
INPP5B	99	80	133	257	142	101	257	232	46	97	240	193	186	186	17	110	102	191	408	22	63	82	37	26	33	58	31	143	108	87	60	204	281	258	200	76	45	92	24	337	261	581	78	20	12	300	156	273	151
SF3A3	1321	1020	1719	1679	885	718	1090	976	377	810	1858	1750	1733	2204	194	1317	873	1497	3159	335	477	783	468	452	524	1016	282	1312	893	896	1038	3241	2294	1930	1476	325	210	1253	256	1667	1486	3207	412	124	119	1602	863	1509	1167
FHL3	149	126	227	128	72	48	170	145	39	50	132	121	99	57	8	57	87	218	408	50	23	46	116	139	135	272	10	33	32	147	146	464	110	133	97	76	39	28	14	125	168	301	14	4	2	349	191	471	110
POU3F1	6	5	9	0	0	0	0	0	0	0	0	0	0	0	0	0	0	0	0	0	0	0	1	1	3	3	0	0	0	3	0	5	0	0	0	0	0	0	0	0	1	0	0	0	0	1	0	0	1
MIR3659	0	0	0	0	0	0	0	0	0	0	0	0	0	0	0	0	0	0	0	0	0	0	0	0	0	0	0	0	0	0	0	0	0	0	0	0	0	0	0	0	0	0	0	0	0	0	0	0	0
RRAGC	438	519	955	588	307	207	127	218	113	205	378	415	361	692	79	414	203	375	881	22	115	247	193	196	405	841	70	359	304	387	429	1103	638	440	343	50	32	215	59	760	926	1470	239	38	46	778	429	765	574
GJA9-MYCBP	0	1	0	2	0	0	0	0	0	0	0	0	0	0	0	0	0	0	1	0	0	0	0	0	0	0	0	1	0	0	2	0	0	0	1	0	0	0	0	0	0	0	0	0	0	0	0	0	0
MYCBP	0	0	1	1	1	0	0	0	0	0	0	0	0	0	0	0	0	0	4	0	0	0	0	0	1	0	0	0	1	0	0	0	0	0	1	0	0	0	0	0	0	0	0	0	0	1	0	0	0
GJA9	0	0	0	0	0	0	0	0	0	0	0	0	0	0	0	0	0	0	0	0	0	0	0	0	0	0	0	0	0	0	0	0	0	0	0	0	0	0	0	0	0	0	0	0	0	0	0	0	0
RHBDL2	430	466	815	96	58	40	48	62	0	11	44	36	42	1	0	0	78	168	327	4	10	29	85	78	97	168	8	32	29	526	522	1527	114	89	65	18	10	3	3	76	89	179	0	0	0	324	222	302	40
AKIRIN1	1122	1065	1865	931	519	413	720	645	228	503	1008	942	874	1103	93	629	623	963	2449	34	240	430	525	567	919	1797	137	678	512	1030	1102	3136	1440	1034	869	286	172	398	72	1036	1083	1838	441	150	92	2017	1142	2010	856
NDUFS5	3102	2272	3483	2536	1278	1077	5274	2723	434	1149	2797	2344	2312	4142	345	2674	1015	2193	4224	1727	657	1066	1252	1410	1722	2942	314	1633	1342	2143	2587	7750	3587	2768	1835	1739	1056	1836	328	1670	1471	3039	610	211	204	1774	970	1732	1318
MACF1	6821	5681	9199	4166	1905	2111	2014	1749	651	1276	3286	3114	2772	4573	351	3069	2612	4231	11631	118	1033	1715	1332	1403	1253	2801	536	2335	1707	5638	6286	18324	4324	3363	3000	939	735	1727	320	4595	5535	7637	813	191	201	9413	5471	8714	4510
KIAA0754	142	126	182	593	262	259	2	14	88	182	360	323	288	514	48	339	363	221	1954	4	135	208	15	8	3	14	40	223	150	109	110	361	559	493	452	2	9	257	49	562	589	679	47	16	15	1326	551	1335	440
BMP8A	3	0	4	109	57	33	127	96	18	26	14	18	17	7	0	0	4	4	28	0	2	2	4	3	4	2	2	14	15	2	0	2	100	85	90	38	31	10	3	7	4	16	4	0	0	7	11	7	0
PPIEL	9	6	19	100	48	47	262	173	10	25	153	140	116	175	11	87	2	4	10	27	22	42	8	5	4	8	7	45	51	4	17	20	107	79	72	43	29	39	3	126	129	361	50	4	6	5	3	4	61
PABPC4	3347	2879	4759	2520	1474	1038	3035	2396	549	1126	1968	2009	1810	1677	148	1159	815	1499	3292	304	534	859	928	993	1249	2429	243	1213	979	2723	2843	8193	2762	2397	1860	620	321	998	231	2289	2604	4449	258	100	82	1455	775	1463	918
SNORA55	3	1	6	2	2	2	1	0	0	2	3	2	2	7	0	3	1	0	3	0	1	1	1	0	2	3	0	1	1	2	1	2	12	6	3	2	0	2	0	1	1	8	0	0	0	0	0	1	1
HEYL	0	0	0	155	96	63	124	102	38	60	182	170	160	36	3	23	0	1	2	29	44	83	0	0	1	2	9	46	26	0	0	2	166	170	113	32	18	43	16	148	190	303	19	4	4	2	2	4	47
NT5C1A	0	0	0	0	0	0	0	1	0	0	0	0	0	0	0	0	0	0	0	0	0	0	0	0	0	0	0	0	0	0	0	0	0	0	1	0	0	0	0	0	1	0	0	0	0	0	0	0	0
HPCAL4	5	2	6	5	0	0	5	8	0	2	5	7	0	0	1	3	0	0	2	0	1	1	0	1	0	1	0	0	2	2	1	4	2	6	3	10	1	1	0	4	7	13	1	0	0	3	2	5	6
PPIE	371	364	517	917	533	406	789	624	178	385	795	672	686	551	50	374	264	490	1113	342	209	320	245	248	329	631	82	396	299	276	321	1077	1142	961	671	261	184	428	108	755	735	1368	116	23	34	446	253	451	382
BMP8B	3	3	2	297	194	144	67	83	42	72	273	248	231	52	1	42	108	160	368	9	69	127	4	0	5	7	19	77	63	1	0	2	364	288	237	22	18	44	18	202	237	407	8	7	1	108	65	108	66
OXCT2	0	5	15	6	3	3	2	5	0	0	7	2	3	6	1	3	1	3	4	2	0	3	4	0	2	4	0	4	1	7	4	17	7	3	7	3	0	0	0	4	2	5	1	0	0	1	0	1	0
TRIT1	335	330	462	369	181	162	499	388	81	138	394	366	266	291	23	191	124	226	542	45	99	153	118	115	199	370	43	222	174	245	280	786	585	407	288	128	71	247	49	458	440	879	109	31	16	283	145	265	194
MFSD2A	322	342	516	84	63	37	181	143	7	13	110	94	87	38	6	36	29	48	114	20	29	61	271	271	319	670	5	58	35	495	391	1121	137	135	90	100	59	11	8	85	125	165	13	6	3	63	22	84	226
CAP1	14755	12205	20107	7515	4146	3297	2545	2517	1212	2382	6940	6722	6198	8143	748	5365	3422	5695	14034	569	1724	2896	6794	6832	6552	13268	1083	4907	4000	11349	12948	40741	10192	8411	6073	1015	622	3036	619	5370	6278	10939	1005	287	249	7305	3472	7081	6593
PPT1	897	775	1294	1894	1085	836	942	1365	325	780	1682	1581	1478	1364	105	843	783	1285	2835	227	478	834	321	355	466	926	207	923	758	622	715	1854	2942	2225	1579	280	127	790	179	2150	2183	3775	187	41	56	1042	534	979	1345
RLF	356	496	881	441	211	140	241	315	76	140	383	367	365	346	31	234	209	255	688	7	99	184	127	154	198	409	84	479	385	339	372	957	775	410	335	105	37	265	47	360	545	685	396	86	87	681	462	691	374
TMCO2	0	0	0	1	0	0	1	0	0	0	1	0	0	0	0	0	0	1	0	0	0	0	0	0	0	0	0	0	0	0	1	0	0	0	0	0	0	0	0	0	0	0	0	0	0	0	0	0	0
ZMPSTE24	628	565	1365	1196	583	357	368	426	215	500	1121	1215	1040	1939	200	1082	774	950	2762	72	366	718	320	383	697	1638	227	1208	902	485	534	1591	1941	1103	804	89	56	914	184	1226	1076	2059	265	74	83	1135	559	933	1140
COL9A2	10	18	18	1	1	3	25	16	0	0	11	2	8	19	2	11	48	73	168	1	3	2	2	2	1	4	0	2	5	19	16	66	2	1	10	6	4	0	0	7	6	16	6	2	1	179	140	220	0
SMAP2	384	333	495	263	131	120	216	159	61	104	308	296	299	213	20	138	168	278	737	26	97	126	167	183	160	308	24	137	135	310	296	1108	314	257	212	84	48	86	21	254	300	475	45	8	10	329	206	328	207
ZFP69B	27	39	73	45	28	16	14	21	8	26	56	31	42	17	0	2	27	27	75	2	11	34	9	6	13	42	1	9	9	33	38	91	54	56	40	4	1	34	6	41	53	84	4	0	0	61	18	43	17
ZFP69	96	61	103	1	0	0	0	0	0	0	0	0	1	0	0	0	26	38	77	0	0	0	19	15	29	59	0	2	0	53	52	133	3	0	0	0	0	0	0	0	0	0	0	0	0	50	30	45	0
EXO5	54	45	64	134	89	53	58	50	14	33	111	95	96	31	4	28	94	153	297	20	23	59	26	30	33	72	9	49	42	57	41	113	143	115	83	16	8	21	10	80	66	167	11	4	3	117	86	129	45
ZNF684	25	28	42	35	22	8	42	22	8	13	29	36	32	9	5	11	26	22	72	8	15	23	10	9	13	28	0	17	11	8	15	60	67	45	24	2	2	29	1	29	33	77	6	1	0	40	22	24	10
RIMS3	43	34	63	197	146	87	140	113	39	76	239	211	215	69	8	58	43	74	165	13	58	99	15	16	10	17	10	62	44	29	27	90	298	236	173	56	33	39	15	278	322	515	22	4	2	120	48	111	80
NFYC	321	250	345	766	418	327	1354	981	175	365	911	881	778	546	46	406	385	770	1831	223	233	355	155	185	205	387	41	183	157	278	265	859	918	761	574	420	261	441	115	749	726	1488	146	37	22	837	399	945	450
MIR30E	0	1	0	0	0	0	0	0	0	0	0	0	0	0	0	0	0	0	0	0	0	0	0	0	0	0	0	0	0	0	0	0	0	0	0	0	0	0	0	0	0	0	0	0	0	0	0	0	0
MIR30C1	0	3	0	0	0	0	0	0	0	0	0	0	0	0	0	0	0	0	1	0	0	0	0	0	0	0	0	0	0	0	0	0	0	0	0	0	0	0	0	0	0	0	0	0	0	0	0	0	0
KCNQ4	6	1	4	8	3	7	15	8	2	4	8	6	7	15	2	10	5	10	20	1	1	1	1	0	1	4	0	4	4	2	0	5	4	7	3	5	2	2	3	6	13	27	15	2	3	29	6	22	34
CITED4	344	308	524	1031	511	486	312	205	88	139	746	756	605	316	30	294	299	810	1434	536	129	128	189	237	614	1069	15	67	77	331	262	1067	1024	1092	860	271	171	28	33	828	755	1734	61	34	21	295	252	562	330
CTPS1	1000	832	1493	3522	2003	1746	811	664	453	828	2926	2769	2682	3010	252	1737	579	1135	2410	416	775	1227	604	617	830	1583	228	1264	938	1037	1089	3111	4781	4166	3375	338	285	940	249	6593	4800	10557	435	121	99	782	415	792	1945
SLFNL1-AS1	7	10	19	108	59	50	21	22	6	11	104	82	95	61	3	32	7	15	48	2	23	34	2	2	5	12	4	13	7	16	14	24	91	91	43	6	7	8	4	251	280	492	14	3	2	26	1	18	23
SLFNL1	3	0	0	58	24	21	6	3	3	1	2	2	4	0	0	0	1	4	9	0	0	1	0	0	1	4	1	4	3	0	0	4	44	35	34	0	2	4	2	6	5	2	0	0	0	3	6	7	3
SCMH1	372	293	474	431	215	162	483	394	80	144	499	422	422	210	16	110	123	240	565	47	129	221	90	111	121	177	31	148	131	287	283	808	481	420	335	151	82	115	38	640	697	1234	63	23	23	259	161	284	320
EDN2	2	2	1	44	26	19	53	44	1	3	17	26	15	186	32	126	6	12	40	7	6	12	1	3	0	1	20	112	108	0	1	6	35	71	50	14	18	1	1	20	34	34	15	7	0	188	101	211	1
HIVEP3	36	50	49	88	66	38	20	16	11	17	68	75	59	16	3	2	85	112	334	6	17	39	11	9	14	24	9	21	23	29	34	92	100	73	59	13	5	32	8	117	120	210	1	1	1	195	117	199	178
GUCA2B	0	0	0	0	3	1	5	4	1	0	0	0	0	4	0	4	0	1	0	2	0	1	0	0	0	0	1	2	1	0	0	0	1	0	0	0	0	0	0	0	0	0	0	0	0	1	0	1	0
GUCA2A	0	0	0	0	0	0	0	0	0	0	0	0	0	0	0	0	0	0	0	0	0	0	0	0	0	0	0	0	0	0	0	0	0	1	0	0	0	0	0	0	0	0	0	0	0	0	0	0	0
FOXJ3	1294	1226	1883	781	404	338	863	764	215	385	874	880	847	889	74	498	327	539	1410	20	235	428	265	253	294	573	88	477	368	1116	1177	3109	1175	850	644	257	144	435	78	1009	1058	1866	351	87	80	1137	565	993	617
RIMKLA	1	0	0	266	144	122	211	201	41	85	161	174	139	136	9	92	39	40	185	32	41	111	0	0	0	1	58	338	256	0	1	0	294	273	199	64	46	74	22	69	153	157	16	6	1	22	23	20	103
ZMYND12	1	1	2	7	7	2	28	19	2	2	9	7	6	4	0	1	8	12	29	1	0	2	1	1	1	1	1	7	6	2	5	3	19	9	8	3	9	0	0	23	23	31	0	0	0	24	9	21	0
PPCS	295	426	854	611	363	207	703	810	148	334	619	576	634	665	67	380	544	893	1889	59	165	304	133	161	342	518	118	450	433	307	295	785	887	676	537	317	116	274	56	649	679	1334	114	38	40	824	568	865	298
CCDC30	6	4	13	8	3	4	27	19	4	6	5	12	17	12	2	5	5	7	16	0	4	4	0	0	1	2	1	6	4	7	1	22	12	9	6	8	5	20	0	6	7	17	2	0	0	7	12	11	8
PPIH	777	601	951	518	279	219	561	319	80	190	667	552	541	164	17	112	360	686	1374	229	165	261	168	186	242	417	37	128	129	547	623	1510	663	623	386	105	63	215	41	385	386	776	19	6	10	504	264	489	252
YBX1	20257	16743	25594	11042	6644	5555	13632	8299	2034	4567	10070	10531	10351	9663	818	5951	9621	18314	38172	2655	3625	6036	5710	6418	7033	12236	1113	5086	3615	19417	17978	56479	13260	11547	8963	3548	2081	8144	1272	5555	6020	12460	1363	354	339	14218	8123	15331	7791
CLDN19	1	1	2	0	0	1	0	0	0	0	0	0	0	0	0	0	0	0	0	0	0	0	0	0	0	0	0	1	0	0	0	0	0	0	1	0	0	0	1	0	0	0	0	0	0	0	0	0	0
C1orf50	82	60	109	98	48	48	100	83	27	47	117	93	89	136	15	116	64	127	292	58	16	55	69	66	94	165	11	70	60	63	72	232	119	120	78	47	35	19	8	108	145	211	16	8	14	103	44	94	46
ERMAP	186	175	213	247	146	95	263	266	52	97	234	214	193	183	13	106	42	66	208	13	60	109	46	32	45	90	12	76	69	136	137	383	270	211	185	62	41	110	39	253	241	494	22	9	8	85	44	56	89
ZNF691	97	77	154	195	83	80	290	187	51	74	207	191	191	177	19	127	108	169	334	34	51	77	35	30	51	93	32	96	96	87	77	228	210	209	151	76	64	81	21	208	182	416	49	7	20	254	117	235	59
SLC2A1	7681	7767	11053	6189	3622	2886	2359	2230	811	1566	3312	3356	3088	1985	184	1434	2564	4664	11280	293	992	1642	4495	4222	4054	7287	690	2969	2652	6655	5885	16607	6293	6055	4545	862	618	524	271	4277	8929	10406	352	121	87	6978	4148	7404	4146
SLC2A1-AS1	20	28	29	12	7	3	24	15	6	2	9	6	6	15	2	8	9	16	25	5	3	7	6	6	6	14	1	12	3	23	12	63	6	8	6	5	3	8	0	11	17	19	3	0	0	16	9	13	8
FAM183A	6	8	9	7	5	1	19	13	0	3	5	2	0	6	1	3	0	0	0	2	0	2	4	3	5	7	1	3	0	7	9	22	6	6	2	11	2	2	0	4	8	22	4	0	0	0	0	0	5
EBNA1BP2	1267	1039	1637	2455	1437	1202	1901	1294	457	983	2098	1829	1939	1458	136	949	1388	2881	5505	1026	579	835	685	703	917	1708	228	1146	903	1118	1155	3616	3036	2720	2056	684	479	1900	333	1967	1680	3595	228	68	72	2124	1096	1950	1282
TMEM125	76	74	70	0	0	0	1	0	0	0	0	0	0	0	0	0	131	259	619	0	0	0	26	19	36	65	0	0	0	53	50	179	0	0	0	0	0	0	0	0	0	0	3	0	0	314	163	366	0
C1orf210	86	78	150	0	0	0	0	1	0	0	0	0	0	0	0	0	167	341	737	1	0	0	14	28	26	55	0	0	0	61	51	161	0	0	0	0	0	0	0	0	0	1	0	0	0	274	188	388	0
TIE1	0	0	0	0	2	0	0	0	0	0	0	0	0	0	0	0	0	0	0	0	0	0	0	0	0	0	1	0	0	0	0	0	0	0	0	0	0	0	0	2	0	0	0	0	0	0	0	0	0
MPL	1	6	0	1	0	5	5	10	1	0	4	2	2	1	0	5	2	0	22	0	1	1	1	1	0	4	1	1	2	3	3	1	5	5	4	3	2	0	1	1	4	10	0	0	0	5	4	4	0
CDC20	280	198	380	2738	1590	1284	1362	784	613	1316	2849	2608	2173	111	15	81	1011	2200	4363	1130	696	974	395	362	237	457	16	64	61	208	220	589	2937	2891	2198	198	207	1241	444	1243	1109	2302	36	18	16	1174	538	1260	679
ELOVL1	1364	1132	1780	2540	1450	996	1757	1629	371	756	2347	1973	1728	1551	147	1144	1420	2845	6060	441	604	990	1223	1236	1425	2732	283	1239	1054	1360	1354	4077	2835	2568	1869	545	407	568	203	1946	1976	3624	266	75	46	2993	1376	3200	1649
MED8	330	211	368	735	413	293	558	444	127	218	631	564	495	581	41	377	233	528	1063	135	162	227	202	205	298	549	63	368	269	246	239	801	879	729	527	172	133	242	89	803	738	1380	143	38	37	691	328	711	456
SZT2	561	551	780	818	476	347	450	427	128	235	896	857	852	742	52	504	174	340	987	65	244	421	180	171	163	335	58	261	188	543	490	1530	834	794	575	207	113	118	40	820	855	1489	153	44	24	601	254	652	546
HYI	279	228	385	0	0	0	0	0	0	0	106	100	92	2	1	1	263	583	884	71	24	41	0	0	0	0	0	0	0	353	301	934	0	0	0	0	0	0	0	140	123	268	2	0	0	382	216	391	71
PTPRF	6736	6712	9712	9027	5052	3783	2965	2866	1053	1851	6953	7334	6869	6800	607	4797	4323	7274	20377	346	1804	2719	3348	3093	2266	4404	884	4600	3478	7615	5740	18112	10012	9737	7240	767	614	1317	401	11000	12200	19543	994	283	237	10933	5071	11876	4941
KDM4A	1251	1099	1480	802	450	323	689	485	167	340	927	818	754	1135	85	723	370	574	1459	54	224	385	257	232	248	474	88	487	411	938	1090	2968	926	784	617	199	138	271	67	1138	920	1777	202	62	53	1280	597	1250	613
KDM4A-AS1	20	26	7	20	12	6	14	20	1	10	25	13	16	11	1	2	4	10	42	9	6	8	3	2	1	9	1	9	5	9	11	33	27	20	20	7	1	1	0	12	1	10	3	2	0	11	10	14	8
ST3GAL3	60	68	109	93	63	45	117	133	28	29	102	89	87	93	5	78	43	119	175	34	22	22	66	63	77	133	9	53	57	86	57	203	124	101	79	43	38	16	7	91	120	181	18	7	9	93	60	113	47
ARTN	206	214	235	8	7	2	50	30	4	5	13	16	18	8	3	14	7	39	56	1	1	5	286	301	480	863	0	5	4	232	195	518	16	10	5	18	10	1	1	5	7	31	5	0	0	26	19	41	3
IPO13	717	756	991	679	352	292	499	367	114	202	602	529	445	563	50	401	190	389	853	145	177	254	341	312	403	769	67	275	228	738	591	1975	666	582	435	133	88	105	43	351	382	724	124	36	31	344	178	415	288
DPH2	262	198	327	674	439	305	553	439	91	219	720	645	633	215	15	152	256	497	1174	73	171	348	174	138	188	376	19	99	92	222	177	689	791	724	561	126	77	110	51	407	319	612	58	10	11	419	186	443	261
ATP6V0B	456	482	667	1515	935	637	1979	1467	179	336	1288	1001	852	1767	130	1303	1214	2620	4899	581	306	498	508	517	862	1571	147	778	607	500	431	1361	1593	1514	1021	865	562	60	64	722	638	1026	481	128	90	1461	776	1743	940
B4GALT2	694	617	1010	1221	752	532	1138	800	173	301	1030	868	886	645	68	492	527	1309	2700	365	290	480	550	560	593	1068	73	347	261	883	699	2128	1270	1197	933	295	294	268	87	611	596	1124	161	37	31	897	422	1123	515
CCDC24	117	122	185	203	136	100	720	518	40	87	243	220	245	148	15	107	111	297	574	187	70	105	49	75	83	137	8	46	38	200	133	467	237	221	202	224	139	31	12	162	194	330	20	5	3	201	100	178	52
SLC6A9	89	116	156	302	182	122	120	96	64	130	301	336	277	126	11	76	75	152	415	54	94	174	69	48	38	78	23	78	78	146	98	322	341	304	238	63	41	47	22	477	391	892	16	4	2	509	234	583	336
KLF17	0	0	0	6	1	0	0	0	0	1	8	5	2	0	0	0	0	0	1	0	0	1	0	1	0	0	1	1	0	0	2	1	6	7	7	0	0	0	0	14	9	17	2	0	0	0	0	0	11
DMAP1	212	187	310	399	271	214	694	456	94	147	447	396	331	281	33	218	113	298	587	287	134	184	117	121	151	243	25	117	103	196	180	508	476	465	343	214	131	164	47	270	299	623	74	22	19	223	101	254	237
ERI3	288	236	424	911	545	388	937	681	176	373	1026	864	754	582	56	428	473	1045	2136	495	217	337	235	219	315	540	65	368	305	312	244	760	1055	982	733	234	160	166	91	668	654	1180	105	29	13	568	279	585	327
RNF220	543	444	744	989	644	445	1042	796	221	358	1125	1052	976	576	49	363	352	767	1635	126	335	490	263	250	223	449	109	385	284	471	439	1315	1119	1080	794	294	212	338	51	981	969	1985	136	24	24	889	440	969	471
MIR5584	0	0	0	0	0	0	0	0	0	0	0	0	0	0	0	0	0	0	0	0	0	0	0	0	0	0	0	0	0	0	0	0	0	0	0	0	0	0	0	0	0	0	0	0	0	0	0	0	0
TMEM53	86	78	79	179	96	58	416	259	29	44	170	160	149	171	8	115	100	190	398	74	34	79	25	27	27	45	18	56	45	70	58	140	192	190	125	129	78	23	20	41	59	105	25	7	23	115	43	125	83
KIF2C	118	108	198	1612	933	785	661	530	408	701	1672	1487	1391	59	10	19	759	1548	3210	242	436	684	110	135	49	116	3	41	32	77	95	321	2028	1749	1231	125	104	765	182	790	811	1514	17	7	6	797	453	793	572
RPS8	8124	6631	11516	18719	11323	8167	33262	24295	3380	6316	15388	11980	11548	12617	974	7740	5090	11231	20839	7601	3516	5491	5878	6265	10273	15828	2202	10277	8643	6281	6361	19630	24242	19800	13977	8392	6691	9735	2064	18545	17768	30946	1881	568	535	10941	6448	11406	6673
SNORD55	0	0	0	13	5	3	13	6	3	2	8	5	4	3	0	4	4	5	10	0	2	4	9	5	11	10	0	0	0	0	1	1	8	9	14	3	2	0	5	0	0	1	6	1	5	3	3	9	3
SNORD46	0	2	1	1	4	1	4	7	0	0	5	3	2	11	0	4	1	4	11	0	0	0	1	1	5	5	0	3	1	2	2	1	8	2	4	1	2	0	0	6	1	6	16	0	1	8	3	3	1
SNORD38A	4	0	0	2	4	4	23	1	0	0	3	4	2	6	0	1	3	1	1	1	0	0	0	0	3	2	0	0	1	2	0	1	1	2	1	0	1	0	0	9	10	5	7	0	0	2	1	1	2
SNORD38B	1	3	4	13	6	9	34	20	0	1	12	9	6	4	2	10	4	4	13	3	5	2	3	0	1	7	0	4	4	6	2	18	11	8	5	4	5	2	2	7	7	17	5	1	2	4	7	10	2
BEST4	0	0	7	3	7	2	28	32	0	0	5	3	6	16	0	10	7	4	22	0	0	3	0	1	1	0	0	5	7	3	1	10	6	4	5	17	4	0	0	5	10	6	2	0	0	15	3	14	1
PLK3	323	312	408	301	190	161	486	388	46	79	182	198	175	626	68	491	65	140	234	14	41	65	168	172	313	593	39	174	172	400	344	980	285	295	221	168	104	47	16	213	225	504	271	75	65	267	157	349	202
TCTEX1D4	0	3	0	24	13	7	11	13	0	6	5	5	5	1	0	0	4	14	21	3	1	5	6	1	9	17	0	5	1	0	0	4	19	14	9	1	5	2	1	1	4	1	0	1	0	9	3	14	1
BTBD19	34	37	38	110	58	39	174	139	9	12	117	113	91	138	15	103	6	20	39	2	17	41	13	16	18	48	0	35	30	45	27	114	111	104	98	32	18	1	1	38	36	104	31	15	6	23	7	22	35
PTCH2	7	7	0	29	14	12	75	48	3	0	13	33	22	13	1	15	2	0	5	0	6	9	5	7	2	5	1	13	8	8	9	14	17	18	9	19	11	9	3	12	14	11	3	0	2	2	3	0	7
EIF2B3	201	140	306	434	244	202	290	237	54	151	360	343	294	302	23	216	197	382	711	120	87	173	188	163	244	424	35	165	127	189	190	545	622	472	364	74	46	155	42	353	282	606	30	15	18	313	203	307	226
HECTD3	880	801	1235	1061	548	408	922	639	186	301	1060	971	803	1415	134	965	124	270	694	233	271	461	374	327	384	818	119	477	434	884	842	2451	937	892	653	242	145	221	66	603	729	1475	228	62	48	262	149	312	512
UROD	895	716	1179	805	486	370	1082	799	149	257	875	817	692	723	72	485	364	711	1451	314	235	335	512	478	800	1433	120	423	376	741	727	2049	909	845	613	258	219	211	66	467	503	976	163	28	44	367	160	381	343
ZSWIM5	6	2	2	146	80	58	125	128	32	81	152	144	139	98	10	70	0	2	4	7	45	81	1	2	3	1	28	93	84	2	4	17	162	128	82	58	23	66	10	118	127	279	20	5	6	0	2	4	63
HPDL	11	4	7	47	30	22	21	20	8	11	49	51	61	6	1	3	105	284	475	21	18	18	2	6	10	14	0	3	2	3	0	9	52	53	43	7	4	4	2	12	9	15	0	0	0	104	55	119	8
MUTYH	74	76	83	218	143	104	350	262	49	81	277	256	235	41	3	40	107	280	573	57	70	90	47	57	65	108	1	23	18	71	37	167	283	277	232	96	58	80	32	209	202	436	18	2	1	309	154	330	59
TOE1	93	70	122	298	158	121	216	141	59	110	382	352	312	194	20	128	101	224	466	82	83	153	39	41	55	112	23	132	93	68	75	232	341	289	206	51	41	82	37	168	147	342	68	18	12	167	77	163	143
TESK2	63	49	64	26	11	16	10	22	9	11	31	31	23	2	0	2	26	47	138	2	4	7	14	8	8	22	1	4	2	37	31	106	21	13	12	9	2	3	5	20	37	36	0	0	0	85	39	86	11
MMACHC	134	86	149	61	40	21	87	79	11	22	104	62	75	42	5	39	64	140	324	26	18	36	33	34	57	87	4	31	27	102	88	263	85	64	79	22	3	21	4	53	46	80	18	0	4	115	77	143	25
PRDX1	5809	4864	8378	28496	15301	11649	26991	20499	4688	8926	32459	26740	22188	18126	1545	11663	7697	15003	30760	7872	7155	10850	2787	3249	5317	10047	2328	11100	9145	4728	5195	15681	37197	28114	19759	9630	6769	9313	2629	20202	17102	32262	2143	654	658	10744	5842	10655	17527
AKR1A1	420	398	646	1994	1197	758	2529	2009	302	475	1823	1512	1220	1265	118	981	414	918	1904	406	433	677	263	255	362	667	105	550	474	500	419	1156	2103	1760	1245	651	517	337	158	1327	1176	2160	153	57	57	864	362	807	548
NASP	945	757	1318	2959	1722	1377	3915	2460	650	1442	3999	3545	3843	1018	75	569	1697	3205	6638	554	810	1327	408	480	306	580	197	904	644	637	813	2139	4392	3449	2689	900	633	2048	332	2575	2422	4749	216	59	46	2709	1467	2375	1254
CCDC17	8	7	16	38	21	14	87	79	5	5	31	26	13	34	2	16	17	20	45	7	6	11	12	7	8	25	0	7	9	7	10	17	23	22	10	23	15	7	2	18	21	50	1	0	0	34	11	32	6
GPBP1L1	965	812	1324	1187	567	484	1266	950	243	495	1180	1192	1089	883	92	567	806	1169	2959	52	316	547	356	416	510	1071	140	669	555	815	862	2441	1564	1166	885	351	211	794	197	1657	1874	3352	455	110	99	1888	1071	1739	741
RPS15AP10	4	5	6	4	2	0	9	6	2	0	3	0	1	0	0	0	0	0	6	0	0	1	1	1	1	0	0	6	0	1	0	4	1	1	0	0	0	0	2	1	2	0	0	0	0	1	1	1	1
TMEM69	432	442	714	390	190	155	697	501	80	248	381	355	310	819	76	510	323	459	1200	31	82	146	277	297	321	572	48	275	248	434	398	1144	568	424	282	230	117	261	57	475	552	934	242	42	44	710	320	718	198
IPP	169	159	316	207	110	71	56	77	50	98	185	155	152	97	8	74	63	83	295	11	59	105	38	35	78	156	15	76	63	102	126	376	310	165	143	9	7	70	22	229	245	321	24	5	6	152	85	134	94
MAST2	467	489	743	1635	883	767	1403	1035	213	346	1439	1367	1182	1476	120	1001	325	644	1494	255	432	729	275	252	239	482	134	620	464	542	452	1433	1540	1587	1180	356	247	355	106	913	959	1693	239	69	66	707	393	872	747
PIK3R3	502	457	909	79	50	37	44	52	22	58	113	101	97	405	25	239	158	256	645	9	28	65	5	2	7	9	22	126	109	354	386	956	98	68	53	32	24	66	11	20	14	35	61	17	14	398	274	399	79
TSPAN1	5312	4454	6118	35	14	13	24	29	3	4	11	14	19	81	9	42	773	1461	2984	8	7	7	1527	1715	2491	4474	6	38	41	3805	4036	11742	26	20	12	5	4	9	0	14	18	20	3	1	1	1031	591	1241	16
POMGNT1	617	559	818	1422	843	647	1390	1060	225	456	1268	1177	1118	992	84	661	824	1642	3620	347	380	583	339	330	356	701	101	501	417	631	598	1582	1555	1539	1182	409	309	307	116	1055	1154	2051	167	44	47	1553	803	1664	906
LURAP1	25	31	36	0	1	0	0	0	0	0	0	0	0	0	0	0	0	0	0	0	0	0	3	6	5	12	0	0	0	21	25	70	1	0	0	0	0	0	0	0	0	0	0	0	0	0	0	1	0
RAD54L	45	34	60	446	222	169	174	106	53	100	387	336	285	27	1	13	139	349	658	57	93	146	67	86	28	67	15	44	33	33	34	79	491	475	317	31	29	110	31	113	108	195	7	2	2	154	84	176	122
LRRC41	1105	974	1515	1349	762	573	901	811	320	589	1477	1302	1214	2056	173	1411	431	761	2083	178	350	588	479	477	668	1307	210	1033	933	1092	979	2722	1504	1419	1077	301	207	279	130	957	1016	1673	344	101	82	822	399	994	665
UQCRH	2646	2056	3650	3480	2028	1505	4507	2833	502	1277	3149	2510	2555	4009	334	2474	2817	5747	11762	996	728	1193	709	807	1456	2529	399	1929	1557	1923	2124	6868	4907	4321	2682	1237	937	1679	229	2562	2521	4451	574	181	159	4388	2217	4404	1580
NSUN4	377	327	529	462	277	200	380	328	115	221	449	444	386	302	22	203	145	260	759	62	139	191	139	142	168	306	28	152	121	292	322	994	613	490	410	123	89	158	54	526	492	984	76	21	19	455	266	426	313
FAAH	51	48	104	15	6	4	59	40	1	5	13	8	8	39	4	29	98	181	370	9	6	6	43	33	71	120	1	6	6	41	31	101	11	10	5	11	7	5	1	10	7	21	20	1	4	164	88	197	8
DMBX1	0	0	0	97	56	38	62	41	8	11	134	101	108	4	0	1	38	51	91	11	39	39	0	1	0	0	2	8	6	0	0	0	123	101	76	22	15	9	2	38	102	117	4	0	2	24	8	30	26
MKNK1-AS1	2	0	0	10	5	3	2	5	0	3	1	0	0	0	0	0	0	0	0	0	0	0	1	2	2	5	2	3	4	0	0	6	5	3	1	2	0	4	0	0	3	0	0	0	0	1	0	0	0
KNCN	0	0	0	0	0	0	0	0	0	0	0	0	0	0	0	0	0	0	0	0	0	0	0	0	0	0	0	1	0	0	0	0	0	0	0	0	0	0	0	0	0	0	0	0	0	0	0	0	0
MKNK1	364	345	625	429	242	188	378	297	94	155	449	449	418	431	49	326	148	335	709	52	140	217	169	217	223	461	48	236	178	365	370	1212	540	419	347	186	85	162	38	406	464	805	78	32	10	484	232	574	343
MOB3C	300	261	369	158	102	83	178	144	31	77	152	163	167	44	6	43	79	195	387	37	54	74	82	78	105	175	12	48	35	258	277	790	225	217	159	118	68	32	10	209	236	474	10	5	4	531	255	592	307
ATPAF1	441	368	642	877	407	314	398	499	204	488	792	665	616	690	61	510	280	489	1259	90	175	296	118	111	173	295	95	474	378	284	301	1012	1138	885	734	141	57	515	101	724	720	1229	99	28	28	496	274	524	322
TEX38	0	0	0	0	0	0	2	1	0	0	1	0	0	0	0	0	0	0	0	0	0	0	0	0	0	0	0	0	0	0	1	0	2	1	0	0	1	0	0	0	1	1	0	0	0	0	0	0	0
EFCAB14-AS1	0	5	0	2	0	1	0	2	0	0	0	0	0	0	0	0	0	0	0	0	0	0	0	0	0	1	0	1	0	2	1	0	3	1	0	0	1	0	1	0	0	0	0	0	0	0	0	0	0
EFCAB14	1444	1481	2725	1562	838	606	711	826	271	609	1555	1570	1431	1205	94	805	1139	1551	4282	66	427	882	476	514	579	1228	134	813	573	1249	1325	3950	2068	1568	1251	253	130	716	182	1481	1855	2755	254	71	81	1873	1020	1667	1152
CYP4B1	21	25	27	0	0	0	1	0	0	0	0	0	0	0	0	0	3	6	11	0	0	1	3	0	11	22	0	0	0	15	8	35	0	0	0	0	0	1	0	0	0	0	0	0	0	11	7	11	0
CYP4Z2P	0	0	0	0	0	0	0	0	0	0	0	0	0	0	0	0	0	0	0	0	0	0	0	0	0	0	0	0	0	0	0	0	0	0	0	0	0	0	0	0	0	0	0	0	0	0	0	0	0
CYP4A11	0	0	0	0	0	0	0	0	0	0	0	0	0	0	0	0	0	1	0	0	0	0	0	0	0	0	0	0	0	0	0	0	0	0	0	0	0	0	0	0	0	0	0	0	0	0	0	0	0
CYP4X1	38	32	40	0	0	0	4	1	0	0	1	0	0	0	0	0	3	5	6	0	0	0	4	2	6	10	0	1	0	27	30	81	0	0	1	1	0	1	0	1	1	3	0	0	0	3	1	8	0
CYP4Z1	0	0	0	0	0	0	0	0	1	0	0	0	0	0	0	0	0	0	0	0	0	0	0	0	0	0	0	0	0	0	1	0	1	0	0	0	0	0	0	0	0	0	0	0	0	0	0	0	0
CYP4A22	0	0	0	0	0	0	0	0	0	1	0	0	0	0	0	0	0	0	0	0	0	0	0	0	0	0	0	0	0	0	0	0	0	0	0	0	0	1	0	0	0	0	0	0	0	0	0	0	0
LINC00853	4	2	8	13	6	5	22	28	1	4	5	11	7	4	1	4	2	7	20	10	2	1	1	0	0	3	3	4	2	1	4	6	19	13	8	5	9	1	3	11	12	22	3	1	0	31	19	22	2
PDZK1IP1	43	38	36	576	368	250	251	199	29	33	377	332	257	38	1	17	2232	4831	9836	147	84	92	47	55	14	19	20	77	110	192	146	460	721	756	510	113	104	28	10	976	1132	2110	7	2	4	8149	4497	9501	994
TAL1	0	0	0	1	1	0	5	0	1	0	0	0	0	2	0	0	0	0	5	0	0	0	0	0	0	0	0	1	0	0	0	0	1	1	0	0	1	3	0	4	2	4	0	0	0	0	2	0	0
STIL	103	84	157	841	405	319	207	221	172	458	753	793	687	122	12	93	625	816	2374	20	252	385	97	84	57	111	22	97	78	91	105	299	1231	891	639	70	31	622	129	570	522	1024	20	12	9	1296	718	1269	514
CMPK1	1504	1192	2430	1983	986	649	1235	1467	402	900	1774	1854	1813	2312	222	1358	1810	2203	6403	114	554	1241	516	559	1250	2759	369	1951	1607	1441	1507	4556	3159	1926	1431	229	155	1233	258	2226	3130	4773	490	128	152	4201	2624	3806	1745
FOXE3	1	1	0	1	0	0	2	0	0	0	1	0	0	0	0	0	0	2	4	1	0	1	0	0	0	0	0	0	0	0	0	1	0	1	0	2	2	0	0	0	1	1	0	0	0	4	2	0	0
FOXD2-AS1	7	13	45	62	32	21	65	55	9	13	52	47	41	51	1	24	28	45	96	16	16	30	11	5	1	10	5	25	26	14	13	39	46	52	39	20	15	16	9	39	44	110	17	5	5	70	30	63	24
FOXD2	5	3	8	61	37	27	82	69	12	21	30	25	43	15	3	16	16	33	80	7	15	22	2	2	5	3	3	16	13	4	2	8	60	79	49	20	12	12	3	24	23	45	14	2	2	32	22	38	8
TRABD2B	31	33	30	24	10	8	30	8	1	3	15	24	20	24	4	17	2	9	17	0	2	13	5	5	1	5	4	19	13	29	17	77	11	6	4	7	3	2	0	68	59	106	10	2	8	16	16	26	16
SLC5A9	0	0	0	5	2	2	138	96	0	0	1	1	2	23	4	20	8	8	17	1	3	0	0	1	0	0	2	3	1	1	0	0	4	8	3	6	2	3	0	0	0	0	2	1	2	7	0	7	0
SPATA6	38	23	55	42	29	19	67	77	13	32	62	68	58	14	0	10	32	43	135	3	12	22	13	9	8	17	1	22	22	18	21	48	84	49	56	23	9	36	6	90	119	151	11	2	3	55	34	64	16
AGBL4	0	0	0	0	0	0	0	0	0	0	0	0	0	0	0	0	0	0	0	0	0	0	0	0	0	0	0	0	0	0	0	0	0	1	0	0	0	0	0	0	0	2	0	0	0	1	0	1	0
BEND5	0	0	0	0	0	0	4	0	1	0	0	0	0	0	0	0	0	1	11	0	0	1	0	0	0	0	0	0	0	0	1	1	0	0	0	0	0	0	0	2	0	0	0	0	0	0	2	3	0
ELAVL4	0	0	0	0	0	0	0	0	0	0	0	0	0	0	0	0	0	0	0	0	0	0	0	0	0	0	0	0	0	0	0	0	0	0	0	0	0	0	0	0	0	0	0	0	0	0	0	0	0
DMRTA2	43	68	69	18	11	5	5	6	11	17	12	9	9	14	1	10	7	2	13	1	1	1	65	81	149	220	0	5	0	61	40	101	18	9	5	0	0	12	2	0	0	5	8	6	0	8	3	9	5
FAF1	465	425	757	861	451	363	644	546	168	348	902	809	727	608	55	363	610	1221	2503	235	223	420	190	194	251	506	105	485	358	404	410	1121	1083	945	619	163	119	460	96	881	883	1718	149	42	32	1071	611	1074	486
CDKN2C	96	62	108	579	355	259	874	585	156	351	581	487	502	148	7	107	369	768	1635	114	163	343	28	31	13	24	23	92	83	24	57	135	550	478	385	111	68	120	47	72	145	200	62	17	10	308	199	395	243
C1orf185	0	0	0	0	0	0	0	0	0	0	0	0	0	0	0	0	0	0	0	0	0	0	0	0	0	0	0	0	0	0	0	0	0	0	0	0	0	0	0	0	0	0	0	0	0	0	0	0	0
RNF11	886	983	1518	530	268	193	256	244	100	241	510	584	488	642	83	438	753	800	2698	2	168	308	261	303	617	1465	125	612	479	665	763	2097	746	449	393	70	41	253	48	550	866	1382	346	87	95	1637	1148	1567	554
TTC39A	87	69	118	182	105	77	248	198	25	59	159	158	152	142	9	102	167	298	733	27	43	108	14	21	41	59	22	84	90	67	66	184	158	215	114	47	42	33	13	222	239	442	21	6	9	324	201	339	99
EPS15	614	521	969	745	391	262	334	503	171	355	775	834	711	682	75	451	420	446	1588	21	184	384	231	223	330	728	108	475	368	479	494	1675	1160	653	521	103	39	487	103	1212	1639	2341	115	39	58	1274	686	1141	621
OSBPL9	1675	1596	3055	2239	1149	804	2000	2024	376	858	2540	2438	2224	2491	239	1607	922	1313	3299	94	529	1074	403	429	629	1203	250	1066	856	1359	1560	4035	3402	2278	1674	672	327	1236	197	2055	2242	4223	519	164	159	1823	1117	1725	1330
MIR761	0	0	0	0	0	0	0	0	0	0	0	0	0	0	0	0	0	0	0	0	0	0	0	0	0	0	0	0	0	0	0	0	0	0	0	0	0	0	0	0	0	0	0	0	0	0	0	0	0
RAB3B	250	177	431	936	461	461	139	144	73	120	643	645	668	359	33	200	20	20	82	39	198	344	91	92	52	113	42	203	184	204	205	605	1184	842	773	91	94	180	30	1317	1288	2147	30	14	7	29	16	27	1274
TXNDC12	654	566	948	1666	927	664	2074	1608	320	617	1698	1581	1520	730	63	449	1083	1785	3927	188	455	754	429	478	660	1234	155	628	485	441	577	1730	2366	1571	1199	478	253	981	216	1605	1570	3018	119	47	35	1675	979	1659	1052
KTI12	0	0	0	0	0	0	0	0	0	0	0	0	0	0	0	0	0	0	0	0	0	0	0	0	0	0	0	0	0	0	0	0	0	0	0	0	0	0	0	0	0	0	0	0	0	0	0	0	0
BTF3L4	210	188	465	543	271	159	503	552	128	294	533	566	573	915	90	617	788	1015	2721	56	161	274	122	150	326	613	128	550	484	174	176	581	900	507	403	112	71	385	86	1103	1234	2127	294	68	82	2105	1172	2004	317
ZFYVE9	542	517	847	403	186	162	237	226	79	164	385	369	324	312	32	219	149	219	625	22	93	216	160	186	183	369	64	297	184	443	471	1499	541	360	296	91	54	200	37	529	483	918	71	22	20	291	166	290	306
CC2D1B	678	625	916	1042	632	533	983	737	145	271	1027	895	818	728	78	484	335	684	1436	109	242	393	368	333	471	818	78	378	324	616	577	1746	1114	1091	811	270	233	218	67	796	851	1656	206	42	54	906	426	968	595
ORC1	48	42	43	882	431	400	193	147	143	263	918	838	767	131	12	83	265	516	1219	99	220	329	64	61	31	39	30	176	96	25	28	103	1047	932	674	39	42	313	76	230	285	512	37	7	7	279	162	301	233
PRPF38A	343	326	600	495	299	234	429	416	124	261	601	539	527	556	41	336	348	553	1416	55	162	239	149	151	211	427	71	410	312	266	301	913	763	564	447	156	71	361	62	455	433	744	278	54	73	604	313	576	390
GPX7	10	6	13	0	0	0	0	0	0	1	0	0	0	0	0	0	5	1	4	0	0	0	13	11	11	17	1	0	0	12	12	21	0	0	0	0	0	2	0	0	0	0	0	0	0	2	0	0	0
ZYG11B	339	271	557	521	276	190	167	270	135	247	456	451	465	339	40	212	151	150	470	21	124	304	91	95	182	358	60	327	233	280	251	769	776	426	350	58	26	260	79	592	725	1007	83	21	16	338	164	323	252
ZYG11A	2	3	3	133	86	56	120	129	30	47	140	128	106	71	5	33	0	0	4	9	32	46	2	2	5	8	15	41	32	3	2	5	228	156	140	25	21	59	10	118	139	288	32	3	4	0	0	1	105
ECHDC2	180	230	338	203	104	105	576	468	21	48	171	138	162	70	5	41	180	414	881	69	61	68	104	103	140	221	11	50	54	231	165	512	230	207	170	160	119	21	10	185	177	390	8	3	2	312	172	316	58
SCP2	2013	1790	2928	1277	684	550	1304	1453	224	543	1398	1098	1137	804	74	537	982	1433	3891	27	365	616	393	474	848	1797	179	730	614	1117	1408	4128	1958	1336	1021	332	157	475	105	1088	1378	2147	114	50	39	1493	878	1492	496
PODN	0	0	0	0	1	1	2	0	0	0	0	0	1	0	0	0	0	0	0	3	0	0	0	0	0	0	0	1	0	0	0	0	1	0	0	0	0	0	0	0	3	0	0	0	0	0	0	0	0
SLC1A7	0	0	0	1	3	1	9	6	0	1	2	0	1	1	0	0	0	0	4	0	0	1	0	0	0	0	0	1	0	0	0	0	1	0	2	2	0	0	0	0	1	0	0	0	0	3	3	9	0
CPT2	565	482	687	324	197	172	293	323	86	162	389	324	318	494	53	330	265	513	1151	37	95	159	128	169	235	389	55	275	207	374	384	1157	433	370	308	110	74	157	51	272	322	522	101	27	31	608	344	616	207
C1orf123	253	205	337	552	329	253	960	685	117	211	594	592	451	419	42	319	178	335	681	176	138	196	147	121	176	312	55	244	193	209	193	663	682	591	398	268	185	262	64	541	592	1118	56	39	17	347	190	347	152
MAGOH	724	530	851	624	351	260	1039	550	100	304	622	554	743	302	22	182	420	924	1900	114	170	273	161	190	269	457	55	226	169	501	544	1726	837	668	487	346	171	197	57	771	613	1336	94	28	25	1036	512	941	353
LOC100507564	6	11	20	1	6	3	14	14	0	4	16	9	14	1	1	6	6	20	49	2	2	6	1	1	3	1	1	1	3	3	7	16	9	5	9	0	5	7	5	20	36	49	0	2	1	31	19	35	3
LRP8	265	252	480	2373	1226	946	1097	996	354	748	1810	1754	1663	1197	139	882	1013	1530	4254	91	514	850	186	185	178	348	146	656	454	274	316	834	2686	2271	1685	385	222	959	214	1249	1211	2323	261	66	50	1154	622	1180	1760
SLC25A3P1	0	0	0	0	0	0	0	0	0	0	0	0	0	0	0	0	0	0	0	0	0	0	0	0	0	0	0	0	0	0	0	0	0	0	0	0	0	0	0	0	0	0	0	0	0	0	0	0	0
DMRTB1	0	0	0	0	0	0	0	0	0	0	0	0	0	0	0	0	0	0	0	0	0	0	0	0	0	0	0	0	0	0	0	0	0	0	0	0	0	0	0	0	0	0	0	0	0	0	0	0	0
GLIS1	0	1	0	0	0	0	0	0	0	1	0	0	0	0	1	0	0	0	0	1	0	0	0	0	1	0	0	0	0	0	0	0	0	0	0	0	0	0	0	0	0	0	0	0	0	0	0	0	0
YIPF1	569	487	699	415	252	159	559	409	63	154	393	357	273	375	32	214	162	309	776	124	109	171	177	213	219	480	72	281	221	439	521	1252	530	434	325	181	106	176	50	324	370	697	49	20	13	285	151	284	405
DIO1	1	1	0	3	2	0	0	2	0	0	0	0	0	7	0	4	0	0	0	0	0	0	0	0	0	0	1	0	5	1	0	0	1	4	0	0	0	0	0	0	0	0	0	0	1	0	0	0	0
HSPB11	243	266	504	451	228	174	558	556	107	330	550	490	489	180	15	119	396	709	1486	130	128	267	99	98	185	335	67	254	175	197	232	531	879	576	389	238	100	472	79	426	464	951	24	9	2	465	251	432	311
LRRC42	239	256	501	695	370	318	456	459	141	228	713	563	473	541	56	330	434	773	1545	64	158	257	142	151	233	456	71	381	321	211	220	743	933	739	563	116	106	294	67	825	800	1445	133	38	42	1213	620	1206	381
LDLRAD1	16	7	23	1	0	0	19	15	0	0	0	0	1	44	0	23	3	3	0	0	0	1	1	0	0	3	1	3	6	2	9	35	1	0	0	1	0	2	0	0	0	1	0	3	1	2	0	9	0
TMEM59	1511	1571	2835	1732	942	621	1407	2008	317	659	1785	1484	1486	2229	195	1465	2709	4312	10108	194	438	861	558	615	1185	2260	401	1913	1588	1432	1300	3270	2590	1875	1302	479	222	724	206	1928	2117	3288	250	91	68	4440	2610	4473	1201
TCEANC2	305	263	448	164	85	62	97	81	46	92	177	147	153	150	11	106	88	164	386	7	38	69	72	78	102	213	25	85	64	180	259	698	239	185	134	40	13	70	25	169	160	284	15	4	7	264	155	261	74
MIR4781	0	0	0	0	0	0	0	0	0	0	0	0	0	0	0	0	0	0	0	0	0	0	0	0	0	0	0	0	0	0	0	0	0	0	0	0	0	0	0	0	0	0	0	0	0	0	0	0	0
CDCP2	0	0	0	0	0	0	0	0	0	0	0	0	0	0	0	3	0	0	2	0	0	0	0	0	0	0	0	0	0	0	0	0	0	0	0	0	0	0	0	0	0	0	0	0	0	0	0	1	0
CYB5RL	13	6	20	205	130	101	84	62	28	58	175	159	134	79	2	38	32	78	244	9	45	70	7	7	2	10	6	30	30	13	7	33	228	179	124	18	15	50	16	75	81	151	17	7	3	77	28	63	48
MRPL37	1236	997	1421	1675	924	720	1067	901	295	643	1743	1536	1313	797	54	472	1208	2515	5165	718	522	806	460	442	493	919	111	565	432	1073	1032	3046	1898	1547	1195	284	256	764	226	1133	1198	2227	128	42	40	1635	821	1677	840
SSBP3	303	334	407	184	117	102	205	186	50	123	280	311	253	120	11	72	117	205	534	15	71	108	190	183	195	321	20	87	78	275	263	684	236	223	154	67	29	67	13	209	194	405	12	11	7	232	171	275	104
ACOT11	74	61	145	66	36	25	48	48	11	17	132	93	87	31	1	20	74	176	480	14	23	61	37	37	51	83	4	20	9	82	67	204	75	81	46	17	7	10	4	29	51	76	5	1	0	155	78	196	35
FAM151A	4	1	6	0	4	2	8	3	1	0	0	0	0	0	0	0	0	0	0	0	0	0	2	1	3	3	0	0	0	2	0	8	0	7	1	0	0	1	0	0	0	2	0	0	0	1	2	3	0
MROH7	0	0	0	0	0	0	0	0	0	0	0	0	0	0	0	0	0	0	0	0	0	0	0	0	0	0	0	0	0	0	0	0	0	0	0	0	0	0	0	0	0	0	0	0	0	1	2	0	0
TTC4	15	16	31	19	13	3	10	2	0	12	11	10	13	3	0	5	6	8	26	1	3	12	3	2	3	12	1	13	5	15	10	28	21	23	16	1	2	0	1	9	4	6	0	0	1	15	5	32	8
PARS2	67	43	101	123	64	47	81	55	18	51	172	128	119	199	18	109	100	188	453	23	40	62	24	22	27	64	17	82	70	63	72	168	163	141	91	15	7	34	12	181	144	269	41	11	10	228	126	254	45
TTC22	73	47	77	0	0	0	0	0	0	0	0	0	0	1	0	0	107	186	539	0	0	0	40	42	45	93	0	0	0	80	64	152	0	0	0	0	0	0	0	0	0	0	0	0	0	185	105	249	0
DHCR24	9159	8271	12536	4289	2444	1744	4665	3623	718	1218	3674	3373	2926	6216	512	4292	6771	12086	30719	402	1151	2132	4257	4173	4509	8480	381	1877	1518	7650	7017	22323	5000	4537	3454	1294	756	923	361	748	897	1369	474	187	111	5560	3195	6373	3383
TMEM61	10	10	16	6	5	2	9	1	1	4	4	5	4	0	0	0	6	20	15	1	0	2	10	5	18	34	0	0	0	15	7	29	6	8	4	2	3	5	0	4	3	15	0	0	0	23	8	14	2
BSND	0	0	0	0	0	0	0	0	0	0	0	0	0	0	0	0	0	0	0	0	0	0	0	0	0	0	0	0	0	0	0	0	0	0	0	0	0	0	0	0	0	0	0	0	0	1	0	0	0
PCSK9	330	299	479	2025	1158	826	2575	1682	185	346	1003	927	654	571	59	446	1541	3403	7636	155	333	497	551	557	589	1148	18	120	99	418	336	1001	2076	2138	1568	654	508	164	90	197	243	386	85	19	28	1022	612	1368	640
USP24	936	756	1481	1568	728	666	921	734	343	693	1415	1349	1221	1347	122	848	424	618	1802	61	449	794	346	403	399	838	197	830	622	737	816	2256	1930	1363	1017	279	171	851	158	1701	1877	2783	385	79	90	1131	656	1050	1029
LOC100507634	10	14	16	6	3	3	33	12	2	7	19	23	12	6	0	7	7	12	23	2	2	4	0	1	7	4	0	4	0	4	4	23	15	13	7	11	6	5	3	15	14	34	1	0	0	20	16	24	11
MIR4422	0	0	0	0	0	0	0	0	0	0	0	0	0	0	0	0	0	0	0	0	0	0	0	0	0	0	0	0	0	0	0	0	0	0	0	0	0	0	0	0	0	0	0	0	0	0	0	0	0
PRKAA2	101	105	199	365	167	147	187	234	67	161	390	409	422	395	50	273	182	176	496	12	123	236	25	28	23	39	58	344	284	90	84	187	600	330	263	41	7	212	43	384	631	773	153	33	48	313	203	276	242
C8A	0	0	0	0	0	0	0	0	0	0	0	0	0	0	0	0	0	0	0	0	0	0	0	0	0	0	0	0	0	0	0	0	0	0	0	0	0	0	0	0	0	0	0	0	0	0	0	0	0
C8B	8	6	9	0	0	0	0	0	0	0	0	0	0	0	0	0	0	0	0	0	0	0	0	2	0	0	0	0	0	5	4	3	0	0	0	0	0	0	0	0	0	0	0	0	0	0	0	0	0
DAB1	0	2	2	0	0	0	0	0	0	0	0	0	0	0	0	0	0	0	0	0	0	0	0	0	0	0	0	0	0	1	0	0	0	0	0	0	0	2	0	0	0	0	0	0	0	0	0	0	0
OMA1	201	233	648	261	125	81	277	322	73	185	274	252	225	134	8	54	216	289	758	20	53	106	78	54	111	246	15	75	53	211	221	541	437	268	206	98	50	213	38	264	309	560	25	9	6	436	306	442	78
TACSTD2	17848	19501	24884	0	0	0	0	0	0	0	0	0	0	0	0	0	6541	13474	27076	0	0	0	6846	7592	6458	12041	0	0	0	18592	15773	39249	0	0	0	0	0	0	0	0	0	1	0	0	0	8303	5072	10310	0
MYSM1	384	363	809	391	172	127	273	327	84	211	368	341	382	436	44	279	203	189	700	2	67	188	100	96	145	314	57	224	198	323	281	807	613	375	298	103	23	317	32	537	743	1139	425	99	60	600	355	514	317
JUN	2380	2182	3268	1834	1022	796	4478	3626	236	365	1127	1038	1096	2380	235	1524	1092	2186	4407	57	345	413	1512	1662	1294	2226	263	1126	929	2184	2176	6064	2132	1898	1557	1882	924	517	135	3179	5328	5941	1569	463	398	10378	7676	15180	1846
HSD52	0	0	0	0	0	0	4	2	0	1	1	0	0	0	0	0	0	0	2	0	0	0	0	0	0	0	0	0	0	0	0	0	2	0	0	0	0	2	0	0	0	0	0	0	4	2	3	2	0
FGGY	172	141	258	53	37	31	72	56	7	23	72	77	60	53	4	44	74	143	307	13	14	25	30	35	57	96	14	33	33	123	166	311	96	82	42	17	12	13	9	123	135	250	16	3	3	122	61	139	22
MIR4711	0	0	0	0	0	0	0	0	0	0	0	0	0	0	0	0	0	0	0	0	0	0	0	0	0	0	0	0	0	0	0	0	0	0	0	0	0	0	0	0	0	0	0	0	0	0	0	0	0
HOOK1	182	228	530	105	44	31	63	105	10	22	88	107	93	24	1	14	478	361	1388	1	28	75	75	82	149	331	3	18	25	152	151	443	176	75	67	22	8	44	5	59	95	108	3	5	5	625	345	551	34
CYP2J2	59	51	98	1	1	0	8	6	1	1	2	1	4	1	0	2	199	282	674	0	0	0	9	9	8	19	0	6	1	54	55	172	2	3	6	19	8	0	0	3	1	5	0	0	0	820	427	758	11
C1orf87	0	0	0	0	0	0	0	0	0	0	0	0	0	0	0	0	0	0	0	0	0	0	0	0	0	0	0	0	0	0	0	0	0	0	0	0	0	0	0	0	0	0	0	0	0	0	0	0	0
NFIA	435	459	789	290	139	108	384	429	72	152	415	409	427	265	26	176	175	271	747	48	119	260	121	131	120	285	52	264	183	375	346	1036	406	272	224	66	34	120	20	385	381	649	81	13	15	270	169	301	117
MGC34796	0	0	0	0	0	0	2	0	0	0	0	0	0	0	0	0	0	0	0	0	0	0	0	0	1	0	0	1	0	0	0	0	0	1	0	0	0	0	0	0	0	0	0	0	0	0	0	0	0
TM2D1	536	552	712	298	152	142	380	348	61	168	308	271	249	308	29	195	413	705	1657	7	78	145	110	97	186	349	55	217	188	617	389	1094	491	331	261	164	49	112	36	301	402	707	70	28	20	882	435	783	206
L1TD1	37	25	89	0	0	0	0	0	0	1	0	0	0	2	0	0	0	0	0	0	0	0	23	21	47	87	0	0	0	38	48	142	0	0	1	0	0	0	0	0	0	0	0	0	0	0	0	1	0
KANK4	334	293	492	11	10	8	4	4	0	4	36	30	25	1	0	0	2	0	0	1	6	9	65	57	61	152	0	0	1	241	300	691	8	12	9	0	0	5	0	32	38	65	0	0	0	0	0	0	11
USP1	122	163	390	922	502	309	200	306	197	484	749	801	870	390	38	196	744	786	2302	16	222	474	78	124	145	338	103	527	337	123	96	315	1591	1019	768	38	28	623	110	932	1079	1673	115	37	21	1222	709	1011	483
DOCK7	840	828	1452	832	385	307	221	243	178	379	722	738	673	678	60	429	379	435	1492	21	193	334	244	206	336	736	102	523	324	745	833	2412	1238	910	629	48	39	511	86	1120	1299	1865	112	45	36	925	509	829	670
ANGPTL3	0	0	0	0	1	0	0	1	0	0	0	0	0	0	0	0	0	0	0	0	0	0	0	0	1	1	0	0	0	0	0	0	2	0	0	0	0	0	0	0	0	0	0	0	0	0	0	0	0
ATG4C	63	66	174	205	105	58	121	82	39	97	146	227	167	89	14	57	160	158	456	15	62	122	31	46	77	166	19	75	70	66	71	204	349	200	144	17	8	182	32	257	267	442	20	8	4	251	175	218	86
LINC00466	0	0	0	0	1	0	3	0	3	1	1	1	0	1	0	0	0	1	0	0	0	0	0	0	0	0	0	0	1	0	0	0	1	1	1	0	0	0	0	0	3	3	0	0	0	0	0	0	0
FOXD3	0	0	0	64	27	37	105	63	23	36	33	31	37	21	2	23	4	4	8	2	13	13	0	0	0	0	4	17	16	0	0	0	79	73	39	42	17	15	2	42	35	45	26	15	13	9	10	6	29
ALG6	21	42	91	214	118	51	129	176	50	129	230	223	211	104	12	94	237	294	855	15	63	110	39	47	85	207	13	73	55	31	32	62	319	188	146	45	20	150	28	293	282	577	17	8	7	387	203	361	102
ITGB3BP	22	49	168	412	201	84	246	268	98	233	382	382	420	107	11	67	294	390	946	66	93	185	73	66	177	313	34	185	157	39	41	115	792	420	254	32	14	348	61	316	426	597	15	9	4	353	284	327	193
EFCAB7	149	175	263	131	53	51	120	167	46	94	137	140	132	56	10	41	98	108	277	6	48	110	18	19	53	109	15	73	49	84	102	243	259	143	107	53	5	143	15	100	136	242	15	7	4	130	62	118	179
DLEU2L	7	6	12	4	1	0	9	5	2	0	2	2	2	3	0	0	0	1	6	0	0	3	2	1	0	4	0	3	1	5	5	10	5	6	4	3	0	3	0	3	4	10	1	0	0	1	2	0	2
PGM1	1187	1053	1785	1765	945	740	806	814	245	455	1513	1341	1206	957	88	653	1040	2159	4463	190	337	664	367	322	450	767	186	930	854	953	965	2943	2308	2028	1430	282	228	376	107	1318	1687	2891	206	60	56	1371	894	1565	1152
ROR1	17	9	29	757	411	327	72	87	120	221	540	538	530	624	73	361	308	315	1333	9	171	302	5	9	12	22	83	384	328	29	22	25	899	810	590	10	7	355	70	1067	929	1648	95	16	24	630	279	597	469
UBE2U	0	0	0	0	0	0	0	0	0	0	0	0	0	0	1	0	1	0	0	0	0	0	0	0	0	0	0	1	0	0	0	0	0	0	0	0	0	0	0	0	0	0	0	0	0	0	0	0	0
CACHD1	148	120	179	90	46	33	56	61	26	44	82	89	80	52	3	51	43	48	156	0	21	57	31	21	19	63	13	51	38	123	116	375	135	104	76	9	6	60	26	108	138	244	29	5	8	51	33	64	68
MIR4794	0	0	0	0	0	0	0	0	0	0	0	0	0	0	0	0	0	0	0	0	0	0	0	0	0	0	0	0	0	0	0	0	0	0	0	0	0	0	0	0	0	0	0	0	0	0	0	0	0
RAVER2	214	182	357	408	211	163	282	334	111	204	424	435	311	266	13	149	165	226	614	27	93	182	67	77	118	207	38	175	116	147	181	532	561	359	292	88	39	347	61	402	486	816	51	12	16	350	181	291	117
JAK1	1763	1592	2617	7888	4402	3393	1865	2050	1234	2386	7137	7218	6400	8501	773	5051	1790	2666	6880	336	1731	2945	427	430	466	932	702	3485	2609	1556	1829	4806	10517	8181	6343	629	397	3292	650	10163	9441	16993	1143	312	338	5473	2807	5188	5228
MIR3671	0	0	0	1	0	0	1	1	0	0	0	1	0	0	0	2	0	0	0	0	0	0	0	0	0	0	0	1	0	0	0	0	0	0	0	0	0	0	0	1	0	0	0	0	0	1	0	2	0
MIR101-1	0	0	0	0	0	0	0	0	0	0	1	0	0	0	0	0	0	0	0	0	0	0	0	0	0	0	0	0	0	0	0	0	0	0	0	0	0	0	0	0	0	0	0	0	0	0	0	0	0
AK4	1108	880	1487	550	303	197	646	797	64	136	410	413	370	844	81	492	557	822	2186	32	95	246	426	517	650	1388	134	664	594	819	899	2705	870	599	466	157	59	99	20	385	746	704	153	29	32	603	513	640	419
DNAJC6	86	58	150	172	86	97	36	37	38	92	161	188	167	198	20	116	30	44	157	0	78	116	19	18	17	46	20	128	95	78	60	208	204	189	151	14	8	109	21	182	142	291	32	16	12	65	34	75	298
LEPROT	875	879	2003	1294	746	525	1051	1122	309	608	1127	1236	1019	1730	189	1192	1054	1262	3409	39	286	575	383	374	483	1091	180	820	720	744	730	2296	1880	1246	935	319	141	626	133	1334	1684	2870	225	92	81	2258	1270	2024	737
LEPR	150	142	305	92	53	25	27	42	45	84	125	108	105	177	15	87	54	60	201	5	31	78	25	27	31	65	27	111	87	156	149	328	182	93	81	12	6	120	40	173	217	275	30	8	15	131	66	112	122
PDE4B	3	1	3	1018	556	410	809	800	137	325	1198	1175	1047	499	40	254	18	14	53	25	274	531	2	4	6	14	100	400	381	4	10	13	1685	1193	903	285	174	394	84	1271	1397	2162	284	77	86	320	220	394	987
SGIP1	0	3	0	0	0	1	0	0	0	0	0	0	0	0	0	0	0	0	0	0	0	0	0	2	1	1	0	0	0	2	2	9	0	0	0	0	0	0	0	0	0	0	0	0	0	1	2	0	0
MIR3117	0	0	0	0	0	0	0	0	0	0	0	0	0	0	0	0	0	0	0	0	0	0	0	0	0	0	0	0	0	0	0	0	0	0	0	0	0	0	0	0	0	0	0	0	0	0	0	0	0
TCTEX1D1	0	0	0	0	0	0	0	0	0	0	0	0	0	0	0	0	0	0	0	0	0	0	0	0	0	0	0	0	0	0	0	0	0	0	0	0	0	0	0	0	0	0	0	0	0	1	0	0	0
INSL5	0	0	0	0	0	0	0	1	0	0	0	0	0	0	0	0	0	0	0	0	0	0	0	0	0	0	0	0	0	0	0	0	0	0	0	0	0	0	0	0	0	0	0	0	0	0	0	0	0
WDR78	47	64	135	15	10	9	14	27	2	8	28	25	23	56	7	35	38	45	125	4	4	6	10	14	13	44	5	21	22	54	50	121	31	23	12	7	1	29	8	31	29	59	11	5	3	52	30	43	13
MIER1	415	347	799	404	215	166	293	312	119	242	415	402	410	707	63	460	189	177	525	17	124	262	114	126	170	454	89	487	333	266	331	897	663	387	276	93	42	457	79	560	793	1172	548	138	131	747	475	761	317
SLC35D1	414	476	829	423	221	169	251	264	66	154	327	299	309	413	39	257	61	82	234	11	89	197	154	173	227	493	51	265	234	344	326	902	532	345	263	68	42	157	34	459	394	676	106	32	38	116	40	80	303
C1orf141	0	0	0	0	0	0	0	0	0	0	0	1	0	0	0	0	0	0	0	0	0	0	1	0	0	0	0	0	0	0	0	0	0	0	0	0	0	0	0	0	0	0	0	0	0	0	0	0	0
IL23R	0	0	0	0	0	0	0	0	0	0	0	1	0	0	0	0	0	0	0	0	0	0	0	0	0	1	0	1	0	0	0	0	0	0	0	0	0	0	0	0	0	2	0	0	0	0	0	0	0
IL12RB2	16	12	11	7	5	1	5	4	0	0	0	1	0	1	0	0	1	0	0	0	0	0	5	8	9	14	2	1	2	17	8	23	2	4	3	2	3	3	0	0	0	2	0	0	0	0	0	0	0
SERBP1	5612	4555	7333	5827	3125	2409	3096	2918	1157	2605	4628	4590	4906	5101	505	2999	2403	3948	9142	546	1737	3004	2132	2113	2962	5884	608	2813	2346	5038	4723	13535	7876	6213	4619	829	540	3172	502	4340	4604	8272	908	265	231	5097	2688	4404	3407
GADD45A	5779	5446	8129	386	209	171	677	539	77	182	231	232	267	1942	205	1180	196	438	837	27	66	130	1533	1736	1542	2753	138	640	536	4780	5905	14920	476	466	343	222	103	234	45	1089	828	2175	928	283	234	2109	1205	2283	320
GNG12	1400	1370	3145	3715	1922	1295	1148	1261	815	1744	2530	2850	2638	2484	296	1567	1248	1207	4359	114	925	1825	712	745	1025	2218	327	1466	1301	1543	1226	4347	6104	3438	2725	347	166	2028	415	2357	3218	5162	527	169	151	1838	1092	1688	2046
GNG12-AS1	2	1	0	9	4	4	6	8	4	6	5	5	2	2	0	0	0	2	3	0	0	4	1	0	1	4	0	9	3	3	2	4	7	4	5	1	1	9	2	7	9	18	4	2	0	4	0	0	1
DIRAS3	0	1	0	6	0	0	2	8	0	1	10	4	7	0	0	0	55	104	254	0	2	1	1	1	1	0	0	2	3	0	2	0	8	5	2	0	0	1	0	2	1	5	0	0	0	142	66	143	1
WLS	931	864	1307	351	194	150	297	350	66	151	383	333	321	350	36	224	681	1107	2760	13	76	159	380	395	404	815	60	283	205	604	671	1845	428	399	303	160	76	90	27	509	448	738	52	16	7	904	480	914	361
MIR1262	0	0	0	0	0	0	0	0	0	0	0	0	0	0	0	0	0	0	0	0	0	0	0	0	0	0	0	0	0	0	0	0	0	0	0	0	0	0	0	0	0	0	0	0	0	0	0	0	0
RPE65	0	0	0	0	0	0	0	0	0	0	0	0	0	0	0	0	4	0	0	0	0	0	0	1	0	0	0	1	0	0	0	0	0	0	0	0	0	1	0	0	0	0	0	0	0	0	0	0	0
DEPDC1	63	66	150	705	340	182	107	115	201	454	705	761	740	43	3	23	339	385	1183	34	194	430	49	51	38	85	8	35	25	55	52	125	1179	600	460	14	9	750	136	569	757	1147	11	7	4	376	232	385	339
LRRC7	0	3	1	0	0	0	0	0	0	0	0	0	0	0	0	0	1	0	0	0	0	0	0	0	0	1	0	0	0	0	0	0	0	0	0	2	0	0	0	0	0	0	0	0	0	0	0	0	0
PIN1P1	0	0	0	0	0	0	0	0	0	0	0	0	0	0	0	1	0	0	0	0	0	0	0	0	0	0	0	0	0	0	0	0	0	0	0	0	0	0	0	0	0	0	0	0	0	0	0	0	0
LRRC40	133	168	463	423	214	125	170	144	115	224	405	468	479	221	22	118	152	147	677	2	115	232	96	109	170	456	36	160	133	138	141	423	692	400	278	29	15	342	59	378	568	899	70	11	24	287	151	240	218
SRSF11	4155	3573	4971	1574	858	579	2134	2164	412	1097	1326	1367	1543	1527	162	941	683	772	2099	101	444	759	673	693	882	1920	258	1252	1029	2677	3437	8938	2315	1670	1196	1053	394	812	174	1203	1559	2558	498	129	88	1467	958	1347	1010
ANKRD13C	243	233	350	280	158	140	243	233	77	138	282	309	297	411	50	263	226	218	706	6	115	187	125	110	171	383	45	255	195	209	190	608	465	365	268	64	35	145	32	303	385	658	122	29	27	457	252	398	264
HHLA3	125	130	156	51	21	16	265	155	14	32	84	75	58	99	7	72	69	173	306	34	13	41	30	39	29	47	6	82	41	85	125	279	63	68	34	70	43	49	2	114	130	230	12	5	5	196	77	206	50
CTH	48	47	74	59	32	17	150	106	11	35	78	82	67	43	5	52	72	112	289	8	15	31	20	21	24	52	6	34	31	37	36	129	102	69	63	38	12	44	6	96	80	158	27	4	6	880	418	800	68
PTGER3	0	0	0	0	0	0	0	0	0	0	0	0	0	0	0	0	1	0	0	0	0	0	0	0	0	1	0	0	0	0	1	3	1	0	0	0	0	0	1	0	0	0	3	2	2	4	0	1	0
ZRANB2-AS1	12	20	8	0	3	1	4	2	0	3	0	0	0	0	0	0	0	0	0	0	0	0	0	1	0	4	0	2	2	6	17	32	3	1	1	0	0	0	0	0	0	0	0	0	0	1	0	0	0
ZRANB2	1010	907	1967	679	350	264	601	570	172	424	847	906	929	1302	125	774	568	593	1655	21	235	397	233	241	462	1002	160	725	626	778	797	2277	1057	587	446	166	77	732	101	861	1149	1857	728	178	174	910	475	764	577
MIR186	0	0	0	0	0	0	2	1	0	0	2	3	1	2	0	0	0	1	12	0	0	0	0	0	2	1	0	2	4	0	0	0	0	1	0	0	0	0	0	6	3	19	2	0	0	5	0	2	2
ZRANB2-AS2	2	3	0	0	0	0	1	0	0	1	0	0	0	0	0	0	2	2	3	0	0	0	1	1	0	0	0	0	3	0	2	6	0	1	0	1	0	1	0	4	5	10	0	0	0	4	2	2	1
NEGR1	4	5	8	0	0	0	0	0	0	0	0	0	2	0	0	0	147	147	477	0	1	0	3	1	1	1	0	0	0	5	6	14	0	0	0	0	0	0	0	0	0	0	0	0	0	197	98	143	12
NEGR1-IT1	0	0	0	0	0	0	0	0	0	0	0	0	0	0	0	0	0	0	0	0	0	0	0	0	0	0	0	0	0	0	0	0	0	0	0	0	0	0	0	0	0	0	0	0	0	0	0	0	0
LRRIQ3	6	4	7	13	12	6	25	16	7	9	18	23	19	9	1	5	4	4	11	2	8	11	0	2	8	5	1	7	7	2	5	1	39	24	8	0	1	8	9	17	37	56	0	1	0	14	4	10	14
FPGT-TNNI3K	0	0	0	0	0	0	0	0	0	0	0	0	0	0	0	0	0	0	0	0	0	0	0	0	0	0	0	0	0	0	0	0	0	0	0	0	0	0	0	0	0	0	0	0	0	0	0	0	0
FPGT	80	79	164	209	103	54	125	121	36	86	175	192	185	79	12	38	90	100	334	9	60	96	42	48	124	243	13	76	61	36	53	176	287	164	136	34	21	123	28	206	294	443	23	3	7	146	92	156	82
TNNI3K	0	0	0	0	0	0	0	0	0	0	0	0	0	0	0	0	0	0	0	0	0	0	0	0	0	0	0	0	0	0	0	0	0	0	0	0	0	0	0	0	0	0	0	0	0	0	0	0	0
CRYZ	623	456	901	2145	956	819	1981	1639	459	1030	1791	1766	1670	3185	314	2052	1388	1564	4892	30	568	928	231	253	497	1010	308	1406	1424	410	440	1356	2973	1992	1479	579	261	1469	287	1182	1851	2710	484	137	154	1146	697	1211	1693
TYW3	414	406	839	406	189	133	279	272	99	216	396	428	444	894	68	559	287	444	1098	37	120	244	108	93	155	317	88	478	432	383	408	1210	648	397	321	109	59	360	39	428	418	759	192	54	44	539	320	499	748
LHX8	0	0	1	53	22	29	333	269	1	7	98	102	76	15	2	14	0	0	0	1	23	41	0	0	0	0	8	59	58	0	0	0	54	44	33	103	46	1	0	89	108	187	2	7	0	0	0	0	19
SLC44A5	61	76	139	9	7	8	56	70	4	9	9	4	7	77	7	29	36	42	151	0	4	5	20	29	43	78	12	39	31	40	54	130	11	5	0	19	2	2	1	11	22	30	22	1	5	65	29	58	1
ACADM	458	438	846	671	368	269	331	433	143	410	641	650	638	594	54	306	232	254	830	3	162	319	96	89	170	387	75	355	295	420	383	1100	1181	753	571	112	48	491	76	763	794	1476	103	24	28	432	203	406	438
RABGGTB	1552	1337	2480	1006	493	316	1768	1593	193	456	907	876	910	1498	148	780	522	834	1824	83	268	440	344	343	669	1372	182	880	741	1137	1493	3748	1551	1002	756	534	266	412	88	1282	1328	2476	509	104	98	1594	1010	1490	690
SNORD45C	0	0	1	7	2	0	6	2	2	0	1	6	4	17	0	5	0	0	1	0	1	1	1	1	6	11	1	5	5	1	1	0	5	3	4	0	0	3	1	14	7	24	9	1	0	2	0	2	7
SNORD45A	0	3	0	8	1	5	8	3	1	9	4	10	10	28	2	15	1	1	4	0	5	1	0	0	5	16	0	2	6	1	8	0	10	5	7	2	1	5	2	12	14	29	8	3	2	4	2	3	5
SNORD45B	0	0	0	5	8	4	4	7	0	3	5	7	1	14	2	12	6	1	4	0	1	5	1	0	5	12	0	12	8	1	0	0	6	3	3	1	1	1	0	5	6	5	2	4	2	2	7	3	3
MSH4	0	2	7	3	2	1	2	1	3	0	0	1	1	5	0	0	0	1	2	0	1	1	0	0	0	2	0	7	1	0	3	4	2	3	1	0	0	7	0	1	2	0	2	0	0	1	3	5	1
ASB17	0	1	0	0	0	0	0	0	0	0	0	0	0	0	0	0	1	0	0	0	0	0	0	0	1	0	0	0	1	0	0	0	0	0	0	0	0	0	0	1	0	0	0	0	0	2	0	0	0
ST6GALNAC3	0	1	1	19	6	3	5	0	3	3	25	32	30	0	0	0	10	18	46	4	3	21	0	0	0	0	2	14	12	0	1	0	29	17	11	4	0	6	2	76	53	121	0	0	0	49	33	39	16
ST6GALNAC5	47	30	61	1	0	0	0	0	0	0	1	0	0	0	0	0	16	16	59	0	0	0	17	22	52	87	0	0	0	28	35	70	0	0	0	0	0	0	0	3	1	1	0	0	0	115	63	100	0
PIGK	279	275	455	620	369	215	416	419	136	294	609	615	601	360	47	218	489	663	1844	18	155	334	95	110	154	335	60	393	275	231	236	668	1196	745	541	139	52	570	80	877	819	1453	48	17	10	841	484	692	450
AK5	0	0	1	162	102	61	43	25	30	65	150	116	120	56	5	26	0	0	2	35	40	62	0	0	0	1	15	44	36	1	0	1	210	173	122	15	14	82	13	189	164	362	3	0	2	3	0	0	60
ZZZ3	557	472	871	600	276	237	182	268	108	284	539	568	581	616	49	344	256	339	990	4	155	309	154	138	205	420	71	332	277	391	474	1297	951	563	453	75	34	357	54	845	934	1713	174	37	33	751	400	654	475
USP33	287	360	674	766	419	299	485	502	181	446	841	781	721	865	70	480	405	475	1533	15	199	370	156	169	313	603	114	545	448	263	315	780	1288	838	692	183	69	634	110	999	1191	1844	199	43	53	1078	635	981	688
NEXN	345	364	571	130	88	39	41	50	10	30	58	62	98	186	19	88	83	79	184	3	21	30	57	76	38	93	15	72	80	243	318	825	202	145	119	13	4	46	4	101	78	184	18	6	8	175	91	126	75
FUBP1	3424	2867	4609	2818	1511	1256	2209	1691	734	1597	3366	3159	3060	2514	198	1393	1056	1582	3972	77	874	1525	665	724	790	1442	357	1643	1312	2405	2936	8203	3954	3098	2379	687	404	1594	183	2021	2169	4025	682	194	221	2254	1133	2030	2179
DNAJB4	244	301	656	392	197	110	135	200	103	263	359	351	390	586	69	340	103	88	249	1	118	256	73	104	193	459	104	636	475	174	221	568	664	364	259	33	18	409	52	291	254	482	251	73	72	536	363	529	744
GIPC2	7	8	10	1	0	0	0	1	0	0	1	1	1	0	0	0	26	29	62	0	0	0	1	4	4	19	0	3	1	1	5	4	1	1	0	0	0	0	1	0	0	0	0	0	0	32	14	20	2
MGC27382	0	0	0	0	0	0	0	0	0	0	0	0	0	0	0	0	0	0	3	0	0	0	0	0	1	1	0	0	0	0	0	0	0	0	0	0	0	0	0	0	0	0	0	0	0	0	0	1	0
PTGFR	1	3	0	0	0	0	0	1	0	0	0	0	0	0	0	0	3	3	6	0	0	0	0	0	1	5	0	0	0	1	0	0	0	0	0	0	0	1	0	0	0	0	0	1	0	7	7	7	3
IFI44L	23	70	29	0	0	0	16	39	2	7	1	0	1	0	0	0	120	151	430	0	0	0	8	0	6	11	0	12	2	128	163	586	24	15	9	253	108	2	0	3	0	9	0	0	0	3810	2146	3342	112
IFI44	169	156	249	1	2	0	57	62	2	7	5	4	2	1	0	0	478	686	1501	0	0	2	12	14	32	60	3	11	6	248	278	816	52	40	24	416	258	11	1	14	10	24	7	0	0	7357	4204	6250	521
MIR548AP	0	0	0	0	0	0	0	0	0	0	0	0	0	0	0	0	0	0	0	0	0	0	0	0	0	0	0	0	0	0	0	0	0	0	0	0	0	0	0	0	0	0	0	0	0	0	0	0	0
TTLL7	100	78	144	150	75	51	67	69	27	73	113	115	115	109	13	74	11	22	57	3	36	65	22	18	24	59	15	67	44	81	91	234	195	147	109	21	11	67	12	150	198	272	18	3	2	26	28	35	92
PRKACB	140	138	260	418	209	157	204	271	132	295	400	427	410	512	45	300	330	371	1113	17	107	256	118	114	226	463	43	305	246	93	85	250	596	390	329	52	26	379	72	486	548	956	107	30	27	350	240	339	312
SAMD13	9	2	10	26	9	11	35	37	2	15	13	23	22	18	2	8	20	33	73	0	4	5	4	2	2	10	1	6	4	3	5	3	19	21	23	5	4	12	0	33	45	64	2	4	1	23	19	28	2
UOX	0	0	0	2	1	0	0	0	0	0	0	0	0	0	0	0	1	0	0	0	0	0	0	0	0	0	0	0	1	0	0	3	0	1	0	0	0	0	0	0	0	0	0	0	0	3	0	3	0
DNASE2B	0	0	0	0	0	0	0	1	0	0	0	0	0	0	0	0	0	0	0	0	0	1	0	0	0	0	0	1	1	0	0	0	0	0	0	0	0	0	0	0	0	2	1	0	0	0	0	0	0
RPF1	365	362	733	455	277	154	368	425	125	354	498	538	551	631	55	345	319	525	1236	87	186	290	237	232	382	729	65	328	259	397	390	1103	883	556	454	167	93	470	96	506	511	1121	120	27	21	626	333	483	514
GNG5	412	488	970	1429	824	528	2433	1751	284	598	1225	1329	1118	1345	121	973	1264	2222	4157	403	373	619	435	561	885	1584	167	734	559	431	383	1283	1905	1529	1070	1074	510	946	208	1103	1439	2929	366	93	86	2336	1311	2316	1061
CTBS	54	100	158	211	114	93	254	302	41	118	219	240	208	167	13	116	279	340	857	6	60	122	51	68	98	199	33	133	111	80	58	171	402	242	193	66	49	152	25	343	489	684	52	16	20	539	367	598	160
SSX2IP	135	175	343	467	246	125	152	153	98	239	465	427	393	301	22	166	305	320	834	21	105	242	93	88	139	232	51	253	172	94	135	326	787	491	371	52	23	418	67	456	539	823	58	28	20	433	214	358	240
LPAR3	209	206	429	6	0	1	8	1	0	3	3	5	5	1	0	6	71	97	315	0	0	1	128	120	198	340	1	1	2	162	165	581	5	7	2	1	0	0	1	13	21	13	0	0	0	116	62	156	4
MCOLN2	30	24	44	103	51	38	86	96	18	54	118	96	88	57	6	43	91	122	351	14	25	35	18	24	32	45	4	40	24	21	21	47	145	90	74	35	19	63	12	138	166	220	8	1	4	136	101	133	68
MCOLN3	198	216	325	159	116	58	156	190	31	62	125	123	134	115	10	79	47	92	199	2	27	66	42	50	87	181	10	106	71	110	141	357	244	151	93	45	19	72	18	190	269	401	21	11	3	58	44	61	46
WDR63	98	100	171	17	6	5	21	38	6	8	9	9	10	187	12	78	3	2	4	1	2	4	12	18	14	42	14	60	57	55	66	219	9	12	12	2	0	20	0	2	7	11	44	12	18	2	3	0	5
MIR4423	0	0	1	0	0	0	1	0	0	0	0	0	0	0	0	1	0	0	0	0	0	0	0	0	0	0	1	0	0	0	1	0	1	0	0	0	0	0	0	0	0	0	0	0	0	0	0	0	0
SYDE2	48	50	66	63	42	20	17	23	15	25	47	42	34	54	0	25	25	25	93	0	18	16	18	18	13	46	4	25	11	28	29	70	75	46	44	3	3	34	4	87	76	135	12	5	6	83	46	76	35
C1orf52	186	126	268	187	108	68	137	166	35	88	230	205	191	325	28	197	158	289	594	16	68	114	107	95	156	329	54	184	163	150	152	405	279	191	149	66	32	161	19	237	259	492	153	43	31	490	276	428	192
BCL10	264	261	445	175	105	74	183	192	68	103	225	208	199	444	43	281	360	541	1315	35	63	119	166	140	262	524	57	297	236	200	271	674	271	174	151	61	38	139	40	285	376	654	348	69	58	1586	950	1477	428
LOC646626	26	16	21	1	0	0	0	2	0	0	2	0	2	4	0	3	1	12	25	0	0	0	2	1	2	6	0	2	1	3	8	32	1	0	0	1	0	1	0	0	1	2	1	0	1	19	5	13	1
DDAH1	97	67	137	252	127	108	80	116	47	99	227	254	219	867	99	608	843	949	3223	25	68	175	44	44	61	153	53	380	292	78	75	252	354	227	190	30	10	143	20	316	459	671	107	34	32	1735	1039	1583	181
CYR61	1835	1720	2940	1238	711	587	2094	1725	147	236	691	698	652	2027	201	1496	1898	3885	7458	50	219	291	1172	1202	1675	3241	164	814	684	1791	2010	6098	1538	1499	1196	465	359	324	92	2739	1916	4355	325	90	81	14111	7310	14089	898
ZNHIT6	642	579	976	492	274	146	366	427	135	369	537	505	595	782	61	449	365	652	1546	29	154	306	144	150	183	486	86	372	305	534	585	1747	861	553	414	110	74	416	79	739	658	1335	187	43	47	1449	704	1192	426
COL24A1	2	2	1	0	0	0	8	13	1	3	2	1	2	19	4	13	1	0	2	0	0	1	0	0	0	1	0	6	2	4	2	12	2	2	2	5	1	5	0	1	0	0	0	3	0	1	0	0	0
ODF2L	338	351	782	245	126	93	292	285	46	125	206	194	250	224	20	124	206	257	543	10	51	116	158	141	272	563	53	191	147	327	383	946	442	247	202	106	43	271	34	313	418	813	61	15	10	327	217	250	147
CLCA2	3889	3675	6184	1	0	0	0	0	0	1	0	0	0	8	1	7	0	0	0	0	2	0	576	520	938	1926	0	0	2	2336	2531	6683	1	0	1	0	0	0	0	1	0	0	0	0	0	0	3	0	1
CLCA1	0	1	0	0	0	0	0	0	0	0	0	0	0	0	0	0	0	0	0	0	0	0	0	0	0	0	0	0	0	0	0	1	0	0	0	0	0	0	0	0	0	0	0	0	0	0	0	0	0
CLCA4	255	201	327	0	0	0	0	0	0	0	0	0	0	0	0	0	6	2	4	0	0	0	22	21	89	145	0	0	0	152	163	458	0	0	0	0	0	0	0	0	0	0	0	0	0	3	8	6	0
CLCA3P	5	3	17	0	0	0	0	0	0	0	0	0	0	0	0	0	4	4	8	2	0	0	1	7	7	24	0	2	0	9	4	14	0	0	0	0	0	0	0	0	0	0	0	0	0	8	5	9	0
SH3GLB1	1732	1590	2874	983	447	383	906	985	220	501	883	901	848	984	86	684	611	926	2187	76	292	502	575	695	1065	2073	219	996	825	1435	1596	4366	1510	954	759	419	224	585	118	1071	1445	2264	273	90	80	1714	1054	1647	914
HS2ST1	174	201	363	764	356	233	568	748	122	329	754	722	666	568	74	375	768	856	2627	29	175	405	91	112	178	452	155	757	695	141	150	425	1296	705	551	180	108	299	63	883	1178	1691	153	44	62	1119	676	916	449
LMO4	244	227	386	474	234	195	342	358	107	227	562	503	462	355	33	285	703	1208	2802	38	114	207	146	130	174	325	61	232	227	186	176	414	550	439	330	117	51	175	39	579	528	1010	93	27	28	1074	660	1203	253
PKN2	674	711	1332	957	448	310	199	275	223	479	901	1050	962	903	95	545	713	508	2264	6	257	523	201	175	327	753	139	712	567	529	598	1839	1460	830	656	64	36	760	146	1104	1532	2207	315	88	65	1686	1093	1571	788
GTF2B	508	431	691	402	216	174	499	435	69	180	426	383	395	479	31	262	419	781	1625	30	112	174	159	177	301	540	64	296	222	389	454	1151	625	465	325	178	100	199	24	339	375	790	162	45	41	1314	717	1266	466
RBMXL1	265	221	366	152	74	67	91	119	33	64	141	167	149	163	11	129	397	497	1390	9	38	81	54	55	91	191	32	123	114	164	216	594	231	163	112	42	21	115	15	169	178	322	83	15	22	929	524	909	146
GBP3	980	872	1442	119	70	38	151	173	8	21	96	105	114	95	6	61	686	767	2363	6	28	56	136	147	207	441	48	204	180	838	960	2570	272	194	134	150	72	38	5	302	275	516	22	9	12	3975	2236	3474	896
GBP1	209	255	350	57	28	17	59	63	1	5	33	44	46	145	14	97	148	187	499	3	18	17	49	31	42	90	27	161	122	267	287	724	128	116	70	192	97	3	0	125	139	270	30	7	4	4645	2418	4302	1894
GBP2	54	59	79	123	49	29	578	497	13	18	98	84	97	544	41	307	451	810	1604	24	22	55	7	2	8	4	46	233	209	60	47	96	180	125	106	328	166	7	0	256	295	553	94	20	26	2223	1301	2347	586
GBP7	0	0	1	2	5	3	18	22	0	1	0	0	0	0	0	0	0	0	1	0	0	0	0	0	0	0	1	1	13	0	0	0	6	5	2	8	8	0	0	0	0	0	0	0	0	7	1	11	3
GBP4	14	20	44	4	2	1	23	13	2	6	5	4	5	0	0	0	62	76	271	0	1	3	0	0	0	0	4	9	3	10	15	36	2	3	4	43	31	7	1	27	35	65	0	0	0	2691	1404	2593	463
GBP5	9	18	7	1	1	2	1	4	0	0	0	1	1	1	0	0	2	0	3	0	0	0	8	6	3	11	1	13	1	39	27	94	3	2	0	15	14	3	0	4	3	4	1	0	0	117	55	117	162
GBP6	1656	1544	2460	0	0	0	0	0	0	0	0	0	0	0	0	0	0	4	13	0	0	0	368	352	557	1106	0	0	0	998	1117	3526	0	0	0	0	0	0	0	0	0	0	0	0	0	21	15	18	0
GBP1P1	9	27	16	0	0	0	0	3	0	0	0	0	0	0	0	0	0	0	1	0	0	0	2	4	3	6	0	0	0	5	15	24	0	1	0	9	7	1	0	4	1	2	0	0	0	24	19	44	8
LRRC8B	48	62	101	264	142	100	101	125	68	136	281	310	286	449	53	263	290	408	1122	6	90	168	40	30	47	134	73	305	262	55	70	178	412	306	169	31	15	156	35	393	443	655	99	22	32	978	510	871	172
LRRC8C	253	210	457	570	278	193	115	124	80	185	560	558	487	116	18	54	80	102	291	21	133	220	257	312	284	683	16	107	92	231	230	714	898	515	410	45	17	268	44	1191	1352	1984	45	10	14	203	114	214	417
LRRC8D	401	378	693	1451	729	494	867	935	333	666	1257	1260	1056	972	104	607	309	351	895	85	396	589	221	230	438	907	101	478	416	373	361	1135	2018	1352	959	262	177	898	188	1771	1560	3201	207	65	66	740	415	682	706
GEMIN8P4	9	2	11	44	25	22	75	60	9	27	49	59	53	43	2	32	23	89	151	11	20	23	5	3	4	11	8	32	22	5	2	17	73	43	40	14	17	12	2	23	38	70	16	4	2	62	39	89	34
ZNF326	858	745	1101	752	431	290	706	667	245	701	837	739	992	658	63	348	250	354	941	25	268	533	165	165	234	423	81	326	283	593	696	1845	1331	938	741	288	94	656	92	652	646	1295	178	44	47	565	249	453	714
BARHL2	0	0	0	0	0	0	0	0	0	0	0	0	0	0	0	0	2	0	0	0	0	0	0	0	0	0	0	0	0	0	0	0	0	0	0	0	0	0	0	0	0	0	0	0	0	0	0	2	0
ZNF644	451	434	999	456	257	184	228	247	106	273	432	434	459	778	71	442	381	309	1171	2	155	284	142	128	195	466	110	554	435	380	385	1071	808	464	340	68	34	498	78	538	685	1137	313	77	72	1288	751	1025	369
HFM1	0	2	1	2	2	3	3	4	2	3	4	3	6	2	2	7	0	0	0	1	0	2	0	0	0	0	0	3	4	0	0	0	5	2	0	0	0	7	0	17	25	39	0	0	0	0	0	0	0
CDC7	96	81	186	326	171	118	157	199	73	220	356	383	347	123	14	72	146	165	522	14	121	181	47	68	50	82	24	76	55	65	72	239	601	382	258	43	23	261	33	244	262	516	34	7	4	272	155	211	103
TGFBR3	29	34	33	215	121	96	175	219	77	137	215	197	178	300	14	185	98	109	450	11	65	136	5	17	15	46	37	159	146	20	20	64	358	268	196	56	24	209	44	197	225	367	86	19	30	221	111	217	188
BRDT	0	0	0	0	0	0	0	0	0	0	0	0	0	0	0	0	0	0	2	0	0	0	0	0	0	0	0	0	0	0	0	0	0	0	0	0	0	0	0	0	0	0	0	0	0	0	0	0	0
EPHX4	10	11	32	19	2	1	4	7	3	10	12	5	5	7	0	3	57	111	283	0	2	6	11	9	36	71	0	7	2	10	12	28	15	17	9	1	1	3	0	14	8	13	1	2	2	117	52	127	8
BTBD8	11	5	17	16	9	9	0	0	5	10	10	8	14	12	1	4	4	6	39	0	5	13	1	0	1	6	0	7	3	13	7	17	31	10	12	0	1	14	1	24	38	29	0	0	2	25	10	14	3
KIAA1107	70	78	163	71	32	22	59	68	26	55	71	80	87	36	3	25	47	57	168	1	19	45	18	19	14	39	5	17	27	68	58	184	117	74	52	27	8	82	13	182	205	297	6	1	0	141	83	127	45
C1orf146	0	0	0	0	0	0	0	1	0	0	0	0	0	0	0	0	0	0	0	0	0	0	0	0	1	0	0	0	0	0	0	0	0	0	0	1	0	4	0	0	0	0	0	0	0	0	0	0	0
GLMN	23	23	79	175	91	22	105	116	37	74	150	155	148	110	11	73	105	122	302	21	53	95	38	41	98	225	21	89	80	21	28	73	317	129	96	22	16	115	29	155	183	300	44	5	10	128	82	112	88
RPAP2	121	147	301	223	129	77	159	149	51	142	247	212	209	253	26	127	118	168	321	26	40	93	55	67	128	272	32	155	83	123	146	315	420	229	170	50	24	177	27	382	464	724	88	13	26	357	207	277	103
GFI1	5	1	0	6	3	4	3	1	3	2	7	5	5	4	0	1	1	3	3	0	0	2	2	2	3	4	0	2	3	2	0	21	7	4	1	4	3	2	0	9	7	14	2	0	0	5	4	11	1
EVI5	403	344	716	215	103	87	112	145	58	106	230	228	214	204	17	115	110	117	361	3	58	118	137	141	252	555	38	208	139	338	318	1022	319	190	154	24	27	143	21	305	342	489	55	11	22	282	133	272	216
RPL5	11383	9399	16683	14310	7990	6018	20328	17974	2754	6075	12225	11241	11177	14513	1388	9401	6605	11929	24137	3502	3086	5334	4771	5065	7494	12959	1911	8604	7251	8775	9154	28935	20942	14759	10890	5604	3790	7422	1408	17054	19267	34262	2907	757	811	15761	9428	15670	6478
FAM69A	320	322	654	387	207	123	278	347	87	198	432	464	410	653	63	459	131	139	418	35	121	213	159	183	293	623	85	358	334	283	331	786	739	422	309	67	65	255	60	423	515	864	141	34	34	184	116	160	386
SNORD21	1	0	4	3	1	2	3	7	0	3	3	0	1	2	0	3	1	1	2	0	0	0	0	0	2	3	0	0	1	1	1	3	5	4	2	0	0	1	0	0	5	5	3	2	3	5	1	2	0
SNORA66	4	2	2	4	1	0	19	8	0	1	1	5	4	9	1	5	1	3	6	0	1	1	0	0	2	5	1	1	1	0	1	2	4	3	0	4	0	0	0	8	1	3	6	1	1	8	3	10	1
MTF2	210	189	393	379	180	152	254	218	80	181	341	362	325	481	54	303	282	320	793	9	100	178	97	115	162	328	72	398	285	188	198	535	632	431	293	74	25	192	50	283	340	586	175	40	53	654	385	611	194
TMED5	547	644	1062	951	497	315	468	645	175	461	891	882	915	1353	200	906	808	745	2523	30	281	604	203	222	411	908	269	1385	1253	455	454	1485	1663	982	777	169	64	858	175	895	1505	2229	384	115	130	1109	669	895	1348
CCDC18	59	45	133	284	152	71	173	241	57	146	216	219	259	57	6	33	118	133	395	12	73	109	43	36	46	90	15	44	44	46	43	154	552	359	232	39	16	236	28	147	166	331	18	0	1	136	70	94	117
DR1	591	545	1055	620	375	260	206	151	187	312	600	603	550	730	72	464	377	475	1428	27	175	337	236	262	405	899	108	480	442	463	479	1356	864	687	560	75	41	373	74	491	718	1162	322	84	87	659	443	635	407
FNBP1L	1328	1227	2525	883	451	318	457	608	228	479	1003	1042	1044	825	80	478	859	976	3171	20	306	552	192	258	274	640	94	543	437	1060	1148	3231	1473	946	666	113	38	579	73	978	1463	2189	170	46	80	2117	1275	1880	518
BCAR3	965	851	1362	1023	671	526	269	255	191	373	1051	950	925	536	55	370	162	234	549	29	267	409	592	571	557	1167	38	205	185	970	881	2845	1176	1070	829	126	83	342	119	1323	1362	2531	133	34	20	793	394	794	982
LOC100129046	3	2	0	3	1	5	9	15	0	0	2	0	3	5	0	6	4	20	30	0	1	0	2	2	0	0	0	2	1	1	2	17	3	1	2	1	1	3	1	0	0	0	4	1	0	18	7	13	0
MIR760	0	0	0	1	1	0	0	0	1	0	0	1	0	0	0	0	0	0	0	0	0	0	0	0	0	0	0	0	0	0	0	0	0	1	0	0	0	0	0	0	0	0	0	0	0	0	0	0	0
DNTTIP2	900	865	1722	1485	734	531	1226	1355	279	675	1173	1173	1042	2030	162	1085	699	1088	2366	226	341	604	439	482	853	1638	288	1375	1034	853	929	2628	2525	1700	1205	481	209	885	186	1030	1044	2077	599	133	140	1821	1171	1685	1470
GCLM	545	504	761	3315	1696	1525	1484	1465	884	1915	2344	2187	1994	1872	222	1271	154	264	496	86	744	1234	141	192	281	582	228	1127	834	436	461	1265	4420	3310	2583	351	208	1935	383	2261	1971	3464	420	139	131	308	157	312	1256
ABCA4	3	11	15	5	7	1	3	2	0	2	2	4	7	19	4	7	0	3	6	0	3	3	1	4	1	3	0	2	0	7	7	26	2	4	2	3	0	0	0	6	1	4	0	0	1	2	1	5	2
ARHGAP29	504	543	1171	1649	801	551	435	430	361	708	1242	1333	1200	1805	173	1087	940	961	3349	20	347	642	270	232	423	928	122	613	465	365	383	1301	2376	1532	1067	144	71	1060	204	1555	1798	3195	305	109	95	2802	1492	2263	517
ABCD3	358	407	882	1083	490	377	459	498	241	486	970	1034	926	1306	108	776	569	710	2187	67	284	579	163	165	282	616	175	776	604	370	310	877	1817	1138	797	100	58	729	123	674	675	1293	336	94	92	885	543	744	503
F3	9600	8527	13395	71	43	46	115	104	11	21	41	33	44	170	5	113	2484	4016	9300	4	11	25	6979	7711	10772	22086	61	309	312	10120	11091	31900	93	84	79	60	40	19	9	68	319	141	50	11	2	18358	9521	15626	117
SLC44A3	187	176	285	84	57	30	167	138	11	35	94	100	78	110	3	64	367	600	1305	17	25	42	75	95	123	212	15	72	70	131	151	354	135	80	73	28	20	32	6	78	92	134	27	3	1	464	271	513	40
CNN3	2177	1822	2740	2172	1125	916	1306	1068	355	813	2439	2414	2373	1564	151	969	1553	2182	5930	62	643	1103	544	592	574	1188	221	962	853	1478	1763	4972	3043	2315	1724	330	215	1245	212	948	1221	2118	260	65	71	1857	1070	1785	1087
LOC729970	9	7	9	54	30	23	55	55	13	22	63	51	47	34	6	11	18	53	93	13	17	18	0	3	1	1	1	16	18	0	7	12	72	52	45	19	13	21	6	52	51	70	5	0	0	30	19	41	19
ALG14	70	75	122	201	93	77	185	194	28	68	221	175	141	280	27	173	59	122	248	28	57	79	49	48	88	148	26	152	122	74	78	194	293	189	159	49	40	113	15	127	99	232	23	11	11	70	46	74	78
TMEM56	1	2	8	654	319	301	277	241	105	208	473	534	464	246	27	201	339	323	959	44	166	325	3	1	3	1	38	252	243	1	3	4	834	555	423	40	30	346	71	431	642	957	47	11	11	537	309	423	158
TMEM56-RWDD3	0	0	0	17	12	9	3	7	1	10	8	10	11	5	1	2	5	2	15	0	5	4	0	0	0	6	0	2	1	1	0	0	15	9	13	0	1	2	0	7	12	14	0	0	0	7	5	2	2
RWDD3	12	19	59	112	61	19	122	133	27	47	119	126	109	115	8	48	127	167	362	12	24	72	18	11	57	126	23	72	72	26	20	70	178	89	54	21	13	75	12	124	185	443	34	9	8	211	135	188	71
PTBP2	95	154	270	218	117	71	247	277	57	116	235	286	281	279	26	164	99	122	308	6	58	160	16	21	38	75	36	174	123	86	89	264	378	212	165	51	20	179	24	253	337	567	127	28	23	322	220	346	111
DPYD	56	31	76	150	50	33	37	56	21	42	115	109	123	45	10	27	122	171	494	4	31	51	10	10	12	36	36	161	143	43	43	90	178	148	90	16	18	44	14	256	253	443	16	4	2	228	106	203	213
DPYD-AS1	1	0	0	0	0	0	0	0	0	0	0	0	0	0	0	0	0	0	0	0	0	0	0	0	0	0	0	0	1	0	0	0	1	0	0	0	0	0	0	0	0	0	0	0	0	0	0	0	0
MIR137HG	0	0	3	4	1	2	8	5	0	2	2	4	1	4	0	3	4	0	1	0	0	0	0	0	0	0	1	9	7	0	0	0	6	4	3	6	1	0	0	3	12	11	1	0	0	2	1	1	4
MIR2682	0	0	0	1	1	3	1	1	1	0	1	1	0	2	1	2	0	0	0	0	0	1	0	0	0	0	1	0	0	0	0	0	2	1	2	1	0	1	0	0	2	1	1	0	0	1	0	0	1
MIR137	0	0	0	0	0	0	0	0	0	0	0	0	0	0	0	0	0	0	0	0	0	0	0	0	0	0	0	0	0	0	0	0	0	0	0	0	0	0	0	0	0	0	0	0	0	0	0	0	0
SNX7	438	455	848	685	340	205	302	422	141	291	648	594	593	367	35	197	351	469	1073	68	203	308	167	158	264	469	76	305	256	351	395	1048	994	653	486	111	64	311	74	653	703	1117	75	30	20	412	261	429	405
LOC100129620	0	0	0	0	0	0	0	0	0	0	0	0	0	0	0	0	0	0	0	0	0	0	0	0	0	0	0	0	0	0	0	0	0	0	0	0	0	0	0	0	0	0	0	0	0	0	0	0	0
PALMD	285	258	435	34	24	14	44	47	1	0	65	56	46	82	9	59	216	271	626	4	17	21	80	62	80	140	13	68	76	141	197	527	56	37	25	15	9	1	0	45	59	112	33	8	13	115	108	129	13
MIR548AA1	0	0	0	0	0	0	0	0	0	0	0	0	0	0	0	0	0	0	0	0	0	0	0	0	0	0	0	0	0	0	0	0	0	0	0	0	0	0	0	0	0	0	0	0	0	0	0	0	0
MIR548D1	2	1	0	0	0	0	0	0	0	0	0	0	0	0	0	0	0	0	0	0	0	0	0	0	0	0	0	0	0	3	2	1	0	0	0	0	0	0	0	0	0	0	0	0	0	0	0	0	0
FRRS1	103	138	206	50	32	26	28	31	9	15	59	59	57	68	8	44	226	287	994	0	18	35	72	60	68	129	23	76	73	84	91	181	99	67	61	6	6	16	6	109	118	217	36	9	8	338	176	365	87
AGL	444	460	802	425	198	138	183	176	90	212	382	412	350	371	44	218	99	88	370	8	105	229	113	111	221	471	46	255	190	357	354	1058	543	347	282	37	24	227	50	474	585	743	85	34	30	180	92	167	245
SLC35A3	189	266	631	314	192	87	197	234	71	144	260	245	277	269	25	158	244	193	701	6	102	161	82	96	188	386	56	216	186	195	195	629	543	291	201	32	19	165	42	379	558	748	71	15	27	459	230	371	219
SASS6	62	83	179	258	137	80	69	82	80	150	272	256	285	65	9	30	96	71	239	2	92	170	40	46	51	91	10	76	49	55	56	147	483	291	182	14	8	316	29	193	263	480	34	6	10	175	92	143	146
TRMT13	184	174	270	144	86	58	99	117	34	87	195	162	211	199	36	150	61	66	212	6	54	92	32	37	58	181	19	118	83	120	139	466	223	156	103	30	7	136	27	279	355	609	90	28	24	195	131	194	149
LRRC39	5	15	10	3	1	0	3	6	2	3	3	5	6	6	1	0	2	14	8	0	0	2	2	1	6	9	0	4	3	7	15	20	4	1	0	5	7	13	1	1	2	6	2	1	0	5	6	4	3
DBT	465	453	876	282	174	132	157	165	85	164	292	296	268	356	34	239	121	152	483	16	90	162	114	109	195	396	45	208	169	390	400	1083	485	277	218	53	20	194	34	403	454	653	54	14	22	251	141	240	213
RTCA	791	772	1573	603	329	230	528	510	139	332	475	474	461	578	57	331	177	256	607	46	157	249	399	375	656	1303	72	337	267	918	797	2140	808	577	454	216	103	395	87	878	889	1534	99	38	28	386	251	364	488
MIR553	0	0	0	1	1	0	0	0	0	1	0	0	0	0	0	0	0	0	0	0	0	0	0	0	1	1	0	0	0	1	0	1	0	0	0	0	0	0	0	0	0	0	0	0	0	0	0	0	0
CDC14A	17	23	58	116	56	27	39	31	17	63	94	91	69	59	1	21	24	32	103	0	29	39	8	8	7	22	2	31	29	16	19	44	165	109	89	8	8	110	12	142	179	256	19	9	9	179	94	189	71
GPR88	0	0	0	1	0	0	0	0	0	0	1	0	0	0	0	0	0	0	0	0	0	0	0	0	0	0	0	0	0	0	0	0	1	2	1	0	0	0	0	0	0	0	0	0	0	0	0	0	0
VCAM1	0	0	0	3	0	2	15	16	0	1	2	6	3	1	0	0	2	2	15	0	3	2	0	0	0	0	1	3	1	0	0	0	5	0	3	4	3	0	0	2	4	14	0	0	0	118	90	168	2
EXTL2	73	82	150	342	157	115	228	244	65	142	363	371	295	206	26	124	188	191	537	6	68	171	58	64	96	198	40	174	163	48	44	126	557	316	263	46	25	156	38	362	376	600	34	32	4	206	121	211	164
SLC30A7	243	227	482	254	148	72	177	237	84	139	247	311	259	500	50	281	231	298	805	23	78	200	113	139	253	549	74	406	320	227	192	602	384	230	121	50	17	210	46	378	531	821	199	47	52	473	263	401	390
DPH5	395	350	628	513	259	214	697	631	114	260	604	462	457	423	49	263	152	286	519	95	115	207	120	103	208	332	49	199	149	302	372	1026	892	523	436	163	100	343	60	1065	1117	2018	89	17	19	333	180	300	194
S1PR1	29	26	37	1	1	1	1	0	0	0	1	0	0	1	1	0	0	0	2	0	0	2	6	8	12	20	2	1	1	18	15	62	2	1	3	0	1	0	0	5	3	7	0	0	0	1	0	1	7
OLFM3	0	0	0	0	0	0	0	0	0	0	0	0	0	0	0	0	0	0	0	0	0	0	0	0	0	0	0	0	0	0	0	0	0	0	0	0	0	0	0	0	0	1	0	0	0	1	2	1	0
DNAJA1P5	0	0	0	0	0	0	0	0	0	0	0	0	0	0	0	0	0	0	1	0	0	0	0	0	0	0	0	0	0	0	0	0	0	0	0	0	0	0	0	0	0	0	0	0	0	0	0	0	0
COL11A1	0	2	1	115	55	31	8	16	1	1	123	101	118	2	0	0	0	0	0	1	21	49	0	1	18	13	22	128	101	1	1	8	146	108	81	10	7	2	0	93	196	276	0	0	0	0	0	0	43
RNPC3	194	259	433	158	84	64	132	152	43	89	153	129	137	151	17	100	32	57	144	6	41	71	35	38	68	157	21	118	83	160	160	427	250	156	127	43	10	183	26	128	143	267	83	14	17	87	48	82	78
AMY2B	44	53	67	12	5	7	65	55	3	6	10	16	13	11	2	7	13	39	80	3	7	11	14	10	20	32	5	11	18	38	45	110	27	21	10	19	9	12	0	22	36	73	3	2	0	46	40	56	7
ACTG1P4	2	0	0	4	0	0	0	0	0	0	1	0	2	0	0	0	1	1	3	0	0	1	1	0	1	0	0	0	1	1	0	1	3	0	0	0	0	1	0	1	2	1	0	0	0	1	3	0	0
AMY2A	0	0	1	0	0	0	0	0	0	0	0	0	0	0	0	0	0	0	0	0	0	0	0	0	0	0	0	0	0	0	0	1	0	0	0	0	0	0	0	0	0	0	0	0	0	0	0	0	0
AMY1A	0	0	0	0	0	0	0	0	0	0	0	0	0	0	0	0	0	0	0	0	0	0	0	0	0	0	0	0	0	0	0	0	0	0	0	0	0	0	0	0	0	0	0	0	0	0	0	0	0
AMY1C	0	0	0	0	0	0	0	0	0	0	0	0	0	0	0	0	0	0	0	0	0	0	0	0	0	0	0	0	0	0	0	0	0	0	0	0	0	0	0	0	0	0	0	0	0	0	0	0	0
AMY1B	0	0	0	0	0	0	0	0	0	0	0	0	0	0	0	0	0	0	0	0	0	0	0	0	0	0	0	0	0	0	0	0	0	0	0	0	0	0	0	0	0	0	0	0	0	0	0	0	0
LOC100129138	0	0	0	0	0	0	0	0	0	0	1	1	0	1	0	0	0	0	0	0	0	0	0	0	0	1	0	0	0	0	0	0	0	0	0	1	0	0	0	0	1	0	0	0	0	0	0	0	0
PRMT6	116	93	196	0	0	0	0	0	0	0	0	0	0	0	0	0	149	204	665	0	0	0	103	114	125	277	0	0	0	111	77	249	0	0	0	0	0	0	0	0	0	0	0	0	0	222	100	244	1
NTNG1	46	25	36	0	0	0	0	0	0	1	0	0	0	0	0	0	9	8	23	0	0	0	28	40	18	49	0	0	0	30	26	110	0	0	0	0	0	0	0	0	0	0	0	0	0	14	11	14	0
VAV3	378	394	713	294	121	78	397	431	121	236	420	369	392	231	27	168	566	731	1986	20	128	234	80	97	89	142	35	125	124	220	255	698	421	272	193	82	54	222	49	97	100	188	69	14	29	388	269	393	67
VAV3-AS1	0	0	0	0	0	0	0	0	0	0	0	0	0	0	0	0	0	0	0	0	0	0	0	0	0	0	0	0	0	0	0	0	0	0	0	0	0	0	0	0	0	0	0	0	0	0	0	0	0
SLC25A24	832	722	1535	1207	653	419	155	199	224	431	995	1006	1026	1001	108	577	423	443	1575	4	301	544	267	252	408	1048	142	758	601	682	645	1956	1736	1118	975	43	25	577	109	1083	1352	2098	207	52	64	974	537	882	745
NBPF4	1	0	0	0	0	0	2	2	0	0	2	1	1	1	0	0	0	1	0	0	0	0	0	0	0	0	1	0	0	0	0	0	1	0	2	0	0	0	0	4	5	3	0	0	0	0	0	0	0
NBPF6	0	0	0	0	0	0	0	0	0	0	0	0	0	0	0	0	0	0	0	0	0	0	0	0	0	0	0	0	0	0	0	0	0	0	0	0	0	0	0	0	0	0	0	0	0	0	0	0	0
FAM102B	54	55	90	377	223	124	183	204	101	184	361	368	324	111	23	80	138	161	505	7	87	201	22	20	22	47	32	151	81	24	42	131	497	338	225	42	21	195	44	315	469	636	39	13	10	237	163	194	174
HENMT1	12	22	21	81	51	22	94	83	24	53	113	83	83	49	3	32	98	192	426	12	38	36	20	9	12	30	12	49	34	11	13	47	141	97	74	15	15	35	8	98	122	196	7	4	2	110	91	134	41
PRPF38B	2389	2142	2811	684	386	286	944	876	187	471	691	698	768	734	86	422	402	412	974	40	221	398	271	348	366	689	121	551	470	1577	2070	5775	1267	854	709	427	168	430	56	682	692	1348	325	96	87	847	538	695	414
FNDC7	0	0	4	0	0	0	0	0	0	1	0	0	0	2	0	0	0	0	0	0	0	0	0	0	0	0	0	1	2	0	1	0	0	0	0	0	1	10	1	0	0	0	4	0	0	0	0	0	0
STXBP3	424	394	744	553	267	193	426	372	114	280	527	487	479	469	53	303	164	177	558	7	109	263	148	185	300	611	63	344	279	295	388	984	881	486	363	109	39	470	61	651	736	1304	133	43	37	534	297	390	371
AKNAD1	1	7	2	11	4	3	7	2	3	5	9	8	6	0	0	0	0	0	0	0	1	2	3	5	13	13	3	0	0	3	2	11	11	6	11	4	5	13	2	8	14	34	0	0	0	0	0	0	3
GPSM2	407	318	711	470	261	191	88	104	130	278	597	582	558	86	6	54	211	393	962	20	162	307	218	232	228	464	11	51	28	242	272	712	651	477	332	16	6	328	74	481	572	1110	20	6	1	281	162	284	241
CLCC1	477	454	684	778	435	377	646	598	175	315	755	804	703	666	59	372	324	547	1298	84	242	410	87	89	121	249	91	499	383	383	419	1184	1122	856	638	171	108	386	74	624	640	1276	71	36	20	444	259	431	498
WDR47	570	549	986	272	140	117	109	97	40	111	210	216	188	194	11	114	50	59	214	5	63	88	237	232	361	743	33	162	121	506	557	1671	318	270	204	33	12	173	29	269	321	498	62	20	14	104	68	135	248
TAF13	617	508	1019	111	55	43	77	76	20	62	107	133	122	163	14	85	49	110	260	0	28	84	102	107	269	594	27	144	113	434	513	1624	203	112	85	31	7	94	20	173	165	266	108	24	28	185	85	170	246
TMEM167B	292	288	475	202	110	73	237	257	44	104	246	203	181	246	26	125	192	223	641	23	44	89	140	141	271	570	43	205	186	251	249	777	287	201	140	53	23	119	33	598	678	1141	87	32	23	507	318	469	166
SCARNA2	0	0	0	5	1	2	5	5	7	1	1	0	5	8	0	3	5	20	3	0	1	1	0	0	0	5	0	0	1	1	0	0	2	5	1	1	1	1	0	2	2	3	20	10	1	4	0	38	0
C1orf194	0	0	0	2	0	1	11	6	0	0	0	0	0	0	0	1	0	0	0	0	0	1	0	0	0	1	0	3	0	0	0	0	2	1	2	0	0	0	0	0	0	0	0	0	0	0	0	0	0
KIAA1324	15	14	18	49	19	15	44	30	12	29	29	34	21	302	44	228	1	0	7	10	10	15	3	7	5	6	16	105	94	6	13	22	39	43	32	4	7	18	6	23	22	33	41	9	8	1	0	2	24
SARS	3459	2856	4593	2187	1339	989	1579	1267	454	875	2025	1797	1812	4124	343	2622	745	1382	3240	633	560	908	1049	1091	1289	2498	450	2137	1632	3237	3144	9278	2710	2326	1688	422	311	1031	178	4802	4013	8202	621	149	184	3201	1493	3201	2027
CELSR2	1258	1469	1887	1116	576	446	930	853	207	357	1128	1244	993	230	18	158	52	100	277	49	320	627	415	356	237	452	35	156	101	1231	915	2946	1336	1093	875	239	148	162	81	574	540	893	51	14	11	95	55	90	306
PSRC1	133	123	193	657	410	295	586	367	129	270	747	657	585	132	13	90	155	395	707	143	184	278	39	29	27	43	10	41	36	71	84	293	715	693	478	108	93	221	75	322	388	749	30	10	14	162	68	165	150
MYBPHL	15	6	28	0	1	0	0	0	0	0	0	0	0	1	0	0	0	0	0	0	0	0	2	1	3	6	0	2	0	16	12	44	1	1	0	0	0	0	0	0	0	1	0	0	0	0	0	0	0
SORT1	1031	990	1415	1461	798	616	926	700	232	466	1266	1186	1022	1124	101	741	1008	1511	4346	125	291	618	173	218	167	357	103	547	407	746	739	2242	1845	1346	1109	184	125	397	103	1059	1126	1614	127	35	46	1536	923	1615	398
PSMA5	974	779	1272	2389	1239	968	2331	1899	436	908	2544	2284	1937	2411	220	1704	1284	2527	5129	822	566	936	664	711	970	1798	355	1675	1520	811	918	2797	3475	2477	1697	758	589	915	235	2445	2103	3855	333	89	109	2572	1298	2492	1830
SYPL2	1	0	0	1	2	3	5	8	0	0	1	3	2	4	0	0	0	2	0	0	1	1	0	0	0	1	1	0	5	3	0	0	2	3	1	2	0	3	0	4	0	2	0	1	0	0	0	0	0
ATXN7L2	34	24	31	66	29	19	153	115	6	21	63	63	62	28	1	23	12	28	83	9	11	26	21	17	28	54	3	17	16	36	32	74	47	58	42	32	25	12	4	36	38	68	14	0	3	37	13	49	29
CYB561D1	284	298	386	349	198	154	268	214	50	90	292	277	235	263	19	174	117	225	618	28	53	110	71	63	80	207	41	186	176	200	191	585	338	294	217	46	40	61	15	239	287	470	48	16	11	273	125	344	147
AMIGO1	6	8	13	54	29	14	21	9	8	14	60	46	50	26	1	11	13	19	65	1	20	26	8	3	8	9	3	8	11	3	4	18	61	48	44	1	0	12	2	34	47	80	9	1	3	32	12	21	8
GPR61	0	0	0	0	1	0	0	0	0	0	0	0	0	0	0	0	0	0	0	0	0	0	0	0	1	0	0	0	0	0	0	0	0	1	0	0	0	0	0	0	0	0	0	0	0	0	0	0	0
GNAI3	979	890	1764	1777	897	623	512	592	297	688	1496	1518	1386	1461	147	877	668	938	2475	79	436	803	580	567	999	2212	203	1091	890	845	918	2733	2588	1713	1254	138	91	893	154	1530	2136	3182	267	89	67	1275	662	1095	1203
MIR197	0	0	3	0	0	0	0	2	0	0	0	0	1	1	0	2	0	0	1	0	0	0	1	1	1	1	0	0	0	0	0	1	0	0	0	0	0	0	0	0	1	0	0	0	0	2	0	0	0
GNAT2	0	1	1	8	3	3	1	1	2	3	1	4	1	0	0	0	0	0	0	1	1	0	4	3	11	20	0	10	3	0	0	2	8	4	7	1	0	1	1	1	0	5	0	0	0	1	1	3	0
AMPD2	346	278	481	976	530	390	1394	1170	176	316	1120	998	921	729	55	511	244	495	1093	118	285	439	230	223	259	493	82	357	259	367	291	824	1004	997	756	329	257	258	80	505	550	1030	136	27	31	397	234	444	486
GSTM4	42	50	51	229	134	88	550	450	37	85	261	232	229	148	10	102	153	244	463	76	56	117	12	17	10	19	16	77	79	33	46	108	286	238	166	120	90	59	14	142	129	294	29	6	5	189	80	184	50
GSTM2	20	34	23	46	24	14	117	81	0	5	60	50	60	14	2	14	2	1	5	7	4	21	10	3	5	17	2	13	5	12	15	36	71	50	44	27	14	0	0	18	34	67	3	1	2	3	4	3	7
GSTM1	44	39	71	0	1	1	3	5	0	0	0	3	1	2	0	1	126	288	550	2	0	0	9	15	18	25	0	3	0	40	31	89	1	4	3	1	1	0	0	0	3	0	0	0	0	176	107	199	3
GSTM5	0	0	0	0	0	0	0	0	0	0	0	0	0	0	0	0	0	0	0	0	0	0	0	0	0	0	0	0	0	0	0	0	0	0	0	0	0	0	1	0	0	0	0	0	0	0	0	0	0
GSTM3	133	107	170	206	90	80	156	117	27	43	215	212	208	78	11	72	751	1551	3115	51	50	83	34	44	52	105	30	163	138	99	108	358	273	205	153	78	40	39	15	172	196	340	16	6	6	1411	872	1478	103
EPS8L3	1	0	0	79	46	31	1011	707	4	13	107	95	100	114	11	72	274	522	1228	24	39	97	0	0	0	0	10	27	22	1	0	3	64	82	45	223	137	7	2	24	19	68	29	6	11	881	489	949	21
CSF1	169	192	210	1306	789	629	2796	2293	215	404	864	904	816	807	74	640	81	113	339	109	286	445	27	40	31	55	117	576	518	230	204	526	1605	1590	1341	1282	811	234	80	1515	1681	3098	692	179	97	940	418	1085	2316
AHCYL1	2090	1868	3313	3173	1798	1370	1691	1929	764	1489	3370	3435	3098	2622	221	1616	866	1226	3489	255	918	1654	558	504	549	1154	296	1357	1025	1634	1826	5293	4236	3232	2631	400	263	1444	334	3341	3627	6522	502	135	126	1625	837	1519	2094
STRIP1	395	395	604	634	395	296	453	318	113	238	667	562	493	548	46	359	104	149	500	28	173	258	211	214	214	424	48	214	139	360	388	1107	733	614	473	171	116	157	34	463	522	859	146	28	22	215	88	226	371
ALX3	0	0	4	26	16	15	31	36	3	3	0	0	0	0	0	0	0	0	1	0	0	0	14	12	9	19	4	5	7	2	2	0	33	39	24	13	7	4	0	0	0	0	0	0	0	0	0	0	0
UBL4B	0	0	0	1	0	0	1	0	1	0	1	0	0	1	0	0	0	0	0	0	0	0	0	0	0	0	0	0	0	0	0	0	1	0	0	0	0	0	0	0	0	4	1	0	0	2	1	3	0
SLC6A17	5	2	4	152	74	74	23	15	23	32	136	144	118	68	4	40	6	8	28	11	29	59	2	0	2	4	12	73	31	2	1	6	147	131	95	17	12	26	16	112	102	182	5	2	5	13	3	6	172
KCNC4	77	67	73	196	111	92	102	63	19	51	108	95	122	138	16	116	97	177	498	10	37	48	54	44	52	115	16	58	47	82	51	200	192	170	129	51	42	13	8	98	129	184	40	16	10	97	67	124	120
RBM15	149	144	264	384	214	194	157	154	81	195	385	313	326	423	28	293	114	222	563	27	117	167	38	51	67	128	47	240	149	149	136	380	419	403	272	53	15	110	24	262	293	366	212	57	44	335	166	312	185
SLC16A4	318	336	598	1026	493	405	2062	2040	223	411	1184	1256	1106	1523	160	968	17	12	36	26	282	650	55	59	78	146	207	856	723	244	256	845	1765	1083	852	1193	539	374	92	2431	2616	4729	272	77	74	56	16	30	1577
LAMTOR5	553	434	907	1501	863	608	2420	1748	232	508	1276	1183	948	1530	111	1075	454	844	1819	294	313	493	346	447	705	1194	261	1076	932	416	487	1385	2055	1559	1008	773	482	390	83	962	1175	1949	240	88	66	571	339	649	773
PROK1	0	0	0	0	0	0	3	0	0	0	0	0	0	2	0	0	0	0	0	1	0	0	0	0	0	0	0	0	1	0	0	0	0	0	0	0	0	0	0	0	0	0	0	0	0	0	0	0	0
CYMP	1	0	2	0	0	0	0	0	0	0	0	0	0	4	1	2	0	0	0	0	0	0	0	0	1	0	0	0	0	1	1	0	1	0	0	0	0	0	0	0	0	0	2	0	0	2	0	0	4
KCNA10	0	0	0	0	0	0	0	0	0	0	0	0	0	0	0	0	0	0	0	0	0	0	0	0	0	0	1	1	0	0	0	1	0	0	1	0	0	0	0	0	0	0	0	0	0	0	0	0	0
KCNA2	0	0	0	0	0	0	0	0	0	1	0	2	0	0	0	0	0	0	0	0	0	0	0	0	0	0	0	0	0	1	0	0	1	0	0	0	0	0	0	1	0	2	0	0	0	0	0	0	0
KCNA3	0	0	0	0	0	0	0	0	0	0	0	0	0	0	0	0	0	0	0	0	0	0	0	0	0	0	0	1	0	0	0	0	0	0	0	0	0	0	0	0	1	0	0	0	0	0	0	0	1
CD53	0	0	0	2	0	0	1	1	0	0	0	0	0	0	0	0	0	0	1	0	0	0	0	0	1	0	0	5	1	0	0	0	3	0	1	0	1	1	0	0	0	0	0	0	0	0	0	0	1
LRIF1	163	217	364	408	225	111	199	294	138	367	432	455	469	545	62	300	174	229	596	1	104	228	63	88	142	345	113	581	503	160	164	409	793	479	314	79	39	453	87	588	686	1204	227	73	79	660	420	640	682
DRAM2	590	592	1066	555	299	168	475	528	95	298	472	488	388	460	38	255	344	598	1376	60	107	211	186	178	273	661	72	328	297	475	573	1300	900	535	359	162	80	370	73	968	1221	1961	113	33	25	820	501	770	311
CEPT1	675	584	1154	312	177	80	250	318	82	148	316	309	294	228	19	110	219	300	760	17	96	158	135	162	234	490	32	160	146	555	540	1338	532	297	227	64	39	138	30	383	422	703	40	25	9	415	256	465	174
DENND2D	298	254	394	31	8	13	63	43	6	10	30	23	26	70	12	37	105	215	527	5	4	9	104	98	101	212	5	32	23	242	253	727	37	27	24	20	10	14	2	37	40	68	13	3	7	297	146	326	16
CHI3L2	3	0	3	1	2	0	30	22	0	0	4	2	5	15	1	11	3	13	10	0	0	2	4	0	1	4	1	2	3	0	5	24	3	4	2	9	6	2	0	1	3	5	2	2	7	16	3	11	8
CHIAP2	0	0	0	0	0	0	0	0	0	0	0	0	0	0	0	0	0	0	0	0	0	0	0	0	0	0	0	0	0	0	0	0	0	0	0	0	0	0	0	0	0	0	0	0	0	0	0	0	0
CHIA	0	0	0	0	0	0	0	0	0	0	0	0	0	0	0	0	0	0	0	0	0	0	0	0	0	0	0	0	0	0	0	0	0	0	0	0	0	0	0	0	0	0	0	0	0	0	0	0	0
PIFO	9	15	10	10	7	6	37	33	1	7	6	6	4	23	1	10	4	6	21	0	0	4	2	1	4	6	3	9	10	6	4	17	10	5	4	6	1	6	0	8	9	19	6	1	1	8	2	8	1
PGCP1	0	0	0	0	0	0	0	0	0	0	0	0	0	0	0	0	0	0	0	0	0	0	0	0	0	0	0	0	0	0	0	0	0	0	0	0	0	0	0	0	0	0	0	0	0	0	0	0	0
OVGP1	37	41	91	24	16	7	207	108	5	16	25	23	11	68	8	51	16	30	59	5	3	12	9	10	8	10	3	16	17	33	44	174	20	12	14	27	12	16	1	19	14	13	42	8	8	43	25	36	5
WDR77	774	646	1184	972	609	403	641	636	190	264	1096	989	814	1144	106	790	259	536	1212	200	269	409	486	515	739	1373	94	392	338	615	645	2088	1139	1026	775	211	140	253	114	694	621	1243	158	51	47	356	200	334	527
C1orf162	7	7	15	1	2	3	11	3	0	2	5	5	3	4	0	1	5	4	7	4	1	0	4	3	5	2	0	4	0	3	5	24	6	3	2	5	1	19	1	2	2	8	0	1	0	9	6	9	0
ADORA3	0	0	0	0	0	0	0	0	0	0	1	0	0	0	0	0	1	1	0	0	0	0	0	0	0	0	0	1	1	0	0	0	0	0	0	0	0	0	0	0	0	0	0	0	0	0	0	0	0
RAP1A	620	509	784	382	168	162	246	207	66	163	399	354	276	273	23	132	289	356	1015	6	85	152	164	237	347	814	45	208	169	394	454	1312	511	352	256	54	32	290	50	486	523	904	65	11	22	571	281	543	210
DDX20	239	222	406	436	221	159	236	220	77	177	403	491	416	302	27	182	104	182	438	26	112	202	106	111	207	405	42	184	160	227	264	691	683	432	322	43	29	149	37	382	380	695	131	43	37	330	178	294	202
KCND3	6	0	0	0	0	0	0	0	0	0	0	0	0	0	0	0	0	0	0	0	0	0	1	0	0	2	0	0	0	1	5	2	0	0	0	0	0	0	0	0	0	0	0	0	0	0	0	0	0
CTTNBP2NL	1160	993	1672	595	273	227	110	171	100	227	504	517	472	554	61	338	277	269	1020	16	111	263	198	172	270	603	55	349	268	999	1021	2994	665	545	395	46	32	297	59	580	839	1378	195	49	40	874	497	841	562
MIR4256	0	0	0	0	0	0	0	0	0	0	0	0	0	0	0	0	0	0	0	0	0	0	0	0	1	0	0	0	0	0	1	0	0	0	0	0	0	0	0	0	0	0	0	0	0	0	0	0	0
WNT2B	5	6	14	20	5	3	14	6	3	3	7	11	4	3	1	5	20	34	85	2	3	6	2	5	7	15	1	4	4	9	7	13	14	10	6	5	4	5	1	12	19	19	4	1	0	32	15	29	9
ST7L	120	97	178	152	91	66	163	172	33	82	136	151	161	172	11	76	88	148	303	14	32	73	38	35	51	92	10	89	66	67	99	234	221	154	113	74	37	58	8	153	159	303	49	16	14	156	100	166	89
CAPZA1	1979	1986	3638	2265	1097	737	1020	1289	484	1021	2327	2568	2118	2210	242	1367	1320	1517	4290	66	643	1163	1120	1277	2175	4366	348	1575	1267	1539	1784	5044	3555	2140	1596	401	180	1302	284	1893	2527	4133	487	120	110	2115	1274	1958	2186
MOV10	827	850	1102	1097	604	482	1821	1382	153	345	1157	1151	975	1227	118	870	312	617	1523	295	255	395	318	335	302	607	155	800	627	817	712	1995	1355	1211	1033	1158	693	152	91	876	849	1706	178	50	47	1197	595	1310	728
RHOC	4242	3841	6336	4355	2627	1898	4931	3671	631	1148	4722	3782	3436	6149	552	4365	2221	5009	9744	3014	1085	1798	3352	3491	3822	6833	532	2675	2312	4774	4012	12683	4780	4563	3240	1550	1297	968	298	2182	2390	4401	849	233	174	3876	1984	4310	2735
PPM1J	66	60	81	14	5	6	31	20	2	4	11	17	12	12	3	5	9	62	90	11	2	6	31	31	38	74	2	2	5	71	61	178	17	23	13	16	9	2	0	15	20	21	3	0	0	73	50	90	5
FAM19A3	0	1	3	5	0	2	5	0	0	0	3	2	1	0	0	1	0	0	0	1	2	1	0	0	0	1	0	0	0	1	2	0	1	3	1	0	0	2	0	11	8	13	1	0	0	2	0	3	5
SLC16A1	2584	2471	4230	1273	644	493	450	603	227	454	1143	1137	1120	1558	144	1010	458	585	1703	42	296	563	759	815	1194	2595	237	1272	1021	2369	2619	6471	1866	1234	957	191	90	543	158	1637	1709	2930	257	94	63	1297	627	1140	1304
AKR7A2P1	0	2	0	2	0	0	0	0	0	3	0	0	0	0	0	0	0	0	0	0	0	0	0	0	4	4	0	2	0	0	0	0	2	1	0	0	0	0	1	0	0	0	0	0	0	0	0	0	0
LRIG2	107	69	166	147	102	48	181	136	32	59	136	127	115	115	7	73	44	40	184	2	30	47	33	41	51	118	17	104	52	89	94	261	210	156	118	59	28	83	15	200	203	343	49	9	12	214	101	180	63
LOC643441	0	0	0	0	1	0	5	2	0	0	0	0	0	1	0	1	0	0	0	0	0	0	0	0	0	0	0	1	0	0	0	0	0	1	1	0	0	0	0	0	0	0	0	1	0	0	0	0	0
MAGI3	191	176	255	371	184	152	228	293	101	207	409	350	348	509	47	273	78	84	313	9	119	228	71	72	61	149	69	295	206	157	136	446	454	326	289	50	30	216	31	400	468	663	128	30	26	150	83	139	239
PHTF1	199	169	266	518	290	237	287	259	93	214	478	468	454	338	30	156	124	175	460	46	136	209	64	57	89	151	59	232	154	132	169	489	750	537	432	124	53	287	54	372	387	608	81	27	26	156	73	160	327
RSBN1	136	149	277	146	74	52	118	124	33	93	147	172	138	99	14	61	68	75	243	4	50	108	46	43	97	166	26	112	68	154	113	306	190	120	106	45	10	117	25	149	237	367	51	20	15	214	100	199	116
PTPN22	2	2	7	0	0	0	9	2	0	0	0	0	0	2	0	1	2	5	15	0	0	0	3	1	3	9	0	4	0	2	7	8	0	0	0	0	0	0	1	0	0	0	2	0	0	7	4	9	3
AP4B1-AS1	1	5	0	3	5	0	7	3	1	3	0	0	0	0	0	0	0	0	0	0	0	0	0	2	2	2	2	3	2	2	0	3	4	4	6	2	0	3	0	0	0	0	0	0	0	0	0	0	0
BCL2L15	10	3	28	36	17	11	147	128	3	16	29	31	33	79	5	41	228	299	763	18	14	32	1	2	14	20	15	71	96	16	10	22	48	35	26	47	29	35	5	14	22	40	21	6	5	420	255	407	26
AP4B1	146	121	154	169	87	80	236	207	24	55	277	272	230	145	15	90	113	279	568	39	66	109	39	61	63	161	22	75	66	111	130	381	258	155	114	47	37	50	12	227	261	530	39	5	14	315	169	314	215
DCLRE1B	159	117	242	318	147	143	83	101	51	111	387	343	324	57	2	44	113	186	468	13	82	150	95	82	89	138	21	72	57	130	136	405	427	322	262	17	14	128	40	299	296	521	12	4	2	235	109	250	137
HIPK1	666	536	861	886	466	406	293	293	213	351	1020	976	866	506	53	331	261	336	1180	15	278	496	213	205	181	407	97	420	321	514	521	1627	1099	824	663	91	66	452	87	1012	1163	1594	210	27	47	605	381	636	719
OLFML3	7	7	11	47	23	16	331	239	27	58	93	100	95	1153	98	727	0	6	5	19	26	48	9	2	3	7	8	27	44	13	10	35	53	66	48	98	87	54	22	13	18	25	158	60	37	5	0	4	26
SYT6	0	0	0	20	12	5	36	35	11	15	23	30	18	110	11	72	0	0	0	1	14	13	0	0	0	0	0	7	7	0	0	0	21	15	11	14	9	29	4	6	8	12	25	7	7	0	0	0	6
TRIM33	736	794	1382	566	311	250	437	419	119	315	625	591	620	560	70	300	241	226	845	71	191	346	138	148	194	480	84	467	375	748	674	2087	833	605	455	127	91	438	97	696	872	1370	166	41	50	621	376	604	479
BCAS2	355	362	766	433	253	133	249	313	118	227	481	491	451	364	41	246	214	300	908	24	143	207	131	151	344	782	62	308	260	308	307	805	729	510	333	109	32	345	46	439	433	910	92	18	29	351	191	298	316
DENND2C	191	175	306	9	5	5	5	6	2	4	10	7	9	5	1	3	19	10	36	0	2	5	57	46	110	207	0	7	5	181	168	489	9	10	8	2	1	5	0	12	9	37	2	0	1	39	8	37	3
AMPD1	1	1	0	0	0	0	0	0	0	0	0	1	0	0	0	0	0	0	2	1	0	0	1	0	0	0	0	0	1	0	0	0	0	0	0	0	0	0	0	0	0	0	0	0	0	0	0	1	0
NRAS	502	517	1121	1301	602	451	622	586	229	448	1070	1141	1043	1415	150	928	375	506	1431	46	338	697	271	303	477	1189	169	771	696	449	434	1375	1908	1067	872	165	76	720	144	1505	1969	2968	364	89	94	871	499	792	1121
CSDE1	9757	8369	14749	6446	3207	2535	3518	3431	1343	2849	6394	6292	6073	5486	466	3252	3436	5411	13350	663	1765	3315	2542	2541	2998	6216	814	3662	2851	7846	8400	24691	9648	6640	4903	1066	698	4308	785	7823	8855	15385	868	249	224	7361	4095	6759	4810
SIKE1	237	227	481	280	149	101	239	177	82	151	273	296	285	222	26	162	207	248	661	32	77	166	145	182	281	633	24	176	124	200	204	627	395	259	215	84	41	232	52	438	556	809	79	33	26	407	232	344	195
SYCP1	0	0	0	0	0	0	0	0	0	0	0	0	0	0	0	0	0	0	0	0	0	0	0	0	0	0	0	0	0	0	0	0	0	0	0	0	0	0	1	0	0	0	0	0	0	0	0	0	0
TSHB	0	0	0	0	0	0	0	0	0	0	0	0	0	0	0	0	0	0	0	0	0	0	0	0	0	0	0	0	0	0	0	0	0	0	0	0	0	0	0	0	0	0	0	0	0	0	0	0	0
TSPAN2	8	6	21	31	16	8	14	7	1	2	37	27	26	59	4	35	53	67	207	0	5	8	4	3	7	6	10	16	22	5	15	16	43	34	16	1	0	3	0	75	118	179	6	3	3	297	168	231	4
NGF	0	6	4	12	8	6	0	0	1	1	15	6	9	14	2	7	0	0	0	0	0	1	0	4	2	2	6	11	8	1	4	6	9	8	9	0	0	6	0	8	12	40	3	0	0	0	0	0	5
VANGL1	882	930	1472	1089	653	454	386	384	198	423	1029	1034	983	338	22	238	342	534	1466	43	328	638	388	438	427	891	42	222	173	769	729	2286	1393	1153	876	117	57	355	92	763	834	1372	78	14	15	533	306	610	543
CASQ2	1	3	4	0	0	0	0	0	0	0	0	0	0	0	0	0	0	0	0	0	0	0	1	0	0	3	0	0	0	4	1	9	0	0	0	0	0	0	0	0	0	0	0	0	0	0	0	1	0
NHLH2	40	37	56	0	0	0	0	0	0	0	0	0	0	0	0	0	0	0	0	0	0	0	6	7	17	33	0	0	0	27	17	40	0	0	0	0	0	3	0	0	0	0	0	0	0	0	0	0	0
SLC22A15	311	303	511	29	28	17	37	38	9	17	43	31	35	18	0	11	21	42	77	2	6	12	41	40	88	168	3	19	15	262	299	678	59	27	38	21	4	9	8	108	73	145	5	1	1	101	53	97	31
MAB21L3	36	31	56	0	0	0	0	0	0	0	0	1	0	3	0	1	0	0	2	0	0	0	4	1	6	15	0	0	1	17	17	73	0	1	0	0	0	0	0	0	0	0	0	0	0	2	0	0	1
ATP1A1	9460	8744	13150	4231	2498	1866	3706	3154	667	1193	5722	5281	4558	5342	405	3475	7829	13219	33642	487	1515	2578	1831	1803	2110	4081	539	2594	2114	7238	7765	21809	5053	4536	3463	1014	759	1357	369	4859	5342	8996	676	193	204	10789	5444	11295	4449
CD58	72	127	290	286	157	91	205	320	61	117	241	289	272	237	24	152	185	237	590	18	64	136	62	70	166	335	32	180	163	101	100	235	513	295	199	124	57	212	36	245	431	678	65	15	15	355	215	296	273
IGSF3	2359	2207	3774	2558	1450	1070	1262	1204	494	950	2494	2381	2183	1434	114	881	598	874	2464	63	705	1330	800	796	919	1791	132	560	432	2294	2098	6178	3087	2659	2048	389	256	585	173	2164	2287	3815	232	69	55	1343	714	1454	1478
MIR320B1	0	0	0	0	0	0	0	0	0	0	0	0	0	0	0	0	0	0	0	0	0	0	0	0	0	0	0	0	0	0	0	0	0	0	0	0	0	0	0	0	0	0	0	0	0	0	0	0	0
CD2	0	0	0	0	0	0	0	0	0	0	0	0	0	0	0	0	0	0	0	0	0	0	0	0	0	0	0	1	0	0	0	0	0	0	0	0	0	0	0	0	0	0	0	0	0	0	0	0	0
PTGFRN	6859	6258	10083	1115	638	482	814	812	199	314	1186	1179	1008	573	51	425	635	916	2441	68	294	570	2013	2080	1803	3828	117	467	341	6135	6085	17183	1518	1206	924	236	143	258	57	1049	1128	1845	124	43	31	874	514	953	507
CD101	24	31	66	5	3	2	21	14	1	2	5	10	4	9	1	3	3	4	14	3	0	3	8	6	6	12	2	9	4	25	41	95	4	6	7	3	3	0	0	2	3	10	3	0	0	2	2	7	4
TTF2	250	242	410	981	548	442	283	264	223	461	862	807	768	311	33	209	241	330	986	12	258	377	143	155	106	216	25	171	125	249	304	747	1248	1026	813	77	44	547	91	619	475	775	46	16	18	368	155	314	476
MIR942	0	0	0	0	0	0	0	0	0	0	0	0	0	0	0	0	0	0	3	0	0	0	0	0	0	0	0	0	0	0	0	2	0	1	0	0	0	0	0	0	0	0	1	0	0	0	0	0	0
TRIM45	43	54	62	127	84	56	156	144	41	39	136	138	119	118	16	99	42	53	126	13	34	54	27	20	23	62	11	76	65	42	32	120	140	122	102	41	26	40	13	92	96	166	9	2	0	55	26	56	33
VTCN1	249	166	296	2	0	0	2	2	0	1	2	1	1	56	4	45	378	589	1524	2	2	3	16	20	16	29	5	19	23	98	92	212	8	1	1	0	0	0	1	1	1	0	0	1	0	735	458	723	1
MAN1A2	865	884	1428	462	224	186	224	465	124	239	469	443	463	433	48	218	179	125	568	13	147	258	191	238	248	534	97	405	266	589	696	1969	723	452	381	28	25	291	64	488	670	927	85	26	24	240	130	218	305
GDAP2	189	223	347	229	118	84	138	154	67	134	221	260	198	366	30	208	111	124	390	15	75	125	84	55	99	264	59	218	211	194	200	575	381	228	176	58	24	128	45	308	337	568	100	23	35	182	118	207	223
WDR3	805	612	1169	1067	555	396	407	500	241	523	1113	1085	1069	1057	96	564	390	618	1651	26	314	527	263	293	390	828	118	536	454	635	712	2139	1521	1176	872	111	65	707	117	1472	1260	2261	177	51	64	953	456	827	725
SPAG17	11	23	42	0	1	0	2	0	0	0	0	1	0	0	0	0	1	2	3	0	0	0	0	1	2	9	0	0	0	21	11	44	4	2	2	0	0	2	0	1	0	0	0	0	0	4	5	6	1
TBX15	0	0	0	0	0	0	2	0	1	1	0	0	0	9	2	3	1	2	5	0	0	0	0	0	0	0	1	8	10	0	0	0	1	2	0	0	0	1	0	4	3	2	6	3	0	9	13	20	0
[truncated: 20,681 more rows]
[truncated: 29 more columns]
